# Supplementary material for: Glucocorticoid Treatment Leads to Aberrant Ion and Macromolecular Transport in Regenerating Zebrafish Fins
Source: Front Endocrinol (Lausanne). 2019 Oct 4;10:674. doi: 10.3389/fendo.2019.00674 (PMC6787175; doi:10.3389/fendo.2019.00674)
Supplement: Supplementary file 5 [file Table_5.XLSX]

## Sheet: Description
Table S5: Results of functional enrichment and clustering of significantly affected proteins after prednisolone treatment
The following values are listed for each enriched term
Cluster	Cluster number and enrichment Score (E.-Score) of Cluster identified by DAVID analysis
Term	Name of Term identified as enriched in the analysis
Count	Number of proteins assigned to the corresponding term
p value (BH)	Benjamini-Hochberg adjusted EASE-score as measure of significance of enrichment
Proteins	List of Uniprot Accessions of all proteins assigend to the corresponding term
Genes	List of gene names of all proteins assigend to the corresponding term
Names	List of protein names of all proteins assigend to the corresponding term

## Sheet: Table_S5
Cluster	Term	Count	p value (BH)	Proteins	Genes	Names
Cluster 1 (E-Score=3.0)	GO:0008324~cation transmembrane transporter activity	11	0.00665573	F1Q4P9, E7F2K4, F1QKF2, I3ISJ2, E7FG36, Q9DGL6, F1R1X4, Q9DEU2, F1RC25, Q6ZM60, B0R068	atp2a3, si:ch211-140m22.7, atp2b4, uqcrh, slc12a2, atp1a1a.1 atp1a1, atp13a1, atp1a3b, trpm4b.2 TRPM4b1 trpm4c, atp2a2b atp2a2a, atp1a1b	Calcium-transporting ATPase (EC 3.6.3.8), Si:ch211-140m22.7, Calcium-transporting ATPase (EC 3.6.3.8), Cytochrome b-c1 complex subunit 6, Solute carrier family 12 (sodium/potassium/chloride transporter), member 2 (Fragment), Sodium/potassium-transporting ATPase subunit alpha (EC 3.6.3.-), Cation-transporting ATPase (EC 3.6.3.-), Sodium/potassium-transporting ATPase subunit alpha (EC 3.6.3.-), Tra…
	GO:0016462~pyrophosphatase activity	11	0.0126564	F1Q4P9, Q6P9Z2, F1QKF2, Q9DGL6, F1QWV5, A3KPX2, F1R1X4, Q9DEU2, Q6ZM60, B0R068, F1QUY3	atp2a3, ddx23, atp2b4, atp1a1a.1 atp1a1, chd4a, abcf1, atp13a1, atp1a3b, atp2a2b atp2a2a, atp1a1b, dhx58	Calcium-transporting ATPase (EC 3.6.3.8), DEAD (Asp-Glu-Ala-Asp) box polypeptide 23, Calcium-transporting ATPase (EC 3.6.3.8), Sodium/potassium-transporting ATPase subunit alpha (EC 3.6.3.-), Chromodomain helicase DNA-binding protein 4a, ATP-binding cassette, sub-family F (GCN20), member 1, Cation-transporting ATPase (EC 3.6.3.-), Sodium/potassium-transporting ATPase subunit alpha (EC 3.6.3.-), C…
	GO:0016887~ATPase activity	10	0.000972279	F1Q4P9, Q6P9Z2, F1QKF2, Q9DGL6, F1QWV5, A3KPX2, F1R1X4, Q9DEU2, Q6ZM60, B0R068	atp2a3, ddx23, atp2b4, atp1a1a.1 atp1a1, chd4a, abcf1, atp13a1, atp1a3b, atp2a2b atp2a2a, atp1a1b	Calcium-transporting ATPase (EC 3.6.3.8), DEAD (Asp-Glu-Ala-Asp) box polypeptide 23, Calcium-transporting ATPase (EC 3.6.3.8), Sodium/potassium-transporting ATPase subunit alpha (EC 3.6.3.-), Chromodomain helicase DNA-binding protein 4a, ATP-binding cassette, sub-family F (GCN20), member 1, Cation-transporting ATPase (EC 3.6.3.-), Sodium/potassium-transporting ATPase subunit alpha (EC 3.6.3.-), C…
	GO:0055082~cellular chemical homeostasis	8	0.0438295	F1Q4P9, F1QKF2, Q9DGL6, F1R1X4, Q9DEU2, Q6ZM60, B0R068, Q803U6	atp2a3, atp2b4, atp1a1a.1 atp1a1, atp13a1, atp1a3b, atp2a2b atp2a2a, atp1a1b, aqp3a aqp3	Calcium-transporting ATPase (EC 3.6.3.8), Calcium-transporting ATPase (EC 3.6.3.8), Sodium/potassium-transporting ATPase subunit alpha (EC 3.6.3.-), Cation-transporting ATPase (EC 3.6.3.-), Sodium/potassium-transporting ATPase subunit alpha (EC 3.6.3.-), Calcium-transporting ATPase (EC 3.6.3.8), Sodium/potassium-transporting ATPase subunit alpha (EC 3.6.3.-), Aqp3 protein (Aquaporin 3) (Aquaporin…
	GO:0050801~ion homeostasis	8	0.037808	F1Q4P9, B0UXS0, F1QKF2, Q9DGL6, F1R1X4, Q9DEU2, Q6ZM60, B0R068	atp2a3, hmox1a hmox1, atp2b4, atp1a1a.1 atp1a1, atp13a1, atp1a3b, atp2a2b atp2a2a, atp1a1b	Calcium-transporting ATPase (EC 3.6.3.8), Heme oxygenase (EC 1.14.14.18), Calcium-transporting ATPase (EC 3.6.3.8), Sodium/potassium-transporting ATPase subunit alpha (EC 3.6.3.-), Cation-transporting ATPase (EC 3.6.3.-), Sodium/potassium-transporting ATPase subunit alpha (EC 3.6.3.-), Calcium-transporting ATPase (EC 3.6.3.8), Sodium/potassium-transporting ATPase subunit alpha (EC 3.6.3.-)
	GO:0022804~active transmembrane transporter activity	8	0.0132826	F1Q4P9, F1QKF2, E7FG36, Q9DGL6, F1R1X4, Q9DEU2, Q6ZM60, B0R068	atp2a3, atp2b4, slc12a2, atp1a1a.1 atp1a1, atp13a1, atp1a3b, atp2a2b atp2a2a, atp1a1b	Calcium-transporting ATPase (EC 3.6.3.8), Calcium-transporting ATPase (EC 3.6.3.8), Solute carrier family 12 (sodium/potassium/chloride transporter), member 2 (Fragment), Sodium/potassium-transporting ATPase subunit alpha (EC 3.6.3.-), Cation-transporting ATPase (EC 3.6.3.-), Sodium/potassium-transporting ATPase subunit alpha (EC 3.6.3.-), Calcium-transporting ATPase (EC 3.6.3.8), Sodium/potassiu…
	GO:0019829~cation-transporting ATPase activity	7	2.91552e-05	F1Q4P9, F1QKF2, Q9DGL6, F1R1X4, Q9DEU2, Q6ZM60, B0R068	atp2a3, atp2b4, atp1a1a.1 atp1a1, atp13a1, atp1a3b, atp2a2b atp2a2a, atp1a1b	Calcium-transporting ATPase (EC 3.6.3.8), Calcium-transporting ATPase (EC 3.6.3.8), Sodium/potassium-transporting ATPase subunit alpha (EC 3.6.3.-), Cation-transporting ATPase (EC 3.6.3.-), Sodium/potassium-transporting ATPase subunit alpha (EC 3.6.3.-), Calcium-transporting ATPase (EC 3.6.3.8), Sodium/potassium-transporting ATPase subunit alpha (EC 3.6.3.-)
	GO:0006873~cellular ion homeostasis	7	0.0404067	F1Q4P9, F1QKF2, Q9DGL6, F1R1X4, Q9DEU2, Q6ZM60, B0R068	atp2a3, atp2b4, atp1a1a.1 atp1a1, atp13a1, atp1a3b, atp2a2b atp2a2a, atp1a1b	Calcium-transporting ATPase (EC 3.6.3.8), Calcium-transporting ATPase (EC 3.6.3.8), Sodium/potassium-transporting ATPase subunit alpha (EC 3.6.3.-), Cation-transporting ATPase (EC 3.6.3.-), Sodium/potassium-transporting ATPase subunit alpha (EC 3.6.3.-), Calcium-transporting ATPase (EC 3.6.3.8), Sodium/potassium-transporting ATPase subunit alpha (EC 3.6.3.-)
	GO:0015992~proton transport	5	0.0347624	E7F2K4, Q9DGL6, Q6NYQ7, Q9DEU2, B0R068	si:ch211-140m22.7, atp1a1a.1 atp1a1, nnt, atp1a3b, atp1a1b	Si:ch211-140m22.7, Sodium/potassium-transporting ATPase subunit alpha (EC 3.6.3.-), Nicotinamide nucleotide transhydrogenase, Sodium/potassium-transporting ATPase subunit alpha (EC 3.6.3.-), Sodium/potassium-transporting ATPase subunit alpha (EC 3.6.3.-)
	GO:0071436~sodium ion export	3	0.0450694	Q9DGL6, Q9DEU2, B0R068	atp1a1a.1 atp1a1, atp1a3b, atp1a1b	Sodium/potassium-transporting ATPase subunit alpha (EC 3.6.3.-), Sodium/potassium-transporting ATPase subunit alpha (EC 3.6.3.-), Sodium/potassium-transporting ATPase subunit alpha (EC 3.6.3.-)
	GO:0005391~sodium:potassium-exchanging ATPase activity	3	0.0102614	Q9DGL6, Q9DEU2, B0R068	atp1a1a.1 atp1a1, atp1a3b, atp1a1b	Sodium/potassium-transporting ATPase subunit alpha (EC 3.6.3.-), Sodium/potassium-transporting ATPase subunit alpha (EC 3.6.3.-), Sodium/potassium-transporting ATPase subunit alpha (EC 3.6.3.-)
	GO:0008556~potassium-transporting ATPase activity	3	0.0119267	Q9DGL6, Q9DEU2, B0R068	atp1a1a.1 atp1a1, atp1a3b, atp1a1b	Sodium/potassium-transporting ATPase subunit alpha (EC 3.6.3.-), Sodium/potassium-transporting ATPase subunit alpha (EC 3.6.3.-), Sodium/potassium-transporting ATPase subunit alpha (EC 3.6.3.-)
	GO:0005388~calcium-transporting ATPase activity	3	0.0153436	F1Q4P9, F1QKF2, Q6ZM60	atp2a3, atp2b4, atp2a2b atp2a2a	Calcium-transporting ATPase (EC 3.6.3.8), Calcium-transporting ATPase (EC 3.6.3.8), Calcium-transporting ATPase (EC 3.6.3.8)
Cluster 2 (E-Score=2.5)	GO:0033036~macromolecule localization	13	0.0443952	E7FBD3, Q6PBX2, F1REE8, A0A0R4IXL8, F1QJ31, F1R2T3, A0A0R4ICL5, A0A0B4J1A6, Q6YLH9, F1QQQ3, Q7ZV08, E7FEK9, Q5TZ29	apoba, sar1b sara2, trip11, , iws1, vtg7, sec24a, igf2bp1, cav1 CAV1, vtg3, scamp2, golga4, apobb.1 apobl	Apolipoprotein Ba, SAR1a gene homolog 2 (S. cerevisiae) (Secretion-associated, Ras-related GTPase 1B), Thyroid hormone receptor interactor 11, , Uncharacterized protein, Vitellogenin 7, SEC24 homolog A, COPII coat complex component, Insulin-like growth factor 2 mRNA-binding protein 1, Caveolin, Vitellogenin 3, phosvitinless, Secretory carrier-associated membrane protein (Secretory carrier membran…
	GO:0006869~lipid transport	6	0.0393543	F1R2T3, E7FBD3, F1QQQ3, Q6YLH9, Q6PBX2, Q5TZ29	vtg7, apoba, vtg3, cav1 CAV1, sar1b sara2, apobb.1 apobl	Vitellogenin 7, Apolipoprotein Ba, Vitellogenin 3, phosvitinless, Caveolin, SAR1a gene homolog 2 (S. cerevisiae) (Secretion-associated, Ras-related GTPase 1B), Apolipoprotein Bb, tandem duplicate 1
	GO:0010876~lipid localization	6	0.0469303	F1R2T3, E7FBD3, F1QQQ3, Q6YLH9, Q6PBX2, Q5TZ29	vtg7, apoba, vtg3, cav1 CAV1, sar1b sara2, apobb.1 apobl	Vitellogenin 7, Apolipoprotein Ba, Vitellogenin 3, phosvitinless, Caveolin, SAR1a gene homolog 2 (S. cerevisiae) (Secretion-associated, Ras-related GTPase 1B), Apolipoprotein Bb, tandem duplicate 1
other	dre03040:Spliceosome	7	0.00129992	Q6P9Z2, F1QNA5, E7EZ02, U3JB26, Q802Y1, F1RAV6, Q6TLH9	ddx23, srsf6a, lsm8 LSM8, srsf2a, srsf4 sfrs4 zgc:55809, acin1a, zmat2	DEAD (Asp-Glu-Ala-Asp) box polypeptide 23, Serine/arginine-rich-splicing factor 6a, U6 snRNA-associated Sm-like protein LSm8, Serine/arginine-rich-splicing factor 2a (Fragment), Serine/arginine-rich-splicing factor 4 (Zgc:55809) (Zgc:55809 protein), Apoptotic chromatin condensation inducer 1a, Z2610510D14Rik (Zinc finger, matrin-type 2)
	GO:0004579~dolichyl-diphosphooligosaccharide-protein glycotransferase activity	3	0.00703614	A0A0R4IR75, F1QTB5, E7EZE2	stt3a, rpn1, stt3b	STT3A, subunit of the oligosaccharyltransferase complex (catalytic), Dolichyl-diphosphooligosaccharide--protein glycosyltransferase subunit 1 (EC 2.4.99.18), STT3B, subunit of the oligosaccharyltransferase complex (catalytic)
