# Supplementary material for: Glucocorticoid Treatment Leads to Aberrant Ion and Macromolecular Transport in Regenerating Zebrafish Fins
Source: Front Endocrinol (Lausanne). 2019 Oct 4;10:674. doi: 10.3389/fendo.2019.00674 (PMC6787175; doi:10.3389/fendo.2019.00674)
Supplement: Supplementary file 8 [file Table_8.XLSX]

## Sheet: Description
Table S8: Comparison of protein identifications from previouse proteomics zebrafish fin regeneration studies with common identifications (Table S8A) and the provided Uniprot accession (Table S8B)
The following studies were compared
this study	all Identifications from this study (degrouped protein groups)
Kessels et al. 2014 PlosOne	https://doi.org/10.1371/journal.pone.0090568
Singh et al. 2011 J Sep Sci	https://doi.org/10.1002/jssc.201000626
Rabinowitz et al. 2017 PNAS	https://doi.org/10.1073/pnas.1620755114
Saxena et al. 2012 Mol Cell Proteomics	https://doi.org/10.1074/mcp.M111.014118
The following values are provided for both Table S8A and S8B
Uniprot Accession	Uniprot accession as provided in the listed studies
Gene name	Corresponding gene names retrieved from Uniprot KB (17th april 2019)
Protein name	Corresponding proteins names retrieved from Uniprot KB (17th april 2019)

## Sheet: Table S8A
Kessels et al. 2014 PlosOne			Singh et al. 2011 J Sep Sci			Rabinowitz et al. 2017 PNAS			Saxena et al. 2012 Mol Cell Proteomics
Uniprot Accession	Gene name	Protein name	Uniprot Accession	Gene name	Protein name	Uniprot Accession	Gene name	Protein name	Uniprot Accession	Gene name	Protein name
A5PMP6	c3b.1 c3b.2	Complement component c3b, tandem duplicate 1	B3DHC5	apoa4b.2 zgc:194131	Apolipoprotein A-IV b, tandem duplicate 2 (Zgc:194131)	E7FCU0	npm1a	Nucleophosmin 1a	Q7T3L3	hsp90b1 GP96 tra1	Chaperone protein GP96 (Heat shock protein 90, beta (Grp94), member 1)
B3DHC5	apoa4b.2 zgc:194131	Apolipoprotein A-IV b, tandem duplicate 2 (Zgc:194131)	Q9PTF3	nme3 NDPK-Z3 ndpkz3	Nucleoside diphosphate kinase (EC 2.7.4.6)	A0A0A0MPL4	stx7l	Syntaxin 7-like	A4FUP0	sult2st3	Sulfotransferase (EC 2.8.2.-)
F1R074	agrn	Agrin	Q5TZ29	apobb.1 apobl	Apolipoprotein Bb, tandem duplicate 1	A0A0B4J1A7			A5PN62	ddah2 si:dkey-46a12.1	Dimethylarginine dimethylaminohydrolase 2 (Si:dkey-46a12.1)
F1R5K7	hspg2	Heparan sulfate proteoglycan 2	Q7T3L3	hsp90b1 GP96 tra1	Chaperone protein GP96 (Heat shock protein 90, beta (Grp94), member 1)	E7EZS4			A7YT77	qdpra	Qdpra protein (Quinoid dihydropteridine reductase a)
Q5TZ29	apobb.1 apobl	Apolipoprotein Bb, tandem duplicate 1	A3FKT8	icn2 Icn2	Protein S100 (S100 calcium-binding protein)	Q1LVZ9	aox6	Aldehyde oxidase 6	B3DFP9	apoa2 zgc:193613	Apolipoprotein A-II (Zgc:193613)
A1L1V4	loxl2b si:dkeyp-32b1.1 zgc:158414	Lysyl oxidase homolog 2B (EC 1.4.3.13) (Lysyl oxidase-like protein 2B)	A3KPG5			H9GXR0			E7FE19	cnp	2',3'-cyclic nucleotide 3' phosphodiesterase
A2CEN1	efemp2a	EGF-containing fibulin extracellular matrix protein 2a	A4FUP0	sult2st3	Sulfotransferase (EC 2.8.2.-)	F1QD15	ptgfrn	Uncharacterized protein	F1Q986	hpdb	4-hydroxyphenylpyruvate dioxygenase
A2CEW3	fn1b	Fibronectin 1b	A5PMS9	ap1b1	AP complex subunit beta	F1R4Z8	gsta.1 gstal	Glutathione S-transferase, alpha tandem duplicate 1	F1R5A5	krt5	Keratin 5
A3KNP6	sfrp1b	Secreted frizzled-related protein 1b (Sfrp1b protein)	A5PMV7	ppp2r1ba ppp2r1a	Protein phosphatase 2, regulatory subunit A, beta a	F1QGH7			F1R3G8	srm	Spermidine synthase
A5WWI5	ahsg2	Alpha-2-HS-glycoprotein 2	A7E2K4	rplp2l	Ribosomal protein, large P2,-like (Rplp2l protein)	Q561U0	capn2l	Calpain 2, (M/II) large subunit, like	F1RDA6	ndufs1 ino80db	INO80 complex subunit D-B (NADH:ubiquinone oxidoreductase core subunit S1)
A9JRB3	htra1b zgc:172061	Serine protease HTRA1B (EC 3.4.21.-) (High-temperature requirement A serine peptidase 1B)	A9JRA9	zgc:172053	Zgc:172053 (Zgc:172053 protein)	Q1LWS2	hcls1 si:dkey-9a20.6	Hematopoietic cell-specific Lyn substrate 1	O73872	sod1 cuzn	Superoxide dismutase [Cu-Zn] (EC 1.15.1.1)
B0JZL7	enpp1 si:ch211-142e24.2	Ectonucleotide pyrophosphatase/phosphodiesterase 1 (Si:ch211-142e24.2 protein)	B0BLX4	zgc:175088	Zgc:175088 (Zgc:175088 protein)	Q7T306			Q1LXJ1	krt17 si:dkeyp-113d7.7	Keratin 17 (Si:dkeyp-113d7.7)
B0UXN0	qsox1 si:dkey-39n1.2	Sulfhydryl oxidase (EC 1.8.3.2)	B0S5C5	acaa2	Acetyl-CoA acyltransferase 2	Q803B5	dnpep zgc:55944	Aspartyl aminopeptidase (Zgc:55944)	Q1LXJ9	krtt1c19e	Keratin type 1 c19e
B3DFP9	apoa2 zgc:193613	Apolipoprotein A-II (Zgc:193613)	B0S6Z1	dhx9 si:ch211-194i4.1	DEAH (Asp-Glu-Ala-His) box helicase 9	A5PN03	edc4	Enhancer of mRNA-decapping protein 4	Q1LYC9	capns1a	Calpain, small subunit 1 a
B3DJG2	pcolceb LOC794872	Procollagen C-endopeptidase enhancer b (Similar to procollagen C-endopeptidase enhancer)	B0UYN4	zgc:162944	Zgc:162944	F1QNK8	hyi	Putative hydroxypyruvate isomerase (EC 5.3.1.22)	Q5U3E4	sugt1 sgut1 zgc:103668	SGT1 homolog, MIS12 kinetochore complex assembly cochaperone (Zgc:103668) (Zgc:103668 protein)
B8JHU4	actn1	Actinin, alpha 1 (Actn1 isoform b)	B0V1K4	zgc:136930	Zgc:136930	F1QJ44			Q5XJE1	cutc	CutC copper transporter homolog (E. coli)
B8JKW4	c3a.1 si:dkey-76b14.4	Complement component c3a, duplicate 1	B3DFP9	apoa2 zgc:193613	Apolipoprotein A-II (Zgc:193613)	Q6NWJ8	ugp2b zgc:85662	UTP--glucose-1-phosphate uridylyltransferase (EC 2.7.7.9)	Q6AZC1	psmc5 wu:fa14g03 wu:fb23a11 zgc:92464	Proteasome (Prosome, macropain) 26S subunit, ATPase, 5 (Proteasome 26S subunit, ATPase 5) (Psmc5 protein)
B8JL29	hmgb2a hmgb2	High mobility group box 2a	B3DFQ1	capns1b	Calpain, small subunit 1 b (Capns1b protein)	Q5SPP2	snx9b snx9l	Sorting nexin	Q6DC81	nutf2l nutf2	Nuclear transport factor 2 (Nuclear transport factor 2,-like)
B8JL43	tfa	Serotransferrin	B3DG31	si:rp71-45k5.4	Proteasome subunit alpha type (EC 3.4.25.1)	Q6PC01	faua fau	40S ribosomal protein S30	Q6GMI7	enoph1 masa zgc:91991	Enolase-phosphatase E1 (EC 3.1.3.77) (2,3-diketo-5-methylthio-1-phosphopentane phosphatase) (MASA homolog)
B8JLZ3	anxa1b	Annexin	B7ZD09	slka slkn	STE20-like kinase a	F2Z4T4	akap12b	A kinase (PRKA) anchor protein 12b	Q6NWF6	krt8 krt2-8	Keratin, type II cytoskeletal 8 (Cytokeratin-8) (CK-8) (Keratin-8) (K8)
B8XY56	rnaset2 dre2 zgc:113369	Ribonuclease T2 (EC 3.1.27.-) (RNase Dre2)	B8A516	tuba1b	Tubulin alpha chain	F6PBQ1	dhrs13a.1	Dehydrogenase/reductase (SDR family) member 13a, tandem duplicate 1	Q6NWJ5	tuba8l4	Tubulin alpha chain
D6MUD3	col11a1b COL11A1b	Collagen type XI alpha-1b (Collagen, type XI, alpha 1b)	B8A5L6	fga	Fibrinogen alpha chain	Q6NV37	gyg1a gyg1	Glycogenin 1 (Glycogenin 1a) (Gyg1 protein)	Q6P2V4	hgd	Hgd protein (Homogentisate 1,2-dioxygenase)
E7F1S4	thbs2b	Thrombospondin 2b	B8JHU4	actn1	Actinin, alpha 1 (Actn1 isoform b)	E7F3X7	kdm3b	Lysine (K)-specific demethylase 3B	Q6P3L0	mvp	Major vault protein (MVP)
E7F5I3	postna	Periostin, osteoblast-specific factor a	B8JIS5	gstm.3 gstm3	Glutathione S-transferase mu tandem duplicate 3	Q6IQI2	lgals2a lgals1l2	Galectin	Q6P3L3	hspa5	Heat shock protein 5 (Immunoglobulin binding protein)
E7F6D3			B8JIS8	gstm.1 gstm	Glutathione S-transferase mu, tandem duplicate 1	F1QF86	ppp3ccb	Serine/threonine-protein phosphatase (EC 3.1.3.16)	Q6P5M2	wdr61 zgc:77675	WD repeat-containing protein 61
E7F8X0	srpx2 si:ch73-137d5.1	Sushi-repeat-containing protein X-linked 2	B8JL43	tfa	Serotransferrin	F1RA14			Q6P972	tuba2	Tubulin alpha chain
E7FAN5	f2	Coagulation factor II (thrombin)	B8JLZ3	anxa1b	Annexin	F1QYU7	mat2aa MAT2AA	S-adenosylmethionine synthase (EC 2.5.1.6)	Q6PC90	rps12	40S ribosomal protein S12
E7FB76	col21a1	Collagen, type XXI, alpha 1	B8JM11	epcam	Epithelial cell adhesion molecule	B7ZDE9	htt	Huntingtin	Q6PHG2	hpx	Hemopexin
E7FBD3	apoba	Apolipoprotein Ba	Q5XJ62	myl6 zgc:103624	Myosin, light chain 6, alkali, smooth muscle and non-muscle (Zgc:103624)	B3DHC5	apoa4b.2 zgc:194131	Apolipoprotein A-IV b, tandem duplicate 2 (Zgc:194131)	Q6ZM17	si:ch211-5k11.8 OTTDARP00000002008 si:xx-by187g17.1 bY187G17.1-001	Novel protein similar to zebrafish hemoglobin alpha-adult 1 (Hbaa1) (Si:ch211-5k11.8) (Si:xx-by187g17.1)
E7FCV2	c5	Complement component 5	Q6TNS5	MLC3SM zgc:153867	Myosin light chain alkali, smooth-muscle isoform (Zgc:153867) (Zgc:153867 protein)	A5PMP1	capn1b si:dkeyp-101g1.3	Calpain 1, (mu/I) large subunit b	Q7SYH6	pah DKEY-264K15.3-001	Pah (Phenylalanine hydroxylase)
E7FCV8	col6a2	Collagen, type VI, alpha 2	O42363	apoa1 apoa zgc:103718	Apolipoprotein A-I (Apo-AI) (ApoA-I) (Apolipoprotein A1) [Cleaved into: Proapolipoprotein A-I (ProapoA-I)]	Q7ZVA3	sh3gl1b	SH3-domain GRB2-like 1b (Sh3gl1b protein)	Q7SZQ6	arhgdig	Rho GDP dissociation inhibitor (GDI) gamma
E7FE47	col5a2b	Collagen, type V, alpha 2b	O57521	hsp90ab1 hsp90b	Heat shock protein HSP 90-beta	F1QCQ7	stom	Stomatin	Q7ZUD3	gmfb	Glia maturation factor, beta (Gmfb protein)
E7FE90	fetub	Fetuin B	O73872	sod1 cuzn	Superoxide dismutase [Cu-Zn] (EC 1.15.1.1)	Z4YHX5	prpf18	Pre-mRNA-splicing factor 18	Q7ZVI7	actba bact bactin1 bactzf	Actin, cytoplasmic 1 (Beta-actin-1) [Cleaved into: Actin, cytoplasmic 1, N-terminally processed]
E7FG81	col12a1b si:ch211-106k22.1	Collagen, type XII, alpha 1b	P62084	rps7 zgc:73216	40S ribosomal protein S7	Q1LXR3	rrbp1b rrbp1	Ribosome-binding protein 1b	Q90486	ba1 si:by187g17.2 zgc:123164; ba1l si:by187g17.4	Hemoglobin subunit beta-1 (Beta-1-globin) (Beta-A1-globin) (Hemoglobin beta-1 chain)
E9QEQ1	apoc2	Apolipoprotein C-II	P79735	ran	GTP-binding nuclear protein Ran (GTPase Ran) (Ras-related nuclear protein)	Q7ZTS0	bco1 bcmo1 bcmo1a	Beta-carotene 15,15'-monooxygenase 1 (Beta-carotene oxygenase 1)	Q90487	hbaa1	Hemoglobin subunit alpha (Alpha-globin aa1) (Hemoglobin alpha chain)
F1Q4X1	col6a3	Collagen, type VI, alpha 3	Q1L907	gstr gstR1 gstr1 tfa	Glutathione S-transferase rho (Gstr1 protein) (Rho-class glutathione S-transferase)	I3IT87	ap2m1b	AP-2 complex subunit mu-B	Q9PVK4	ldhba ldhb si:dkey-13i19.5	L-lactate dehydrogenase B-A chain (LDH-B-A) (EC 1.1.1.27)
F1Q6P3	col6a1	Collagen, type VI, alpha 1	Q1LVD7	efhd2 si:dkey-72l14.9	EF-hand domain family, member D2 (Si:dkey-72l14.9) (Si:dkey-72l14.9 protein)	Q6NYE6	cyb5r3	NADH-cytochrome b5 reductase (EC 1.6.2.2)	F1QEW2	si:dkey-183i3.5	Si:dkey-183i3.5
F1Q775	cilp	Cartilage intermediate layer protein, nucleotide pyrophosphohydrolase	Q1LWH1	rps16 si:dkey-66d18.1	Ribosomal protein S16 (Rps16 protein)	Q5RGA7	bpnt1	Bisphosphate nucleotidase 1	E7EXC4
F1Q7R2	chad	Chondroadherin	Q1LXJ1	krt17 si:dkeyp-113d7.7	Keratin 17 (Si:dkeyp-113d7.7)	Q1RLQ1	stmn1a stmn1	Stathmin	E9QEA9	nqo1	NAD(P)H dehydrogenase, quinone 1 (Fragment)
F1Q8A0	ctsk	Cathepsin K	Q1LYC9	capns1a	Calpain, small subunit 1 a	F1QUA3	tln2a tln2	Talin 2a	E9QBP0	arhgdig	Rho GDP dissociation inhibitor (GDI) gamma (Fragment)
F1Q924	col6a4a col6a6	Collagen, type VI, alpha 4a (Fragment)	Q1RLR3	krt93 zgc:136902	Keratin 93 (Zgc:136902)	F1QA07	arhgef7b	Rho guanine nucleotide exchange factor (GEF) 7b
F1QBE9	ccl25b	Chemokine (C-C motif) ligand 25b	Q4V918	psma3 zgc:114044	Proteasome subunit alpha type (EC 3.4.25.1)	Q0E671	cmasa cmas cmas1	N-acylneuraminate cytidylyltransferase A (EC 2.7.7.43) (CMP-sialic acid synthetase 1)
F1QC76	mmp9	Matrix metallopeptidase 9	Q566W6	cirbpa zgc:112425	Cold-inducible RNA-binding protein a (Zgc:112425) (Zgc:112425 protein)	F1R074	agrn	Agrin
F1QDL1	col1a1b	Collagen, type I, alpha 1b	Q5PRD0	ywhaba ywhab1 wu:fb80c08	14-3-3 protein beta/alpha-A	Q568N7
F1QEE7	thbs1b	Thrombospondin 1b	Q5RG12	hsp90aa1.2 hsp90a.2	Heat shock protein 90, alpha (cytosolic), class A member 1, tandem duplicate 2 (Heat shock protein 90-alpha 2)	Q6IQK3	vamp3	Vesicle-associated membrane protein 3 (Cellubrevin)
F1QIJ3	lamc2	Laminin, gamma 2	Q5RG82	ivns1abpa si:dkeyp-11g8.1	Influenza virus NS1A-binding protein homolog A (NS1-BP homolog A) (NS1-binding protein homolog A)	Q5RGI2	nup107	Nuclear pore complex protein
F1QJC9	col1a1a	Collagen, type I, alpha 1a	Q5SPJ1	serpina1l	Serine (or cysteine) proteinase inhibitor, clade A (alpha-1 antiproteinase, antitrypsin), member 1,-like	Q6NX09
F1QKE8	col6a3	Collagen, type VI, alpha 3 (Fragment)	Q5U3E4	sugt1 sgut1 zgc:103668	SGT1 homolog, MIS12 kinetochore complex assembly cochaperone (Zgc:103668) (Zgc:103668 protein)	F1QHE9	ndufs7	NADH:ubiquinone oxidoreductase core subunit S7
F1QKL1	thbs3a	Thrombospondin-3a	Q642H9	rps4x rps4 zgc:92076	40S ribosomal protein S4, X isoform	F1RBW3
F1QKW3	lama5	Laminin, alpha 5	Q66L49	slc25a24 scamc1 si:ch211-63o20.9 zgc:92470	Calcium-binding mitochondrial carrier protein SCaMC-1 (Small calcium-binding mitochondrial carrier protein 1) (Solute carrier family 25 member 24)	F1R1U9	si:dkey-21e2.13	Si:dkey-21e2.13 (Fragment)
F1QLC3	f10	Coagulation factor X	Q68EH2	ak1 AK1 zgc:91930	Adenylate kinase isoenzyme 1 (AK 1) (EC 2.7.4.3) (EC 2.7.4.6) (ATP-AMP transphosphorylase 1) (ATP:AMP phosphotransferase) (Adenylate monophosphate kinase) (Myokinase)	Q1LVI0	gatad2ab gatad2a	GATA zinc finger domain-containing 2Ab
F1QP85			Q6DFZ8	capn2l zgc:92480	Zgc:92480	F1QZD3	uap1	UDP-N-acetylglucosamine pyrophosphorylase 1
F1QSF1	mfap2	Microfibril-associated protein 2	Q6DG22	ada	Adenosine deaminase (EC 3.5.4.4) (Adenosine aminohydrolase)	E9QC46	cast	Calpastatin
F1QW52	habp2	Hyaluronan-binding protein 2	Q6DGJ6	prdx2 prdx1	Peroxiredoxin 2	F1R3Q3	sept6	Septin 6
F1QX13	c3a.3 c3c	Complement component c3a, duplicate 3	Q6DGV5	rab10 zgc:92757	RAB10, member RAS oncogene family (Zgc:92757)	Q1L881
F1QXC6	tgfb5 tgfb2l	Transforming growth factor beta	Q6DGX8	psma1 zgc:92726	Proteasome subunit alpha type (EC 3.4.25.1)	Q7ZYX4
F1QXD5	col10a1a	Collagen, type X, alpha 1a	Q6DHI9	psmb2	Proteasome subunit beta (EC 3.4.25.1)	F1R417	rock2b	Rho-associated protein kinase (EC 2.7.11.1)
F1QY29	prelp	Proline/arginine-rich end leucine-rich repeat protein	Q6DHS3	rpl15	Ribosomal protein L15	Q6ZM60	atp2a2b	Calcium-transporting ATPase (EC 7.2.2.10)
F1QYE2			Q6DHU3	krt97 zgc:92061	Keratin 97 (Zgc:92061)	F1QC13	pacsin2	Protein kinase C and casein kinase substrate in neurons 2
F1QYU0	lama4	Laminin, alpha 4	Q6DRC0	sars	Serine--tRNA ligase, cytoplasmic (EC 6.1.1.11) (Seryl-tRNA synthetase) (SerRS)	F1QCV2	hdac10	Polyamine deacetylase HDAC10 (EC 3.5.1.48) (EC 3.5.1.62) (Histone deacetylase 10)
F1QZU6	prozb	Protein Z, vitamin K-dependent plasma glycoprotein b	Q6DRF3	psmb1	Proteasome subunit beta (EC 3.4.25.1)	F1R617	myo1b myo1bl2	Myosin IB
F1R0N0	lrrc17	Leucine-rich repeat-containing 17	Q6IQJ2	zgc:55461	Tubulin beta chain	F1QYF0	tbl3	Transducin (beta)-like 3
F1R1P9	thbs4b	Thrombospondin-4-B	Q6IQV0	zgc:86598	Zgc:86598	E7F290	si:ch211-222l21.1	Si:ch211-222l21.1
F1R2S9	ecm2	Extracellular matrix protein 2, female organ and adipocyte-specific	Q6J0N1	rnf114 znf313	Ring finger protein 114 (ZFP313 protein)	E9QHT1	zgc:100868	Zgc:100868
F1R2W1	dhrs13a.3 dhrs13	Dehydrogenase/reductase (SDR family) member 13a, duplicate 3	Q6NUZ3	syncrip	Synaptotagmin-binding, cytoplasmic RNA-interacting protein	Q9PTF3	nme3 NDPK-Z3 ndpkz3	Nucleoside diphosphate kinase (EC 2.7.4.6)
F1R4X4			Q6NW90	tubb5 Tubb5	Tubulin beta chain	A2BFY7	purba si:dkey-202n14.1	Purine-rich element-binding protein Ba (Si:dkey-202n14.1)
F1R6G3	lum	Lumican (Fragment)	Q6NWC3	rps2	Ribosomal protein S2	B3DKP3	ogt.1 ogt	O-linked N-acetylglucosamine (GlcNAc) transferase (UDP-N-acetylglucosamine:polypeptide-N-acetylglucosaminyl transferase) (O-linked N-acetylglucosamine (GlcNAc) transferase, tandem duplicate 1)
F1R6R2	si:ch211-270n8.1	Si:ch211-270n8.1 (Fragment)	Q6NWK1	capza1a capza1	F-actin-capping protein subunit alpha	Q6P948	pdha1a pdha1	Pyruvate dehydrogenase E1 component subunit alpha (EC 1.2.4.1)
F1R886	cfb	Complement factor B	Q6NY31	prkab1b prkab1	Protein kinase, AMP-activated, beta 1 non-catalytic subunit, b	F1QVR2
F1R8L1	fgfbp2a fgfbp2	Fibroblast growth factor-binding protein 2a	Q6NYU8	hnrnpaba hnrnpab hnrpab	Heterogeneous nuclear ribonucleoprotein A/B (Heterogeneous nuclear ribonucleoprotein A/Ba)	Q803E3	ewsr1b	EWS RNA-binding protein 1b (Ewing sarcoma breakpoint region 1b)
F1R9P5			Q6P0I2	psma8 zgc:77139	Proteasome subunit alpha type (EC 3.4.25.1)	B8A4B0
F1R9Y1	col14a1a col14a1	Collagen, type XIV, alpha 1a	Q6P0V8	anxa5b	Annexin	Q4V9P8	camk2g1 camk2ga	Calcium/calmodulin-dependent protein kinase (CaM kinase) II gamma 1
F1RAG3	nid1a	Nidogen 1a	Q6P102	ywhabl	Tyrosine 3-monooxygenase/tryptophan 5-monooxygenase activation protein, beta polypeptide-like	Q503Z0	tpd52l1 zgc:110003	Tpd52-like 1 (Zgc:110003) (Zgc:110003 protein)
F1RAP6	serpinf2b	Serpin peptidase inhibitor, clade F (alpha-2 antiplasmin, pigment epithelium-derived factor), member 2b	Q6P2T5	arpc2	Arp2/3 complex 34 kDa subunit	F1R6C8
F1RDU8	si:dkey-65b12.6	Si:dkey-65b12.6	Q6P3J7	ehd2b ehd2	EH-domain containing 2 (EH-domain-containing 2b)	E7FD66
F1REL9	lamb1b	Laminin, beta 1b	Q6P3L9	glud1b	Glutamate dehydrogenase 1 (Glutamate dehydrogenase 1b)	F1QHW0	cyp20a1	Cytochrome P450, family 20, subfamily A, polypeptide 1
F1REM3	bmp1a	Metalloendopeptidase (EC 3.4.24.-)	Q6P5K3	rplp0	60S acidic ribosomal protein P0	E7F9X9
F2Z4S3	tcn2 si:ch211-102c2.6	Transcobalamin II	Q6P5K5	rplp1	Ribosomal protein, large, P1	Q7ZVR3	ppp1cab zgc:76940	Serine/threonine-protein phosphatase (EC 3.1.3.16)
O42364	apoeb apoe	Apolipoprotein Eb (Apo-Eb)	Q6P696	glo1	Lactoylglutathione lyase (EC 4.4.1.5) (Glyoxalase I)	F1RDC5	xpo7	Exportin 7
Q1L8P0	crtap	Cartilage-associated protein	Q6P6F0	rps17 zgc:77702	Ribosomal protein S17 (Zgc:77702)	F1QR34
Q1LUC6	tinagl1 si:dkey-158b13.1	Tubulointerstitial nephritis antigen-like 1	Q6P969	eef1a1a zgc:73138	Elongation factor 1-alpha	F1Q8Z1	dock7	Dedicator of cytokinesis 7
Q1LUV0	si:ch211-262h13.5	Si:ch211-262h13.5	Q6P972	tuba2	Tubulin alpha chain	Q7T1D7	fmo5	Dimethylaniline monooxygenase [N-oxide-forming] (EC 1.14.13.8)
Q1LV51	ogna ogn	Osteoglycin, paralog a	Q6PC12	eno1a eno1	Enolase 1, (Alpha) (Enolase 1a, (alpha))	F1R9P3	ttc38	Tetratricopeptide repeat protein 38 (Fragment)
Q1LVF0	lamc1	Laminin subunit gamma-1	Q6PC29	ywhag1 ywhag zgc:73131	14-3-3 protein gamma-1	F1R5K7	hspg2	Heparan sulfate proteoglycan 2
Q1LXA7	aspn	Asporin	Q6PC53	ppiab ppial	Peptidyl-prolyl cis-trans isomerase (PPIase) (EC 5.2.1.8)	Q7T2P8
Q1LXE1	hapln1a	Hyaluronan and proteoglycan link protein 1a	Q6PC90	rps12	40S ribosomal protein S12	Q3B752	dtymk zgc:123174	Deoxythymidylate kinase (thymidylate kinase) (Zgc:123174)
Q1LYJ7	kng1	Kininogen 1	Q6PE34	zgc:65894	Tubulin beta chain	E9QIK2	mdka	Midkine a (Fragment)
Q1RLX2	timp2a timp2	TIMP metallopeptidase inhibitor 2a (Timp2 protein) (Tissue inhibitor of metalloproteinase 2)	Q6PFT7	cotl1 COTL1	Coactosin-like 1 (Coactosin-like 1 (Dictyostelium)) (Coactosin-like F-actin-binding protein 1) (Cotl1 protein)	E7FGK1	eml3	EMAP-like 3
Q24JW2	lyz	Lysozyme	Q6PGX4	hsc70 zgc:63663	Heat shock cognate 70 (Zgc:63663)	F1RA88	adam10a	ADAM metallopeptidase domain 10a
Q29RB4	olfml3a olfml3 zgc:153815	Olfactomedin-like protein 3A	Q6PHG2	hpx	Hemopexin	F1QX56
Q29RF0	dpt DPT zgc:136613	Dermatopontin (Zgc:136613 protein)	Q6PHJ8	myl12.1 myl9l	Myosin, light chain 12, genome duplicate 1 (Myosin, light polypeptide 9, like)	F1QM39	uacab	Uveal autoantigen with coiled-coil domains and ankyrin repeats b
Q2PMI2	fstl1b	Follistatin-like 1b (Follistatin-like 2)	Q6PI20	h3f3a zgc:56193 zgc:86731; h3f3b.1 zgc:110292; h3f3c zgc:64222; h3f3d zgc:56418	Histone H3.3	Q6P1S3	xpnpep1	X-prolyl aminopeptidase (Aminopeptidase P) 1, Soluble
Q503V2	apoea zgc:110064	Apolipoprotein Ea (Zgc:110064)	Q6PI52	calm1a zgc:63926; calm1b; calm2a calm2d; calm2b zgc:64036; calm3a calm2g zgc:86728; calm3b zgc:76987	Calmodulin (CaM)	Q5RIE1	eif2b4	Eukaryotic translation initiation factor 2B, subunit 4 delta
Q5F0G5	myoc	Myocilin	Q6TGV6	psma5 PSMA5	Proteasome subunit alpha type (EC 3.4.25.1)	B0S6M2	ipo11	Importin 11
Q5RI45	dcn	Decorin (Bone proteoglycan II)	Q6TH14	eno3 ENO1	Enolase 1, (Alpha) (Enolase 3, (beta, muscle))	B3DGV1	stat6	Signal transducer and activator of transcription
Q5RIH8	serpina10a	Serpin peptidase inhibitor, clade A (alpha-1 antiproteinase, antitrypsin), member 10a	Q6TH32	cfl1 CFL2 cfl2l	Cofilin 1 (Muscle cofilin 2)	Q8AW60	ivd OTTDARP00000001747 dZ181P14.1-001	Isovaleryl Coenzyme A dehydrogenase (Isovaleryl-CoA dehydrogenase) (Novel protein similar to human isovaleryl Coenzyme A dehydrogenase (IVD))
Q5SPR2	clu	Clusterin	Q6TNP9	tuba8l TUBA2 DKEYP-53E12.1-001	Tubulin alpha chain	E9QJ40	fam120c	Family with sequence similarity 120C
Q66I20	serpinf1 zgc:92072	Serpin peptidase inhibitor, clade F (alpha-2 antiplasmin, pigment epithelium-derived factor), member 1 (Zgc:92072)	Q6XG62	icn	Protein S100 (S100 calcium-binding protein)	Q90ZZ7
Q66I23	tgfb3	Transforming growth factor beta	Q6YLH9	cav1 CAV1	Caveolin	F1R0W9	dctn1a	Dynactin 1a
Q66IB6	hmgb2b hmgb2 hmgb2l	High mobility group box 2b (High-mobility group box 2) (Hmgb2 protein)	Q6ZM17	si:ch211-5k11.8 OTTDARP00000002008 si:xx-by187g17.1 bY187G17.1-001	Novel protein similar to zebrafish hemoglobin alpha-adult 1 (Hbaa1) (Si:ch211-5k11.8) (Si:xx-by187g17.1)	E7FCE3	grhl1	Grainyhead-like transcription factor 1
Q6DG10	mmp2	Matrix metallopeptidase 2 (Matrix metalloproteinase 2)	Q75U66	postnb PN postn	Periostin (Periostin, osteoblast specific factor) (Periostin, osteoblast-specific factor b)	Q5TZ29	apobb.1 apobl	Apolipoprotein Bb, tandem duplicate 1
Q6GMI0	htra1a htra1 prss11 zgc:92029	Serine protease HTRA1A (EC 3.4.21.-) (High-temperature requirement A serine peptidase 1A) (Serine protease 11)	Q7SXN2	hnrnpdl hnrpdl	Heterogeneous nuclear ribonucleoprotein D-like	E9QJI4
Q6GMI5	bgna bgn	Biglycan	Q7SXP1	capzb	F-actin-capping protein subunit beta	Q7T3L3	hsp90b1 GP96 tra1	Chaperone protein GP96 (Heat shock protein 90, beta (Grp94), member 1)
Q6NYE1	fgb	Fibrinogen beta chain (Fibrinogen, B beta polypeptide)	Q7SXU7	ddx39b bat1 CH211-152P11.1-001	DEAD (Asp-Glu-Ala-Asp) box polypeptide 39B (HLA-B associated transcript 1)	F1R966	cltca	Clathrin heavy chain
Q6NYR4			Q7SXW1	tpm4b zgc:63734	Tropomyosin 4b (Zgc:63734)	Q5RH29	itih2	Inter-alpha-trypsin inhibitor heavy chain 2
Q6NYT8	loxa lox	Lysyl oxidase (Lysyl oxidase a)	Q7SZQ6	arhgdig	Rho GDP dissociation inhibitor (GDI) gamma	E7EXW8	glg1a	Golgi glycoprotein 1a
Q6P0V8	anxa5b	Annexin	Q7T1D8	phb	Phb (Phb protein) (Prohibitin)	A0JME6	isoc2 zgc:109735	Isochorismatase domain-containing protein 2
Q6PC07	rbp4l purpurin	Purpurin (Rbp4l) (Retinol-binding protein 4,-like)	Q7T334	mdh2 zgc:64133	Malate dehydrogenase (EC 1.1.1.37)	A0JMN4	csk	Tyrosine-protein kinase (EC 2.7.10.2)
Q6PVV8	sparc	SPARC (Secreted protein, acidic, cysteine-rich (osteonectin))	Q7T356	ywhabb ywhab ywhab2 zgc:64092	14-3-3 protein beta/alpha-B	F1QFA6	cnot1	CCR4-NOT transcription complex subunit 1
Q75U66	postnb PN postn	Periostin (Periostin, osteoblast specific factor) (Periostin, osteoblast-specific factor b)	Q7T368	pdhb	Pyruvate dehydrogenase (Lipoamide) beta (Pyruvate dehydrogenase E1 beta subunit)	A1A5X4	add1	adducin 1 (Alpha)
Q7T2K9	sfrp1a sfrp1	Secreted frizzled-related protein 1 (Secreted frizzled-related protein 1a) (Sfrp1a)	Q7T3H5	gpd1c gpd1	Glycerol-3-phosphate dehydrogenase [NAD(+)] (EC 1.1.1.8)	A1A5X7	taf15 zgc:158363	TAF15 RNA polymerase II, TATA box-binding protein (TBP)-associated factor (Zgc:158363)
Q7ZVG7			Q7ZTS4	krt18 dapk1	Keratin, type I cytoskeletal 18 (Cytokeratin-18) (CK-18) (Dorsal aorta proneprin kinesin-1) (DreK18) (Keratin-18) (K18)	A1A5Y1	mgst3b zgc:158387	Microsomal glutathione S-transferase 3b (Zgc:158387)
Q7ZVL5	serpine2	Serine (Or cysteine) proteinase inhibitor, clade E (Nexin, plasminogen activator inhibitor type 1), member 2 (Serpin peptidase inhibitor, clade E (nexin, plasminogen activator inhibitor type 1), member 2) (Serpine2 protein)	Q7ZTS8	elavl1a elavl1	ELAV-like protein	A1A5Y7	hmgn7 zgc:158409	High mobility group nucleosomal-binding domain 7 (Zgc:158409)
Q803H7	itm2ba itm2b	Integral membrane protein 2Ba (Itm2ba protein)	Q7ZU48	hnrnpa0l hnrpa0l	Heterogeneous nuclear ribonucleoprotein A0,-like (Hnrpa0l protein)	A1A605	ybx1	Y-box-binding protein 1
Q804H0	anxa1c	Annexin	Q7ZU99	vcp cdc48 si:ch211-113n10.2	Transitional endoplasmic reticulum ATPase (TER ATPase) (EC 3.6.4.6) (Protein CDC48) (Valosin-containing protein) (VCP)	A1L1G1	esrp1 rbm35a zgc:154050	Epithelial splicing regulatory protein 1 (RNA-binding motif protein 35A) (RNA-binding protein 35A)
Q804H2	anxa1a	Annexin	Q7ZUJ8	psmb3	Proteasome subunit beta (EC 3.4.25.1)	A1L1T1	fam129ba fam129b zgc:158319	Family with sequence similarity 129 member Ba (Zgc:158319)
Q8QGV5	ptgdsb.1 ptgds ptgdsb	Lipocalin-type prostaglandin D synthase-like protein (Prostaglandin D2 synthase b, tandem duplicate 1) (Ptgds protein)	Q7ZUQ1	cdc42l	Cdc42l protein (Cell division cycle 42,-like) (Ras-like protein Cdc42c)	A1L1V1	fnta zgc:158397	Farnesyltransferase, CAAX box, alpha (Zgc:158397)
F1QQE4	slit2	Slit homolog 2 (Drosophila)	Q7ZUV5	rab1ba zgc:56049	ZRAB1B, member RAS oncogene family a (Zgc:56049) (Zgc:56049 protein)	A1XF92	crtac1a CRTAC-2 crtac1	Cartilage acidic protein 1a (Cartilage acidic protein 2)
F1QJB3	si:ch1073-280e3.1	Si:ch1073-280e3.1	Q7ZUW5	rab5aa rab5a	RAB5A, member RAS oncogene family (RAB5A, member RAS oncogene family, a) (Rab5a protein)	A2AR65	rca2.1	Regulator of complement activation group 2 gene 1
F1QLH9			Q7ZV22	mtap zgc:66012	S-methyl-5'-thioadenosine phosphorylase (EC 2.4.2.28) (5'-methylthioadenosine phosphorylase) (MTA phosphorylase) (MTAP) (MTAPase)	A2AR68	gdi1	Rab GDP dissociation inhibitor
Q9W767	mdka mdk1 plei1	Midkine a (Midkine-related growth factor) (Midkine-related growth factor Mdk1) (Pleiotrophin 1)	Q7ZV55	eif3i eif3s2	Eukaryotic translation initiation factor 3 subunit I (eIF3i) (Eukaryotic translation initiation factor 3 subunit 2) (eIF-3-beta) (eIF3 p36)	A2ARG7	atp5meb atp5ib	ATP synthase membrane subunit eb
B0UXF7	col4a5	Collagen, type IV, alpha 5 (Alport syndrome)	Q7ZV77	psma4	Proteasome subunit alpha type (EC 3.4.25.1)	A2AWA1	ddx39aa	DEAD (Asp-Glu-Ala-Asp) box polypeptide 39Aa
A0JML7	adpgk	ADP-dependent glucokinase	Q7ZVA4	s100a10b	Protein S100 (S100 calcium-binding protein)	A2AWE1
A8KC28	proca proc	Proc protein (Protein C (inactivator of coagulation factors Va and VIIIa), a)	Q7ZVI7	actba bact bactin1 bactzf	Actin, cytoplasmic 1 (Beta-actin-1) [Cleaved into: Actin, cytoplasmic 1, N-terminally processed]	A2BE49	ppm1f	Protein phosphatase, Mg2+/Mn2+-dependent, 1F
B0S6K5	tnn tnw DKEY-4I23.1-001	Tenascin N (Tenascin W)	Q7ZVK8	mapk3	Mitogen-activated protein kinase (EC 2.7.11.24)	A2BEN1	atp6v1aa atp6v1al	ATPase H+-transporting V1 subunit Aa
E7F829	aebp1 si:dkey-24n17.4	AE-binding protein 1	Q7ZW04			A2BF91	zgc:101858	Zgc:101858
F1Q5B5	alpl alp	Alkaline phosphatase (EC 3.1.3.1)	Q7ZW09	hnrnpl hnrpl zgc:55429	Heterogeneous nuclear ribonucleoprotein L (Zgc:55429) (Zgc:55429 protein)	A2BFD8	thy1	Thy-1 cell surface antigen
E9QDI1	apoc1 apoc1l	Apolipoprotein C-I	Q7ZW20	ywhae1	Tyrosine 3-monooxygenase/tryptophan 5-monooxygenase activation protein, epsilon polypeptide 1 (Ywhae1 protein)	A2BFT4	ftr82	FinTRIM family, member 82
F1Q593			Q7ZWD8	cfl1l CFL1 cfl1	Cfl1 protein (Cofilin 1 (non-muscle),-like) (Non-muscle cofilin 1)	A2BGN0	mmab si:dkey-189p24.5	Metabolism of cobalamin-associated B
F1QG79	col4a1	Collagen, type IV, alpha 1	Q801E6	mdh1aa MDH1 mdh1a mdhA	Malate dehydrogenase (EC 1.1.1.37)	A2BGQ1	dhfr	Dihydrofolate reductase
F1QKX8	lamb2l	Laminin, beta 2-like (Fragment)	Q802C9	eif4a1a	Eukaryotic translation initiation factor 4A, isoform 1A (Eukaryotic translation initiation factor 4A1A)	A2BGR9	aldh2.1	Aldehyde dehydrogenase 2 family member, tandem duplicate 1
F1RAC0	si:ch1073-459j12.1	Si:ch1073-459j12.1	Q803B0	hspd1	Heat shock 60 protein 1 (Heat shock 60kD protein 1 (Chaperonin)) (Hspd1 protein)	A2BHA3	ckma	Creatine kinase, muscle a
A2RUX5	col11a1a col11a1 zgc:158335	Collagen, type XI, alpha 1a (Zgc:158335 protein)	Q803F6	rpsa lamr1	40S ribosomal protein SA (37 kDa laminin receptor precursor) (37LRP) (37/67 kDa laminin receptor) (LRP/LR) (67 kDa laminin receptor) (67LR) (Laminin receptor 1) (LamR) (Laminin-binding protein precursor p40) (LBP/p40)	A2BHD8	hexb hexa DKEY-35I22.2-001	Beta-hexosaminidase (EC 3.2.1.52)
F1QBB3			Q803H5	gnb1b gnb1l	Gnb1l protein (Guanine nucleotide binding protein (G protein), beta polypeptide 1, like) (Guanine nucleotide-binding protein (G protein), beta polypeptide 1b)	A2BHN0	anxa3a	Annexin
F1R6B9			Q803M1	tpm3	Tropomyosin 3	A2BIH6	lrrc8da	Leucine-rich repeat-containing 8 VRAC subunit Da
Q5NJJ5	matn4	Matrilin-4	Q803M8	ywhaqb ywhaq1 ywhaz	Tryosine 3-monooxygenase/tryptophan 5-monooxygenase activation protein, zeta polypeptide (Tyrosine 3-monooxygenase/tryptophan 5-monooxygenase activation protein, theta polypeptide b)	A2BIM7	tars	Threonyl-tRNA synthetase
A8E5G1	anxa2b	Annexin	Q803Q7	aldoaa aldoa	Fructose-bisphosphate aldolase (EC 4.1.2.13)	A2BIN5	mccc2	Methylcrotonoyl-CoA carboxylase 2 (beta)
E9QCG6			Q803T5	ahcy AHCY	Adenosylhomocysteinase (EC 3.3.1.1)	A2BIN8	nos2a	Nitric oxide synthase (EC 1.14.13.39)
Q6IQP3	calua si:ch211-266a5.5	Calumenin-A	Q803U6	aqp3a aqp3	Aqp3 protein (Aquaporin 3) (Aquaporin-3a)	A2CE73	khdrbs1a	KH domain-containing, RNA-binding, signal transduction-associated 1a
B8JLG2	proca	Protein C (inactivator of coagulation factors Va and VIIIa), a	Q804G3	anxa11b	Annexin	A2CE76	upk3b upk3l	Uroplakin 3b
F1QFH8	apom	Apolipoprotein M (Fragment)	Q804G7	anxa4	Annexin	A2CEM4	atl3	Atlastin 3
Q6NXA5	pon2 zgc:77556	Paraoxonase 2 (Zgc:77556)	Q804H2	anxa1a	Annexin	A2CEW4	atic	5-aminoimidazole-4-carboxamide ribonucleotide formyltransferase/IMP cyclohydrolase
E7FDM6			Q8AWD0	vdac2	Vdac2 protein (Voltage-dependent anion channel 2)	A2CEY7	si:dkey-251i10.2	Si:dkey-251i10.2
F1QR06	emid1	EMI domain-containing 1 (Fragment)	Q8AY63	ckbb ckb	Brain-subtype creatine kinase (Creatine kinase, brain b)	A2CF32	glipr2	GLI pathogenesis-related 2
			Q8JH71	aldob	Fructose-bisphosphate aldolase B (EC 4.1.2.13) (Liver-type aldolase)	A2CF42	lrsam1	Leucine-rich repeat and sterile alpha motif-containing 1
			Q8JHI0	slc25a5 SLC25A5	Solute carrier family 25 alpha, member 5 (Solute carrier family 25 member 5) (Solute carrier family 25 member 5 protein) (Solute carrier family 25, member 5)	A2CF49	ptpa ppp2r4	Serine/threonine-protein phosphatase 2A activator (EC 5.2.1.8) (Phosphotyrosyl phosphatase activator)
			Q9DDU5	gstp1	Glutathione S-transferase pi (Glutathione S-transferase pi 1) (Gstp1 protein) (Pi-class glutathione S-transferase)	A2CG95	acadm	Acyl-CoA dehydrogenase medium chain
			Q9I9N6	pycard asc asc1	Apoptosis-associated speck-like protein containing a CARD (PYD and CARD domain-containing protein)	A2THY5	mtx1a	Metaxin 1a
			Q9PTH5	psme1	Proteasome activator subunit 1	E7F8C0	ipo9	Importin 9
			Q9PUC4	psme2	Proteasome activator subunit 2	A3KGZ5	vps37b si:dkey-21k4.4	Vacuolar protein sorting 37 homolog B (S. cerevisiae)
			Q9PVF8	ctnna1 ctnna	Catenin (Cadherin-associated protein), alpha (Catenin (cadherin-associated protein), alpha 1) (Cell-adhesion protein alphaE catenin)	A3KGZ6	ppp3cca ppp3cc	Serine/threonine-protein phosphatase (EC 3.1.3.16) (Fragment)
			Q6DG81			A3KMS9	prkacaa zgc:158799	Protein kinase, cAMP-dependent, catalytic, alpha, genome duplicate a (Zgc:158799 protein)
			Q6IQX2	col1a2	Collagen, type I, alpha 2	A3KNM2	tpd52 si:ch211-203l9.2 si:ch211-203l9.3	Si:ch211-203l9.2 (Tumor protein D52)
			A5JEM4			A3KP47	zgc:162941	Lysozyme g (EC 3.2.1.17)
			Q6GQM1	tuba7l	Tubulin alpha chain	A3KPG5
			Q6NW56	khdrbs1a khdrbs1	KH domain containing, RNA binding, signal transduction associated 1 (KH domain-containing, RNA-binding, signal transduction-associated 1a)	A3KPH5	crp7	Pentaxin (Pentraxin)
			A3KP36	cavin1b ptrf ptrfb	Caveolae-associated protein 1b (Ptrf protein)	A3KPH8	crp2	Pentaxin (Pentraxin)
			Q6NX89	eif5a	Eukaryotic translation initiation factor 5A (eIF-5A)	A3KPI6	si:ch211-288g17.3	Si:ch211-288g17.3
			Q7ZUP4	eif5a2 zgc:77429	Eukaryotic translation initiation factor 5A (eIF-5A)	A3KPN4	ptx3a	Pentraxin 3, long a
			Q7ZVY5	cs zgc:55507	Citrate synthase, mitochondrial (EC 2.3.3.1) (Citrate (Si)-synthase)	A3KPP9	exoc1	Exocyst complex component 1
			Q800G8	mxb	Interferon-induced GTP-binding protein MxB (IFN-inducible antiviral protein MxB) (Interferon-inducible MxB protein)	A3KPR3	histh1l	Histone H1-like
			Q66IB1	eloca tceb1a zgc:101879	Elongin C paralog a (Zgc:101879) (Zgc:101879 protein)	A3KPX2	abcf1	ATP-binding cassette, sub-family F (GCN20), member 1
			Q32LQ4	bhmt wu:fb53h01 zgc:123027	Betaine--homocysteine S-methyltransferase 1 (EC 2.1.1.5)	A3KPZ2	cratb DKEY-63J1.1-001	Carnitine O-acetyltransferase b (Novel protein similar to vertebrate carnitine acetyltransferase (CRAT))
			Q7ZT42	snd1 sn4tdr	Staphylococcal nuclease domain-containing protein 1 (100 kDa coactivator) (4SNc-Tudor domain protein) (p100 co-activator)	A3KPZ9	si:ch211-152p11.4 CH211-152P11.4-001	Novel protein similar to vertebrate regulator of G-protein signalling family (Si:ch211-152p11.4)
			Q5MJ86	gapdh-2 gapdh zgc:76908	Glyceraldehyde-3-phosphate dehydrogenase 2 (EC 1.2.1.12)	A3KQ59	usp39	Ubiquitin-specific peptidase 39
			Q568A3	capns1a capns1 zgc:110603	Calpain, small subunit 1 a (Zgc:110603 protein)	A3KQI1	gtpbp1l	GTP-binding protein 1,-like
			Q6DRM3	rpl9 rfc1	60S ribosomal protein L9 (Replication factor C (activator 1) 1) (Ribosomal protein L9)	A3KQK2	asns	Asparagine synthetase
			Q90XG0	tpi1b	Triosephosphate isomerase B (TIM-B) (EC 5.3.1.1) (Methylglyoxal synthase B) (EC 4.2.3.3) (Triose-phosphate isomerase B)	A3KQR0	acadl	Acyl-CoA dehydrogenase long chain
			Q8JIU7	naca	Nascent polypeptide-associated complex subunit alpha (NAC-alpha) (Alpha-NAC)	A3KQX1	cndp2	Carnosine dipeptidase 2
			Q6P698	lcp1 pls2	Plastin-2 (L-plastin) (Lymphocyte cytosolic plastin 1)	A3QJU3	coq8b adck4	Atypical kinase COQ8B, mitochondrial (EC 2.7.-.-) (AarF domain-containing protein kinase 4) (Coenzyme Q protein 8B)
			Q90473	hspa8 hsc70	Heat shock cognate 71 kDa protein (Heat shock 70 kDa protein 8)	A4FUL3	rbx1	Rbx1 protein (Ring-box 1, E3 ubiquitin protein ligase)
			Q7T2V2	sult1st3	Cytosolic sulfotransferase 3 (EC 2.8.2.-) (SULT1 ST3)	A4FUP0	sult2st3	Sulfotransferase (EC 2.8.2.-)
			Q1LVQ7	alx1 cart1 si:ch211-154h20.1 si:dkey-66c4.1	ALX homeobox protein 1 (Cartilage homeoprotein 1) (CART-1)	A4FVK4	rab8a	RAB8A, member RAS oncogene family (Rab8a protein)
						A4IG09	ftr83 si:dkey-7b17.2	FinTRIM family, member 83 (Si:dkey-7b17.2 protein)
						E9QGA3	micu1	Calcium uptake protein 1, mitochondrial
						A4IG34	plin6 zgc:162150	Perilipin 6 (Zgc:162150 protein)
						A4IGC8	aldh18a1	Delta-1-pyrroline-5-carboxylate synthase [Includes: Glutamate 5-kinase (GK) (EC 2.7.2.11) (Gamma-glutamyl kinase); Gamma-glutamyl phosphate reductase (GPR) (EC 1.2.1.41) (Glutamate-5-semialdehyde dehydrogenase) (Glutamyl-gamma-semialdehyde dehydrogenase)]
						E7F225	zgc:163061	Zgc:163061
						A4QNT9	stat5b stat5.2	Signal transducer and activator of transcription
						A4QP33	ppp2r5cb ppp2r5c si:dkey-241l7.9	Serine/threonine protein phosphatase 2A regulatory subunit
						A4QPA0	me3 im:7151680	Malic enzyme
						A4VCH0	sacm1la si:ch211-222e23.8	Phosphatidylinositide phosphatase SAC1-A (EC 3.1.3.-) (Suppressor of actin mutations 1-like protein A)
						A5A4L9	supt16h	FACT complex large subunit (SPT16 homolog, facilitates chromatin-remodeling subunit) (Suppressor of Ty 16 homolog)
						A5D6S3	mut	Methylmalonyl CoA mutase (Mut protein)
						A5PF59	leg1.2	Liver-enriched gene 1, tandem duplicate 2
						A5PF61	leg1a zgc:172246	Protein leg1a (Leg1-A) (Liver-enriched gene protein 1-A)
						A5PL98	sdhb	Succinate dehydrogenase [ubiquinone] iron-sulfur subunit, mitochondrial (EC 1.3.5.1) (Iron-sulfur subunit of complex II) (Ip)
						A5PLC1	kdelc2 zgc:165521	KDEL (Lys-Asp-Glu-Leu)-containing 2 (Zgc:165521 protein)
						A5PLC6	bag1 si:dkey-216e9.4	BCL2-associated athanogene 1 (Si:dkey-216e9.4 protein)
						A5PLJ7	oxsr1a	Oxidative stress-responsive kinase 1a (Oxsr1a protein)
						A5PLK2	lhpp zgc:165670	Phospholysine phosphohistidine inorganic pyrophosphate phosphatase (EC 3.1.3.-) (EC 3.6.1.1)
						A5PMC3	pld7 si:dkeyp-110e4.6	Si:dkeyp-110e4.6
						A5PMG4	ahcyl1 CH211-199O1.3-001	Adenosylhomocysteinase (EC 3.3.1.1)
						A5PMI3	nsun2	NOP2/Sun RNA methyltransferase family, member 2
						A5PMJ7	stx12	Syntaxin 12
						A5PMP8	c3b.2	Complement component c3b, tandem duplicate 2
						A5PMQ1	lta4h	Leukotriene A(4) hydrolase (LTA-4 hydrolase) (EC 3.3.2.6)
						A5PMS9	ap1b1	AP complex subunit beta
						A5PMV7	ppp2r1ba ppp2r1a	Protein phosphatase 2, regulatory subunit A, beta a
						A5PMY0	st14a	Suppressor of tumorigenicity 14 protein homolog (EC 3.4.21.109) (Serine protease 14)
						A5PMY4	rpa3	Replication protein A3
						A5PMZ3	scinlb	Scinderin-like b
						A5PN39	cryz	Crystallin, zeta (quinone reductase)
						A5PN55	me2 CH211-101J19.1-001	Malic enzyme
						A5PN62	ddah2 si:dkey-46a12.1	Dimethylarginine dimethylaminohydrolase 2 (Si:dkey-46a12.1)
						A5WUM0	prkaa1 DKEY-226M8.8-001	Non-specific serine/threonine protein kinase (EC 2.7.11.1)
						A5WUQ7	apobb.2 si:dkeyp-88f5.1	Apolipoprotein Bb, tandem duplicate 2
						A5WUY5	krt99 DKEY-90G20.1 DKEY-90G20.1-001	Keratin 99 (Novel keratin protein (Zgc:110712))
						A5WV16	acsl4b	Acyl-CoA synthetase long chain family member 4b
						A5WVI9	dnaja2b dnaja2l	DnaJ heat shock protein family (Hsp40) member A2b
						A5WVN8	si:dkey-238o13.4	Si:dkey-238o13.4
						A5WVQ0	nat10 NAT10	RNA cytidine acetyltransferase (EC 2.3.1.-) (18S rRNA cytosine acetyltransferase)
						A5WVQ1	caprin1b	Cell cycle-associated protein 1b
						A5WVS7	ing5a LOC792168	Inhibitor of growth protein
						A5WVU0	tbl1xr1b tbl1xr1	Transducin (beta)-like 1 X-linked receptor 1b
						A5WVX0	itpa si:ch73-18j6.1 si:dkey-19f21.1	Inosine triphosphate pyrophosphatase (ITPase) (Inosine triphosphatase) (EC 3.6.1.9) (Non-canonical purine NTP pyrophosphatase) (Non-standard purine NTP pyrophosphatase) (Nucleoside-triphosphate diphosphatase) (Nucleoside-triphosphate pyrophosphatase) (NTPase)
						F6P9F0	s100u	S100 calcium-binding protein U (Fragment)
						A5WWD9	noxa1	NADPH oxidase activator 1
						A5WWG5	srsf3b	Serine and arginine-rich-splicing factor 3b
						A5WWI5	ahsg2	Alpha-2-HS-glycoprotein 2
						A5WWM0	vps4b	Vacuolar protein sorting 4b homolog B (S. cerevisiae)
						A6NA21	cavin1b ptrf ptrfb	Caveolae-associated protein 1b (Polymerase I and transcript release factor)
						A7E2K1	tpm1 zgc:171719	Tropomyosin 1 (alpha) (Zgc:171719 protein)
						A7E2K4	rplp2l	Ribosomal protein, large P2,-like (Rplp2l protein)
						A7E2L8	lsm5 LSM5 zgc:171959	U6 snRNA-associated Sm-like protein LSm5
						A7MBU9	cmbl zgc:171683	Carboxymethylenebutenolidase homolog (Pseudomonas) (Zgc:171683 protein)
						A7MCF0	fip1l1b fip1l1 zgc:103421	FIP1-like 1b (S. cerevisiae) (Zgc:103421 protein)
						A7MCL7	cst14a.2 cst14a MGC174082	Cystatin 14a, tandem duplicate 2 (MGC174082 protein)
						A7MCR1	uqcrfs1	Cytochrome b-c1 complex subunit Rieske, mitochondrial (EC 7.1.1.8)
						A7YT47	hadhaa hadha	Hadha protein (Hydroxyacyl-CoA dehydrogenase trifunctional multienzyme complex subunit alpha a)
						A7YT77	qdpra	Qdpra protein (Quinoid dihydropteridine reductase a)
						A7YY10	zgc:171772	Zgc:171772 (Zgc:171772 protein)
						A8DZ56	si:rp71-1i20.2	Si:rp71-1i20.2
						A8DZ95	dpysl2b	Dihydropyrimidinase-like 2b
						A8DZD4	bnipl	BCL2-interacting protein-like
						A8DZE4	gpib	Glucose-6-phosphate isomerase (EC 5.3.1.9)
						A8DZG2	srsf6b	Serine and arginine-rich-splicing factor 6b
						A8DZJ0	tbcb	Tubulin folding cofactor B
						A8E526	rpl14	Ribosomal protein L14 (Rpl14 protein)
						A8E5F3	glod4	Glyoxalase domain-containing 4
						A8E5H4	golga7 zgc:86753	Golgin A7 (Zgc:86753)
						A8E7C9	sec23ip	SEC23-interacting protein
						A8E7G0	dhdhl	Dihydrodiol dehydrogenase (dimeric),-like
						A8E7G6	prdx3	Peroxiredoxin 3
						A8E7G8	tm9sf3	Transmembrane 9 superfamily member
						A8E7I5	ttc36 si:rp71-52f21.2 zgc:103600	Tetratricopeptide repeat protein 36 (TPR repeat protein 36)
						A8E7K4
						A8E7L1	anxa13l	Annexin
						A8E7N8	psmb4	Proteasome subunit beta (EC 3.4.25.1)
						A8E7S3	sdr16c5a	Short chain dehydrogenase/reductase family 16C, member 5a
						A8KB74	ca5a ca5	Ca5 protein (Carbonic anhydrase Va)
						A8KB78	rps23 zgc:171710	Ribosomal protein S23 (Zgc:171710) (Zgc:171710 protein)
						A8KBJ5	zgc:173552	Histone H3
						A8KBR8	gstm.2 zgc:173994	Glutathione S-transferase mu tandem duplicate 2 (Zgc:173994 protein)
						A8KC02	cbr1l LOC792137	Carbonyl reductase 1-like (LOC792137 protein)
						A8KC22	hnrnpl2 hnrnpl	Heterogeneous nuclear ribonucleoprotein L2 (Hnrnpl protein)
						F1R2A5
						A8KC30	psmc1a	Proteasome (Prosome, macropain) 26S subunit, ATPase, 1a (Proteasome 26S subunit, ATPase 1a)
						A8WFT4	scly zgc:171514	Selenocysteine lyase (Zgc:171514 protein)
						A8WFU6	serpinh1a zgc:171630	Serpin peptidase inhibitor, clade H (heat shock protein 47), member 1a (Zgc:171630 protein)
						A8WGM1	vapal	VAMP (vesicle-associated membrane protein)-associated protein A,-like
						A8WGP7	ugdh	UDP-glucose 6-dehydrogenase (EC 1.1.1.22)
						A8WHU6
						A8WI00	stam2	Signal transducing adaptor molecule (SH3 domain and ITAM motif) 2
						A8WIP2	mecp2	Methyl-CpG-binding protein 2 (MeCp-2 protein) (MeCp2)
						A8Y5U1	si:dkey-46a10.3 wu:fd42g01	UPF0600 protein C5orf51 homolog
						A9C3P0	mlec si:dkey-117k10.5	Malectin
						A9C3Q7	amt	Aminomethyltransferase (EC 2.1.2.10) (Glycine cleavage system T protein)
						A9C3T0	prkar2aa	Protein kinase, cAMP-dependent, regulatory, type II, alpha A
						A9C462	cox6a1	Cytochrome c oxidase subunit 6A, mitochondrial (Cytochrome c oxidase polypeptide VIa)
						A9JR96	wdr43 wdr43l	WD repeat domain 43
						A9JRC7	ppp4cb zgc:172126	Serine/threonine-protein phosphatase 4 catalytic subunit B (PP4C-B) (EC 3.1.3.16)
						A9JRE2	mri1 zgc:172216	Methylthioribose-1-phosphate isomerase (M1Pi) (MTR-1-P isomerase) (EC 5.3.1.23) (S-methyl-5-thioribose-1-phosphate isomerase) (Translation initiation factor eIF-2B subunit alpha/beta/delta-like protein)
						A9JRP8	zgc:86896	Actin-related protein 2/3 complex subunit
						A9JRU2	pdp1 zgc:174908	Pyruvate dehyrogenase phosphatase catalytic subunit 1 (Zgc:174908 protein)
						A9JT06	eif4e1c zgc:110154	Eukaryotic translation initiation factor 4E family member 1c (Zgc:110154 protein)
						A9JTB1	npl	Npl protein
						A9JTC4	memo1	Mediator of cell motility 1 (Protein MEMO1)
						A9JTC8	gnai3	Gnai3 protein (Guanine nucleotide-binding protein (G protein), alpha-inhibiting activity polypeptide 3)
						B0BLX4	zgc:175088	Zgc:175088 (Zgc:175088 protein)
						B0BLY0	exoc5 zgc:175220	Exocyst complex component 5 (Zgc:175220) (Zgc:175220 protein)
						B0R028	psmb5 psmb5-001	Proteasome subunit beta (EC 3.4.25.1)
						B0R068	atp1a1b	Sodium/potassium-transporting ATPase subunit alpha
						B0R0D7	coro1ca	Coronin-1C-A
						B0R0K9	si:ch211-103n10.5	Si:ch211-103n10.5
						Q6PC35	atp6v1h	V-type proton ATPase subunit H
						B0R137	sult1st1	Sulfotransferase (EC 2.8.2.-)
						B0R171	copb2	Coatomer subunit beta'
						B0R1B8	neflb nefl	Neurofilament, light polypeptide b
						B0R1D0	psmc4 CH211-265P12.8 CH211-265P12.8-001	Novel protein (Zgc:63709) (Proteasome 26S subunit, ATPase 4)
						E9QGJ1	arhgef16	Rho guanine nucleotide exchange factor (GEF) 16
						Q6P020	mapre1a mapre1l	Mapre1l protein (Microtubule-associated protein, RP/EB family, member 1a)
						B0S5C4
						B0S5C5	acaa2	Acetyl-CoA acyltransferase 2
						B0S5D9	tm9sf2	Transmembrane 9 superfamily member
						B0S5H0	ccdc22	Coiled-coil domain-containing protein 22
						B0S5H7	si:ch211-229n2.7	Si:ch211-229n2.7
						B0S5L8	mcm3ap	Minichromosome maintenance complex component 3-associated protein
						B0S5S6	pdia5	Protein disulfide isomerase family A, member 5
						B0S5S9	acbd6	Acyl-CoA-binding domain-containing protein 6
						B0S602	fn1a fn1	Fibronectin 1a
						B0S642	hibch	3-hydroxyisobutyryl-CoA hydrolase, mitochondrial (EC 3.1.2.4) (3-hydroxyisobutyryl-coenzyme A hydrolase)
						B0S6B5	zgc:153654	Zgc:153654
						B0S6B9	nrd1a	Nardilysin a (N-arginine dibasic convertase)
						B0S6F6	mob3a	MOB kinase activator 3A
						B0S6H4	plp2	Proteolipid protein 2
						B0S6K3	cacybp DKEY-4I23.2-001	Calcyclin-binding protein
						F1QSR3	tnn tnw	Tenascin N
						B0S6K7	renbp	Renin-binding protein
						B0S6P6	ddx3xa ddx3 ddx3a	DEAD-box helicase 3 X-linked a
						B0S6R1	nckap1 si:dkey-234n3.1 wu:fd05c01	Nck-associated protein 1 (NAP 1)
						B0S6Z1	dhx9 si:ch211-194i4.1	DEAH (Asp-Glu-Ala-His) box helicase 9
						B0S754	snrnp200 si:ch211-251j10.5	Small nuclear ribonucleoprotein 200 (U5)
						B0S8K3	lrrc15	Leucine-rich repeat-containing 15
						F1Q9H9	mtor	Serine/threonine-protein kinase TOR (EC 2.7.11.1)
						B0UXL2	idh1	Isocitrate dehydrogenase [NADP] (EC 1.1.1.42)
						B0UXN0	qsox1 si:dkey-39n1.2	Sulfhydryl oxidase (EC 1.8.3.2)
						B0UXN4	fnbp1l	Formin-binding protein 1-like
						B0UXS4	si:dkeyp-69e1.8	Si:dkeyp-69e1.8
						B0UYA3
						B0UYB4	si:dkey-91i10.3	Si:dkey-91i10.3
						B0UYD6	qars	Glutaminyl-tRNA synthetase
						B0UYH4	fmodb si:dkey-31j12.4	Fibromodulin b
						B0UYH7	glmna	Glomulin, FKBP-associated protein a
						B0UYJ6	comta	Catechol O-methyltransferase A (Fragment)
						B0UYL4	esyt3	Extended synaptotagmin-like protein 3
						B0UYL5	dhrs12	Dehydrogenase/reductase (SDR family) member 12
						B0UYM8	lmo7a	LIM domain 7a
						B0UYN4	zgc:162944	Zgc:162944
						B0UYR8	krt98	Keratin 98
						B0UYS0	krt15	Keratin 15
						B0V0X1	pccb	Propionyl-CoA carboxylase subunit beta
						B0V0Y6	exoc3	Exocyst complex component 3
						B0V1I0	snrpd3 p2rx4b	Small nuclear ribonucleoprotein Sm D3 (Sm-D3) (snRNP core protein D3)
						B0V1K1	aimp1	Aminoacyl tRNA synthetase complex-interacting multifunctional protein 1
						B0V1K4	zgc:136930	Zgc:136930
						B0V1L8	dpp9	Dipeptidyl-peptidase 9
						B0V234	fhl2b	Four and a half LIM domains 2b
						B0V3R7	serpind1	Serpin peptidase inhibitor, clade D (heparin cofactor), member 1
						B0V3S8	myef2	Myelin expression factor 2
						B1H1M3	plpbp PROSC prosc	Pyridoxal phosphate homeostasis protein (PLP homeostasis protein) (Proline synthase co-transcribed bacterial homolog protein)
						F1RDF6	map2k4a	Mitogen-activated protein kinase kinase 4a
						B1WB51	hypk zgc:171549	Huntingtin-interacting protein K (Zgc:171549 protein)
						B1WB98	stk26 mst4 zgc:175288	Serine/threonine protein kinase 26 (Zgc:175288 protein)
						B2GTW6	cs	Citrate synthase
						B3DFN3	lmnb2	Lamin B2
						B3DFP9	apoa2 zgc:193613	Apolipoprotein A-II (Zgc:193613)
						B3DFQ1	capns1b	Calpain, small subunit 1 b (Capns1b protein)
						E9QH88	apoc4	Apolipoprotein C-IV
						B3DFS9	myh11a myh11	Myosin, heavy chain 11a, smooth muscle (Myosin, heavy polypeptide 11, smooth muscle)
						B3DGI9	timm8b	translocase of inner mitochondrial membrane 8 homolog B (Yeast)
						B3DIP9	itgb3b	Integrin beta
						B3DIV6	dlat	Acetyltransferase component of pyruvate dehydrogenase complex (EC 2.3.1.12)
						B3DJ34	pip4k2aa LOC560360	Phosphatidylinositol-5-phosphate 4-kinase, type II, alpha a (Similar to type II phosphatidylinositolphosphate kinase-alpha)
						B3DJG2	pcolceb LOC794872	Procollagen C-endopeptidase enhancer b (Similar to procollagen C-endopeptidase enhancer)
						Q6ZM52	sart3	Squamous cell carcinoma antigen recognized by T-cells 3
						B3DKC0	fkbp10b fkbp10	Peptidylprolyl isomerase (EC 5.2.1.8)
						B3DKC5	lmna	Lamin A
						B3DKI8	scfd1 sly1	Sec1 family domain-containing 1 (Suppressor of ypt1)
						B3DKJ0	cct7	T-complex protein 1 subunit eta (TCP-1-eta) (CCT-eta)
						B3DLH5	plek2	Pleckstrin 2 (Plek2 protein)
						B6IDE7	frem2b	Fras1-related extracellular matrix protein 2b (Frem2b)
						B7SEE0	irf3	Interferon regulatory factor 3
						Q642J7	rps24	40S ribosomal protein S24
						B7ZD39	ppa1b ppa1	Pyrophosphatase (inorganic) 1b
						B7ZDA2	galm	Aldose 1-epimerase (EC 5.1.3.3) (Galactose mutarotase)
						B7ZDB5	bgnb	Biglycan
						B7ZUU8	ap3d1 si:ch211-129c21.6	Adaptor-related protein complex 3 subunit delta 1 (Si:ch211-129c21.6)
						B7ZV06	chmp2a bc2	Bc2 protein (Charged multivesicular body protein 2a)
						B7ZV28	ptpn23b si:dkeyp-114f9.2	Protein tyrosine phosphatase, non-receptor type 23, b (Si:dkeyp-114f9.2 protein)
						B8A443
						B8A445	slc44a1a slc44a1	Solute carrier family 44 member 1a (Fragment)
						F1R9I5	zgc:193505	Zgc:193505 (Fragment)
						B8A4C9	cst3	Cystatin
						B8A4D7	rrbp1a	Ribosome-binding protein 1a
						B8A4H6	pgam1b	Phosphoglycerate mutase (EC 5.4.2.11) (EC 5.4.2.4)
						B8A4N9	golga5	Golgin subfamily A member 5
						B8A4Q2	pdxkb DKEY-263M10.2-001	Novel protein similar to vertebrate pyridoxal (Pyridoxine, vitamin B6) kinase (PDXK) (Pyridoxal (pyridoxine, vitamin B6) kinase b)
						B8A4U0	cd99	CD99 molecule
						B8A4U1	cd99	CD99 molecule
						Q7T391	anxa11a	Annexin
						B8A5D3	nars	Asparaginyl-tRNA synthetase
						B8A5D4	txnl1	Thioredoxin-like 1
						B8A5I7	ssbp1	Single-stranded DNA-binding protein 1
						B8A5K2	itga6b	Integrin, alpha 6b
						B8A5L1	ecpas si:dkey-245p14.7	Ecm29 proteasome adaptor and scaffold
						F1QS14	klc1a	Kinesin light chain 1a
						B8A5V6	pdlim1	PDZ and LIM domain 1 (elfin)
						B8A688	si:ch211-198a12.6	Si:ch211-198a12.6
						B8JHR9	kpnb3	Karyopherin (importin) beta 3
						B8JHU4	actn1	Actinin, alpha 1 (Actn1 isoform b)
						B8JI00	suclg1 SUCLG1	Succinate--CoA ligase [ADP/GDP-forming] subunit alpha, mitochondrial (EC 6.2.1.4) (EC 6.2.1.5) (Succinyl-CoA synthetase subunit alpha) (SCS-alpha)
						B8JI15	rpia	Ribose 5-phosphate isomerase A (ribose 5-phosphate epimerase)
						B8JI17	psap	Prosaposin
						B8JIH4	chuk	Inhibitor of nuclear factor kappa-B kinase subunit alpha
						B8JIJ7	rdh14a	Retinol dehydrogenase 14a
						B8JIS1	atp5pb atp5f1	ATP synthase peripheral stalk-membrane subunit b
						B8JIS5	gstm.3 gstm3	Glutathione S-transferase mu tandem duplicate 3
						B8JIS8	gstm.1 gstm	Glutathione S-transferase mu, tandem duplicate 1
						B8JJ32	sfxn3	Sidoreflexin
						B8JK21	casp3a	Caspase 3, apoptosis-related cysteine peptidase a (Caspase 3a)
						B8JKC9	hk2 DKEYP-106C11.1-001	Hexokinase 2
						B8JKN6	ppiaa ppia	Peptidyl-prolyl cis-trans isomerase (PPIase) (EC 5.2.1.8)
						B8JKW4	c3a.1 si:dkey-76b14.4	Complement component c3a, duplicate 1
						B8JKY9	snrpd1	Small nuclear ribonucleoprotein Sm D1 (snRNP core protein D1) (Fragment)
						B8JL43	tfa	Serotransferrin
						B8JL46	eif4g1a	Eukaryotic translation initiation factor 4 gamma, 1a
						B8JL82	ssr3	Signal sequence receptor, gamma
						B8JLE6	rasef si:ch73-275j21.1	Ras and EF-hand domain-containing protein
						B8JLJ3	ywhaz	Tyrosine 3-monooxygenase/tryptophan 5-monooxygenase activation protein, zeta polypeptide
						B8JLJ8	hnrpkl	Heterogeneous nuclear ribonucleoprotein K,-like
						B8JLK8	itgav	Integrin, alpha V
						B8JLR1	pdcd6ip	Programmed cell death 6-interacting protein
						B8JLR8	rab35b rab35	RAB35, member RAS oncogene family b
						B8JLW8	gmps	Guanine monophosphate synthase
						B8JLZ3	anxa1b	Annexin
						B8JM11	epcam	Epithelial cell adhesion molecule
						B8JM34	atp5pf atp5j	ATP synthase-coupling factor 6, mitochondrial (ATPase subunit F6)
						B8JM93	igbp1	Immunoglobulin (CD79A)-binding protein 1
						B8JMC1	blvrb	Biliverdin reductase B
						F1R737
						B8JMI5	prg4a	Proteoglycan 4a
						B8JMZ3	dpy30	Dpy-30 histone methyltransferase complex regulatory subunit
						D6MUD3	col11a1b COL11A1b	Collagen type XI alpha-1b (Collagen, type XI, alpha 1b)
						F8W412
						E7EXC7
						E9QIC1	cdc5l	CDC5 cell division cycle 5-like (S. pombe)
						F1RCF3	slc35c2	Solute carrier family 35 member C2
						E7EXG2	dbnlb	Drebrin-like b
						E7EXJ6	nup188	Nucleoporin 188
						E7EXL6	myofl	Myoferlin-like
						E7EXY4	ago2 AGO2 EIF2C2	Protein argonaute-2 (Argonaute2) (EC 3.1.26.n2) (Eukaryotic translation initiation factor 2C 2) (eIF-2C 2) (eIF2C 2) (Protein slicer)
						E7EY13	chdh	Choline dehydrogenase (EC 1.1.99.1)
						E7EYF3	uba7	Ubiquitin-like modifier-activating enzyme 7
						E7EYQ0	serbp1b	SERPINE1 mRNA-binding protein 1b
						E7EYW2	epn2	Epsin 2
						E7EZ02	lsm8 LSM8	U6 snRNA-associated Sm-like protein LSm8
						Q6DHR6	thop1 zgc:92139	Thimet oligopeptidase 1 (Zgc:92139)
						E7EZ94	gstt1a	Glutathione S-transferase theta 1a
						E7EZA7
						E7EZD6	usp4	Ubiquitin-specific peptidase 4 (proto-oncogene)
						E7EZE2	stt3b	STT3B, subunit of the oligosaccharyltransferase complex (catalytic)
						E7EZE6	lsm3 LSM3	U6 snRNA-associated Sm-like protein LSm3
						E7EZF4	lsp1	Lymphocyte-specific protein 1 (Fragment)
						E7EZK3	si:ch211-203d1.3	Si:ch211-203d1.3
						E7EZP9	fhl3a fhl3	Four and a half LIM domains 3a
						F1QRW4	pitpnb	Phosphatidylinositol transfer protein, beta
						E7EZW6	srpra srpr	SRP receptor subunit alpha
						E7F071	hnrnpul1l	Heterogeneous nuclear ribonucleoprotein U-like 1 like
						E7F084	kif13bb	Kinesin family member 13Bb
						E7F0A1	pfn1	Profilin
						E7F0E2	gnpda2	Glucosamine-6-phosphate isomerase (EC 3.5.99.6) (Glucosamine-6-phosphate deaminase)
						E7F0E8	xpo1a	Exportin 1 (CRM1 homolog, yeast) a
						E7F0H8	hmgb3b	High mobility group box 3b
						E7F0X5	LOC100538089	Uncharacterized protein
						E7F123	si:ch211-106j24.1	Aminopeptidase (EC 3.4.11.-)
						F1QIU5	mcamb	Melanoma cell adhesion molecule b
						E7F1L9	eps8l1b si:ch73-70c5.1	Eps8-like 1b
						E7F1M5	frk fynrk	Tyrosine-protein kinase (EC 2.7.10.2)
						F1R930	cnot10	CCR4-NOT transcription complex subunit 10
						E7F1R9	arhgap27l	Rho GTPase-activating protein 27,-like
						E7F1T8
						E7F1U6
						F8W2E1	srrm1	Serine/arginine repetitive matrix 1
						E7F292	mapk13	Mitogen-activated protein kinase (EC 2.7.11.24)
						E7F2B6	parga	Poly (ADP-ribose) glycohydrolase a
						E7F2M5	cd59	CD59 molecule (CD59 blood group)
						E7F2X0	clip1a	CAP-GLY domain-containing linker protein 1a
						E7F333	lrrc8c	Leucine-rich repeat-containing 8 VRAC subunit C
						E7F354	ywhag2	3-monooxygenase/tryptophan 5-monooxygenase activation protein, gamma polypeptide 2
						E7F370	cdh26.1	Cadherin 26, tandem duplicate 1
						E7F372	rasa1b	RAS p21 protein activator (GTPase-activating protein) 1b
						E7F3A5	si:ch211-212k18.7	Si:ch211-212k18.7
						E7F3G8	si:ch211-113j14.1	Si:ch211-113j14.1
						E7F3I8	dhx15	DEAH (Asp-Glu-Ala-His) box helicase 15
						E7F3J2	hnrnpua	Heterogeneous nuclear ribonucleoprotein Ua
						E7F3Q4
						E9QCZ8	shc1 si:dkey-246i14.4	SHC (Src homology 2 domain-containing)-transforming protein 1
						E7F3Z5	crtc3	CREB-regulated transcription coactivator 3
						E7F464	gan	Uncharacterized protein
						Q66I72	f11r.1 f11r	F11 receptor (F11 receptor, tandem duplicate 1) (F11r)
						E7F4L5	prkcdb	Protein kinase C delta type (EC 2.7.11.13) (nPKC-delta)
						I3ITK3	si:dkey-19e4.5	Si:dkey-19e4.5
						E7F4R0	afdna mllt4 mllt4a si:ch211-278j12.1	Afadin, adherens junction formation factor a
						E7F4R9	idh2	Isocitrate dehydrogenase 2 (NADP+), mitochondrial
						E7F4T0	plecb	Plectin b
						E7F4T4	zc3h7bb zc3h7b	Zinc finger CCCH-type-containing 7Bb
						E7F569	si:ch211-153b23.5	Si:ch211-153b23.5
						E7F5A4	si:dkey-261m9.12	Si:dkey-261m9.12
						E7F5I3	postna	Periostin, osteoblast-specific factor a
						E7F5V5	and1	Actinodin1
						E7F646	plcd4b	Phosphoinositide phospholipase C (EC 3.1.4.11)
						E7F6M9	rilp	Rab-interacting lysosomal protein
						E7F715	sec24b	SEC24 homolog B, COPII coat complex component
						E7F7J1	fdx1	Ferredoxin 1
						E7F7U1	pxnb	Paxillin b
						E7F811	tom1l2	Target of myb1-like 2 membrane-trafficking protein
						E7F8A7	entpd5a	Ectonucleoside triphosphate diphosphohydrolase 5a
						E7F8G5	arhgap35a	Rho GTPase-activating protein 35a
						E7F8M9	fam169ab	Family with sequence similarity 169 member Ab (Fragment)
						E7F8Q5	huwe1	HECT, UBA and WWE domain-containing 1
						E7F8T6	nampta	Nicotinamide phosphoribosyltransferase (NAmPRTase) (EC 2.4.2.12)
						E7F8X0	srpx2 si:ch73-137d5.1	Sushi-repeat-containing protein X-linked 2
						F1QVD2	u2af2a	U2 snRNP auxiliary factor large subunit
						E7F948		Transportin 2
						E7F9F1	larsa	Leucyl-tRNA synthetase a
						E7F9L8	myo1d si:ch211-94l19.4	Unconventional myosin-Id (Myosin 1d) (Myosin1D)
						E7F9M7	si:ch73-18b11.1	Si:ch73-18b11.1
						E7F9N7
						E7F9Y7	tagln3b	Transgelin 3b
						E7FA12	trappc8	Trafficking protein particle complex 8
						E7FA22	si:ch211-251p5.5	Si:ch211-251p5.5
						E7FAA1	si:ch211-157c3.4	Si:ch211-157c3.4
						E7FAD0	myhz1.1	Myosin, heavy polypeptide 1.1, skeletal muscle
						E7FAE7	si:ch211-105c13.3	Si:ch211-105c13.3
						E7FAN0	cc2d1a	Uncharacterized protein
						E7FAN5	f2	Coagulation factor II (thrombin)
						E7FAQ8	hnrnpa1a	Heterogeneous nuclear ribonucleoprotein A1a
						E7FAT1	dlg1	Disks large homolog 1
						E7FAU1	si:dkey-108k21.14	Si:dkey-108k21.14
						E7FB37	ptbp3 si:dkey-27p1.2	Polypyrimidine tract-binding protein 3
						E7FB39	myo5ab	Myosin VAb
						E7FB42	fat2	FAT atypical cadherin 2
						E7FB58	fdxr	NADPH:adrenodoxin oxidoreductase, mitochondrial (EC 1.18.1.6)
						E7FB76	col21a1	Collagen, type XXI, alpha 1
						E7FBD3	apoba	Apolipoprotein Ba
						E7FBD5	iqgap1	IQ motif-containing GTPase-activating protein 1
						E7FBR0	pkp1b pkp1	Plakophilin 1b
						E7FC32	tubb1 si:ch211-122i22.4	Tubulin beta chain
						E7FC82	fam129ab si:dkeyp-92f1.1	Family with sequence similarity 129 member Ab
						E7FCE5	ppp1r37	Protein phosphatase 1 regulatory subunit 37
						E9QF76	arfgef2 si:dkey-192i18.4	ADP-ribosylation factor guanine nucleotide-exchange factor 2 (brefeldin A-inhibited)
						E7FCN5	itgb2	Integrin beta
						E7FCN9	cspg4	Chondroitin sulfate proteoglycan 4
						E7FCQ0	cnbpb cnbp	CCHC-type zinc finger, nucleic acid-binding protein b
						E7FCV2	c5	Complement component 5
						E7FCV8	col6a2	Collagen, type VI, alpha 2
						E7FCW1	wu:fk65c09	Wu:fk65c09
						E7FCW2
						E7FCZ2	apnl	Actinoporin-like protein
						E7FD91	ddx6	DEAD (Asp-Glu-Ala-Asp) box helicase 6
						E7FDL3	si:ch211-136m16.8	Si:ch211-136m16.8
						E7FDL7	sntb2	Syntrophin, beta 2
						E7FDP4	galk2	Galactokinase 2
						E7FDU0	bckdhb	Branched chain keto acid dehydrogenase E1, beta polypeptide
						E7FE01	dis3	DIS3 exosome endoribonuclease and 3'-5' exoribonuclease
						E7FE19	cnp	2',3'-cyclic nucleotide 3' phosphodiesterase
						F1QE65	cyfip1	Cytoplasmic FMR1-interacting protein
						E7FE47	col5a2b	Collagen, type V, alpha 2b
						E7FE90	fetub	Fetuin B
						E7FED8	unm_sa911	Un-named sa911
						E7FEH9	pea15	Proliferation and apoptosis adaptor protein 15
						E7FEK9	golga4	Golgin A4
						E7FEQ1
						E7FEZ9	atox1	Antioxidant 1 copper chaperone (Copper chaperone Atox1)
						E7FF10	vwa1	von Willebrand factor A domain-containing 1
						Q6IQ66	nudt5	Nudix (nucleoside diphosphate-linked moiety X)-type motif 5
						F1QCU8
						E7FFC4	aifm2	Apoptosis-inducing factor, mitochondrion-associated, 2
						E7FFY5	adamtsl4	Uncharacterized protein
						F1Q7R9	entpd1	Ectonucleoside triphosphate diphosphohydrolase 1
						E7FG48	tppp3	Tubulin polymerization-promoting protein family member 3
						E7FG71	fbn2b	Fibrillin 2b (Fragment)
						E7FG81	col12a1b si:ch211-106k22.1	Collagen, type XII, alpha 1b
						E7FG92	tmtc3	Transmembrane and tetratricopeptide repeat-containing 3
						E7FGA5	gsr	Glutathione reductase (EC 1.8.1.7)
						E7FGL4	abhd17ab si:rp71-61h23.3	Abhydrolase domain-containing 17Ab
						E7FGM1	si:dkey-27b3.2	Si:dkey-27b3.2
						E7FGT2	h6pd si:dkey-148l2.3	Hexose-6-phosphate dehydrogenase (glucose 1-dehydrogenase)
						E7FGZ9	zc3h4	Zinc finger CCCH-type-containing 4
						E7FH67
						E9QBC9	cast	Calpastatin (Fragment)
						E9QBD7	krt5	Keratin 5 (Fragment)
						E9QBF0	tpi1b	Triosephosphate isomerase (EC 5.3.1.1) (Fragment)
						E9QBR7	casp6l1	Caspase 6, apoptosis-related cysteine peptidase,-like 1 (Fragment)
						E9QBZ2	ankrd28b	Ankyrin repeat domain 28b
						E9QBZ4	fermt1 si:ch73-22c10.1	Fermitin family member 1
						E9QCD1	fga	Fibrinogen alpha chain
						F1R0S8	ist1	Increased sodium tolerance 1 homolog (yeast)
						E9QDE9	rabgap1l	RAB GTPase-activating protein 1-like
						E9QFX0	apoc1 apoc1l	Apolipoprotein C-I
						E9QDR6	si:ch211-183d21.1	Si:ch211-183d21.1
						E9QE29	mapk9	Mitogen-activated protein kinase (EC 2.7.11.24)
						E9QEE8	ndufb4	NADH:ubiquinone oxidoreductase subunit B4
						E9QEQ1	apoc2	Apolipoprotein C-II
						E9QET4	tjp1a tjp1	Tight junction protein 1a
						E9QF10	si:dkey-27p18.3	Si:dkey-27p18.3 (Fragment)
						E9QF30	si:dkey-82j4.2	Si:dkey-82j4.2
						E9QF35	cast	Calpastatin (Fragment)
						E9QFD8	vtg7	Vitellogenin 7
						E9QFE1	myh14	Myosin, heavy chain 14, non-muscle
						E9QFU8	bcat2	Branched-chain-amino-acid aminotransferase (EC 2.6.1.42)
						Q8JFE3	tp63 tp73l	Tumor protein 63 (p63)
						E9QG66	emc1 si:dkey-7c22.1	ER membrane protein complex subunit 1
						Q6TNS5	MLC3SM zgc:153867	Myosin light chain alkali, smooth-muscle isoform (Zgc:153867) (Zgc:153867 protein)
						E9QGH3	cast	Calpastatin (Fragment)
						E9QGI1
						E9QH15	eftud2	Elongation factor Tu GTP-binding domain-containing 2
						U3JB26	srsf2a	Serine and arginine-rich-splicing factor 2a (Fragment)
						E9QHI1	tnc	Tenascin C
						E9QHR6	tmem11	Transmembrane protein 11, mitochondrial
						E9QHX8	ssr4	Signal sequence receptor, delta
						E9QI07
						E9QIH3	lrrc8aa lrrc8a	Leucine-rich repeat-containing 8 VRAC subunit Aa
						E9QIK0	emd	Emerin (Emery-Dreifuss muscular dystrophy)
						E9QIQ3	nup62l	Nucleoporin 62-like
						E9QIR9	rpl10	60S ribosomal protein L10 (Fragment)
						E9QJ57	si:dkeyp-82a1.6	Si:dkeyp-82a1.6
						E9QJG3	si:dkey-7f3.14	Si:dkey-7f3.14
						F1Q4M0
						F1Q4M1	jac7	Jacalin 7
						F1Q4M2	rdh12l	Retinol dehydrogenase 12,-like
						F1Q4N4	ndufs2	NADH:ubiquinone oxidoreductase core subunit S2
						F1Q4N7	anp32b	Acidic (leucine-rich) nuclear phosphoprotein 32 family, member B
						F1Q4Q1	zgc:112496	Zgc:112496
						F1Q4Q4	lmf2b	Lipase maturation factor
						F1Q4R1	dock6 si:dkey-114l24.1	Dedicator of cytokinesis 6
						F1Q4X5	c4	Complement component 4
						F1Q4X8	evpla	Envoplakin a
						F1Q4Y0	arhgef1b	Rho guanine nucleotide exchange factor (GEF) 1b
						F1Q510	enosf1	Enolase superfamily member 1
						F1Q520
						F1Q555	gpd2	Glycerol-3-phosphate dehydrogenase 2 (mitochondrial)
						F1RAJ8	ykt6	Synaptobrevin homolog YKT6
						F1Q5D8	vtnb	Vitronectin b
						F1Q5Z2	ap1s1	AP complex subunit sigma
						F1Q649	tns1b tns1	Tensin 1b
						F1R1D1	ptpn23a	Protein tyrosine phosphatase, non-receptor type 23, a
						F1Q688	cavin2a sdpra	Caveolae-associated protein 2a
						F1Q6A4	comtd1	Catechol-O-methyltransferase domain-containing 1 (Fragment)
						F1Q6E4	jpt2 hn1l	Jupiter microtubule-associated homolog 2
						F1Q6F9	sltm	SAFB-like, transcription modulator
						F1Q6P3	col6a1	Collagen, type VI, alpha 1
						F1Q6Q6	myo6a	Myosin VIa
						F1Q6S1	npepl1	Aminopeptidase-like 1
						F1Q6S4	abhd16a	Abhydrolase domain-containing 16A
						F1Q6Z1	faf2	Fas-associated factor family member 2
						F1Q6Z3	mpc1	Mitochondrial pyruvate carrier
						F1Q6Z5	cnbpa zff9	CCHC-type zinc finger, nucleic acid-binding protein a
						F1Q6Z7	zgc:56064	Serine/threonine-protein phosphatase (EC 3.1.3.16)
						F1Q740	vars	Valyl-tRNA synthetase
						F1Q749	dkc1	Dyskeratosis congenita 1, dyskerin
						F1Q774	eif3jb EIF3J EIF3S1	Eukaryotic translation initiation factor 3 subunit J (eIF3j) (Eukaryotic translation initiation factor 3 subunit 1) (eIF-3-alpha) (eIF3 p35)
						F1Q7A2	fhl1b fhl	Four and a half LIM domains 1b
						F1Q7D8	si:ch211-127b6.2	Si:ch211-127b6.2
						F1Q7F3	pora POR	NADPH--cytochrome P450 reductase (CPR) (P450R) (EC 1.6.2.4)
						F1Q7F8	rbm4.2	RNA-binding motif protein 4.2
						F1Q7G9	prss16	Serine protease 16
						F1Q7K7	casp3b	Caspase 3, apoptosis-related cysteine peptidase b
						F1Q7L0	vtg4	Vitellogenin 4 (Fragment)
						F1Q7N1	si:ch1073-291c23.1 ch1073-291c23.1	Si:ch1073-291c23.1 (Fragment)
						F1Q7S8	ago3a AGO3 EIF2C3	Protein argonaute-3 (Argonaute3) (Eukaryotic translation initiation factor 2C 3) (eIF-2C 3) (eIF2C 3)
						F1Q814
						F1Q820	farsb	Phenylalanyl-tRNA synthetase subunit beta
						F1Q861	zgc:153921	Zgc:153921
						F1Q883	pgd	6-phosphogluconate dehydrogenase, decarboxylating (EC 1.1.1.44)
						F1Q884	gnmt	Glycine N-methyltransferase (EC 2.1.1.20)
						F1Q890	plg	Plasminogen (EC 3.4.21.7)
						F1Q8A5	hnrnpd	Heterogeneous nuclear ribonucleoprotein D
						F1Q8B0	agr1	Ag1 (Anterior gradient 1)
						F1Q8D2	nsfl1c	NSFL1 (p97) cofactor (p47)
						F1R183	eif4bb	Eukaryotic translation initiation factor 4Bb
						F1Q8J4	acadvl	Acyl-CoA dehydrogenase very long chain
						F1Q8J9	pkp3a pkp3	Plakophilin 3a
						F1Q8L0	mrpl46	Mitochondrial ribosomal protein L46
						F1Q8M3	arfip1	ADP-ribosylation factor-interacting protein 1 (arfaptin 1)
						F1Q8N0	dhrs4 dhrs2	Dehydrogenase/reductase (SDR family) member 4
						F1Q8P7	eif2s2	Eukaryotic translation initiation factor 2, subunit 2 beta
						F1Q8Q6	tkfc dak	Triokinase/FMN cyclase
						F1Q8S5	col4a1	Collagen, type IV, alpha 1 (Fragment)
						F1Q8S6	lpcat2	Lysophosphatidylcholine acyltransferase 2
						F1Q8T3
						F1Q8W8	calr	Calreticulin
						F1Q8X5	fermt2	Fermitin family homolog 2 (Kindlin-2)
						F1Q924	col6a4a col6a6	Collagen, type VI, alpha 4a (Fragment)
						F1Q953	nup155	Nucleoporin 155
						F1Q986	hpdb	4-hydroxyphenylpyruvate dioxygenase
						F1Q997	ap1m3	Adaptor-related protein complex 1 subunit mu 3
						F1Q9A4	cox7a2a cox7a2	Cytochrome c oxidase subunit 7A2a
						F1Q9C7	ufl1	E3 UFM1-protein ligase 1
						F1Q9D1	alyref	Aly/REF export factor
						F1Q9D2	cpne3	Copine III
						F1RDF4
						F8W4C7	emilin1b	Elastin microfibril interfacer 1b
						F1Q9I7	snx1a snx1	Sorting nexin 1a
						F1Q9K1	smarcc1a	SWI/SNF-related, matrix-associated, actin-dependent regulator of chromatin, subfamily c, member 1a
						F1Q9N0	apom	Apolipoprotein M (Fragment)
						F1Q9S3	zgc:66479	Zgc:66479
						F1Q9U6	adssl	Adenylosuccinate synthetase (AMPSase) (AdSS) (EC 6.3.4.4) (IMP--aspartate ligase)
						F1Q9Z1	si:ch211-202f3.3 im:7154842	Si:ch211-202f3.3 (Fragment)
						F1QA18	hesx1	HESX homeobox 1
						F1QA55	vrk1	Serine/threonine-protein kinase VRK1
						F1QAA3	zgc:153659	Zgc:153659
						F1QAA7	acss2	Acyl-CoA synthetase short chain family member 2
						F1QAF8	lrrc47	Leucine-rich repeat-containing 47 (Fragment)
						F1QAH5	crybg1a	Crystallin beta-gamma domain-containing 1a
						F1QAJ7	slc25a3b	Solute carrier family 25 member 3b
						F1QAK5	nt5c2b	5'-nucleotidase, cytosolic IIb
						F1QAM8	vim	Vimentin
						F1QAP2	aprt	Adenine phosphoribosyltransferase
						F1QAU9	wu:fi04e12	Wu:fi04e12
						F1QB08	baiap2a	BAI1-associated protein 2a
						F1QB21	decr1	2,4-dienoyl CoA reductase 1, mitochondrial
						F1QB47	eif5b	Eukaryotic translation initiation factor 5B
						F1QB50	tmpob	Thymopoietin b
						F1QB53	kpna1	Karyopherin alpha 1 (importin alpha 5) (Fragment)
						F1QB54	pabpc1a	Polyadenylate-binding protein (PABP)
						F1QB82	sts	Steroid sulfatase (microsomal), isozyme S
						F1QB90	tp53rk	TP53-regulating kinase
						F1QBB1
						F1QBE9	ccl25b	Chemokine (C-C motif) ligand 25b
						F1QBH0	olfml3a	Olfactomedin-like protein 3A
						Q5M7Y2	araf zgc:92074	A-Raf proto-oncogene, serine/threonine kinase (Zgc:92074 protein)
						F1QBM2	pdcd4a	Programmed cell death 4a
						F1QBQ6	zgc:56585	Zgc:56585
						F1QBS1	si:dkey-156n14.5	Si:dkey-156n14.5
						F1QBS7	sult2st1	Sulfotransferase (EC 2.8.2.-)
						F1QBW8	zgc:194398	Zgc:194398
						F1QBZ6	gsto2	Glutathione S-transferase omega 2
						F1QC03	zyx	Zyxin
						F1QC05	ephx1	Epoxide hydrolase (EC 3.3.2.9)
						F1QC06	itga2.2 si:dkey-27b3.9	Integrin, alpha 2 (CD49B, alpha 2 subunit of VLA-2 receptor), tandem duplicate 2
						F1QC34	rpn2	Ribophorin II
						F1QC84	f13a1a.1	Coagulation factor XIII, A1 polypeptide a, tandem duplicate 1
						F1QCD4	got2b	Aspartate aminotransferase (EC 2.6.1.1)
						F1QCE3	prdx5	Peroxiredoxin (EC 1.11.1.15)
						F1QCE9	ndufab1b ndufab1	Acyl carrier protein
						F1QCK5	abi3b	ABI family, member 3b
						F1QCR7	nefma	Neurofilament, medium polypeptide a
						F1QCT6	plaa	Phospholipase A2-activating protein
						F1QCW3	si:ch211-107o10.3	Si:ch211-107o10.3
						F1QD61	mtrex skiv2l2	Mtr4 exosome RNA helicase
						F1QDA2	napsa	Zgc:63831
						F1QDD9	gfpt1	Glutamine--fructose-6-phosphate transaminase 1 (Glutamine-fructose-6-phosphate transaminase 1)
						F1QDJ9	srp72	Signal recognition particle subunit SRP72
						F1QDL1	col1a1b	Collagen, type I, alpha 1b
						F1QDQ1	copa	Coatomer subunit alpha
						F1QDQ5	manf	Mesencephalic astrocyte-derived neurotrophic factor
						F1QDZ4	tyr	Tyrosinase
						F1QE09	spag7	Sperm-associated antigen 7 homolog
						F1QE13	exoc8	Exocyst complex component 8
						F1QE25	naa15a	N(alpha)-acetyltransferase 15, NatA auxiliary subunit a
						F1QE31	psme4b	Proteasome activator complex subunit 4B
						F1QE37	sirt2	NAD-dependent protein deacetylase (EC 3.5.1.-)
						F1QE62	hibadhb	3-hydroxyisobutyrate dehydrogenase (HIBADH) (EC 1.1.1.31)
						F1QEB3	actr3	Actin-related protein 3
						F1QEB4	ssrp1a	FACT complex subunit SSRP1
						F1QEC9	tyrp1a	Tyrosinase-related protein 1a
						F1QEJ3	ephb1	EPH receptor B1
						F1QEJ5	uqcrq	Ubiquinol-cytochrome c reductase, complex III subunit VII
						F1QEJ6	rab3gap2	RAB3 GTPase-activating protein subunit 2 (non-catalytic)
						F1QET7	fscn1a fscn1	Fascin
						F1QEW3	kpna4	Importin subunit alpha
						F1QEY8	phgdh	D-3-phosphoglycerate dehydrogenase (EC 1.1.1.95)
						F1QF00	pgm1	Phosphoglucomutase 1
						F1QF15	actr2a	Actin-related protein 2
						F1QF68	ppwd1	Peptidylprolyl isomerase domain and WD repeat-containing 1
						F1QFC0	hspa9	Heat shock protein 9
						F1QFG2	papss2a	3'-phosphoadenosine 5'-phosphosulfate synthase 2a
						F1QFJ8
						F1QFK9	cstf1	Cleavage stimulation factor, 3' pre-RNA, subunit 1
						F1QFN3	larsb	Leucyl-tRNA synthetase b
						F1QFP1	copz1	Coatomer protein complex, subunit zeta 1
						F1QFQ6	dlst	Dihydrolipoamide S-succinyltransferase
						F1QFQ7	acadsb	Acyl-CoA dehydrogenase short/branched chain
						F1QFV2	hnrnpa1b hnrnpa1	Heterogeneous nuclear ribonucleoprotein A1b
						F1QFV6	rpl28	Ribosomal protein L28
						F1QG52	zgc:113307	Zgc:113307
						F1QG80	rpl22	Ribosomal protein L22
						F1QGG3
						F1QGH8	sh3glb1a	SH3-domain GRB2-like endophilin B1a
						F1QGH9	psmd11b	26S proteasome non-ATPase regulatory subunit 11B (26S proteasome regulatory subunit RPN6-B)
						F1QGJ3	zgc:77486	Perilipin
						F1QGP1	aldh16a1	Aldehyde dehydrogenase 16 family, member A1
						F1QGS9	gusb	Beta-glucuronidase (EC 3.2.1.31)
						F1QGW6	eif2s3	Eukaryotic translation initiation factor 2 subunit 3 (Eukaryotic translation initiation factor 2 subunit gamma) (eIF-2-gamma)
						F1QH31	zgc:153284	Zgc:153284
						F1QH99	acp1	Acid phosphatase 1
						F8W5K2	bnip2	BCL2-interacting protein 2 (Fragment)
						F1QHC4	lmnb1	Lamin B1
						F1QHE5	psmd14	Proteasome 26S subunit, non-ATPase 14
						F1QHG2	zgc:101810	Zgc:101810
						F1QHG3	zgc:173729	Zgc:173729
						F1QHJ3	gna13b	Guanine nucleotide-binding protein (G protein), alpha 13b
						F1QHK0	pgm3	Phosphoacetylglucosamine mutase (PAGM) (EC 5.4.2.3) (Acetylglucosamine phosphomutase) (N-acetylglucosamine-phosphate mutase)
						F1QHR0	apoa4b.1	Apolipoprotein A-IV b, tandem duplicate 1
						F1QHT9	ddx19	DEAD/H (Asp-Glu-Ala-Asp/His) box polypeptide 19 (DBP5 homolog, yeast)
						F1QHY3	birc6	Baculoviral IAP repeat-containing 6
						F1QHZ1	rad23aa	RAD23 homolog A, nucleotide excision repair protein a
						F1QI59	ppp1cb	Serine/threonine-protein phosphatase (EC 3.1.3.16)
						F1QI68	nt5c1bb	5'-nucleotidase, cytosolic IB b
						F1QI99	srp68	Signal recognition particle subunit SRP68 (SRP68)
						F1QIC0	cbsb	Cystathionine beta-synthase (EC 4.2.1.22)
						F1QII8	eif3k EIF3K EIF3S12	Eukaryotic translation initiation factor 3 subunit K (eIF3k) (Eukaryotic translation initiation factor 3 subunit 12) (eIF-3 p25)
						F1QIJ3	lamc2	Laminin, gamma 2
						F1QIJ6	eps15 si:ch73-22b20.2	Epidermal growth factor receptor pathway substrate 15
						F1QIL6	acad9	Acyl-CoA dehydrogenase family, member 9
						F1QIQ2	bag6	BCL2-associated athanogene 6
						F1QJ75	cyb5r1	NADH-cytochrome b5 reductase (EC 1.6.2.2)
						F1QJ77	rabggta	Rab geranylgeranyltransferase subunit alpha
						F1QJB5	bin2b	Bridging integrator 2b
						F1QJC1	dhrs9	Dehydrogenase/reductase (SDR family) member 9
						F1QJD1
						F1QJK0	myo1eb	Myosin IE, b
						F1QJK2	sept8a	Septin-8-A
						F1QJM2
						F1QJR6	tm9sf5	Transmembrane 9 superfamily member
						F1QJU0	wu:fc21g02	Wu:fc21g02
						F1QJV7	ddt	D-dopachrome tautomerase
						F1QJX7	gnas	GNAS complex locus
						F1QJY4	trim35-28	Tripartite motif-containing 35-28
						F1QJZ3	agmat	Agmatine ureohydrolase (agmatinase)
						F1QJZ6	tmod2	Tropomodulin 2
						F1QK53
						F1QK60	krt4	Keratin 4
						F1QK92	uqcc1 uqcc	Ubiquinol-cytochrome c reductase complex assembly factor 1
						F1QKC0	smu1a smu1	SMU1, DNA replication regulator and spliceosomal factor a
						F1QKE8	col6a3	Collagen, type VI, alpha 3 (Fragment)
						F1QKF2	atp2b4	Calcium-transporting ATPase (EC 7.2.2.10)
						F1QKH2	dmgdh	Dimethylglycine dehydrogenase
						F1QKK8	si:ch1073-459j12.1	Si:ch1073-459j12.1
						F1QKL1	thbs3a	Thrombospondin-3a
						F1QKS4	canx	Calnexin
						F1QKW3	lama5	Laminin, alpha 5
						F1QL05	pcmtl	Protein-L-isoaspartate O-methyltransferase (EC 2.1.1.77)
						F1QL34	nudt9	Nudix (nucleoside diphosphate-linked moiety X)-type motif 9
						F1QLC5	sf3b2 zgc:136773	Splicing factor 3b, subunit 2 (Zgc:136773 protein)
						F1QLS7	ppcs	Phosphopantothenoylcysteine synthetase
						F1QLT9	rars	Arginyl-tRNA synthetase
						F1QLW3	pir	Pirin
						F1QM42	aco1	Aconitase 1, soluble
						F1QM43	hddc3	Guanosine-3',5'-bis(diphosphate) 3'-pyrophosphohydrolase MESH1
						F1QM86	cbx1a	Chromobox homolog 1a (HP1 beta homolog Drosophila)
						F1QMC3	sept7b	Septin 7b
						F1QMG9	si:dkey-21e2.8	Si:dkey-21e2.8 (Fragment)
						F8W305
						F1QMY2
						F1QN09	trim108	Tripartite motif-containing 108
						F1QN42	si:dkey-240h12.4	Si:dkey-240h12.4
						F1QN72	gsto1	Glutathione S-transferase omega 1
						F1QNB3
						F1QNF2	cbx3a	Chromobox homolog 3a (HP1 gamma homolog, Drosophila)
						F1QNI2	crlf3	Cytokine receptor-like factor 3
						F1QNJ3	tes	Testis-derived transcript (3 LIM domains)
						F1QNV4	nup133	Nucleoporin 133
						F1QNX9	smfn	Small fragment nuclease
						F1QNY5	cpne1	Copine I
						Q6P6E2	rps26	40S ribosomal protein S26
						F1QP99	zgc:77086	Protein disulfide-isomerase (EC 5.3.4.1)
						F1QQQ3	vtg3	Vitellogenin 3, phosvitinless
						F1QPE4	sra1	Steroid receptor RNA activator 1
						F1QPF7	cth	Cystathionase (cystathionine gamma-lyase)
						F1QPJ6	zgc:152830	Zgc:152830
						F1QPL7	pcca	Propionyl-CoA carboxylase subunit alpha (Fragment)
						F1QPQ4	diaph2	Diaphanous-related formin 2
						F1QPT3	gmds	GDP-mannose 4,6-dehydratase
						F1QPV5
						F1QQ30
						F1QQD3	cab39l1	Calcium-binding protein 39,-like 1
						F1QQG8	tnikb	TRAF2 and NCK-interacting kinase b
						F1QQI6
						F1QQL4	si:ch211-125o16.4	Si:ch211-125o16.4
						F1QQQ5	gsnb	Gelsolin b
						F1QQT3	lims1	LIM domain-containing protein
						F1QQU8	bccip	Protein BCCIP homolog
						F1QQZ1	sf3b1	Splicing factor 3b, subunit 1
						F1QR17	aldh7a1	Aldehyde dehydrogenase 7 family, member A1
						F1QRA8	paplnb	Papilin b, proteoglycan-like sulfated glycoprotein
						F1QRD9
						F1QRM9	npepps	Aminopeptidase (EC 3.4.11.-)
						F1QRX2	sumo3b	Small ubiquitin-related modifier (SUMO)
						F1QS28	hnrnpa0a	Heterogeneous nuclear ribonucleoprotein A0a
						F1QS51	eea1	Early endosome antigen 1
						F1QS72	zgc:163079	Zgc:163079
						F1QSB8	ddx42	DEAD (Asp-Glu-Ala-Asp) box helicase 42
						F1QSF0
						F1QSK1	parp3	Poly [ADP-ribose] polymerase (PARP) (EC 2.4.2.-)
						F1QSP8	prdx4	Peroxiredoxin 4
						F1QSQ0	dsc2l	Desmocollin 2-like
						F1QSU4
						F1QSV8	elmo3	Engulfment and cell motility 3
						F1QSX8	lpp	LIM domain-containing preferred translocation partner in lipoma
						F1QSY7	iars	Isoleucyl-tRNA synthetase
						F1QSZ2	plrg1	Pleiotropic regulator 1
						F1QT60	viml	Vimentin-like
						F1QT63	sarnp	SAP domain-containing ribonucleoprotein
						F1QT86	col5a2a	Collagen, type V, alpha 2a (Fragment)
						F1QTB5	rpn1	Dolichyl-diphosphooligosaccharide--protein glycosyltransferase subunit 1
						F1QTI1	clic2	Chloride intracellular channel protein
						F1QTL9	hnrnpa0b	Heterogeneous nuclear ribonucleoprotein A0b
						F1QTT3	jupa jup	Junction plakoglobin a
						F1QU45	bco2a	Beta-carotene oxygenase 2a
						F1QU55	bhmt	Betaine--homocysteine S-methyltransferase 1
						F1QUD0	ptmaa	Prothymosin alpha-A
						F1QUE3	uqcrc1	Ubiquinol-cytochrome c reductase core protein 1
						F1QUM3
						F1QUP1	rpz	Protein rapunzel
						F1QUQ0	iars2	Isoleucyl-tRNA synthetase 2, mitochondrial
						F1QUV7	gars	Glycyl-tRNA synthetase
						F1QUW4	hyou1	Hypoxia up-regulated protein 1
						F1QV13	gga1	Golgi-associated, gamma adaptin ear-containing, ARF-binding protein 1
						F1QV15	vtg6 si:rp71-23d18.1	Vitellogenin 6 (Fragment)
						F1R5A5	krt5	Keratin 5
						F1QV56	zgc:92313	Zgc:92313
						F1QVB1	ptgr1	Prostaglandin reductase 1
						F1QVC6	srsf9	Serine and arginine-rich-splicing factor 9
						F1QVG0	ano10b	Anoctamin
						F1QVP9
						F1QVT4	fam169aa	Family with sequence similarity 169 member Aa
						F1QVV4	cpsf2	Cleavage and polyadenylation specificity factor subunit 2 (Cleavage and polyadenylation specificity factor 100 kDa subunit)
						F1QVW1	mars	Methionyl-tRNA synthetase
						X1WF87
						F1QW18	itpr2	Inositol 1,4,5-trisphosphate receptor, type 2 (Fragment)
						F1QWB4	hnrnpk	Heterogeneous nuclear ribonucleoprotein K
						F1QWD0	fuca2	Alpha-L-fucosidase (EC 3.2.1.51)
						F1QWF1	si:dkey-40c11.2	Si:dkey-40c11.2
						F1QWP0	cstf2	Cleavage stimulation factor, 3' pre-RNA, subunit 2
						F1QWS5	si:ch211-166a6.5	Si:ch211-166a6.5 (Fragment)
						F1QWX4	spra	Sepiapterin reductase a
						F1QX13	c3a.3 c3c	Complement component c3a, duplicate 3
						F1QX19	zmpste24	CAAX prenyl protease (EC 3.4.24.84)
						F1QXC3	arl9	ADP-ribosylation factor-like 9
						F1QXD5	col10a1a	Collagen, type X, alpha 1a
						F1QXK1	si:ch211-207d6.2	Si:ch211-207d6.2
						F1QXP5	mthfd1b	Methylenetetrahydrofolate dehydrogenase (NADP+-dependent) 1b
						F1QXP8	khsrp	KH-type-splicing regulatory protein
						F1QXV8	pgk1	Phosphoglycerate kinase (EC 2.7.2.3)
						F1QY00	nmt1a	Glycylpeptide N-tetradecanoyltransferase (EC 2.3.1.97)
						F1QY25	zgc:162509	Zgc:162509
						F1QY27	h1fx	H1 histone family, member X
						F1QY29	prelp	Proline/arginine-rich end leucine-rich repeat protein
						F1QY34	lrp1ab lrp1	Low density lipoprotein receptor-related protein 1Ab
						F1QY65	prpf6 c20orf14	C20orf14 homolog (H. sapiens) (PRP6 pre-mRNA-processing factor 6 homolog (S. cerevisiae))
						F1QYJ6	sult6b1	Sulfotransferase 6B1 (EC 2.8.2.-) (Thyroxine sulfotransferase) (EC 2.8.2.n2)
						F1QYK9	myl9a	Myosin, light chain 9a, regulatory
						F1QYM0	trim16	Tripartite motif-containing 16 (Fragment)
						F1QYM4	eif4h	Eukaryotic translation initiation factor 4h
						F1QYS7	acss1	Acetyl-coenzyme A synthetase (EC 6.2.1.1)
						F1QYT2	sqor sqrdl	Sulfide quinone oxidoreductase
						F1QYT3	apbb1ip	Amyloid beta A4 precursor protein-binding family B member 1-interacting protein
						F1QYU0	lama4	Laminin, alpha 4
						F1QYW8	nap1l4a	Nucleosome assembly protein 1-like 4a
						F1QYX8	hadhab	Hydroxyacyl-CoA dehydrogenase trifunctional multienzyme complex subunit alpha b
						F1QZ09	aclya	ATP-citrate synthase (EC 2.3.3.8) (ATP-citrate (pro-S-)-lyase) (Citrate cleavage enzyme)
						F1QZ15	tprkb	EKC/KEOPS complex subunit TPRKB (PRPK-binding protein) (TP53RK-binding protein)
						F1QZ45
						F1QZ50	ahnak	AHNAK nucleoprotein
						F1QZ60	xrcc6	X-ray repair-complementing defective repair in Chinese hamster cells 6
						F1QZ78	gmppab	Mannose-1-phosphate guanyltransferase alpha-B
						F1QZA4	idh3g	Isocitrate dehydrogenase [NAD] subunit, mitochondrial
						F1QZA5	psmd6	Proteasome 26S subunit, non-ATPase 6
						F1QZB0	crip2	Cysteine-rich protein 2
						F1QZG1	myof	Myoferlin
						F1QZL6	gpia	Glucose-6-phosphate isomerase (EC 5.3.1.9)
						X1WH59	si:ch211-212c13.10	Si:ch211-212c13.10
						F1QZU1	tnks1bp1	Tankyrase 1-binding protein 1
						F1QZU5	ptpn11a ptpn11	Tyrosine-protein phosphatase non-receptor type (EC 3.1.3.48)
						F1QZW7	ilf3a	Interleukin enhancer-binding factor 3a
						F1R0C0	pgls	6-phosphogluconolactonase (6PGL) (EC 3.1.1.31)
						F1R0C4	rmdn1	Regulator of microtubule dynamics 1
						F1R0N0	lrrc17	Leucine-rich repeat-containing 17
						F1R0Z8	pfdn4 si:dkey-222e15.2	Prefoldin subunit 4
						F1R182	aimp2	Aminoacyl tRNA synthetase complex-interacting multifunctional protein 2
						F1R184	txndc5	Thioredoxin domain-containing 5
						F1R187	abi1a	Abl-interactor 1a
						F1R1C0	acsf2	Acyl-CoA synthetase family member 2, mitochondrial
						F1R1E9	ube2v1	Ubiquitin-conjugating enzyme E2 variant 1
						F1R1J3	zgc:86599	Zgc:86599 (Fragment)
						F1R1N9	cd2ap cd2apl	CD2-associated protein
						F1R1P6	nansa	N-acetylneuraminic acid synthase a
						F1R1P9	thbs4b	Thrombospondin-4-B
						F1R1R7	f13a1b	Coagulation factor XIII, A1 polypeptide b
						F1R1W1	strn3	Striatin, calmodulin-binding protein 3
						F1R1W8	aatf	Apoptosis-antagonizing transcription factor
						F1R246	dars	Aspartyl-tRNA synthetase
						F1R264
						F1R293	adsl	Adenylosuccinate lyase (ASL) (EC 4.3.2.2) (Adenylosuccinase)
						F1R2J2	arhgap1	Rho GTPase-activating protein 1
						F1R3T3	ddx1	DEAD (Asp-Glu-Ala-Asp) box helicase 1
						F1R2Q8	si:dkey-34l15.1	Si:dkey-34l15.1
						F1R2S5	vtg5	Vitellogenin 5 (Fragment)
						F1R2T3	vtg7	Vitellogenin 7
						F1R2V0	aoc2	Amine oxidase (EC 1.4.3.-) (Fragment)
						F1R2W1	dhrs13a.3 dhrs13	Dehydrogenase/reductase (SDR family) member 13a, duplicate 3
						F1R300	snrpa1	Small nuclear ribonucleoprotein polypeptide A'
						F1R314	zgc:110425	Zgc:110425
						F1R319	slc25a11	Solute carrier family 25 member 11
						F1R378	nenf	Neudesin neurotrophic factor
						F1R3D3	gapdhs	Glyceraldehyde-3-phosphate dehydrogenase (EC 1.2.1.12)
						F1R3F7	c1qbp	Complement component 1, q subcomponent-binding protein
						F1R3G8	srm	Spermidine synthase
						F1R3H1	rpz4	Rapunzel 4
						F1R3I6	setb	SET nuclear proto-oncogene b
						F1R3J9	prmt1	Protein arginine methyltransferase 1
						F1R3T4	galk1	Galactokinase 1
						F1R3X2	mcts1	Malignant T-cell-amplified sequence
						F1R444	prkcaa prkca	Protein kinase C (EC 2.7.11.13)
						F1R446	sptan1 spna2	Spectrin alpha, non-erythrocytic 1
						F1R454	ca2	Carbonic anhydrase II
						F1R4A7	guk1a zgc:86776	Guanylate kinase 1a (Zgc:86776)
						F1R4B7	usp14	Ubiquitin-specific peptidase 14 (tRNA-guanine transglycosylase)
						F1R4C3
						F1R4C8	ndufs3	NADH:ubiquinone oxidoreductase core subunit S3
						F1R4G2	blmh	Bleomycin hydrolase
						F1R4I7	sri	Sorcin
						F1R4S7	ak3 AK3	GTP:AMP phosphotransferase AK3, mitochondrial (EC 2.7.4.10) (Adenylate kinase 3) (AK 3)
						F1R4U0	slc25a1b	Slc25a1 solute carrier family 25 member 1b
						F1R5C2	acot9.1	Acyl-CoA thioesterase 9, tandem duplicate 1
						F1R5G2	nxn	Nucleoredoxin
						F1R5X0	pygb	Alpha-1,4 glucan phosphorylase (EC 2.4.1.1)
						F1R611	ndufab1a	Acyl carrier protein
						F1R653	hdac1	Histone deacetylase (EC 3.5.1.98)
						F1R665	cavin2b sdprb	Caveolae-associated protein 2b
						F1R676	pofut1	Protein O-fucosyltransferase 1
						F1R6B8	ptgdsb.2	Prostaglandin D2 synthase b, tandem duplicate 2
						F1R6E5	rad23b	RAD23 homolog B, nucleotide excision repair protein
						F1R6F6	grk5l	G protein-coupled receptor kinase (EC 2.7.11.-)
						F1R6G3	lum	Lumican (Fragment)
						F1R6L4	cirbpb	Cold-inducible RNA-binding protein b (Fragment)
						F1R6L8	arhgap17b	Rho GTPase-activating protein 17b
						F1R6R1	acin1a	Apoptotic chromatin condensation inducer 1a (Fragment)
						F1R6R2	si:ch211-270n8.1	Si:ch211-270n8.1 (Fragment)
						F1R776	dcps	Decapping enzyme, scavenger
						F1R7A2	fam129bb	Family with sequence similarity 129 member Bb
						F1R7F6	uggt1	UDP-glucose glycoprotein glucosyltransferase 1
						F1R7L3	bysl	Bystin-like (Fragment)
						F1R7S1	cope	Coatomer subunit epsilon
						X1WFN0	eml2	EMAP-like 2 (Fragment)
						F1R7W0	col17a1b	Collagen, type XVII, alpha 1b
						F1R7X5	suclg2 SUCLG2	Succinate--CoA ligase [GDP-forming] subunit beta, mitochondrial (EC 6.2.1.4) (GTP-specific succinyl-CoA synthetase subunit beta) (G-SCS) (GTPSCS) (Succinyl-CoA synthetase beta-G chain) (SCS-betaG)
						F1R826	gstt1b	Glutathione S-transferase theta 1b
						F1R833	nrap	Nebulin-related-anchoring protein
						F1R861	samhd1 si:dkeyp-44b8.8	Deoxynucleoside triphosphate triphosphohydrolase SAMHD1
						F1R886	cfb	Complement factor B
						F1R8A9
						F1R8B4	gcn1 gcn1l1	GCN1 eIF2 alpha kinase activator homolog
						F1R8J6	ppt1	Palmitoyl-protein thioesterase 1 (ceroid-lipofuscinosis, neuronal 1, infantile)
						F1R8L3	rpz5	Rapunzel 5
						F1R8M8	rsl1d1 si:dkey-16i5.10	Ribosomal L1 domain-containing 1
						F1R8N2	sb:cb37	Sb:cb37 (Fragment)
						F1R8Q3	lrrc59	Leucine-rich repeat-containing protein 59
						F1R8R0	si:zfos-1897c11.1	Si:zfos-1897c11.1
						F1R8S3	plcd1b	Phosphoinositide phospholipase C (EC 3.1.4.11)
						F1R8U0	krt94	Keratin 94
						F1R916	zgc:66473	Zgc:66473
						F1R984	ubr4	Ubiquitin protein ligase E3 component n-recognin 4 (Fragment)
						F1R9A9	serpinb1l1	Serpin peptidase inhibitor, clade B (ovalbumin), member 1,-like 1
						F1R9B8	si:ch211-241e1.3	Si:ch211-241e1.3 (Fragment)
						F1R9C6	phb2b	Prohibitin 2b
						F1R9P5
						F1R9W9
						F1R9Y1	col14a1a col14a1	Collagen, type XIV, alpha 1a
						F1R9Y5	pck2	Phosphoenolpyruvate carboxykinase 2 (mitochondrial)
						F1R9Y8	hdlbpa hdlbp	High density lipoprotein-binding protein a
						F1R9Y9
						F8W3K1	eif3ja	Eukaryotic translation initiation factor 3 subunit J-A (Fragment)
						F1RA51	itgb4	Integrin beta
						F1RA91	asl	Argininosuccinate lyase
						F1RAA2	mapk14b	Mitogen-activated protein kinase (EC 2.7.11.24)
						F1RAE9	stxbp2	Syntaxin-binding protein 2
						F1RAG3	nid1a	Nidogen 1a
						F1RAM4	zgc:110339	Zgc:110339
						F1RAM9	tmed7	Transmembrane p24-trafficking protein 7
						F1RAN8	rap1gds1	Uncharacterized protein
						F1RAP6	serpinf2b	Serpin peptidase inhibitor, clade F (alpha-2 antiplasmin, pigment epithelium-derived factor), member 2b
						F1RAQ5	necap2	NECAP endocytosis-associated 2
						F1RAV5	rps6ka1	Ribosomal protein S6 kinase (EC 2.7.11.1)
						F1RAV6	acin1a	Apoptotic chromatin condensation inducer 1a
						F1RB32	arfgap2	ADP-ribosylation factor GTPase-activating protein 2
						F1RB70	chid1	Chitinase domain-containing protein 1
						F1RB89	dync1li2	Dynein, cytoplasmic 1, light intermediate chain 2
						F1RB94	u2af1	U2 small nuclear RNA auxiliary factor 1
						F1RBA4
						F1RBF9	gorasp2	Golgi reassembly-stacking protein 2
						F1RBG8
						F1RBN6	ethe1	Ethylmalonic encephalopathy 1
						F1RBR0	eif2b5	Eukaryotic translation initiation factor 2B, subunit 5 epsilon
						F1RBR6	pter	Phosphotriesterase-related protein
						F1RBS6	nme2b.1	Nucleoside diphosphate kinase (EC 2.7.4.6)
						F1RBT2	chd4b	Chromodomain helicase DNA-binding protein 4b
						F1RBU6	aifm1 pdcd8	Apoptosis-inducing factor, mitochondrion-associated 1
						F1RBZ6	eps8l1a eps8l1	Eps8-like 1a
						F1RCA1	uba1	Ubiquitin-like modifier-activating enzyme 1
						F1RCB2	ddx3xb ddx3b pl10	DEAD-box helicase 3 X-linked b
						F1RCG2	ptges3b	Prostaglandin E synthase 3b (cytosolic)
						F1RCG7	fkbp4	Peptidylprolyl isomerase (EC 5.2.1.8)
						F1RCJ4	capn9	Calpain 9
						F1RCM3	psmb6	Proteasome subunit beta (EC 3.4.25.1)
						F1RCP2	osbpl7	Oxysterol-binding protein
						F1RCY6	upf1	UPF1, RNA helicase and ATPase
						F1RD50	zgc:112962	Zgc:112962
						F1RD77	npm1b	Nucleophosmin 1b (Fragment)
						F1RDA6	ndufs1 ino80db	INO80 complex subunit D-B (NADH:ubiquinone oxidoreductase core subunit S1)
						F1RDG4	si:dkey-222f2.1	Si:dkey-222f2.1
						F1RDP7	lxn	Latexin
						F1RDQ9	ctsz	Cathepsin Z
						F1RDR2	mrps27	Mitochondrial ribosomal protein S27
						F1RDT4	atp6v1e1a	ATPase H+-transporting V1 subunit E1a
						F1RDU8	si:dkey-65b12.6	Si:dkey-65b12.6
						F1RDV2	ndufa10	NADH dehydrogenase [ubiquinone] 1 alpha subcomplex subunit 10, mitochondrial
						F1RDX1	auh	AU RNA-binding protein/enoyl-CoA hydratase
						F1RDZ1	rab11al	RAB11a, member RAS oncogene family,-like
						F1RE72	zgc:153317	Zgc:153317
						F1RE77	vrk3	VRK serine/threonine kinase 3
						F1REE8	trip11	Thyroid hormone receptor interactor 11
						F1REH8	anxa13	Annexin
						F1REL9	lamb1b	Laminin, beta 1b
						F2Z4U3	wls	Wnt ligand secretion mediator
						F5H8N4	lrpprc	Leucine-rich pentatricopeptide repeat-containing
						F6NJS4	atl2	Atlastin GTPase 2
						Q641M4	zgc:100918	Zgc:100918
						F6NLI6	ppib	Peptidyl-prolyl cis-trans isomerase (PPIase) (EC 5.2.1.8)
						Q9DEA0	runx3	Runt-related transcription factor
						F6NMD4	si:ch211-288g17.4	Si:ch211-288g17.4
						F6NP87	ndufa9a	NADH:ubiquinone oxidoreductase subunit A9a
						F6NPA4	col5a1	Procollagen, type V, alpha 1 (Fragment)
						F6NRG0	col6a3	Collagen, type VI, alpha 3 (Fragment)
						F6NTZ9	a2ml	Alpha-2-macroglobulin-like (Fragment)
						F6NXD5	marcksb	Myristoylated alanine-rich protein kinase C substrate b
						F6NXE7	cpsf1	Cleavage and polyadenylation-specific factor 1
						I3ISJ2	uqcrh	Cytochrome b-c1 complex subunit 6
						F6P2R4	gcat	Glycine C-acetyltransferase
						Q7SZ53	crp2 si:ch211-234p6.13	Pentaxin (Pentraxin)
						F6P3G4	psmd11a	26S proteasome non-ATPase regulatory subunit 11A (26S proteasome regulatory subunit RPN6-A)
						F6P480	lad1	Ladinin
						F6P873	atp5mf atp5j2	ATP synthase membrane subunit f
						F6PAM1	gna11a	Guanine nucleotide-binding protein (G protein), alpha 11a (Gq class)
						F6PCD2	si:ch211-197g15.6	Si:ch211-197g15.6
						F6PD25	zfr2	Zinc finger RNA-binding protein 2 (Fragment)
						F6PEJ8	sc:d0202	Sc:d0202
						F8W2M8	tpp1	Tripeptidyl-peptidase 1 (TPP-1) (EC 3.4.14.9) (Tripeptidyl aminopeptidase) (Tripeptidyl-peptidase I) (TPP-I)
						F8W2P1	arl8a si:ch1073-204j4.2	ADP-ribosylation factor-like 8A
						F8W2V6	idh3b	Isocitrate dehydrogenase [NAD] subunit, mitochondrial
						F8W3K6	exosc2	Exosome component 2
						F8W442	gnao1a	Guanine nucleotide-binding protein (G protein), alpha-activating activity polypeptide O, a
						F8W475	serpinb1l4	Serpin peptidase inhibitor, clade B (ovalbumin), member 1,-like 4
						F8W4A0	myo5ab	Myosin VAb (Fragment)
						F8W4C1	mbpb si:dkey-241k19.2	Myelin basic protein b
						F8W4C4	usp5	Ubiquitin carboxyl-terminal hydrolase (EC 3.4.19.12)
						F8W4M7	aco2	Aconitate hydratase, mitochondrial (Aconitase) (EC 4.2.1.-) (Fragment)
						F8W4Q1	dspa	Desmoplakin a
						F8W4V7	arpp19b	cAMP-regulated phosphoprotein 19b
						F8W4Z6	porb POR	NADPH--cytochrome P450 reductase (CPR) (P450R) (EC 1.6.2.4)
						F8W539	wu:fj11g02	Wu:fj11g02
						F8W573	gna14	Guanine nucleotide-binding protein (G protein), alpha 14
						F8W5C6	snx6	Sorting nexin
						F8W5T8
						G1K2E7	cdh2	Cadherin-2
						G1K2P5	esrp2	Epithelial-splicing regulatory protein 2
						G1K2R9	fam83hb si:ch211-199g17.1	Family with sequence similarity 83 member Hb
						H0WES8	atp5md si:dkeyp-80c12.10	ATP synthase membrane subunit DAPIT
						H0WF44	b2m	Beta-2-microglobulin
						H9GX78	actn4	Actinin, alpha 4
						H9GXL1	zmp:0000001114	Zmp:0000001114
						I3IRW7	abat	4-aminobutyrate aminotransferase
						I3ISA6	eppk1	Epiplakin 1
						I3ISP1	pcnt si:ch211-245b3.1	Pericentrin
						I3ISQ1	tpm3	Tropomyosin 3
						I3ISS5	usp7	Ubiquitin-specific peptidase 7 (herpes virus-associated)
						I3IT78	si:ch211-76l23.4	Si:ch211-76l23.4
						I3ITN9	aldh1l1	10-formyltetrahydrofolate dehydrogenase (EC 1.5.1.6)
						I3ITP3	mbpa	Myelin basic protein a
						K7DY99	ttc27	Tetratricopeptide repeat domain 27
						O42248	gnb2l1 rack1	Guanine nucleotide-binding protein subunit beta-2-like 1 (Receptor of activated protein kinase C) (RACK)
						O42363	apoa1 apoa zgc:103718	Apolipoprotein A-I (Apo-AI) (ApoA-I) (Apolipoprotein A1) [Cleaved into: Proapolipoprotein A-I (ProapoA-I)]
						O42364	apoeb apoe	Apolipoprotein Eb (Apo-Eb)
						O42376	mapk12 sapk3	Mitogen-activated protein kinase 12 (MAP kinase 12) (MAPK 12) (EC 2.7.11.24) (Stress-activated protein kinase 3)
						O57330	psmb8a LMP7 psmb8 CH211-51F10.3-001 psmb8-001	Proteasome subunit beta (EC 3.4.25.1)
						O73872	sod1 cuzn	Superoxide dismutase [Cu-Zn] (EC 1.15.1.1)
						Q6NV46	stat3	Signal transducer and activator of transcription
						P59015	vps18	Vacuolar protein sorting-associated protein 18 homolog
						P61485	rpl36a	60S ribosomal protein L36a
						P62084	rps7 zgc:73216	40S ribosomal protein S7
						P62247	rps8	40S ribosomal protein S8
						P79735	ran	GTP-binding nuclear protein Ran (GTPase Ran) (Ras-related nuclear protein)
						Q6DGD1	nras	GTPase NRas (Neuroblastoma RAS viral (V-ras) oncogene homolog)
						P83571	ruvbl2	RuvB-like 2 (EC 3.6.4.12) (Reptin) (zReptin)
						Q08BA1	atp5fa1 atp5a1	ATP synthase subunit alpha
						Q08BB5	ctdspl2a zgc:154017	CTD small phosphatase-like protein 2-A (CTDSP-like 2-A) (EC 3.1.3.-)
						Q08BC5	hsd17b7 zgc:153977	Hydroxysteroid (17-beta) dehydrogenase 7 (Zgc:153977)
						Q08BE3	slmapa zgc:153887	Sarcolemma-associated protein a (Zgc:153887)
						Q08BI9	mcu zgc:153607	Calcium uniporter protein, mitochondrial
						Q08BR1	dr1 zgc:152914	Down-regulator of transcription 1 (Zgc:152914)
						Q08BV5	rangap1a zgc:154097	RAN GTPase-activating protein 1a (Zgc:154097)
						Q08BV6
						Q08C33	isoc1 zgc:153699	Isochorismatase domain-containing protein 1
						Q08C78	btf3	Transcription factor BTF3
						Q08CD8	rhebl1 rheb zgc:153231	Ras homolog, mTORC1-binding-like 1 (Zgc:153231)
						Q0H2G3	aldh1a3 raldh3	Aldehyde dehydrogenase 1 family member A3 (Aldehyde dehydrogenase 1 family, member A3) (RALDH3) (Retinaldehyde dehydrogenase family 1 subfamily A3)
						Q0P4B4	tagln	Transgelin
						Q0P4E8	tomm7 zgc:152998	Translocase of outer mitochondrial membrane 7 homolog (yeast) (Zgc:152998)
						Q0PWB6	pdlim2	PDZ and LIM domain 2 (Mystique)
						Q0PWB8	pdlim3b pdlim3 DKEY-276L17.2-001	PDZ and LIM domain 3b (PDZ-LIM protein ALP)
						Q0PWB9	pdlim4	PDZ and LIM domain 4 (PDZ-LIM protein RIL)
						Q0VFW0	rpl22l1 zgc:136591	Ribosomal protein L22-like 1 (Zgc:136591)
						Q0ZBR7	mif MIF	Macrophage migration inhibitory factor
						Q19U09	itgb1b.2	Integrin beta
						Q1ECW5	dgkaa zgc:136759	Diacylglycerol kinase (DAG kinase) (EC 2.7.1.107)
						Q1ECX9	pdia4	Protein disulfide-isomerase A4 (EC 5.3.4.1)
						Q1JPX3	farsa farsla zgc:136506 zgc:158185	Phenylalanine--tRNA ligase alpha subunit (EC 6.1.1.20) (Phenylalanyl-tRNA synthetase alpha subunit) (PheRS)
						Q1JPY6	pfdn2	Prefoldin subunit 2
						Q1JPZ3	src	Proto-oncogene tyrosine-protein kinase Src (EC 2.7.10.2) (Proto-oncogene c-Src) (pp60c-src) (p60-Src)
						Q1JPZ7	prpf39 si:dz261o22.3	Pre-mRNA-processing factor 39 (PRP39 homolog)
						Q1L8D8	si:rp71-15k1.1	Si:rp71-15k1.1
						Q1L8N2	rad23ab	RAD23 homolog A, nucleotide excision repair protein b
						Q1L8P1	fkbp9	Peptidylprolyl isomerase (EC 5.2.1.8)
						Q1L8R2	sfpq	Splicing factor proline/glutamine-rich
						Q1L8R9	snapin si:dkey-222b8.2	SNARE-associated protein Snapin (Biogenesis of lysosome-related organelles complex 1 subunit 7)
						Q1L8Y7	shoc2 si:ch211-159c12.3 si:ch211-197i12.3	Leucine-rich repeat protein SHOC-2 (Protein soc-2 homolog) (Protein sur-8 homolog)
						Q1L907	gstr gstR1 gstr1 tfa	Glutathione S-transferase rho (Gstr1 protein) (Rho-class glutathione S-transferase)
						Q1L9A1	hnrnpul1	Heterogeneous nuclear ribonucleoprotein U-like 1
						Q1L9A3	ppp1r13l	Protein phosphatase 1, regulatory subunit 13-like
						Q1LUK1	micos13 mic13 qil1 si:dkey-78l4.14	MICOS complex subunit MIC13
						Q1LUT0	nutf2 zgc:101555 DKEY-16N13.5-001	Novel protein similar to vertebrate nuclear transport factor 2 (NUTF2) (Nuclear transport factor 2) (Zgc:101555 protein)
						Q1LUV0	si:ch211-262h13.5	Si:ch211-262h13.5
						Q1LUV5	s100v2	S100 calcium-binding protein V2
						Q1LUZ9	ces3	Carboxylic ester hydrolase (EC 3.1.1.-)
						Q1LV08	nup93 dye	Nuclear pore complex protein Nup93
						Q1LV17	irf2bp1 si:dkey-223n17.3	Interferon regulatory factor 2-binding protein 1 (IRF-2-binding protein 1) (IRF-2BP1)
						Q1LV51	ogna ogn	Osteoglycin, paralog a
						Q1LV81	safb	Scaffold attachment factor B
						Q1LVA5	rab25a rab25 DKEYP-84F11.7-001	Novel protein similar to vertebrate RAB25, member RAS oncogene family (RAB25) (RAB25, member RAS oncogene family a)
						Q1LVB8	si:ch211-51e12.7	Si:ch211-51e12.7
						Q1LVD7	efhd2 si:dkey-72l14.9	EF-hand domain family, member D2 (Si:dkey-72l14.9) (Si:dkey-72l14.9 protein)
						Q1LVE8	sf3b3 zgc:55440	Splicing factor 3B subunit 3
						Q1LVF0	lamc1	Laminin subunit gamma-1
						Q1LVK6	vaspb	Vasodilator-stimulated phosphoprotein b
						Q1LVK8	sec11a	Signal peptidase complex catalytic subunit SEC11 (EC 3.4.21.89)
						Q1LVL2	aars AARS	Alanyl-tRNA synthetase
						Q1LVV3	wasf2	WAS protein family, member 2
						Q1LVV8	smc3	Structural maintenance of chromosomes protein
						Q1LWD2	ric8b synbl DKEY-227K11.4-001	Novel protein (Synembryn-B) (Synembryn-like)
						Q1LWG2	ndufs6	NADH dehydrogenase [ubiquinone] iron-sulfur protein 6, mitochondrial
						Q1LWH1	rps16 si:dkey-66d18.1	Ribosomal protein S16 (Rps16 protein)
						Q1LWN2	vtg1	Vitellogenin 1
						Q1LWY1	psmb13a psmb10 CH211-51F10.4-001	Proteasome subunit beta (EC 3.4.25.1)
						Q1LX26	si:dkey-238c7.16	Si:dkey-238c7.16
						Q1LX53	bcl2l13	BCL2-like 13 (Bcl2l13 protein)
						Q1LX72	synm	Synemin, intermediate filament protein
						Q1LXA7	aspn	Asporin
						Q1LXD4	rbbp4 rbb4 rbb4-2 CH211-210B19.2-001-2	Histone-binding protein RBBP4 (Retinoblastoma binding protein 4)
						Q1LXE1	hapln1a	Hyaluronan and proteoglycan link protein 1a
						Q1LXF9	si:dkey-102c8.3	Si:dkey-102c8.3
						Q1LXJ1	krt17 si:dkeyp-113d7.7	Keratin 17 (Si:dkeyp-113d7.7)
						Q1LXJ9	krtt1c19e	Keratin type 1 c19e
						Q1LXK0	krt1-19d	Keratin, type 1, gene 19d
						Q1LXS2	psmg2 tnfsf5ip1 si:dkey-263o22.1 wu:fb51b11 zgc:73278	Proteasome assembly chaperone 2 (Tumor necrosis factor superfamily member 5-induced protein 1 homolog)
						Q1LY62	map2k2a map2k2	Mitogen-activated protein kinase kinase 2 (Mitogen-activated protein kinase kinase 2a)
						Q1LYB6	atp5if1b atpib atpif1b si:ch211-15d5.5 zgc:153321	ATPase inhibitor B, mitochondrial (ATP synthase F1 subunit epsilon B) (Inhibitor of F(1)F(o)-ATPase B) (IF(1) B) (IF1 B)
						Q1LYB7	rpl13a CH211-154E15.4-001	Ribosomal protein L13a
						Q1LYC9	capns1a	Calpain, small subunit 1 a
						Q1LYD7	ampd3b ampd3	AMP deaminase (EC 3.5.4.6)
						Q1LYG5	eef2a.1	Eukaryotic translation elongation factor 2a, tandem duplicate 1
						Q1LYI0	ubxn6	UBX domain protein 6
						Q1LYJ7	kng1	Kininogen 1
						Q1LYK7	scin	Scinderin
						Q1LYQ0	CH211-31O18.2-001 zgc:162396	Novel protein (Zgc:162396) (Zgc:162396 protein)
						Q1LYQ9	nfs1	NFS1 cysteine desulfurase (NFS1 nitrogen fixation 1 (S. cerevisiae))
						Q1MT41	rbbp9 si:ch211-258l4.7	Si:ch211-258l4.7 (Sirtuin 7)
						Q1MT71	sh3gl1a CH211-281O21.2 CH211-281O21.2-001	Novel protein (Zgc:56637) (SH3-domain GRB2-like 1a) (Sh3gl1a protein)
						Q1MT77	si:ch211-250m6.4	Si:ch211-250m6.4
						Q1MTA9	cpt1aa	Carnitine palmitoyltransferase 1Aa (liver)
						Q1MTC4	vtg2	Vitellogenin 2
						Q1MTC7	si:busm1-266f07.2 DKEYP-2H4.2-001	Novel vertebrate MHC class II alpha chain protein (Si:busm1-266f07.2)
						Q1MTD3	rnmt si:ch211-105d11.3	mRNA cap guanine-N7 methyltransferase (EC 2.1.1.56) (RG7MT1) (mRNA (guanine-N(7)-)-methyltransferase) (mRNA cap methyltransferase)
						Q1MTE5	arl3 sfxn2 si:ch211-208d15.4	ADP-ribosylation factor-like protein 3
						Q1RLR3	krt93 zgc:136902	Keratin 93 (Zgc:136902)
						Q1RLR9
						Q1RLT0	mat2al zgc:136871	S-adenosylmethionine synthase (EC 2.5.1.6)
						Q1RLT1	gmpr2 GMPR zgc:136869	GMP reductase (GMPR) (EC 1.7.1.7) (Guanosine 5'-monophosphate oxidoreductase) (Guanosine monophosphate reductase)
						Q1RLU3	upk1a	Tetraspanin
						Q1RM52	zgc:136439	Zgc:136439
						Q24JV1	rpl32 zgc:136952	Ribosomal protein L32 (Zgc:136952)
						Q24JV3	rpl31 zgc:136896	Ribosomal protein L31 (Zgc:136896)
						Q24JW2	lyz	Lysozyme
						Q29RB4	olfml3a olfml3 zgc:153815	Olfactomedin-like protein 3A
						Q29RF0	dpt DPT zgc:136613	Dermatopontin (Zgc:136613 protein)
						Q2L6L1	cnpy1 d121 si:dkey-265a7.3	Protein canopy-1 (Protein D121)
						Q32PL1	ppp1r7 sds22 zgc:123325	Protein phosphatase 1 regulatory subunit 7 (Protein phosphatase 1 regulatory subunit 22)
						Q32PS5	grpel1	GrpE protein homolog
						Q3B7R0	cyc1	Cytochrome c-1
						Q3ZB92	prkacbb prkacb	Protein kinase, cAMP-dependent, catalytic, beta (Protein kinase, cAMP-dependent, catalytic, beta b)
						Q3ZB95	mpi zgc:110773	Mannose-6-phosphate isomerase (EC 5.3.1.8)
						Q498V7	psph zgc:112414	Zgc:112414
						Q499B2	spcs1	Signal peptidase complex subunit 1 (Signal peptidase complex subunit 1 homolog (S. cerevisiae))
						Q4F876	cnn2	Calponin
						Q4KMC6	c1qtnf5	C1q and TNF-related 5 (C1q and tumor necrosis factor related protein 5)
						Q4L216	afp4 zgc:161979	Antifreeze protein type IV (Type IV antifreeze protein) (Type IV antifreeze protein A) (Zgc:161979)
						Q4V8U8	rab27a zgc:114135	RAB27A, member RAS oncogene family (Zgc:114135)
						Q4V914	h2afy2 zgc:114051	Core histone macro-H2A
						Q4V918	psma3 zgc:114044	Proteasome subunit alpha type (EC 3.4.25.1)
						Q4V9N1	tsn zgc:123170 CH211-168M7.2-001	Novel protein similar to vertebrate translin (TSN) (Translin) (Zgc:123170) (Zgc:123170 protein)
						Q4V9P9	nol11 wu:fb30e03 zgc:109901	Nucleolar protein 11-like
						Q4VBT6	exosc8	Exosome component 8
						Q4VBU0	bckdha	2-oxoisovalerate dehydrogenase subunit alpha (EC 1.2.4.4) (Branched-chain alpha-keto acid dehydrogenase E1 component alpha chain)
						Q4VBU7	cox5aa	Cox5aa protein (Cytochrome c oxidase subunit 5Aa) (Cytochrome c oxidase subunit Vaa)
						Q4VBV2	rps27.1 zgc:109888	40S ribosomal protein S27
						Q4VBV9	nit2 zgc:109720	Omega-amidase NIT2 (EC 3.5.1.3) (Nitrilase homolog 2)
						Q502D1	glod5 zgc:112315	Glyoxalase domain-containing protein 5
						Q502E4	ndufs4 DKEYP-88A5.2 DKEYP-88A5.2-001	NADH dehydrogenase (Ubiquinone) Fe-S protein 4, (NADH-coenzyme Q reductase) (NADH:ubiquinone oxidoreductase subunit S4) (Novel protein (Zgc:112289))
						Q503D3	ptbp1a ptbp1	Polypyrimidine tract-binding protein 1a
						Q503E6	ezra ezrl vil2l	Ezrin a (Ezrin like) (Ezrl protein)
						Q503K1	tgfbi	Transforming growth factor, beta-induced
						Q503L4	iah1 si:dkey-174c12.2	Isoamyl acetate-hydrolyzing esterase 1 homolog (EC 3.1.-.-)
						Q504C0	uchl3	Ubiquitin carboxyl-terminal hydrolase (EC 3.4.19.12)
						Q504E7	szrd1 zgc:109926	SUZ domain-containing protein 1
						Q504F8	pgpep1 zgc:109902	Pyroglutamyl-peptidase I (Zgc:109902) (Zgc:109902 protein)
						Q504J1
						Q52PJ5	dpysl3	Dihydropyrimidinase-related protein 3 (DRP-3) (Collapsin response mediator protein 4) (CRMP-4)
						Q561T3	kctd12.2 ron	Potassium channel tetramerisation domain-containing 12.2 (Righton)
						Q561X9	bdh2 si:dkey-162b23.2 zgc:110323	3-hydroxybutyrate dehydrogenase type 2 (EC 1.1.1.-) (EC 1.1.1.30) (R-beta-hydroxybutyrate dehydrogenase)
						Q561Y1	psmd4b psmd4 psmd4l	Proteasome (Prosome, macropain) 26S subunit, non-ATPase, 4 (Proteasome 26S subunit, non-ATPase 4b)
						Q566N6	zgc:113208	Zgc:113208
						Q566V8	mrpl12	Mitochondrial ribosomal protein L12
						Q566W6	cirbpa zgc:112425	Cold-inducible RNA-binding protein a (Zgc:112425) (Zgc:112425 protein)
						Q566Y8	magoh ch211-216k22.5 zgc:112220	Protein mago nashi homolog
						Q567K2
						Q567K3	zgc:111983	Zgc:111983
						Q567N5
						Q567V5	snrpd2 si:dkey-113g17.2 DKEY-113G17.2-001	Small nuclear ribonucleoprotein Sm D2 (Sm-D2) (snRNP core protein D2)
						Q567Y4	ndufb9	NADH dehydrogenase (Ubiquinone) 1 beta subcomplex, 9 (NADH:ubiquinone oxidoreductase subunit B9)
						Q568B3	sept10	Septin 10
						Q568F6	adss adss2 zgc:110327	Adenylosuccinate synthetase isozyme 2 (AMPSase 2) (AdSS 2) (EC 6.3.4.4) (Adenylosuccinate synthetase, acidic isozyme) (Adenylosuccinate synthetase, liver isozyme) (L-type adenylosuccinate synthetase) (IMP--aspartate ligase 2)
						Q568H8	polr2h zgc:110289	DNA-directed RNA polymerases I, II, and III subunit RPABC3
						Q568M0
						Q568R9	sncga zgc:110133	Gamma1b-synuclein (Synuclein, gamma a) (Zgc:110133) (Zgc:110133 protein)
						Q568V3	nccrp1 si:dkey-85K8.6 wu:fa93e02 wu:fb12f07 zgc:122987	F-box only protein 50 (NCC receptor protein 1) (NCCRP-1) (Non-specific cytotoxic cell receptor protein 1)
						Q568W0	selenow sepw1	Selenoprotein W (SelW)
						Q56A35	actr2b arp2b si:dkey-66m17.2 zgc:110550	Actin-related protein 2-B (Actin-like protein 2-B)
						Q58ED3	srpx sprx	Sushi-repeat-containing protein (Sushi-repeat-containing protein X-linked)
						Q58EG2	erlin1 si:ch211-223p8.2 zgc:110547	Erlin-1 (Endoplasmic reticulum lipid raft-associated protein 1)
						Q58EK7	sept9b	Sept9b protein (Sept9b_tv1) (Sept9b_tv2) (Septin 9b)
						Q58EM0	hhla2a.1 zgc:113255	HERV-H LTR-associating 2a, tandem duplicate 1 (Zgc:113255)
						Q58ER0	rbm39b rnpc2l	RNA-binding motif protein 39b
						Q5BJ17	tufm zgc:110766	Elongation factor Tu
						Q5BJA1	zgc:114188	Zgc:114188
						Q5BJA2	ndufa5 zgc:114172	NADH:ubiquinone oxidoreductase subunit A5 (Zgc:114172)
						Q5BJD1	rab6bb zgc:112018	RAB6B, member RAS oncogene family b (Zgc:112018)
						Q5BJJ2	rpl3	Ribosomal protein L3 (Rpl3 protein)
						Q5BJJ5	hdhd2 zgc:110332	Haloacid dehalogenase-like hydrolase domain-containing protein 2
						Q5BJJ6	mat2b zgc:110308	Methionine adenosyltransferase 2 subunit beta (Methionine adenosyltransferase II beta) (MAT II beta)
						Q5BKV7	crip1 zgc:103738	Cysteine-rich protein 1 (Zgc:103738 protein)
						Q5BKV9	rpl9	Ribosomal protein L9 (Rpl9 protein)
						Q5BLE6	zgc:113054	Zgc:113054
						Q5BLE8	retsat retsata zgc:113107	All-trans-retinol 13,14-reductase (EC 1.3.99.23) (All-trans-13,14-dihydroretinol saturase A) (RetSat A) (All-trans-retinol 7,8-reductase)
						Q5CZQ1	ywhae2	Tyrosine 3-monooxygenase/tryptophan 5-monooxygenase activation protein, epsilon polypeptide 2 (Ywhae2 protein)
						Q5D016	pfdn1 zgc:110742	Prefoldin subunit 1
						Q5D018	rbm8a rbm8 zgc:110525	RNA-binding protein 8A (RNA-binding motif protein 8A) (Ribonucleoprotein RBM8A)
						Q5I0F6	prkar1aa prkar1a	Prkar1a protein (Protein kinase, cAMP-dependent, regulatory, type I, alpha (Tissue specific extinguisher 1)) (Protein kinase, cAMP-dependent, regulatory, type I, alpha (tissue-specific extinguisher 1) a)
						Q5PNP4	nt5e	5'-nucleotidase, ecto (CD73)
						Q5PQZ2	smad1	Mothers against decapentaplegic homolog (MAD homolog) (Mothers against DPP homolog) (SMAD family member)
						Q5PQZ4	tfap2c	Transcription factor AP-2 gamma (activating enhancer-binding protein 2 gamma)
						Q5PR58	armc1	Armadillo repeat-containing protein 1
						Q5PR98	ndrg2 zgc:101847	Protein NDRG2
						Q5RG12	hsp90aa1.2 hsp90a.2	Heat shock protein 90, alpha (cytosolic), class A member 1, tandem duplicate 2 (Heat shock protein 90-alpha 2)
						Q5RG84	fam129aa si:dkeyp-11g8.6	Family with sequence similarity 129 member Aa
						Q5RGD7	exoc2 sec5l1 CH211-266I18.1-001	Exocyst complex component 2
						Q5RGE6	hspa14 si:dkey-153k10.2	Heat shock 70 kDa protein 14
						Q5RGI5	ppp6r2a ppp6r2 saps2 si:dkey-159a18.3	Protein phosphatase 6, regulatory subunit 2a (Si:dkey-159a18.3)
						Q5RGK8	snd1	Staphylococcal nuclease domain-containing protein (EC 3.1.31.1)
						Q5RGP5	dusp23a si:dkeyp-95d10.1	Dual-specificity phosphatase 23a (Si:dkeyp-95d10.1)
						Q5RGR6	waslb	Wiskott-Aldrich syndrome-like b
						Q5RH26	atp5f1c atp5c1	ATP synthase subunit gamma
						Q5RH67	si:dkey-180p18.9	Si:dkey-180p18.9 (Fragment)
						Q5RHE5	si:dkey-90m5.4	Si:dkey-90m5.4
						Q5RHQ7	hnrnpub hnrnpu	Heterogeneous nuclear ribonucleoprotein Ub
						Q5RHR0	parp1	Poly [ADP-ribose] polymerase (PARP) (EC 2.4.2.-)
						Q5RHV1	tnpo3	Transportin 3
						Q5RHZ6	osgep	Probable tRNA N6-adenosine threonylcarbamoyltransferase (EC 2.3.1.234) (O-sialoglycoprotein endopeptidase) (t(6)A37 threonylcarbamoyladenosine biosynthesis protein osgep) (tRNA threonylcarbamoyladenosine biosynthesis protein osgep)
						Q5RI45	dcn	Decorin (Bone proteoglycan II)
						Q5RJ50	vta1	Vesicle (multivesicular body)-trafficking 1
						Q5RKM3	stip1	Stress-induced phosphoprotein 1 (Stress-induced-phosphoprotein 1 (Hsp70/Hsp90-organizing protein))
						Q5RKP8	smx5 si:ch73-14h10.2	U6 snRNA-associated Sm-like protein LSm2
						Q5RKP9	gna11b zgc:101761	Guanine nucleotide-binding protein (G protein), alpha 11b (Gq class) (Zgc:101761) (Zgc:101761 protein)
						Q5RKQ0	bcas2 zgc:101730	Pre-mRNA-splicing factor SPF27 (Protein BCAS2 homolog)
						Q5RZ65	agr2 si:ch211-201m19.5 wu:fj29g05 zgc:112187	Anterior gradient protein 2 homolog (Zagr2)
						Q5SNQ3	nrbp1 si:dkey-12h9.7	Nuclear receptor-binding protein 1
						Q5SP67	wdr26 si:ch211-153j24.6	WD repeat-containing protein 26
						Q5SPA3	acat2	Acetyl-CoA acetyltransferase 2
						Q5SPD1	eef1db si:dkey-235d18.4	Elongation factor-1, delta, b (Eukaryotic translation elongation factor 1 delta b (guanine nucleotide exchange protein))
						Q5SPJ1	serpina1l	Serine (or cysteine) proteinase inhibitor, clade A (alpha-1 antiproteinase, antitrypsin), member 1,-like
						Q5SPJ4
						Q5TYS5	scrn2 si:ch211-184m19.2	Secernin-2
						Q5TYY2	exoc4	Exocyst complex component 4
						Q5TYZ5	cand1	Cullin-associated and neddylation-dissociated 1
						Q5TZ05	msra si:dkey-221h15.1	Methionine sulfoxide reductase A
						Q5TZ42	cdc42bpb	CDC42-binding protein kinase beta (DMPK-like)
						Q5TZ72	pfas si:dkey-183n20.16	Phosphoribosylformylglycinamidine synthase
						Q5TZC7	asap2b	ArfGAP with SH3 domain, ankyrin repeat and PH domain 2b
						Q5TZD2	prdx6 CH211-246K22.1-001	Novel protein (Zgc:73360) (Peroxiredoxin 6) (Prdx6 protein)
						Q5TZG5	ezrb ezr	Ezrin (Ezrin b)
						Q5U369
						Q5U373	cab39l	Calcium-binding protein 39-like
						Q5U386	ppm1bb ppm1a	Protein phosphatase 1A, magnesium dependent, alpha isoform (Protein phosphatase, Mg2+/Mn2+-dependent, 1Bb)
						Q5U3E1
						Q5U3E2	cetp	Cholesteryl ester transfer protein
						Q5U3E4	sugt1 sgut1 zgc:103668	SGT1 homolog, MIS12 kinetochore complex assembly cochaperone (Zgc:103668) (Zgc:103668 protein)
						Q5U3G0	pgrmc1	Progesterone receptor membrane component 1
						Q5U3P2	pvalb8	Parvalbumin 8 (Pvalb8 protein)
						Q5U3T4	cpsf3	Cleavage and polyadenylation-specific factor 3 (Cpsf3 protein)
						Q5U3U3	cpt2 si:ch211-216k22.1 zgc:101627	Carnitine O-palmitoyltransferase 2, mitochondrial (EC 2.3.1.21) (Carnitine palmitoyltransferase II) (CPT II)
						Q5XIZ6	gpd1l	Glycerol-3-phosphate dehydrogenase 1-like protein (EC 1.1.1.8)
						Q5XJ32	sssca1 zgc:103754	Sjogren syndrome/scleroderma autoantigen 1 (Zgc:103754)
						Q5XJ36	park7 dj1 zgc:103725	Protein/nucleic acid deglycase DJ-1 (EC 3.1.2.-) (EC 3.5.1.-) (EC 3.5.1.124) (Maillard deglycase) (Parkinson disease protein 7 homolog) (Parkinsonism-associated deglycase) (Protein DJ-1zDJ-1) (zDJ-1)
						Q5XJ95	pawr pawrl	PRKC, apoptosis, WT1, regulator (PRKC, apoptosis, WT1, regulator like) (Pawrl protein)
						Q5XJN2	ifi30 GILT	Gamma-interferon-inducible lysosomal thiol reductase (EC 1.8.-.-) (Gamma-interferon-inducible protein IP-30)
						Q5XJS8	hsd17b10 hadh2	Hsd17b10 protein (Hydroxysteroid (17-beta) dehydrogenase 10)
						Q642H5	ppp2r1bb ppp2r1b	Protein phosphatase 2 (Formerly 2A), regulatory subunit A, beta isoform (Protein phosphatase 2, regulatory subunit A, beta b)
						Q642H9	rps4x rps4 zgc:92076	40S ribosomal protein S4, X isoform
						Q642J0	hint1 zgc:103764	Histidine triad nucleotide-binding protein 1 (Zgc:103764) (Zgc:103764 protein)
						Q64HD0	shbg	Sex hormone-binding globulin
						Q66HU5	hat1	Histone acetyltransferase type B catalytic subunit (EC 2.3.1.48)
						Q66HV4	copb1 hap happy	Coatomer subunit beta (Beta-coat protein) (Beta-COP)
						Q66HW0	coasy zgc:92337	CoA synthase (Zgc:92337)
						Q66HW2	ehd1b ehd1 ehd3l	EH-domain containing 1 (EH-domain-containing 1b)
						Q66HY6	ncoa5 zgc:92194	Nuclear receptor coactivator 5 (Zgc:92194)
						Q66I14	sephs2 sps2	Selenophosphate synthetase 2
						Q66I20	serpinf1 zgc:92072	Serpin peptidase inhibitor, clade F (alpha-2 antiplasmin, pigment epithelium-derived factor), member 1 (Zgc:92072)
						Q66I24	ass1 zgc:92051	Argininosuccinate synthase (EC 6.3.4.5) (Citrulline--aspartate ligase)
						Q66I37	nucks1a nucks1	Nuclear casein kinase and cyclin-dependent kinase substrate 1 (Nuclear casein kinase and cyclin-dependent kinase substrate 1a)
						Q66I42	msna rdx	Moesin a (Radixin)
						Q66I64	aqp8a.1 aqp8 aqp8a	Aqp8a protein (Aquaporin 8) (Aquaporin 8a) (Aquaporin 8a, tandem duplicate 1)
						Q66I80	fabp11a fabp11	Fatty acid-binding protein 11a (Fatty acid-binding protein H6-isoform)
						Q66IB6	hmgb2b hmgb2 hmgb2l	High mobility group box 2b (High-mobility group box 2) (Hmgb2 protein)
						Q66JN5	pon1 zgc:91887	Paraoxonase 1 (Zgc:91887) (Zgc:91887 protein)
						Q66L49	slc25a24 scamc1 si:ch211-63o20.9 zgc:92470	Calcium-binding mitochondrial carrier protein SCaMC-1 (Small calcium-binding mitochondrial carrier protein 1) (Solute carrier family 25 member 24)
						Q68EH2	ak1 AK1 zgc:91930	Adenylate kinase isoenzyme 1 (AK 1) (EC 2.7.4.3) (EC 2.7.4.6) (ATP-AMP transphosphorylase 1) (ATP:AMP phosphotransferase) (Adenylate monophosphate kinase) (Myokinase)
						Q68EK8	tnpo2	Transportin 2 (Importin 3, Karyopherin beta 2b)
						Q6AXJ2	eif3ha eif3h eif3s3a	Eukaryotic translation initiation factor 3 subunit H-A (eIF3h-A) (Eukaryotic translation initiation factor 3 subunit 3-A) (eIF-3-gamma-A) (eIF3 p40 subunit A)
						Q6AXL2	rida hrsp12 zgc:92739	Reactive intermediate imine deaminase A homolog (Zgc:92739)
						Q6AZA0	acat1	Acetyl-CoA acetyltransferase, mitochondrial (EC 2.3.1.9) (Acetoacetyl-CoA thiolase)
						Q6AZA2	ndufv1	NADH dehydrogenase [ubiquinone] flavoprotein 1, mitochondrial (EC 1.6.99.3) (EC 7.1.1.2)
						Q6AZB3	ciapin1 si:ch211-51l3.3-001	Anamorsin (Cytokine-induced apoptosis inhibitor 1) (Fe-S cluster assembly protein DRE2 homolog)
						Q6AZC1	psmc5 wu:fa14g03 wu:fb23a11 zgc:92464	Proteasome (Prosome, macropain) 26S subunit, ATPase, 5 (Proteasome 26S subunit, ATPase 5) (Psmc5 protein)
						Q6DBR3	adprh zgc:91926	ADP-ribosylarginine hydrolase (Zgc:91926) (Zgc:91926 protein)
						Q6DBS8	cfd cfdl zgc:109940	Complement factor D (adipsin) (Zgc:109940) (Zgc:109940 protein)
						Q6DBT3	txndc17 txnl5 zgc:91920	Thioredoxin domain-containing protein 17 (Thioredoxin-like protein 5)
						Q6DBU4	zgc:92380	Zgc:92380
						Q6DBY2	naa50 mak3 nat13	N-alpha-acetyltransferase 50 (EC 2.3.1.258) (N-acetyltransferase NAT13) (N-epsilon-acetyltransferase 50) (EC 2.3.1.-) (NatE catalytic subunit)
						Q6DC04	carm1 si:dkey-204f11.63 zgc:100805	Histone-arginine methyltransferase CARM1 (EC 2.1.1.319) (Coactivator-associated arginine methyltransferase 1) (Protein arginine N-methyltransferase 4)
						Q6DC18	phpt1	Phosphohistidine phosphatase 1
						Q6DC41	zgc:100864	Zgc:100864
						Q6DC81	nutf2l nutf2	Nuclear transport factor 2 (Nuclear transport factor 2,-like)
						Q6DC92	ralba zgc:100801	V-ral simian leukemia viral oncogene homolog Ba (ras-related) (Zgc:100801)
						Q6DEG5	polr2eb polr2e	Polymerase (RNA) II (DNA directed) polypeptide E (Polymerase (RNA) II (DNA directed) polypeptide E, b)
						Q6DEH3	camk2d1 camk2db zgc:101001 zgc:173815	Calcium/calmodulin-dependent protein kinase type II delta 1 chain (EC 2.7.11.17) (Calcium/calmodulin-dependent protein kinase type II delta-B chain) (CaM kinase II subunit delta-B) (CaM-kinase II delta-B chain) (CaMK-II subunit delta-B)
						Q6DEH9	hsd17b14 zgc:100900	Hydroxysteroid (17-beta) dehydrogenase 14 (Zgc:100900)
						Q6DEI0	pltp zgc:100903	Phospholipid transfer protein (Zgc:100903)
						Q6DEM2	crk	V-crk avian sarcoma virus CT10 oncogene homolog (V-crk sarcoma virus CT10 oncogene homolog (Avian))
						Q6DEM5	timm8a tim8a zgc:100916	Mitochondrial import inner membrane translocase subunit Tim8 A
						Q6DEM9	neu3.2	Sialidase 3 (membrane sialidase), tandem duplicate 2 (Sialidase 3.2)
						Q6DFZ8	capn2l zgc:92480	Zgc:92480
						Q6DG10	mmp2	Matrix metallopeptidase 2 (Matrix metalloproteinase 2)
						Q6DG22	ada	Adenosine deaminase (EC 3.5.4.4) (Adenosine aminohydrolase)
						Q6DG30	serpinb1	Serpin peptidase inhibitor, clade B (Ovalbumin), member 1 (Serpinb1 protein)
						Q6DG41	zgc:92360	Zgc:92360 (Zgc:92360 protein)
						Q6DG42
						Q6DG91	psmg1 wu:fl12g04 wu:fu18c08 zgc:91806	Proteasome assembly chaperone 1
						Q6DGE4	tyrp1b tyrp1	Tyrosinase-related protein 1b
						Q6DGH3	sec61b zgc:92922	Protein transport protein Sec61 subunit beta
						Q6DGI6	txn zgc:92903	Thioredoxin
						Q6DGJ3	timm13 tim13a timm13a zgc:92895	Mitochondrial import inner membrane translocase subunit Tim13
						Q6DGJ6	prdx2 prdx1	Peroxiredoxin 2
						Q6DGJ8	surf4l	Surf4l protein (Surfeit gene 4,-like)
						Q6DGK1	arl1 zgc:92883	ADP-ribosylation factor-like 1 (Zgc:92883) (Zgc:92883 protein)
						Q6DGL1	mydgf zgc:92871	Myeloid-derived growth factor (Zgc:92871)
						Q6DGL5	trappc5	Trafficking protein particle complex subunit 5
						Q6DGL9	rpl38	Ribosomal protein L38 (Rpl38 protein)
						Q6DGQ9	arl6ip5b zgc:92811 zp22	PRA1 family protein
						Q6DGT9	pomp zgc:92775	Proteasome maturation protein (Zgc:92775)
						Q6DGU9	gstk1 zgc:92763	Glutathione S-transferase kappa (EC 2.5.1.18)
						Q6DGV5	rab10 zgc:92757	RAB10, member RAS oncogene family (Zgc:92757)
						Q6DGX4	gcshb zgc:92732	Glycine cleavage system H protein
						Q6DGX8	psma1 zgc:92726	Proteasome subunit alpha type (EC 3.4.25.1)
						Q6DGY8	psma6b zgc:92716	Proteasome subunit alpha type (EC 3.4.25.1)
						Q6DGZ5	gng7	Guanine nucleotide-binding protein subunit gamma
						Q6DH16	otub1a otub1l	Ubiquitin thioesterase (EC 3.4.19.12)
						Q6DH28	mob4 mobkl3	MOB family member 4, phocein (MOB1, Mps One Binder kinase activator-like 3 (Yeast))
						Q6DH33	commd2	COMM domain-containing 2
						Q6DH63	cox6b1 zgc:92631	Cytochrome c oxidase subunit
						Q6DH65	denr zgc:92629	Density-regulated protein (DRP)
						Q6DH80	lygl1 zgc:92608	Lysozyme g (EC 3.2.1.17)
						Q6DHB6	krt91 krt17 zgc:92533	Keratin 91 (Zgc:92533)
						Q6DHC1	rab18b rab18 zgc:92523	Ras-related protein Rab-18-B
						Q6DHI9	psmb2	Proteasome subunit beta (EC 3.4.25.1)
						Q6DHK1	naxe aibp apoa1bp si:dkeyp-84f11.6 zgc:92263	NAD(P)H-hydrate epimerase (EC 5.1.99.6) (Apolipoprotein A-I-binding protein) (AI-BP) (NAD(P)HX epimerase)
						Q6DHL6	rps6 zgc:92237	40S ribosomal protein S6
						Q6DHP7	gbp1 zgc:92185	Guanylate-binding protein 1 (Zgc:92185)
						Q6DHS3	rpl15	Ribosomal protein L15
						Q6DHT4	aldh6a1 zgc:92082	Aldehyde dehydrogenase 6 family, member A1 (Zgc:92082)
						Q6DHU3	krt97 zgc:92061	Keratin 97 (Zgc:92061)
						Q6DI20	dpp3	Dipeptidyl peptidase 3 (EC 3.4.14.4) (Dipeptidyl aminopeptidase III) (Dipeptidyl peptidase III)
						Q6DI22	hadh hadhsc	Hydroxyacyl-CoA dehydrogenase (Hydroxyacyl-Coenzyme A dehydrogenase)
						Q6DI32	snx5	Sorting nexin
						Q6DKF4	twf1b	Twf1b protein (Twinfilin actin-binding protein 1b) (Twinfilin, actin-binding protein, homolog 1b)
						Q6DRC0	sars	Serine--tRNA ligase, cytoplasmic (EC 6.1.1.11) (Seryl-tRNA synthetase) (SerRS)
						Q6DRC4	eif3g eif3s4	Eukaryotic translation initiation factor 3 subunit G (eIF3g) (Eukaryotic translation initiation factor 3 RNA-binding subunit) (eIF-3 RNA-binding subunit) (Eukaryotic translation initiation factor 3 subunit 4)
						Q6DRD1	atp5po atp5o	ATP synthase oligomycin sensitivity conferral protein (ATP synthase peripheral stalk subunit OSCP) (ATP synthase, H+ transporting, mitochondrial F1 complex, O subunit) (Atp5o protein)
						Q6DRD2	psmc6 DKEY-29M11.4-001	26S protease regulatory subunit S10B (Proteasome (Prosome, macropain) 26S subunit, ATPase, 6) (Proteasome 26S subunit, ATPase 6) (Psmc6 protein)
						Q6DRD5	ufd1l DKEY-49H9.2-001	Ubiquitin fusion degradation 1-like (Ubiquitin fusion degradation 1-like protein) (Ubiquitin recognition factor in ER-associated degradation 1)
						Q6DRE6	rpl12	60S ribosomal protein L12 (Ribosomal protein L12)
						Q6DRF3	psmb1	Proteasome subunit beta (EC 3.4.25.1)
						Q6DRH5	nop10 nola3	H/ACA ribonucleoprotein complex subunit 3 (Nucleolar protein 10) (Nucleolar protein family A member 3) (snoRNP protein NOP10)
						Q6DRI1	eif3ea eif3s6a int6	Eukaryotic translation initiation factor 3 subunit E-A (eIF3e-A) (Eukaryotic translation initiation factor 3 subunit 6-A)
						Q6DRM4	parvaa parva	Actopaxin (Parva protein) (Parvin, alpha) (Parvin, alpha a)
						Q6DRN8	cdipt	CDP-diacylglycerol--inositol 3-phosphatidyltransferase (EC 2.7.8.11)
						Q6GMG0	mhc1uba CH211-51F10.2-001	Major histocompatibility complex class I UBA (Major histocompatibility complex class I UBA protein) (Mhc1uba protein)
						Q6GMH1	dbnla zgc:91835	Drebrin-like a (Zgc:91835)
						Q6GMI0	htra1a htra1 prss11 zgc:92029	Serine protease HTRA1A (EC 3.4.21.-) (High-temperature requirement A serine peptidase 1A) (Serine protease 11)
						Q6GMI5	bgna bgn	Biglycan
						Q6GMJ1	ces2 zgc:153863	Carboxylic ester hydrolase (EC 3.1.1.-) (Fragment)
						Q6GQL6	dctn3	Dynactin 3 (P22)
						Q6GQL7	fhl1a fhla	Fhla protein (Four and a half LIM domains 1a) (Four and a half LIM domains a)
						Q6GQM3	psma6l psma6b	Proteasome subunit alpha type (EC 3.4.25.1)
						Q6GQN6	acaa1	Acaa1 protein (Acetyl-CoA acyltransferase 1) (Acetyl-Coenzyme A acyltransferase 1)
						Q6GQN9	dhrs1	Dehydrogenase/reductase (SDR family) member 1 (Dhrs1 protein)
						Q6IMW6	rps13	Ribosomal protein S13 (Rps13 protein)
						Q6IMW8	rpl39 zgc:92371	Ribosomal protein L39 (Zgc:92371)
						Q6IQ59	uqcrc2b uqcrc2	Ubiquinol-cytochrome c reductase core protein 2b (Ubiquinol-cytochrome c reductase core protein II)
						Q6IQ72	psmc1b	Proteasome (Prosome, macropain) 26S subunit, ATPase, 1b (Proteasome 26S subunit, ATPase 1b)
						Q6IQ73	chmp4c chmp4b zgc:55566	Charged multivesicular body protein 4c (Chromatin-modifying protein 4c) (CHMP4c)
						Q6IQC6	psmd4a psmd4 zgc:86833	Proteasome 26S subunit, non-ATPase 4a (Zgc:86833)
						Q6IQE2	eef1b2	Eukaryotic translation elongation factor 1 beta 2
						Q6IQE5	asna1 si:dkey-121b10.2 zgc:86799	ATPase asna1 (EC 3.6.-.-) (Arsenical pump-driving ATPase) (Arsenite-stimulated ATPase)
						Q6IQH4	psmd8 zgc:86762	Proteasome 26S subunit, non-ATPase 8 (Zgc:86762)
						Q6IQI6	rpl11	60S ribosomal protein L11 (Ribosomal protein L11)
						Q6IQJ1	tomm22	Tomm22 protein (translocase of Outer mitochondrial membrane 22 homolog (Yeast))
						Q6IQL3	ppil3 zgc:86715	Peptidyl-prolyl cis-trans isomerase (PPIase) (EC 5.2.1.8)
						Q6IQM2	cyc zgc:86706	Cytochrome c
						Q6IQN5	rac2	Rac family small GTPase 2 (Ras-related C3 botulinum toxin substrate 2 (Rho family, small GTP binding protein Rac2))
						Q6IQP1	gyg1b gygl	Glycogenin 1b (Glycogenin, like)
						Q6IQQ0	rpl21	Ribosomal protein L21
						Q6IQT4	cops2 csn2 zgc:86624	COP9 signalosome complex subunit 2 (Signalosome subunit 2)
						Q6IQT8	ruvbl1	RuvB-like helicase (EC 3.6.4.12)
						Q6J0N1	rnf114 znf313	Ring finger protein 114 (ZFP313 protein)
						Q6JAA4	ctcf	CCCTC-binding factor (CCCTC-binding factor (Zinc finger protein))
						Q6JIZ2	puraa pura	Pur-alpha (Pura protein) (Purine-rich element binding protein A) (Purine-rich element-binding protein Aa)
						Q6NSN2	mao zgc:85761	Amine oxidase [flavin-containing] (EC 1.4.3.4) (Monoamine oxidase) (MAO) (Z-MAO)
						Q6NSN6	ppp1caa ppp1ca zgc:85729	Serine/threonine-protein phosphatase (EC 3.1.3.16)
						Q6NUV0	rab3gap1 rab3gap wu:fj56a04	Rab3 GTPase-activating protein catalytic subunit
						Q6NUW5	anp32e zgc:65995 zgc:85827	Acidic leucine-rich nuclear phosphoprotein 32 family member E
						Q6NUX8	rhoaa	Rho-related GTP-binding protein RhoA-A
						Q6NUY0	ak4 AK3L1 ak3l1 AK4 zgc:85790	Adenylate kinase 4, mitochondrial (AK 4) (EC 2.7.4.10) (EC 2.7.4.6) (Adenylate kinase 3-like) (GTP:AMP phosphotransferase AK4)
						Q6NUZ3	syncrip	Synaptotagmin-binding, cytoplasmic RNA-interacting protein
						Q6NV11	hmga1a hmga1 hmgiy zgc:85677	High mobility group AT-hook 1a (Zgc:85677) (Zgc:85677 protein)
						Q6NV33	idh3a	Isocitrate dehydrogenase [NAD] subunit, mitochondrial
						Q6NVA6	myl9b myl9 myl9l	Myosin, light chain 9b, regulatory (Myosin, light polypeptide 9, regulatory)
						Q6NVI6	cct5 CCT5	T-complex protein 1 subunit epsilon (TCP-1-epsilon) (CCT-epsilon)
						Q6NW47	ckap4 zgc:85975	Cytoskeleton-associated protein 4 (Zgc:85975)
						Q6NW90	tubb5 Tubb5	Tubulin beta chain
						Q6NWC1	vdac1 VDAC1	Vdac1 protein (Voltage-dependent anion channel 1)
						Q6NWC3	rps2	Ribosomal protein S2
						Q6NWC6	cpsf6	Cleavage and polyadenylation specificity factor subunit 6
						Q6NWF6	krt8 krt2-8	Keratin, type II cytoskeletal 8 (Cytokeratin-8) (CK-8) (Keratin-8) (K8)
						Q6NWH2	marcksl1b marcksl1a marcksl2 zgc:85717	MARCKS-related protein 1-B (MARCKS-like protein 1-A) (MARCKS-like protein 1-B)
						Q6NWI7	tmed10	Tmed10 protein (Transmembrane emp24-like trafficking protein 10 (Yeast)) (Transmembrane p24-trafficking protein 10)
						Q6NWJ5	tuba8l4	Tubulin alpha chain
						Q6NWK1	capza1a capza1	F-actin-capping protein subunit alpha
						Q6NWK3	ranbp1	RAN-binding protein 1 (Ranbp1 protein)
						Q6NWL4	cnot9 rcd1 rqcd1 si:dkeyp-84a8.6 zgc:85618	CCR4-NOT transcription complex subunit 9 (Cell differentiation protein RQCD1 homolog) (Rcd-1)
						Q6NWY2	oxsr1b	Oxidative stress-responsive kinase 1b (Oxidative-stress responsive 1b) (Oxsr1b protein)
						Q6NX08	wdr12	Ribosome biogenesis protein wdr12 (WD repeat-containing protein 12)
						Q6NX86	hmgb1a HMGB1 hmgb1	High mobility group box 1a (High-mobility group box 1)
						Q6NX98	st13	ST13, Hsp70-interacting protein (Suppression of tumorigenicity 13 (Colon carcinoma) (Hsp70 interacting protein))
						Q6NXA6
						Q6NXC1	rbm4.3 zgc:56141	RNA-binding motif protein 4.3 (Zgc:56141)
						Q6NY24	plscr3b zgc:77051	Phospholipid scramblase
						Q6NY31	prkab1b prkab1	Protein kinase, AMP-activated, beta 1 non-catalytic subunit, b
						Q6NY64	ppp2r2d zgc:76887	Serine/threonine-protein phosphatase 2A 55 kDa regulatory subunit B delta isoform (PP2A subunit B isoform B55-delta) (PP2A subunit B isoform PR55-delta) (PP2A subunit B isoform R2-delta) (PP2A subunit B isoform delta)
						Q6NY65	rcc1	Regulator of chromosome condensation 1
						Q6NY81	ehd1a zgc:77049	EH-domain-containing 1a (Zgc:77049)
						Q6NY93	fuca1.1 fuca1	Alpha-L-fucosidase (EC 3.2.1.51)
						Q6NYD7	ociad1 si:ch211-14g4.3 zgc:56639	OCIA domain-containing protein 1
						Q6NYE1	fgb	Fibrinogen beta chain (Fibrinogen, B beta polypeptide)
						Q6NYE2	rcc2 zgc:77115	Protein RCC2 homolog
						Q6NYE3	pgm2	Phosphoglucomutase 2
						Q6NYJ1	lasp1	LIM and SH3 protein 1
						Q6NYJ8	mob1a mobk1b mobkl1b	MOB kinase activator 1A (Mobkl1b protein)
						Q6NYJ9
						Q6NYN3	ipo7	Importin 7
						Q6NYQ4	rab32a rab32	RAB32a, member RAS oncogene family (Rab32 protein)
						Q6NYQ7	nnt	Nicotinamide nucleotide transhydrogenase
						Q6NYR0	shmt1	Serine hydroxymethyltransferase (EC 2.1.2.1)
						Q6NYR4
						Q6NYS4	pebp1 pbp	Phosphatidylethanolamine binding protein (Phosphatidylethanolamine-binding protein 1)
						Q6NYV1	psmd3	Proteasome (Prosome, macropain) 26S subunit, non-ATPase, 3 (Proteasome 26S subunit, non-ATPase 3)
						Q6NYV3	h1f0 zgc:65861	H1 histone family, member 0 (Zgc:65861)
						Q6NYX2	tardbpl	TAR DNA-binding protein,-like (Tardbpl protein)
						Q6NYX8	pithd1 zgc:77241	PITH domain-containing protein 1
						Q6NZ06	ilf2	Interleukin enhancer-binding factor 2 homolog
						Q6NZS4	rtcb zgc:76871	tRNA-splicing ligase RtcB homolog (EC 6.5.1.3)
						Q6NZU0	hspa4b hspa4	Heat shock protein 4 (Heat shock protein 4b)
						Q6NZV4	csrp1a csrp1	Cysteine and glycine-rich protein 1 (Cysteine and glycine-rich protein 1a)
						Q6NZZ2	arpc4l arpc4	Actin-related protein 2/3 complex subunit 4
						Q6P023
						Q6P026	banf1 baf zgc:77767	Barrier-to-autointegration factor
						Q6P0D9	ciao1 wdr39 si:dkey-49H9.1 zgc:55911 zgc:77394	Probable cytosolic iron-sulfur protein assembly protein ciao1 (WD repeat-containing protein 39)
						Q6P0G5	tfg	Tfg protein (Trk-fused gene)
						Q6P0H2	nqo1	NAD(P)H dehydrogenase, quinone 1
						Q6P0H6	cops4 csn4 zgc:77137	COP9 signalosome complex subunit 4 (Signalosome subunit 4)
						Q6P0I2	psma8 zgc:77139	Proteasome subunit alpha type (EC 3.4.25.1)
						Q6P0S5	adh8a	Alcohol dehydrogenase 8a
						Q6P0T0	ndufs8a ndufs8	NADH dehydrogenase (Ubiquinone) Fe-S protein 8, (NADH-coenzyme Q reductase) (NADH:ubiquinone oxidoreductase core subunit S8a)
						Q6P0U0	amdhd2 zgc:77775	N-acetylglucosamine-6-phosphate deacetylase (GlcNAc 6-P deacetylase) (EC 3.5.1.25) (Amidohydrolase domain-containing protein 2)
						Q6P0V6	rpl8 zgc:73105	60S ribosomal protein L8
						Q6P0V8	anxa5b	Annexin
						Q6P102	ywhabl	Tyrosine 3-monooxygenase/tryptophan 5-monooxygenase activation protein, beta polypeptide-like
						Q6P124	g3bp1	GTPase-activating protein (SH3 domain)-binding protein 1
						Q6P131	txn2 zgc:77127	Thioredoxin 2 (Zgc:77127)
						Q6P298	nubp1 zgc:92138	Cytosolic Fe-S cluster assembly factor nubp1 (Nucleotide-binding protein 1) (NBP 1)
						Q6P2A9	fubp1	Far upstream element (FUSE)-binding protein 1
						Q6P2B0	vapb	VAMP (vesicle-associated membrane protein)-associated protein B and C (Vapb protein) (Vesicle-associated membrane protein, associated protein B and C)
						Q6P2T3	gdpd3a gdpd3	Glycerophosphodiester phosphodiesterase domain containing 3 (Glycerophosphodiester phosphodiesterase domain-containing 3a)
						Q6P2T5	arpc2	Arp2/3 complex 34 kDa subunit
						Q6P2U5	arf6b arf6a zgc:77665	ADP-ribosylation factor 6a (ADP-ribosylation factor 6b) (Zgc:77665) (Zgc:77665 protein)
						Q6P2U9	cops3 csn3 wu:fc32a02	COP9 signalosome complex subunit 3 (Signalosome subunit 3)
						Q6P2V4	hgd	Hgd protein (Homogentisate 1,2-dioxygenase)
						Q6P3G1	cp	Ceruloplasmin
						Q6P3G9	erp44 txndc4	Endoplasmic reticulum protein 44 (Thioredoxin domain containing 4 (Endoplasmic reticulum))
						Q6P3I0	heatr3	HEAT repeat-containing 3
						Q6P3J2
						Q6P3J5	eef2b EEF2 eef2l	Eukaryotic translation elongation factor 2 (Eukaryotic translation elongation factor 2, like) (Eukaryotic translation elongation factor 2b)
						Q6P3J7	ehd2b ehd2	EH-domain containing 2 (EH-domain-containing 2b)
						Q6P3L0	mvp	Major vault protein (MVP)
						Q6P3L3	hspa5	Heat shock protein 5 (Immunoglobulin binding protein)
						Q6P3L6	hsd17b12a zgc:55589	Very-long-chain 3-oxoacyl-CoA reductase-A (EC 1.1.1.330) (17-beta-hydroxysteroid dehydrogenase 12-A) (17-beta-HSD 12-A) (zf3.1) (zfHSD17B12A) (3-ketoacyl-CoA reductase) (KAR) (Estradiol 17-beta-dehydrogenase 12-A) (EC 1.1.1.62)
						Q6P3L9	glud1b	Glutamate dehydrogenase 1 (Glutamate dehydrogenase 1b)
						Q6P4U8	dnase1l4.2 zgc:77816	Deoxyribonuclease
						Q6P5J7	clic3 clica pnpla7a	Chloride intracellular channel 3 (Chloride intracellular channel a) (Patatin-like phospholipase domain-containing 7a)
						Q6P5K3	rplp0	60S acidic ribosomal protein P0
						Q6P5K5	rplp1	Ribosomal protein, large, P1
						Q6P5L3	rpl19 zgc:77733	60S ribosomal protein L19
						Q6P5L8	hsdl2	Hydroxysteroid dehydrogenase-like protein 2 (EC 1.-.-.-)
						Q6P5M2	wdr61 zgc:77675	WD repeat-containing protein 61
						Q6P5M3	rps9	Ribosomal protein S9
						Q7ZUW4	arf5 DKEY-238C7.10-001	ADP-ribosylation factor 5 (Arf5 protein)
						Q6P5M9	tubb4b tubb2c	Tubulin beta chain
						Q6P603	anxa2a	Annexin
						Q6P696	glo1	Lactoylglutathione lyase (EC 4.4.1.5) (Glyoxalase I)
						Q6P6E0	atp5l	ATP synthase, H+-transporting, mitochondrial F0 complex, subunit g (Atp5l protein)
						Q6P6E5	ndufb7 zgc:77820	NADH:ubiquinone oxidoreductase subunit B7 (Zgc:77820)
						Q6P6F0	rps17 zgc:77702	Ribosomal protein S17 (Zgc:77702)
						Q6P943	stat1a	Signal transducer and activator of transcription
						Q6P963	hagh zgc:73161	Hydroxyacylglutathione hydrolase, mitochondrial (EC 3.1.2.6) (Glyoxalase II) (Glx II)
						Q6P964	ppp4r2a ppp4r2 wu:fe11b04	Serine/threonine-protein phosphatase 4 regulatory subunit 2-A
						Q6P971	pycr1a pycr1	Pyrroline-5-carboxylate reductase (EC 1.5.1.2)
						Q6P972	tuba2	Tubulin alpha chain
						Q6P980	sod2	Superoxide dismutase (EC 1.15.1.1)
						Q6PBA2	lsm12a lsm12	Protein LSM12 homolog A
						Q6PBH4	dynll1 dynll2	Dynein light chain
						Q6PBI0	sucla2 SUCLA2	Succinate--CoA ligase [ADP-forming] subunit beta, mitochondrial (EC 6.2.1.5) (ATP-specific succinyl-CoA synthetase subunit beta) (A-SCS) (Succinyl-CoA synthetase beta-A chain) (SCS-betaA)
						Q6PBI6	pcbd1 pcbd	6-pyruvoyl-tetrahydropterin synthase/dimerization cofactor of hepatocyte nuclear factor 1 alpha (TCF1) (Pterin-4 alpha-carbinolamine dehydratase/dimerization cofactor of hepatocyte nuclear factor 1 alpha)
						Q6PBJ6	ndufb6 zgc:73375	NADH:ubiquinone oxidoreductase subunit B (Zgc:73375)
						Q6PBJ8	fkbp1aa zgc:73373	Peptidylprolyl isomerase (EC 5.2.1.8)
						Q6PBJ9	rplp2	Ribosomal protein, large P2
						Q6PBK1	ccdc58 zgc:73369	Coiled-coil domain-containing protein 58
						Q6PBK3	rps28 zgc:73367	40S ribosomal protein S28
						Q6PBR5	atp6v1g1 DKEY-190C14.3-001	V-type proton ATPase subunit G
						Q6PBS8	chchd2 chchd2l	Chchd2l protein (Coiled-coil-helix-coiled-coil-helix domain containing 2-like) (Coiled-coil-helix-coiled-coil-helix domain-containing 2)
						Q6PBT1	rps27.2 zgc:73262	40S ribosomal protein S27
						Q6PBV6	nhp2 nola2 zgc:73227	H/ACA ribonucleoprotein complex subunit 2-like protein (Nucleolar protein family A member 2-like protein) (snoRNP protein NHP2)
						Q6PBW3	rps14	Ribosomal protein S14
						Q6PBW7	rps19	Ribosomal protein S19
						Q6PBW9	rpe	Ribulose-phosphate 3-epimerase (EC 5.1.3.1)
						Q6PBX2	sar1b sara2	SAR1a gene homolog 2 (S. cerevisiae) (Secretion-associated, Ras-related GTPase 1B)
						Q6PBX5	adi1 mtcbp1 zgc:73201	1,2-dihydroxy-3-keto-5-methylthiopentene dioxygenase (EC 1.13.11.54) (Acireductone dioxygenase (Fe(2+)-requiring)) (ARD) (Fe-ARD) (Membrane-type 1 matrix metalloproteinase cytoplasmic tail-binding protein 1) (MTCBP-1)
						Q6PBX8	ndufv2 zgc:73198	NADH:ubiquinone oxidoreductase core subunit V2 (Zgc:73198)
						Q6PBX9	reep5	Receptor expression-enhancing protein
						Q6PBY1	rps3a	40S ribosomal protein S3a
						Q6PBY3	edf1 zgc:73192 zgc:86829	Endothelial differentiation-related factor 1 homolog (EDF-1)
						Q6PBY8	skp1 skp1a	S-phase kinase-associated protein 1 (S-phase kinase-associated protein 1A)
						Q6PBZ1	rpl7a DKEY-226M8.3-001	Ribosomal protein L7a
						Q6PC12	eno1a eno1	Enolase 1, (Alpha) (Enolase 1a, (alpha))
						Q6PC13	phb2a phb2	Prohibitin 2 (Prohibitin 2a)
						Q6PC14	rpl23 zgc:73149	60S ribosomal protein L23
						Q6PC22	ndufa8	NADH dehydrogenase [ubiquinone] 1 alpha subcomplex subunit 8
						Q6PC29	ywhag1 ywhag zgc:73131	14-3-3 protein gamma-1
						Q6PC30	cops5 zgc:73130	COP9 signalosome complex subunit 5 (Signalosome subunit 5) (EC 3.4.-.-)
						Q6PC53	ppiab ppial	Peptidyl-prolyl cis-trans isomerase (PPIase) (EC 5.2.1.8)
						Q6PC68
						Q6PC69	rpl10a zgc:73082	60S ribosomal protein L10a
						Q6PC73	grb2b grb2	Growth factor receptor-bound protein 2 (Growth factor receptor-bound protein 2b)
						Q6PC77	atp5pd atp5h	ATP synthase subunit d, mitochondrial
						Q6PC80	rps5	Ribosomal protein S5
						Q6PC90	rps12	40S ribosomal protein S12
						Q6PC91	btf3l4	Transcription factor BTF3 homolog 4 (Basic transcription factor 3-like 4)
						Q6PC95	tuba8l2	Tubulin alpha chain
						Q6PCR4	ranbp3b zgc:66385	RAN-binding protein 3b (Zgc:66385)
						Q6PCR7	eif3a eif3s10	Eukaryotic translation initiation factor 3 subunit A (eIF3a) (Eukaryotic translation initiation factor 3 subunit 10) (eIF-3-theta)
						Q6PCS6	mtfp1 mtp18 zgc:63910	Mitochondrial fission process protein 1 (Mitochondrial 18 kDa protein) (MTP18)
						Q6PCS7	prkag1	Protein kinase, AMP-activated, gamma 1 non-catalytic subunit
						Q6PD83	bzw1a bzw1 si:ch211-246m6.3 zgc:63787	Basic leucine zipper and W2 domain-containing protein 1-A
						Q6PD99	marcksl1a marcksl1 marcksl1b	MARCKS-related protein 1-A (MARCKS-like protein 1-A) (MARCKS-like protein 1-B)
						Q6PE26	calr3a calr	Calr protein (Calreticulin 3a)
						Q6PE34	zgc:65894	Tubulin beta chain
						Q6PE45	rer1 RER1	Protein RER1
						Q6PFJ0	rpl7l1	Ribosomal protein L7-like 1
						Q6PFS4	immt	MICOS complex subunit MIC60 (Mitofilin)
						Q6PFS7	atg3 apg3l zgc:64156	Ubiquitin-like-conjugating enzyme ATG3 (EC 2.3.2.-) (Autophagy-related protein 3) (APG3-like)
						Q6PFT1	fbp1a	Fructose-1,6-bisphosphatase 1a
						Q6PFT2
						Q6PFT7	cotl1 COTL1	Coactosin-like 1 (Coactosin-like 1 (Dictyostelium)) (Coactosin-like F-actin-binding protein 1) (Cotl1 protein)
						Q6PFU1	cd81a cd81	Tetraspanin
						Q6PFU4	cdc42	Cell division cycle 42
						Q6PFV1	arpp19a arpp19	cAMP-regulated phosphoprotein 19a
						Q6PGV1	atp6v0d1 cto zgc:63769	V-type proton ATPase subunit d 1 (V-ATPase subunit d 1) (Vacuolar proton pump subunit d 1)
						Q6PGY7	cisd1 si:dkey-18n13.4 zgc:63561	CDGSH iron sulfur domain 1 (Zgc:63561)
						Q6PGZ7	irf6	Interferon regulatory factor 6 (Irf6 protein)
						Q6PH06	crkl	V-crk avian sarcoma virus CT10 oncogene homolog-like (V-crk sarcoma virus CT10 oncogene homolog (Avian)-like)
						Q6PH46	cct4	T-complex protein 1 subunit delta
						Q6PH57	gnb1	Guanine nucleotide-binding protein G(I)/G(S)/G(T) subunit beta-1 (Transducin beta chain 1)
						Q6PHD6	ilk	Integrin-linked kinase
						Q6PHD8	pa2g4b	Proliferation-associated 2G4, b
						Q6PHF1	carhsp1	Calcium-regulated heat-stable protein 1
						Q6PHG2	hpx	Hemopexin
						Q6PHH3	pdcd10a pdcd10 si:ch211-167c22.5	Programmed cell death protein 10-A
						Q6PHI8	tktb TKT tkt	Tkt protein (Transketolase) (Transketolase b)
						Q6PHJ8	myl12.1 myl9l	Myosin, light chain 12, genome duplicate 1 (Myosin, light polypeptide 9, like)
						Q6PI20	h3f3a zgc:56193 zgc:86731; h3f3b.1 zgc:110292; h3f3c zgc:64222; h3f3d zgc:56418	Histone H3.3
						Q6PI52	calm1a zgc:63926; calm1b; calm2a calm2d; calm2b zgc:64036; calm3a calm2g zgc:86728; calm3b zgc:76987	Calmodulin (CaM)
						Q6PUF3	hsd11b1l hsd11b3 hsd3 si:dkey-78l4.15 zgc:56373	Hydroxysteroid 11-beta-dehydrogenase 1-like protein (EC 1.1.1.-) (11-beta-hydroxysteroid dehydrogenase type 3) (11-DH3) (11-beta-HSD3)
						Q6Q415	rpl36	60S ribosomal protein L36
						Q6Q417	rpl7	Ribosomal protein L7
						Q6Q419	rps29	Ribosomal protein S29
						Q6Q420	rps15a	Ribosomal protein S15a
						Q6Q421	rps15	Ribosomal protein S15
						Q6TEL1	rad21a rad21 SCC1	Double-strand-break repair protein rad21 homolog A (SCC1 homolog) [Cleaved into: 64-kDa C-terminal product (64-kDa carboxy-terminal product)]
						Q6TEN9	cpne1 CPNE3 cpne3l	Copine I (Copine III)
						Q6TEP1	fam91a1 si:dkey-5e12.2 zgc:63609	Protein FAM91A1
						Q6TGT3	dynlt3 TCTE1L tcte1l	Dynein, light chain, Tctex-type 3 (Dynlt3 protein) (T-complex-associated-testis-expressed 1-like)
						Q6TGT9	srsf5a SFRS5 sfrs5 sfrs5a	Serine and arginine-rich-splicing factor 5a (Splicing factor, arginine/serine-rich 5)
						Q6TGV5	psmd10 PSMD10	Gankyrin (Proteasome 26S subunit, non-ATPase 10) (Proteasome 26S subunit, non-ATPase, 10)
						Q6TGV6	psma5 PSMA5	Proteasome subunit alpha type (EC 3.4.25.1)
						Q6TGV7	abracl si:dkey-34f16.3	Costars family protein ABRACL (ABRA C-terminal-like protein)
						Q6TGW9	neil1 NEIL1	Nei endonuclease VIII-like 1 (Nei-like DNA glycosylase 1)
						Q6TGY8	emc2 ttc35 zgc:86891	ER membrane protein complex subunit 2 (Tetratricopeptide repeat protein 35) (TPR repeat protein 35)
						Q6TGZ7	jpt1b HN1 hn1b zgc:73237	HN1 protein (Hematological and neurological expressed 1) (Jupiter microtubule-associated homolog 1b) (Zgc:73237)
						Q6TH01	si:dkey-29f10.1 zgc:86838	Protein C10
						Q6TH03	gng5 GNG5	Guanine nucleotide-binding protein subunit gamma
						Q6TH07	flot1b FLOT1	Flotillin 1 (Flotillin 1b)
						Q6TH20	drg2 DRG2	Developmentally-regulated GTP-binding protein 2 (Drg2 protein)
						Q6TH22	ddi2	Protein DDI1 homolog 2 (EC 3.4.23.-)
						Q6TH32	cfl1 CFL2 cfl2l	Cofilin 1 (Muscle cofilin 2)
						Q6TLF6	rgn zgc:92078	Regucalcin (RC) (Gluconolactonase) (GNL) (EC 3.1.1.17)
						Q6TLG8	rps3	Ribosomal protein S3
						Q6TNP9	tuba8l TUBA2 DKEYP-53E12.1-001	Tubulin alpha chain
						Q6TNR0	rnaseh2a RNASEH2A	Ribonuclease (EC 3.1.26.4)
						Q6TNT8	gnai2a GNAI2 gnai2l	Guanine nucleotide binding protein (G protein), alpha inhibiting activity polypeptide 2 (Guanine nucleotide binding protein (G protein), alpha inhibiting activity polypeptide 2, like) (Guanine nucleotide-binding protein (G protein), alpha-inhibiting activity polypeptide 2a)
						Q6TNT9	gdi2 GDI2	Rab GDP dissociation inhibitor
						Q6TNU6	dldh DLD	Dihydrolipoyl dehydrogenase (EC 1.8.1.4)
						Q6TNV0	cox4i1 COX4I1	Cytochrome c oxidase subunit 4I1 (Cytochrome c oxidase subunit IV isoform 1)
						Q6TNW3	abce1 ABCE1	ATP-binding cassette, sub-family E (OABP), member 1
						Q6WFZ4	mtx2	Metaxin 2 (Mtx2 protein)
						Q6XG62	icn	Protein S100 (S100 calcium-binding protein)
						Q6YBS2	cap1	Adenylyl cyclase-associated protein
						Q6YI49	uchl1	Ubiquitin carboxyl-terminal hydrolase (EC 3.4.19.12)
						Q6YLH9	cav1 CAV1	Caveolin
						Q6ZM12	hbba2 OTTDARP00000002003 bY187G17.6-001	Hemoglobin, beta adult 2 (Novel beta globin)
						Q6ZM13	hbaa2 OTTDARP00000002011 si:ch211-5k11.6 si:xx-by187g17.5 bY187G17.5-001	Hemoglobin, alpha adult 2 (Novel alpha globin)
						Q6ZM17	si:ch211-5k11.8 OTTDARP00000002008 si:xx-by187g17.1 bY187G17.1-001	Novel protein similar to zebrafish hemoglobin alpha-adult 1 (Hbaa1) (Si:ch211-5k11.8) (Si:xx-by187g17.1)
						Q6ZM19	eif6 si:ch211-239j9.6	Eukaryotic translation initiation factor 6 (eIF-6)
						Q6ZM23	cox6c si:ch211-239j9.2	Cytochrome c oxidase subunit 6C
						Q6ZM24	tomm34	Translocase of outer mitochondrial membrane 34
						Q6ZM34	vps35	Vacuolar protein sorting-associated protein 35
						Q6ZM50	capza1b si:dkey-16k6.1	F-actin-capping protein subunit alpha
						Q6ZM62	arpc3	Actin-related protein 2/3 complex subunit 3
						Q75U66	postnb PN postn	Periostin (Periostin, osteoblast specific factor) (Periostin, osteoblast-specific factor b)
						Q7SX58	coro1a	Coronin
						Q7SX94	pfdn6 zgc:66282	Prefoldin subunit 6 (Zgc:66282) (Zgc:66282 protein)
						Q7SXA1	atp6v0e1 rpl26	Ribosomal protein L26 (Rpl26 protein)
						Q7SXA3	rps27a zgc:66168	Ribosomal protein S27a (Zgc:66168) (Zgc:66168 protein)
						Q7SXG4	uba2 sae2 sae2b uble1b si:ch211-149o7.1 zgc:66354	SUMO-activating enzyme subunit 2 (EC 2.3.2.-) (Ubiquitin-like 1-activating enzyme E1B) (Ubiquitin-like modifier-activating enzyme 2)
						Q7SXI1	cox7a2l cox7a3	Cox7a2l protein (Cytochrome c oxidase subunit 7A2-like) (Cytochrome c oxidase subunit VIIa polypeptide 2 like)
						Q7SXL4	nme2b.2 ndpkz2	Nucleoside diphosphate kinase (EC 2.7.4.6)
						Q7SXM1	cox6b2 zgc:66195	Cytochrome c oxidase subunit
						Q7SXN2	hnrnpdl hnrpdl	Heterogeneous nuclear ribonucleoprotein D-like
						Q7SXN5	dnm1l zgc:66163	Dynamin-1-like protein (EC 3.6.5.5)
						Q7SXP1	capzb	F-actin-capping protein subunit beta
						Q7SXR3	maea zgc:63708	E3 ubiquitin-protein transferase MAEA (EC 2.3.2.27) (Macrophage erythroblast attacher)
						Q7SXR6	scamp2l	Secretory carrier-associated membrane protein (Secretory carrier membrane protein)
						Q7SXX4	hpcal1 zgc:63695	Hippocalcin-like 1 (Zgc:63695)
						Q7SYD0	cbr1	Carbonyl reductase 1
						Q7SYH6	pah DKEY-264K15.3-001	Pah (Phenylalanine hydroxylase)
						Q7SYK7	got2a got2	Aspartate aminotransferase (EC 2.6.1.1)
						Q7SYM1	foxk1	Forkhead box K1
						Q7SZC2	cse1l xpo2	Exportin-2 (Exp2) (Chromosome segregation 1-like protein) (Importin-alpha re-exporter)
						Q7SZD2	pdap1a slc16a8	Pdgfa-associated protein 1a (Solute carrier family 16 (Monocarboxylic acid transporters), member 8)
						Q7SZE3	llgl2 pen	Lethal(2) giant larvae protein homolog 2 (Protein penner)
						Q7SZE5	sec23a	Protein transport protein Sec23A (SEC23-related protein A)
						Q7SZP4	zgc:65851	Zgc:65851
						Q7SZQ6	arhgdig	Rho GDP dissociation inhibitor (GDI) gamma
						Q7SZR4	pgam1a	Phosphoglycerate mutase (EC 5.4.2.11) (EC 5.4.2.4)
						Q7SZR5	sumo1 zgc:65934 zgc:85634	Small ubiquitin-related modifier 1 (SUMO-1)
						Q7T1D8	phb	Phb (Phb protein) (Prohibitin)
						Q7T1J9	rps10	Ribosomal protein S10
						Q7T1K0	rpl17 zgc:65996	Ribosomal protein L17 (Zgc:65996)
						Q7T2A5	eif3l eif3eip eif3s6ip	Eukaryotic translation initiation factor 3 subunit L (eIF3l) (Eukaryotic translation initiation factor 3 subunit 6-interacting protein) (Eukaryotic translation initiation factor 3 subunit E-interacting protein)
						Q7T2A8	sh3bgrl zgc:64130	SH3 domain-binding glutamic acid-rich-like protein
						Q7T2B9	mtpn	Myotrophin
						Q7T2C5	prkcba prkcb1l	Protein kinase C (EC 2.7.11.13)
						Q7T2C6	rab7a rab7	RAB7, member RAS oncogene family (RAB7a, member RAS oncogene family) (Rab7 protein)
						Q7T2C8	txnrd3 txnrd1	Thioredoxin reductase 1 (Thioredoxin reductase 3) (Txnrd1 protein)
						Q7T2D2	arrb2b arrb2	Arrb2b protein (Arrestin, beta 2b)
						Q7T2E1	sec13 sec13l1 DKEY-72G22.2-001	SEC13 homolog (S. cerevisiae) (SEC13 homolog, nuclear pore and COPII coat complex component) (SEC13-like 1 (S. cerevisiae))
						Q7T2E3	csnk1da csnk1dl si:ch211-234h8.6	Casein kinase I isoform delta-A (CKI-delta-A) (CKId-A) (EC 2.7.11.1) (Casein kinase I isoform delta-like)
						Q7T2F2	mapkapk2a	Mitogen-activated protein kinase-activated protein kinase 2a
						Q7T2F5	napab NAPA napa	N-ethylmaleimide sensitive fusion protein attachment protein alpha (N-ethylmaleimide-sensitive factor attachment protein, alpha) (N-ethylmaleimide-sensitive factor attachment protein, alpha b)
						Q7T2J4	adh8b	Alcohol dehydrogenase 8b (Mixed alcohol dehydrogenase Adh8b)
						Q7T2K9	sfrp1a sfrp1	Secreted frizzled-related protein 1 (Secreted frizzled-related protein 1a) (Sfrp1a)
						Q7T2P2	cct3	T-complex protein 1 subunit gamma
						Q7T303	cnn3a cnn3	Calponin
						Q7T309	serpinb1l3	Serpin peptidase inhibitor, clade B (ovalbumin), member 1,-like 3
						Q7T314	tomm40	translocase of Outer mitochondrial membrane 40 homolog (Yeast)
						Q7T334	mdh2 zgc:64133	Malate dehydrogenase (EC 1.1.1.37)
						Q7T339	chmp5	Charged multivesicular body protein 5 (Chromatin-modifying protein 5)
						Q7T340	drg1	Developmentally-regulated GTP-binding protein 1
						Q7T356	ywhabb ywhab ywhab2 zgc:64092	14-3-3 protein beta/alpha-B
						Q7T358	gspt1l gspt1	G1 to S phase transition 1 (G1 to S phase transition 1,-like)
						Q7T368	pdhb	Pyruvate dehydrogenase (Lipoamide) beta (Pyruvate dehydrogenase E1 beta subunit)
						Q7T370	cdv3	Protein CDV3 homolog
						Q7T372	arpc1b	Actin-related protein 2/3 complex subunit
						Q7T385	atp6v1c1a atp6v1c1 zgc:64034	V-type proton ATPase subunit C 1-A (V-ATPase subunit C 1-A) (Vacuolar proton pump subunit C 1-A)
						Q7T387	abhd14b zgc:64031	Abhydrolase domain-containing 14B (Zgc:64031)
						Q7T394	pafah1b1a lis1b si:dkey-95O3.1	Lissencephaly-1 homolog A (Platelet-activating factor acetylhydrolase IB subunit alpha a)
						Q7T3B0	eif3m si:ch211-4l14.1 zgc:63996	Eukaryotic translation initiation factor 3 subunit M (eIF3m)
						Q7T3B1	psmc2	Proteasome (Prosome, macropain) 26S subunit, ATPase 2 (Proteasome 26S subunit, ATPase 2) (Psmc2 protein)
						Q7T3B8	naa10 ard1a	ARD1 homolog a, N-acetyltransferase (Ard1a protein) (N(alpha)-acetyltransferase 10, NatA catalytic subunit)
						Q7T3C6	nudt21 cpsf5	Cleavage and polyadenylation specificity factor subunit 5 (Nudix hydrolase 21)
						Q7T3C9	srp19	Signal recognition particle 19
						Q7T3D3	gnai1	Guanine nucleotide-binding protein (G protein), alpha-inhibiting activity polypeptide 1
						Q7T3D4	cdc73 hrpt2	Cdc73 protein (Cell division cycle 73, Paf1/RNA polymerase II complex component, homolog (S. cerevisiae)) (Vcell division cycle 73, Paf1/RNA polymerase II complex component, homolog (S. cerevisiae))
						Q7T3D5	pdcd6	Programmed cell death 6
						Q7T3F0	tpm4a tpm4	Tropomyosin 4 (Tropomyosin 4a)
						Q7T3F3	ube2nb ube2nl	Ubiquitin-conjugating enzyme E2N-like (Ubiquitin-conjugating enzyme E2Nb)
						Q7T3G2	ywhah	Tyrosine 3-monooxygenase/tryptophan 5-monooxygenase activation protein, eta polypeptide
						Q7T3H5	gpd1c gpd1	Glycerol-3-phosphate dehydrogenase [NAD(+)] (EC 1.1.1.8)
						Q7ZSZ0	rab1ab rab1a	RAB1A, member RAS oncogene family (RAB1A, member RAS oncogene family b) (Rab1a protein)
						Q7ZSZ9	rac1a rac1	Rac family small GTPase 1a (Rac1) (Rac1 protein) (Ras-like protein Rac1a) (Ras-related C3 botulinum toxin substrate 1 (Rho family, small GTP binding protein Rac1))
						Q7ZTS2	cldni	Claudin
						Q7ZTS4	krt18 dapk1	Keratin, type I cytoskeletal 18 (Cytokeratin-18) (CK-18) (Dorsal aorta proneprin kinesin-1) (DreK18) (Keratin-18) (K18)
						Q7ZTS8	elavl1a elavl1	ELAV-like protein
						Q7ZTX2	wdr5	WD repeat domain 5 (Wdr5 protein)
						Q7ZTY5	eif2b3	Eukaryotic translation initiation factor 2B, subunit 3 gamma
						Q7ZTZ4	fbl	Fibrillarin
						Q7ZU20
						Q7ZU42	ola1 zgc:55768	Obg-like ATPase 1
						Q7ZU46	hspa4a hspa4l	Heat shock protein 4, like (Heat shock protein 4a) (Hspa4l protein)
						Q7ZU48	hnrnpa0l hnrpa0l	Heterogeneous nuclear ribonucleoprotein A0,-like (Hnrpa0l protein)
						Q7ZU67	eif4a1b	Eukaryotic translation initiation factor 4A, isoform 1B (Eukaryotic translation initiation factor 4A1B)
						Q7ZU69	psmd13	Proteasome (Prosome, macropain) 26S subunit, non-ATPase, 13 (Proteasome 26S subunit, non-ATPase 13)
						Q7ZU89	arcn1b arcn1l	Coatomer subunit delta
						Q7ZU93	snu13a nhp2l1a zgc:56066	SNU13 homolog, small nuclear ribonucleoprotein a (U4/U6.U5) (Zgc:56066) (Zgc:56066 protein)
						Q7ZU96	cct8	Cct8 protein (Chaperonin-containing TCP1, subunit 8 (theta))
						Q7ZU99	vcp cdc48 si:ch211-113n10.2	Transitional endoplasmic reticulum ATPase (TER ATPase) (EC 3.6.4.6) (Protein CDC48) (Valosin-containing protein) (VCP)
						Q7ZUC2	sdf4 cab45 zgc:76916	45 kDa calcium-binding protein (Cab45) (Stromal cell-derived factor 4) (SDF-4)
						Q7ZUC5	prkcda prkcd	Protein kinase C delta type (EC 2.7.11.13) (nPKC-delta)
						Q7ZUD3	gmfb	Glia maturation factor, beta (Gmfb protein)
						Q7ZUD6	rtn3 rtn3-001	Reticulon
						Q7ZUG4	rab5ab rab5al	RAB5A, member RAS oncogene family like (RAB5A, member RAS oncogene family, b)
						Q7ZUG5	rps21	40S ribosomal protein S21
						Q7ZUG6	rpl30	Ribosomal protein L30
						Q7ZUH1	rtraf zgc:56576	RNA transcription, translation and transport factor protein
						Q7ZUI0	rpl5a	Ribosomal protein L5a
						Q7ZUI4	zgc:56493	Thioredoxin
						Q7ZUI8	eif1b GC20	Eukaryotic translation initiation factor 1B (Translation factor sui1 homolog)
						Q7ZUJ8	psmb3	Proteasome subunit beta (EC 3.4.25.1)
						Q7ZUK9	rprd1b	Regulation of nuclear pre-mRNA domain-containing 1B
						Q7ZUM0	ywhaqa ywhaq2	Tyrosine 3-monooxygenase/tryptophan 5-monooxygenase activation protein, theta polypeptide a
						Q7ZUN6	paics	Phosphoribosylaminoimidazole carboxylase, phosphoribosylaminoimidazole succinocarboxamide synthetase
						Q7ZUN7	ckmt1	Ckmt1 protein (Creatine kinase, mitochondrial 1)
						Q7ZUQ0	arpc1a ARPC1A	Actin-related protein 2/3 complex subunit
						Q7ZUQ1	cdc42l	Cdc42l protein (Cell division cycle 42,-like) (Ras-like protein Cdc42c)
						Q7ZUQ2	ppp2r5eb ppp2r5e1	Serine/threonine protein phosphatase 2A regulatory subunit
						Q7ZUS7	ppp6c	Serine/threonine-protein phosphatase (EC 3.1.3.16)
						Q7ZUV1	plekhf2 zgc:56073	Pleckstrin homology domain-containing family F member 2 (PH domain-containing family F member 2)
						Q7ZUV5	rab1ba zgc:56049	ZRAB1B, member RAS oncogene family a (Zgc:56049) (Zgc:56049 protein)
						Q7ZUX8	dynlrb1	Dynein light chain roadblock
						Q7ZUY0	seta	SET nuclear proto-oncogene a (SET translocation (Myeloid leukemia-associated) A)
						Q7ZUZ2	actr1 zgc:56317	Actin-related protein 1, centractin (Zgc:56317)
						Q7ZUZ4	pdcd5	Programmed cell death 5
						Q7ZUZ7	arf2b arf1l	ADP-ribosylation factor 1 (ADP-ribosylation factor 1 like) (ADP-ribosylation factor 2b) (Arf1l protein)
						Q7ZV05	rps11	Ribosomal protein S11
						Q7ZV08	scamp2	Secretory carrier-associated membrane protein (Secretory carrier membrane protein)
						Q7ZV22	mtap zgc:66012	S-methyl-5'-thioadenosine phosphorylase (EC 2.4.2.28) (5'-methylthioadenosine phosphorylase) (MTA phosphorylase) (MTAP) (MTAPase)
						Q7ZV23	snu13b nhp2l1 nhp2l1b	NHP2 non-histone chromosome protein 2-like 1 (S. cerevisiae) (SNU13 homolog, small nuclear ribonucleoprotein b (U4/U6.U5))
						Q7ZV25	tbca	Tubulin-specific chaperone A
						Q7ZV26	inip ssbip1 zgc:56259	SOSS complex subunit C (INTS3- and NABP-interacting protein) (Sensor of single-strand DNA complex subunit C) (Sensor of ssDNA subunit C) (SOSS-C) (Single-stranded DNA-binding protein-interacting protein 1) (SSB-interacting protein 1)
						Q7ZV39	zgc:56235	Zgc:56235
						Q7ZV55	eif3i eif3s2	Eukaryotic translation initiation factor 3 subunit I (eIF3i) (Eukaryotic translation initiation factor 3 subunit 2) (eIF-3-beta) (eIF3 p36)
						Q7ZV68	vps29 zK83d9.2-001	Vacuolar protein sorting-associated protein 29 (Vesicle protein sorting 29)
						Q7ZV77	psma4	Proteasome subunit alpha type (EC 3.4.25.1)
						Q7ZV82	rpl27 zgc:56171	60S ribosomal protein L27
						Q7ZV92	prpf19 prp19	PRP19/PSO4 homolog (S. cerevisiae) (Pre-mRNA-processing factor 19) (Prp19 protein)
						Q7ZV93	gipc2	GAIP c-terminus interacting protein 2 (GIPC PDZ domain-containing family, member 2) (Gipc2 protein)
						Q7ZV96	rpl10 QM	60S ribosomal protein L10 (Protein QM) (Ribosomal protein L10)
						Q7ZVA4	s100a10b	Protein S100 (S100 calcium-binding protein)
						Q7ZVB1	chmp1b zgc:56134	Charged multivesicular body protein 1b (Chromatin-modifying protein 1b) (CHMP1b)
						Q7ZVB2	aldh9a1a aldh9a1l	Aldehyde dehydrogenase family 9 member A1-A (EC 1.2.1.3)
						Q7ZVF3	sdha si:dkeyp-84f11.2	Succinate dehydrogenase [ubiquinone] flavoprotein subunit, mitochondrial (EC 1.3.5.1) (Flavoprotein subunit of complex II) (Fp)
						Q7ZVF9	actbb bactin2	Actin, cytoplasmic 2 (Beta-actin-2) [Cleaved into: Actin, cytoplasmic 2, N-terminally processed]
						Q7ZVG7
						Q7ZVI7	actba bact bactin1 bactzf	Actin, cytoplasmic 1 (Beta-actin-1) [Cleaved into: Actin, cytoplasmic 1, N-terminally processed]
						Q7ZVI8	nploc4	NPL4 homolog, ubiquitin recognition factor (Nploc4 protein) (Nuclear protein localization 4 homolog (S. cerevisiae))
						Q7ZVJ0	pfn2l	Profilin
						Q7ZVK2	ube2g1a ube2g2	Ubiquitin-conjugating enzyme E2G 1a (UBC7 homolog, yeast) (Ubiquitin-conjugating enzyme E2G 2)
						Q7ZVK5	pcbp2 PCBP2	Pcbp2 protein (Poly(rC)-binding protein 2)
						Q7ZVK8	mapk3	Mitogen-activated protein kinase (EC 2.7.11.24)
						Q7ZVM5	tubg1 tubgl	Tubulin gamma chain
						Q7ZVM6	tia1l	Cytotoxic granule-associated RNA-binding protein 1,-like
						Q7ZVN5	srp54 SRP54	Signal recognition particle 54 kDa protein
						Q7ZVP2	rab5c	RAB5C, member RAS oncogene family (Rab5c protein)
						Q7ZVT2	pkma pkm2a	Pyruvate kinase (EC 2.7.1.40)
						Q7ZVX4	rab14	RAB14, member RAS oncogene family (Rab14 protein)
						Q7ZVX6	uba3 ube1c zgc:55528	NEDD8-activating enzyme E1 catalytic subunit (EC 6.2.1.-) (NEDD8-activating enzyme E1C) (Ubiquitin-activating enzyme E1C) (Ubiquitin-like modifier-activating enzyme 3) (Ubiquitin-activating enzyme 3)
						Q7ZVX8	atp6v1d	ATPase H+-transporting V1 subunit D (ATPase, H+ transporting, V1 subunit D)
						Q7ZVY0	tia1	Cytotoxic granule-associated RNA binding protein 1 (TIA1 cytotoxic granule-associated RNA-binding protein)
						Q7ZW04
						Q7ZW09	hnrnpl hnrpl zgc:55429	Heterogeneous nuclear ribonucleoprotein L (Zgc:55429) (Zgc:55429 protein)
						Q7ZW20	ywhae1	Tyrosine 3-monooxygenase/tryptophan 5-monooxygenase activation protein, epsilon polypeptide 1 (Ywhae1 protein)
						Q7ZW27	arcn1a arcn1	Coatomer subunit delta
						Q7ZW38	sephs1 si:ch211-220f12.5	Selenide, water dikinase 1 (EC 2.7.9.3) (Selenium donor protein 1) (Selenophosphate synthase 1)
						Q7ZW78	rnf181 si:ch211-102c2.10 zgc:56424	E3 ubiquitin-protein ligase RNF181 (EC 2.3.2.27) (RING finger protein 181) (RING-type E3 ubiquitin transferase RNF181)
						Q7ZW92	strap	Serine/threonine kinase receptor-associated protein
						Q7ZW95	rpl4 CH211-242M18.3-001	Ribosomal protein L4
						Q7ZWA9	eif5	Eukaryotic translation initiation factor 5
						Q7ZWD3	eif2s1a eif2s1l	Eif2s1l protein (Eukaryotic translation initiation factor 2, subunit 1 alpha a) (Eukaryotic translation initiation factor 2, subunit 1 alpha, like)
						Q7ZWD4	uap1l1 zgc:56509	UDP-N-acetylhexosamine pyrophosphorylase-like protein 1 (EC 2.7.7.-)
						Q7ZWD8	cfl1l CFL1 cfl1	Cfl1 protein (Cofilin 1 (non-muscle),-like) (Non-muscle cofilin 1)
						Q7ZWE9	cmpk cmpk1	UMP-CMP kinase (EC 2.7.4.14) (Deoxycytidylate kinase) (CK) (dCMP kinase) (Nucleoside-diphosphate kinase) (EC 2.7.4.6) (Uridine monophosphate/cytidine monophosphate kinase) (UMP/CMP kinase) (UMP/CMPK)
						Q7ZWH4	arpc5b	Actin-related protein 2/3 complex subunit 5
						Q7ZWJ4	rpl18a zgc:56546	60S ribosomal protein L18a
						Q7ZYX7	psmd7	Proteasome (Prosome, macropain) 26S subunit, non-ATPase, 7 (Mov34 homolog) (Proteasome 26S subunit, non-ATPase 7) (Psmd7 protein)
						Q7ZYY0	acad8	Acyl-CoA dehydrogenase family, member 8 (Acyl-Coenzyme A dehydrogenase family, member 8)
						Q7ZZ04	echs1	Enoyl CoA hydratase, short chain, 1, mitochondrial
						Q7ZZ37	ppp1r14bb ppp1r14b	Ppp1r14b protein (Protein phosphatase 1, regulatory (Inhibitor) subunit 14B) (Protein phosphatase 1, regulatory (inhibitor) subunit 14Bb)
						Q7ZZJ7	slc4a1a ae1 slc4a1	Anion exchange protein
						Q800H6	matr3l1.1	Matrin 3-like 1.1
						Q801E6	mdh1aa MDH1 mdh1a mdhA	Malate dehydrogenase (EC 1.1.1.37)
						Q801Y4	crabp2a crabp2	Cellular retinoic acid binding protein type II (Cellular retinoic acid-binding protein 2, a) (Crabp2a protein)
						Q802C9	eif4a1a	Eukaryotic translation initiation factor 4A, isoform 1A (Eukaryotic translation initiation factor 4A1A)
						Q802D5	pfn2	Profilin
						Q802F3	selenof cb29 sep15 zgc:86882	Selenoprotein F (15 kDa selenoprotein)
						Q802U9	papss2b papss2	3'-phosphoadenosine 5'-phosphosulfate synthase 2 (3'-phosphoadenosine 5'-phosphosulfate synthase 2b)
						Q802Z0	ythdf1	YTH N(6)-methyladenosine RNA-binding protein 1 (YTH domain family, member 1)
						Q802Z5	nono	Non-POU domain-containing, octamer-binding
						Q803B0	hspd1	Heat shock 60 protein 1 (Heat shock 60kD protein 1 (Chaperonin)) (Hspd1 protein)
						Q803E5	etf1b ETF1 etf1	Eukaryotic translation termination factor 1 (Eukaryotic translation termination factor 1b)
						Q803F2	rhogb	Ras homolog family member Gb (Ras homolog gene family, member Gb) (Rhogb protein)
						Q803F6	rpsa lamr1	40S ribosomal protein SA (37 kDa laminin receptor precursor) (37LRP) (37/67 kDa laminin receptor) (LRP/LR) (67 kDa laminin receptor) (67LR) (Laminin receptor 1) (LamR) (Laminin-binding protein precursor p40) (LBP/p40)
						Q803G3	ppp2cb	Serine/threonine-protein phosphatase (EC 3.1.3.16)
						Q803H5	gnb1b gnb1l	Gnb1l protein (Guanine nucleotide binding protein (G protein), beta polypeptide 1, like) (Guanine nucleotide-binding protein (G protein), beta polypeptide 1b)
						Q803I7	psat1	Phosphoserine aminotransferase (EC 2.6.1.52)
						Q803J2	ube2na ube2n CH211-276P10.3-001	Ube2n protein (Ubiquitin-conjugating enzyme E2N) (Ubiquitin-conjugating enzyme E2Na)
						Q803J3	rab2a	RAB2A, member RAS oncogene family (Rab2a protein)
						Q803K8	creb1a creb1 creb1b	Creb1 protein (cAMP responsive element binding protein 1) (cAMP-responsive element-binding protein 1a)
						Q803L5	stk38a zgc:55572	Non-specific serine/threonine protein kinase (EC 2.7.11.1)
						Q803M1	tpm3	Tropomyosin 3
						Q803M7	arpc5a	Actin-related protein 2/3 complex subunit 5
						Q803M8	ywhaqb ywhaq1 ywhaz	Tryosine 3-monooxygenase/tryptophan 5-monooxygenase activation protein, zeta polypeptide (Tyrosine 3-monooxygenase/tryptophan 5-monooxygenase activation protein, theta polypeptide b)
						Q803N7	csnk2a1 ck2a1	Casein kinase 2 alpha 1 (Casein kinase 2, alpha 1 polypeptide) (Ck2a1 protein)
						Q803P2	tcp1	T-complex 1 (Tcp1 protein)
						Q803Q7	aldoaa aldoa	Fructose-bisphosphate aldolase (EC 4.1.2.13)
						Q803T5	ahcy AHCY	Adenosylhomocysteinase (EC 3.3.1.1)
						Q803U3
						Q803U6	aqp3a aqp3	Aqp3 protein (Aquaporin 3) (Aquaporin-3a)
						Q803V2	prpsap2	Phosphoribosyl pyrophosphate synthetase-associated protein 2
						Q803W0	ddx39ab ddx39b CH211-106H11.2-001	DEAD (Asp-Glu-Ala-Asp) box polypeptide 39Ab (DEAD (Asp-Glu-Ala-Asp) box polypeptide 39b) (Ddx39b protein)
						Q803W9
						Q804G7	anxa4	Annexin
						Q804H0	anxa1c	Annexin
						Q804H2	anxa1a	Annexin
						Q8AW07	psmd12	Proteasome (Prosome, macropain) 26S subunit, non-ATPase, 12 (Proteasome 26S subunit, non-ATPase 12) (Psmd12 protein)
						Q8AW82	pa2g4a dZ150I12.2-001	Novel protein similar to human proliferation-associated 2G4 protein (PA2G4) (Proliferation-associated 2G4, a)
						Q8AWD0	vdac2	Vdac2 protein (Voltage-dependent anion channel 2)
						Q8AWD4	tax1bp3	Tax1-binding protein 3
						Q8AXX6	ppp2r5ea ppp2r5e2	Serine/threonine protein phosphatase 2A regulatory subunit
						Q8AY63	ckbb ckb	Brain-subtype creatine kinase (Creatine kinase, brain b)
						Q8AYE3	serpinc1	Antithrombin (Serine (Or cysteine) proteinase inhibitor, clade C (Antithrombin), member 1) (Serpin peptidase inhibitor, clade C (antithrombin), member 1)
						Q8JFT7	kpna3 dZ79F24.2-001	Importin subunit alpha
						Q8JFV8	vat1 si:dz163l24.2	Synaptic vesicle membrane protein VAT-1 homolog (EC 1.-.-.-)
						Q8JFW7	bcap31 bZ30I22.4-001	B cell receptor-associated protein 31 (Novel protein similar to vertebrate caldesmon 1 (CALD1))
						Q8JG73	csnk1a1	Casein kinase 1, alpha 1 (Casein kinase 1alpha S)
						Q8JGR7	ints7 si:dkey-176n7.1	Integrator complex subunit 7 (Int7)
						Q8JGS0	snrpc	U1 small nuclear ribonucleoprotein C (U1 snRNP C) (U1-C) (U1C)
						Q8JGS9	rps18 ke3	40S ribosomal protein S18
						Q8JH29	agt	Angiotensinogen
						Q8JH70	aldocb aldoc	Fructose-bisphosphate aldolase C-B (EC 4.1.2.13) (Brain-type aldolase-B)
						Q8JH71	aldob	Fructose-bisphosphate aldolase B (EC 4.1.2.13) (Liver-type aldolase)
						Q8JHI0	slc25a5 SLC25A5	Solute carrier family 25 alpha, member 5 (Solute carrier family 25 member 5) (Solute carrier family 25 member 5 protein) (Solute carrier family 25, member 5)
						Q8JHJ1	rpl35	60S ribosomal protein L35
						Q8QGV5	ptgdsb.1 ptgds ptgdsb	Lipocalin-type prostaglandin D synthase-like protein (Prostaglandin D2 synthase b, tandem duplicate 1) (Ptgds protein)
						Q8UUX0	akt2	Non-specific serine/threonine protein kinase (EC 2.7.11.1)
						Q8UVG7	fabp3	Fatty acid-binding protein 3, muscle and heart (Heart-type fatty-acid binding protein)
						Q8UVK2	supt6h pan spt6	Transcription elongation factor SPT6 (Protein pandora)
						Q90485	ba2 si:dz118j2.3; ba2l si:dz118j2.1 zgc:92900	Hemoglobin subunit beta-2 (Beta-2-globin) (Beta-A2-globin) (Hemoglobin beta-2 chain)
						Q90487	hbaa1	Hemoglobin subunit alpha (Alpha-globin aa1) (Hemoglobin alpha chain)
						Q90WA5	pdia6 pdip5	Protein disulfide isomerase family A, member 6 (Protein disulfide isomerase-related protein P5)
						Q90X41	sf3a1 dZ150F13.2-001	Novel protein similar to human splicing factor 3a, subunit 1, 120kD (SF3A1) (Sf3a1 protein) (Splicing factor 3a, subunit 1)
[truncated: 428 more rows]

## Sheet: Table S8B
this study			Kessels et al. 2014 PlosOne			Singh et al. 2011 J Sep Sci			Rabinowitz et al. 2017 PNAS			Saxena et al. 2012 Mol Cell Proteomics
Uniprot Accession	Gene name	Protein name	Uniprot Accession	Gene name	Protein name	Uniprot Accession	Gene name	Protein name	Uniprot Accession	Gene name	Protein name	Uniprot Accession	Gene name	Protein name
A0A068F9P7	b3glcta	Beta-3-glucosyltransferase a	F1QV32			B3DFP9	apoa2 zgc:193613	Apolipoprotein A-II (Zgc:193613)	A0A0A0MPL4	stx7l	Syntaxin 7-like	Q7SYH6	pah DKEY-264K15.3-001	Pah (Phenylalanine hydroxylase)
A0A097	tmsb1 si:dkey-152p16.6 Tbeta-a	Thymosin beta	C7DZK3	col27a1a	Collagen alpha-1(XXVII) chain A	B0S5C5	acaa2	Acetyl-CoA acyltransferase 2	A0A0B4J1A5	ewsr1a	EWS RNA-binding protein 1a	B3DG37	ba1 ba1l	Ba1 protein (Ba1l protein)
E7FCU0	npm1a	Nucleophosmin 1a	F1R147	pla2g12b	Phospholipase A2, group XIIB	Q6PC29	ywhag1 ywhag zgc:73131	14-3-3 protein gamma-1	A0A0B4J1A7			Q90486	ba1 si:by187g17.2 zgc:123164; ba1l si:by187g17.4	Hemoglobin subunit beta-1 (Beta-1-globin) (Beta-A1-globin) (Hemoglobin beta-1 chain)
A0A0A0MPJ4			B8XY56	rnaset2 dre2 zgc:113369	Ribonuclease T2 (EC 3.1.27.-) (RNase Dre2)	A0JPF3	papss2a zgc:153748	Zgc:153748	A0AUQ3	ccdc6b	Ccdc6b protein (Coiled-coil domain-containing 6b)	B5WY15	ftr65 im:7151115	FinTRIM family protein (Fragment)
B0S581	dnmt3ba	DNA (cytosine-5-)-methyltransferase 3 beta, duplicate a	O42222	mstnb gdf8 mstn mstn-1 si:ch211-3o3.2	Growth/differentiation factor 8 (GDF-8) (Myostatin) (Myostatin-1) (zfMSTN-1) (Myostatin-B)	Q6P6F0	rps17 zgc:77702	Ribosomal protein S17 (Zgc:77702)	A0AUR9	gps1	G protein pathway suppressor 1 (Gps1 protein)	Q5SPF0
A0A0A0MPI6	si:dkey-5n18.1	Si:dkey-5n18.1	Q6IQP3	calua si:ch211-266a5.5	Calumenin-A	Q7ZU62	rps27a zgc:66168	Zgc:66168 protein (Fragment)	A0JME6	isoc2 zgc:109735	Isochorismatase domain-containing protein 2	Q6AZV8	hpdb hpd	4-hydroxyphenylpyruvate dioxygenase
A0A0A0MPK9	scaf4b	SR-related CTD-associated factor 4b	F1RCV3	slit3	Slit homolog 3 (Drosophila)	Q6AZV8	hpdb hpd	4-hydroxyphenylpyruvate dioxygenase	A0JMF4	sept15 sept7b	Septin 15 (Septin 7b)	Q6P3L3	hspa5	Heat shock protein 5 (Immunoglobulin binding protein)
A0A0A0MPL4	stx7l	Syntaxin 7-like	F1R2S9	ecm2	Extracellular matrix protein 2, female organ and adipocyte-specific	Q6P2T5	arpc2	Arp2/3 complex 34 kDa subunit	A0JMJ1	scinla gsnl1	Scinderin like a	Q6PHG2	hpx	Hemopexin
F1QLN5	rwdd	RWD domain-containing 4	F1QQE4	slit2	Slit homolog 2 (Drosophila)	Q9I8V1	actc1b acta1	Actin alpha cardiac muscle 1b (Actin, alpha 1, skeletal muscle) (Skeletal alpha1 actin)	A0JML7	adpgk	ADP-dependent glucokinase	Q6NWJ5	tuba8l4	Tubulin alpha chain
A0A0A0MPR4	si:ch211-15j1.4	Si:ch211-15j1.4	F1RBK0	dkk1a	Dickkopf WNT-signaling pathway inhibitor 1a (Fragment)	B8JHU4	actn1	Actinin, alpha 1 (Actn1 isoform b)	A0JMN4	csk	Tyrosine-protein kinase (EC 2.7.10.2)	Q9PUB5	krt5 CKII ckii	Type II cytokeratin
A0A0A0MPW9	si:ch211-250m6.2	Si:ch211-250m6.2	E7FAN5	f2	Coagulation factor II (thrombin)	Q8JGM2	actr3	Arp3	A0PJR0	LOC792676	LOC792676 protein (Fragment)	Q5U3E4	sugt1 sgut1 zgc:103668	SGT1 homolog, MIS12 kinetochore complex assembly cochaperone (Zgc:103668) (Zgc:103668 protein)
A0A0R4IRM2	ewsr1a	EWS RNA-binding protein 1a	F1QLC3	f10	Coagulation factor X	Q7SYE2	actn4	Actinin, alpha 4 (Actn4)	A1A5X4	add1	adducin 1 (Alpha)	Q7ZVI7	actba bact bactin1 bactzf	Actin, cytoplasmic 1 (Beta-actin-1) [Cleaved into: Actin, cytoplasmic 1, N-terminally processed]
A0A0B4J1A6	igf2bp1	Insulin-like growth factor 2 mRNA-binding protein 1	F1R886	cfb	Complement factor B	A5PMS9	ap1b1	AP complex subunit beta	A1A5X7	taf15 zgc:158363	TAF15 RNA polymerase II, TATA box-binding protein (TBP)-associated factor (Zgc:158363)	Q1LXJ0
A0A0B4J1A7			E7FCV2	c5	Complement component 5	Q6DG22	ada	Adenosine deaminase (EC 3.5.4.4) (Adenosine aminohydrolase)	A1A5Y1	mgst3b zgc:158387	Microsomal glutathione S-transferase 3b (Zgc:158387)	Q90487	hbaa1	Hemoglobin subunit alpha (Alpha-globin aa1) (Hemoglobin alpha chain)
A9C3V8	igf2bp2a	Insulin-like growth factor 2 mRNA-binding protein 2a	F1QG79	col4a1	Collagen, type IV, alpha 1	Q68EH2	ak1 AK1 zgc:91930	Adenylate kinase isoenzyme 1 (AK 1) (EC 2.7.4.3) (EC 2.7.4.6) (ATP-AMP transphosphorylase 1) (ATP:AMP phosphotransferase) (Adenylate monophosphate kinase) (Myokinase)	A1A5Y7	hmgn7 zgc:158409	High mobility group nucleosomal-binding domain 7 (Zgc:158409)	A4QN86	krt1-19d	Krt1-19d protein (Fragment)
A0A0B4P506	cbfb	Core binding factor beta subunit isoform 2 (Core-binding factor subunit beta)	E7FES0			Q08BG5	ahnak	Ahnak protein (Fragment)	A1A605	ybx1	Y-box-binding protein 1	Q6ZM17	si:ch211-5k11.8 OTTDARP00000002008 si:xx-by187g17.1 bY187G17.1-001	Novel protein similar to zebrafish hemoglobin alpha-adult 1 (Hbaa1) (Si:ch211-5k11.8) (Si:xx-by187g17.1)
A0A0F6PK88	ak2 AK2	Adenylate kinase 2, mitochondrial (AK 2) (EC 2.7.4.3) (ATP-AMP transphosphorylase 2) (ATP:AMP phosphotransferase) (Adenylate monophosphate kinase)	E9QDI1	apoc1 apoc1l	Apolipoprotein C-I	Q1JPZ2	si:dkey-180p18.9	Si:dkey-180p18.9	A1L1F4	pds5a zgc:66331	Sister chromatid cohesion protein PDS5 homolog A	F1R3G8	srm	Spermidine synthase
A0A0G2KCC7	kbtbd11	Kelch repeat and BTB (POZ) domain-containing 11	E9QEQ1	apoc2	Apolipoprotein C-II	Q803Q7	aldoaa aldoa	Fructose-bisphosphate aldolase (EC 4.1.2.13)	A1L1G1	esrp1 rbm35a zgc:154050	Epithelial splicing regulatory protein 1 (RNA-binding motif protein 35A) (RNA-binding protein 35A)	Q6P3L0	mvp	Major vault protein (MVP)
F1Q9W0			Q6NYE1	fgb	Fibrinogen beta chain (Fibrinogen, B beta polypeptide)	Q8JH71	aldob	Fructose-bisphosphate aldolase B (EC 4.1.2.13) (Liver-type aldolase)	A1L1T1	fam129ba fam129b zgc:158319	Family with sequence similarity 129 member Ba (Zgc:158319)	F1Q8P5
A0A0G2KCW6	ddb1	Damage-specific DNA-binding protein 1	Q7ZVG7	fgg	Fgg protein (Fibrinogen gamma chain) (Fibrinogen, gamma polypeptide)	B8JI90			A1L1V1	fnta zgc:158397	Farnesyltransferase, CAAX box, alpha (Zgc:158397)	Q5XJE1	cutc	CutC copper transporter homolog (E. coli)
A0A0G2KCY3	ap3b1a	Adaptor-related protein complex 3 subunit beta 1a	Q6PC07	rbp4l purpurin	Purpurin (Rbp4l) (Retinol-binding protein 4,-like)	Q1JQ69	hbaa1	Hbaa1 protein	A1L251	engase zgc:158649	Cytosolic endo-beta-N-acetylglucosaminidase (ENGase) (EC 3.2.1.96)	A7E2L4	rack1 gnb2l1	Guanine nucleotide binding protein (G protein), beta polypeptide 2-like 1
A0A0G2KD61	il16	Interleukin 16	A5WWI5	ahsg2	Alpha-2-HS-glycoprotein 2	Q9PTR4	actc1a actc1l actcl	Alpha-cardiac actin	A1XF92	crtac1a CRTAC-2 crtac1	Cartilage acidic protein 1a (Cartilage acidic protein 2)	A7YYB3	uqcrc2b uqcrc2	Ubiquinol-cytochrome c reductase core protein II
A0A0G2KDR5			F1QJB3	si:ch1073-280e3.1	Si:ch1073-280e3.1	Q6NYQ0	tpm1	Tropomyosin 1 (Alpha)	A2AR65	rca2.1	Regulator of complement activation group 2 gene 1	F1RDA6	ndufs1 ino80db	INO80 complex subunit D-B (NADH:ubiquinone oxidoreductase core subunit S1)
A0A0G2KDW7	sil1 si:ch211-195b11.7	SIL1 nucleotide exchange factor	F1QK29	pros1	Protein S	B8A5S6	amotl2b	Angiomotin-like 2b	A2AR68	gdi1	Rab GDP dissociation inhibitor	Q7ZUD3	gmfb	Glia maturation factor, beta (Gmfb protein)
A0A0G2KDX7			F1QEE7	thbs1b	Thrombospondin 1b	Q804G3	anxa11b	Annexin	A2ARG7	atp5meb atp5ib	ATP synthase membrane subunit eb	O73872	sod1 cuzn	Superoxide dismutase [Cu-Zn] (EC 1.15.1.1)
E7EZS4			E9QCG6			Q804H2	anxa1a	Annexin	A2AWA1	ddx39aa	DEAD (Asp-Glu-Ala-Asp) box polypeptide 39Aa	A5PN62	ddah2 si:dkey-46a12.1	Dimethylarginine dimethylaminohydrolase 2 (Si:dkey-46a12.1)
A0A0G2KE45			Q6DG10	mmp2	Matrix metallopeptidase 2 (Matrix metalloproteinase 2)	B8JLZ3	anxa1b	Annexin	A2AWE1	prdx1	Peroxiredoxin 1	Q6PC90	rps12	40S ribosomal protein S12
A0A0G2KER3		Uncharacterized protein	F1QQ00			Q6IQB2	zgc:86853	Annexin	A2BE49	ppm1f	Protein phosphatase, Mg2+/Mn2+-dependent, 1F	Q7T3L3	hsp90b1 GP96 tra1	Chaperone protein GP96 (Heat shock protein 90, beta (Grp94), member 1)
A0A0G2KEX1	arf4b	ADP-ribosylation factor 4b	F1R291			Q804G9	anxa2a	Annexin	A2BEN1	atp6v1aa atp6v1al	ATPase H+-transporting V1 subunit Aa	E7EXC4	serpinb14 serpinb1l4	Serpin peptidase inhibitor, clade B (ovalbumin), member 14
A0A0G2KFA2	ptpn12	Protein tyrosine phosphatase, non-receptor type 12	Q6PVV8	sparc	SPARC (Secreted protein, acidic, cysteine-rich (osteonectin))	Q804G7	anxa4	Annexin	A2BF64	ctss2.2 ctssb.2	Cathepsin S, ortholog 2, tandem duplicate 2	Q6AZC1	psmc5 wu:fa14g03 wu:fb23a11 zgc:92464	Proteasome (Prosome, macropain) 26S subunit, ATPase, 5 (Proteasome 26S subunit, ATPase 5) (Psmc5 protein)
A0A0G2KFS5	armc6	Uncharacterized protein	Q66I23	tgfb3	Transforming growth factor beta	Q6P0V8	anxa5b	Annexin	A2BF67	ensab si:dkey-30o16.6	Endosulfine alpha b	O42271	tuba1b tuba1	Tubulin alpha chain
A0A0G2KFY1	fam135b	Uncharacterized protein	A2AVJ4	bmp3	Bone morphogenetic protein 3	O42363	apoa1 apoa zgc:103718	Apolipoprotein A-I (Apo-AI) (ApoA-I) (Apolipoprotein A1) [Cleaved into: Proapolipoprotein A-I (ProapoA-I)]	A2BF91	zgc:101858	Zgc:101858	A7YT77	qdpra	Qdpra protein (Quinoid dihydropteridine reductase a)
A0A0G2KG42		Uncharacterized protein	B8JL43	tfa	Serotransferrin	Q3B7G4	apoa4b.1 apoa4	Apolipoprotein A-IV	A2BFD8	thy1	Thy-1 cell surface antigen	Q7SY26	zgc:63587	Zgc:63587
A0A0G2KHK0			F1R4X4			Q5TZ29	apobb.1 apobl	Apolipoprotein Bb, tandem duplicate 1	A2BFT4	ftr82	FinTRIM family, member 82	E9QBP0	arhgdig	Rho GDP dissociation inhibitor (GDI) gamma (Fragment)
A0A0G2KGN7			F1QC76	mmp9	Matrix metallopeptidase 9	B3DHC5	apoa4b.2 zgc:194131	Apolipoprotein A-IV b, tandem duplicate 2 (Zgc:194131)	A2BFY7	purba si:dkey-202n14.1	Purine-rich element-binding protein Ba (Si:dkey-202n14.1)	Q4VBT1	fabp1b.1 fabp1b zgc:110431	Fatty acid binding protein 1-B.1 (Fatty acid binding protein 1b) (Zf-FABP1b)
A0A0G2KGT5		Uncharacterized protein	Q1RLX2	timp2a timp2	TIMP metallopeptidase inhibitor 2a (Timp2 protein) (Tissue inhibitor of metalloproteinase 2)	Q803U6	aqp3a aqp3	Aqp3 protein (Aquaporin 3) (Aquaporin-3a)	A2BG46	ankrd13a	Ankyrin repeat domain 13A	F1QEW2	si:dkey-183i3.5	Si:dkey-183i3.5
A0A0G2KGZ7	tbc1d10aa	TBC1 domain family, member 10Aa (Fragment)	Q9PTH3	igfbp2a igfbp2 igfbp2b	Insulin-like growth factor-binding protein 2-A (IGF-binding protein 2-A) (IGFBP-2-A) (IGFBP-2a)	Q08C63	si:dkey-172m14.1	Si:dkey-172m14.1 protein (Fragment)	A2BG80	ppp2r2ab ppp2r2a	Serine/threonine-protein phosphatase 2A 55 kDa regulatory subunit B	F1Q986	hpdb	4-hydroxyphenylpyruvate dioxygenase
A0A0G2KH95	psmd2	Proteasome 26S subunit, non-ATPase 2	Q9YHV4	fsta fst fst1 si:dkey-111k10.2 si:dkeyp-88a5.1	Follistatin-A (FS) (Activin-binding protein) (Follistatin-1) (zFst1)	Q58P23	atp5fa1 atp5a1	Mitochondrial ATP synthase alpha chain (Fragment)	A2BGE2	si:dkey-103e21.5	Si:dkey-103e21.5 (Fragment)	Q6P3K5	krt5	Krt5 protein
A0A0G2KHA1			B0S525	igfbp5b	Insulin-like growth factor-binding protein 5b	B0UY91	abcd3b	ATP-binding cassette, sub-family D (ALD), member 3b (Abcd3b protein)	A2BGG0	golph3	Golgi phosphoprotein 3	A4FUP0	sult2st3	Sulfotransferase (EC 2.8.2.-)
A0A0G2KHH5			B0S5W0	col8a1a	Collagen, type VIII, alpha 1a	B3DG37	ba1 ba1l	Ba1 protein (Ba1l protein)	A2BGG1	mtmr12 si:dkey-207e22.3	Myotubularin-related protein 12 (Inactive phosphatidylinositol 3-phosphatase 12)	F1R5A5	krt5	Keratin 5
E7EYA8	fubp3	Far upstream element (FUSE)-binding protein 3	B0UXF7	col4a5	Collagen, type IV, alpha 5 (Alport syndrome)	Q7ZVI7	actba bact bactin1 bactzf	Actin, cytoplasmic 1 (Beta-actin-1) [Cleaved into: Actin, cytoplasmic 1, N-terminally processed]	A2BGI0	ccnh	Cyclin H	A9JRS6	krt4	Keratin 4 (Krt4 protein)
A0A0G2KHK8	cdc37	Cell division cycle 37 homolog (S. cerevisiae)	F1R1P9	thbs4b	Thrombospondin-4-B	Q6PE34	zgc:65894	Tubulin beta chain	A2BGK0	cds2	Phosphatidate cytidylyltransferase (EC 2.7.7.41)	E9QEA9	nqo1	NAD(P)H dehydrogenase, quinone 1 (Fragment)
A0A0G2KHM0			F1R731			Q32LQ4	bhmt wu:fb53h01 zgc:123027	Betaine--homocysteine S-methyltransferase 1 (EC 2.1.1.5)	A2BGN0	mmab si:dkey-189p24.5	Metabolism of cobalamin-associated B	Q6PBY5	si:rp71-45k5.4	Proteasome subunit alpha type (EC 3.4.25.1) (Fragment)
A0A0G2KHM6	pxdn	Peroxidasin	Q66I20	serpinf1 zgc:92072	Serpin peptidase inhibitor, clade F (alpha-2 antiplasmin, pigment epithelium-derived factor), member 1 (Zgc:92072)	Q66L49	slc25a24 scamc1 si:ch211-63o20.9 zgc:92470	Calcium-binding mitochondrial carrier protein SCaMC-1 (Small calcium-binding mitochondrial carrier protein 1) (Solute carrier family 25 member 24)	A2BGQ1	dhfr	Dihydrofolate reductase	Q24JW6	serpina1l	Serine (Or cysteine) proteinase inhibitor, clade A (Alpha-1 antiproteinase, antitrypsin), member 1, like
A0A286Y892	tsc2	TSC complex subunit 2	F1QFZ8			Q6PI52	calm1a zgc:63926; calm1b; calm2a calm2d; calm2b zgc:64036; calm3a calm2g zgc:86728; calm3b zgc:76987	Calmodulin (CaM)	A2BGR0	erap1b	Aminopeptidase (EC 3.4.11.-)	Q6P2V4	hgd	Hgd protein (Homogentisate 1,2-dioxygenase)
A0A0G2KI52			B0S6C1	tfpia	Tissue factor pathway inhibitor	Q5BLH5	capn2a	Calpain 2, (M/II) large subunit a	A2BGR2	map7d2a	MAP7 domain-containing 2a	Q1LXJ1	krt17 si:dkeyp-113d7.7	Keratin 17 (Si:dkeyp-113d7.7)
F1QU32			F1QKL1	thbs3a	Thrombospondin-3a	B7ZV15	capn2b	Calpain 2, (M/II) large subunit b	A2BGR9	aldh2.1	Aldehyde dehydrogenase 2 family member, tandem duplicate 1	Q6DC81	nutf2l nutf2	Nuclear transport factor 2 (Nuclear transport factor 2,-like)
A0A0G2KQU1	snta1	Uncharacterized protein	F1QSF1	mfap2	Microfibril-associated protein 2	Q6DFZ8	capn2l zgc:92480	Zgc:92480	A2BHA3	ckma	Creatine kinase, muscle a	Q8JJ15	beta globin	Beta globin (Fragment)
A0A0G2KJA5			F1R8M7			Q1LYC9	capns1a	Calpain, small subunit 1 a	A2BHD8	hexb hexa DKEY-35I22.2-001	Beta-hexosaminidase (EC 3.2.1.52)	B3DFP9	apoa2 zgc:193613	Apolipoprotein A-II (Zgc:193613)
A0A0G2KJC6			F1REI0	htra3b	Uncharacterized protein	B3DFQ1	capns1b	Calpain, small subunit 1 b (Capns1b protein)	A2BHM2	si:ch211-271e10.6	Si:ch211-271e10.6 (Fragment)	Q6NY48	serpinb5l	Serpin peptidase inhibitor, clade B (Ovalbumin), member 5, like
F1R4N7			F1R5V4	col4a3	Collagen, type IV, alpha 3	B3DHH0	cast zgc:194249	Zgc:194249 protein	A2BHN0	anxa3a	Annexin	Q6P5M2	wdr61 zgc:77675	WD repeat-containing protein 61
A0A0G2KJF1	clpxa	Caseinolytic mitochondrial matrix peptidase chaperone subunit a	F1QXD5	col10a1a	Collagen, type X, alpha 1a	Q7ZU64	capgb capg	Capg protein (Fragment)	A2BIH6	lrrc8da	Leucine-rich repeat-containing 8 VRAC subunit Da	Q1LYC9	capns1a	Calpain, small subunit 1 a
A0A0G2KJM7	lima1a	LIM domain and actin-binding 1a	F1QBE9	ccl25b	Chemokine (C-C motif) ligand 25b	Q6NWK1	capza1a capza1	F-actin-capping protein subunit alpha	A2BIM7	tars	Threonyl-tRNA synthetase	Q9PVK4	ldhba ldhb si:dkey-13i19.5	L-lactate dehydrogenase B-A chain (LDH-B-A) (EC 1.1.1.27)
F1QRC9			E9QG22	spp2	Secreted phosphoprotein 2	Q6NWD6	capza1b si:dkey-16k6.1	F-actin-capping protein subunit alpha (Fragment)	A2BIN5	mccc2	Methylcrotonoyl-CoA carboxylase 2 (beta)	Q801W1	psmb13a psmb10 psmb10-001	Proteasome subunit beta (EC 3.4.25.1)
A0A0G2KK98	LOC103910015	Polypeptide N-acetylgalactosaminyltransferase (EC 2.4.1.-) (Protein-UDP acetylgalactosaminyltransferase)	F1QYN1	col4a6	Collagen, type IV, alpha 6	Q7SXP1	capzb	F-actin-capping protein subunit beta	A2BIN8	nos2a	Nitric oxide synthase (EC 1.14.13.39)	A4QP88	khsrp MGC163038	MGC163038 protein
A0A0G2KKE8		Uncharacterized protein	F1R1F1	col9a3	Collagen, type IX, alpha 3	Q9DF44	cbr1l	20 beta-hydroxysteroid dehydrogenase	A2BIP1	atp2a3	ATPase sarcoplasmic/endoplasmic reticulum Ca2+-transporting 3 (Fragment)	Q6NWF6	krt8 krt2-8	Keratin, type II cytoskeletal 8 (Cytokeratin-8) (CK-8) (Keratin-8) (K8)
A0A0G2KL60			Q1LXU2	col9a2	Procollagen, type IX, alpha 2	Q6NYM2	cbr1l	Cbr1l protein	A2BIQ7	zcchc8	Zinc finger, CCHC domain-containing 8 (Fragment)	Q7SXK0	c3a.1 c3a sb:cb26 si:dkey-76b14.4	Sb:cb26 protein (Fragment)
A0A0G2KL94			F1QGG9	gas6	Growth arrest-specific 6	Q1LVQ7	alx1 cart1 si:ch211-154h20.1 si:dkey-66c4.1	ALX homeobox protein 1 (Cartilage homeoprotein 1) (CART-1)	A2BIR5	ube2l3b ube2l3l	Ubiquitin-conjugating enzyme E2L 3b	Q6P972	tuba2	Tubulin alpha chain
A0A0G2KLA5	si:cabz01030277.1	Poly [ADP-ribose] polymerase (PARP) (EC 2.4.2.-)	F1QYU0	lama4	Laminin, alpha 4	Q6IQV0	zgc:86598	Zgc:86598	A2CE73	khdrbs1a	KH domain-containing, RNA-binding, signal transduction-associated 1a	Q1LXJ9	krtt1c19e	Keratin type 1 c19e
A0A0G2KLD8	bphl	Biphenyl hydrolase like	F1R2Z9	spon1b	Spondin 1b	Q9PVF8	ctnna1 ctnna	Catenin (Cadherin-associated protein), alpha (Catenin (cadherin-associated protein), alpha 1) (Cell-adhesion protein alphaE catenin)	A2CE76	upk3b upk3l	Uroplakin 3b	Q7SZQ6	arhgdig	Rho GDP dissociation inhibitor (GDI) gamma
A0A0G2KLM5		Uncharacterized protein	Q8QGV5	ptgdsb.1 ptgds ptgdsb	Lipocalin-type prostaglandin D synthase-like protein (Prostaglandin D2 synthase b, tandem duplicate 1) (Ptgds protein)	Q6YLH9	cav1 CAV1	Caveolin	A2CEM4	atl3	Atlastin 3	A7MBX1	capns1b	Capns1b protein
A0A0G2KLX0	rabgap1	RAB GTPase-activating protein 1	F1QPN2			A0JMK7	cd99 zgc:153928	Zgc:153928	A2CEW4	atic	5-aminoimidazole-4-carboxamide ribonucleotide formyltransferase/IMP cyclohydrolase	E7FE19	cnp	2',3'-cyclic nucleotide 3' phosphodiesterase
A0A0G2KMC2		Uncharacterized protein	F1QJG6	sfrp5	Secreted frizzled-related protein 5	Q5TZ37	cdc42bpab	Non-specific serine/threonine protein kinase (EC 2.7.11.1)	A2CEY7	si:dkey-251i10.2	Si:dkey-251i10.2	B8JKP3	tpmt.1	Thiopurine S-methyltransferase, tandem duplicate 1
A0A0G2KN09	si: ch211-223l2.4	Uncharacterized protein (Fragment)	F1QKW3	lama5	Laminin, alpha 5	Q7ZUQ1	cdc42l	Cdc42l protein (Cell division cycle 42,-like) (Ras-like protein Cdc42c)	A2CF32	glipr2	GLI pathogenesis-related 2	Q6GMI7	enoph1 masa zgc:91991	Enolase-phosphatase E1 (EC 3.1.3.77) (2,3-diketo-5-methylthio-1-phosphopentane phosphatase) (MASA homolog)
A0A0G2KN47	znf1124	Zinc finger protein 1124	F1QY29	prelp	Proline/arginine-rich end leucine-rich repeat protein	Q6P123	cct4	T-complex protein 1 subunit delta	A2CF42	lrsam1	Leucine-rich repeat and sterile alpha motif-containing 1	Q5XJU1	zgc:101569	Zgc:101569
A0A0G2KN51	LOC110438480	Uncharacterized protein	Q5RI33	ccn2a ctgf ctgfa CH211-193L17.2-001	Connective tissue growth factor (Connective tissue growth factor a) (Ctgfa) (Novel protein similar to vertebrate connective tissue growth factor (CTGF))	Q7ZVY5	cs zgc:55507	Citrate synthase, mitochondrial (EC 2.3.3.1) (Citrate (Si)-synthase)	A2CF49	ptpa ppp2r4	Serine/threonine-protein phosphatase 2A activator (EC 5.2.1.8) (Phosphotyrosyl phosphatase activator)	Q7T3A8	anxa1a	Annexin
H9GYT6	ate1	Uncharacterized protein	Q1LVF0	lamc1	Laminin subunit gamma-1	B3DK43	cltca	Clathrin heavy chain	A2CG95	acadm	Acyl-CoA dehydrogenase medium chain	Q7ZUM5	hspa4b hspa4	Heat shock protein 4
A0A0G2KNY9	pin1	Peptidyl-prolyl cis-trans isomerase (EC 5.2.1.8)	A2CEW3	fn1b	Fibronectin 1b	Q6TNV3	cndp2 CN2	Cytosolic nonspecific dipeptidase	A2RRT1	mfge8b mfge8	Milk fat globule-EGF factor 8 protein (Milk fat globule-EGF factor 8 protein b)
A0A0G2KP17			F1RE78			Q6PFT7	cotl1 COTL1	Coactosin-like 1 (Coactosin-like 1 (Dictyostelium)) (Coactosin-like F-actin-binding protein 1) (Cotl1 protein)	A2THY5	mtx1a	Metaxin 1a
A0A0G2KPJ7	rbms1b	RNA-binding motif, single stranded-interacting protein 1b	A1IGX5	fibin zgc:110676	Fin bud initiation factor	Q08CA3	f13a1b f13a1	Coagulation factor XIII, A1 polypeptide (F13a1 protein)	A3KGZ5	vps37b si:dkey-21k4.4	Vacuolar protein sorting 37 homolog B (S. cerevisiae)
A0A0G2KPR3	atg7	ATG7 autophagy-related 7 homolog (S. cerevisiae)	Q6NWB6	ucma zgc:85838	Unique cartilage matrix-associated protein [Cleaved into: Unique cartilage matrix-associated protein C-terminal fragment (Ucma-C) (Gla-rich protein) (GRP)]	Q6JWU9	copa	Coatomer subunit alpha	A3KGZ6	ppp3cca ppp3cc	Serine/threonine-protein phosphatase (EC 3.1.3.16) (Fragment)
A0A0G2KQ27	tox4b	TOX high mobility group box family member 4 b (Fragment)	F1R9X9			Q7ZWD8	cfl1l CFL1 cfl1	Cfl1 protein (Cofilin 1 (non-muscle),-like) (Non-muscle cofilin 1)	A3KMS9	prkacaa zgc:158799	Protein kinase, cAMP-dependent, catalytic, alpha, genome duplicate a (Zgc:158799 protein)
A0A0G2KQ62	fbn2b	Fibrillin 2b	A3KQQ9	scg3 si:ch211-12a1.3 zgc:73236	Secretogranin-3 (Secretogranin III) (SgIII)	Q6TH32	cfl1 CFL2 cfl2l	Cofilin 1 (Muscle cofilin 2)	A3KNM2	tpd52 si:ch211-203l9.2 si:ch211-203l9.3	Si:ch211-203l9.2 (Tumor protein D52)
A0A0G2KQA6	sept4b	Uncharacterized protein	Q9W6E0	frzb fzb1	Frizzled-related protein (Fzb-1)	Q566W6	cirbpa zgc:112425	Cold-inducible RNA-binding protein a (Zgc:112425) (Zgc:112425 protein)	A3KP47	zgc:162941	Lysozyme g (EC 3.2.1.17)
A0A0G2KQH0			Q6AXL0	cthrc1a	Collagen triple helix repeat containing 1a	Q6IQX2	col1a2	Collagen, type I, alpha 2	A3KPG5	crp2 crp3 si:ch211-234p6.12	Pentaxin (Pentraxin)
A0A0G2KQV4			E7FDM6			Q90YI9	col1a1b col1A3 col1a3	Collagen type I alpha 3 chain (Fragment)	A3KPH5	crp7	Pentaxin (Pentraxin)
A0A0G2KR57		NADH:ubiquinone oxidoreductase complex assembly factor 3	F1REI7			A3KNX1	col6a2	Col6a2 protein (Fragment)	A3KPH8	crp2	Pentaxin (Pentraxin)
A0A0G2KR69	efs	Embryonal Fyn-associated substrate	Q29RB4	olfml3a olfml3 zgc:153815	Olfactomedin-like protein 3A	Q7ZWI2	cpne1	Copine I (Cpne1 protein)	A3KPI6	si:ch211-288g17.3	Si:ch211-288g17.3
F1QA74	pts	6-pyruvoyltetrahydropterin synthase	E7FE90	fetub	Fetuin B	Q7ZW06	coro1ca	Coronin-1C-A	A3KPN4	ptx3a	Pentraxin 3, long a
A0A0G2KSF3	LOC103911589	Uncharacterized protein	F1R774	pcolce2b	Procollagen C-endopeptidase enhancer 2b	Q8AY63	ckbb ckb	Brain-subtype creatine kinase (Creatine kinase, brain b)	A3KPP9	exoc1	Exocyst complex component 1
A0A0G2KSM8	bloc1s5 zgc:113385	Biogenesis of lysosome-related organelles complex 1 subunit 5 (BLOC-1 subunit 5) (Protein Muted homolog)	A1L1V4	loxl2b si:dkeyp-32b1.1 zgc:158414	Lysyl oxidase homolog 2B (EC 1.4.3.13) (Lysyl oxidase-like protein 2B)	Q1L927	crb1	Crumbs cell polarity complex component 1	A3KPR3	histh1l	Histone H1-like
A0A0G2KSN1	gldc	Glycine dehydrogenase (decarboxylating)	E7F301	f9a	Coagulation factor IXa	Q6DHU3	krt97 zgc:92061	Keratin 97 (Zgc:92061)	A3KPX2	abcf1	ATP-binding cassette, sub-family F (GCN20), member 1
A0A0G2KSU4	znf609b	Zinc finger protein 609b	Q1RLV2	f9b zgc:136807	Coagulation factor IXb (Zgc:136807)	Q5CZW1	dspa	Dspa protein (Fragment)	A3KPZ2	cratb DKEY-63J1.1-001	Carnitine O-acetyltransferase b (Novel protein similar to vertebrate carnitine acetyltransferase (CRAT))
A0A0G2KSV9		Uncharacterized protein	B8JKW4	c3a.1 si:dkey-76b14.4	Complement component c3a, duplicate 1	Q1LVD7	efhd2 si:dkey-72l14.9	EF-hand domain family, member D2 (Si:dkey-72l14.9) (Si:dkey-72l14.9 protein)	A3KPZ9	si:ch211-152p11.4 CH211-152P11.4-001	Novel protein similar to vertebrate regulator of G-protein signalling family (Si:ch211-152p11.4)
A0A0G2KT66	LOC100537556	Uncharacterized protein	F1QX13	c3a.3 c3c	Complement component c3a, duplicate 3	Q6P3J7	ehd2b ehd2	EH-domain containing 2 (EH-domain-containing 2b)	A3KQ59	usp39	Ubiquitin-specific peptidase 39
A0A0G2KT98	si:ch73-236c18.9	Si:ch73-236c18.9	F1QDL1	col1a1b	Collagen, type I, alpha 1b	Q7ZTS8	elavl1a elavl1	ELAV-like protein	A3KQI1	gtpbp1l	GTP-binding protein 1,-like
A0A0G2KTB7	c1s	Complement component 1, s subcomponent	F1QJC9	col1a1a	Collagen, type I, alpha 1a	Q6GQM6	elavl2 zgc:91918	ELAV-like protein	A3KQK2	asns	Asparagine synthetase
A0A0G2KTH3			F1QP85			Q7ZUS9	etfa ETFA	Electron transfer flavoprotein subunit alpha (Electron-transfer-flavoprotein, alpha polypeptide)	A3KQR0	acadl	Acyl-CoA dehydrogenase long chain
A0A0G2KTI4	slc12a2	Solute carrier family 12 member 2	Q2LDA1	col2a1a col2a1	Collagen type II, alpha 1 (Collagen, type II, alpha 1a)	Q6PC12	eno1a eno1	Enolase 1, (Alpha) (Enolase 1a, (alpha))	A3KQX1	cndp2	Carnosine dipeptidase 2
A0A0G2KTI7			O42364	apoeb apoe	Apolipoprotein Eb (Apo-Eb)	Q6TH14	eno3 ENO1	Enolase 1, (Alpha) (Enolase 3, (beta, muscle))	A3QJU3	coq8b adck4	Atypical kinase COQ8B, mitochondrial (EC 2.7.-.-) (AarF domain-containing protein kinase 4) (Coenzyme Q protein 8B)
A0A0G2KTR0	bin3 zgc:158415	Bridging integrator 3 (Zgc:158415 protein)	Q503V2	apoea zgc:110064	Apolipoprotein Ea (Zgc:110064)	Q58EJ3	evpla si:ch211-157f15.1	Si:ch211-157f15.1 protein (Fragment)	A4FUL3	rbx1	Rbx1 protein (Ring-box 1, E3 ubiquitin protein ligase)
A0A0G2KTT4	si:dkey-167k11.5 si:ch73-308m11.1	Si:ch73-308m11.1 (Si:dkey-167k11.5)	A8KC28	proca proc	Proc protein (Protein C (inactivator of coagulation factors Va and VIIIa), a)	B8JM11	epcam	Epithelial cell adhesion molecule	A4FUP0	sult2st3	Sulfotransferase (EC 2.8.2.-)
A0A0G2KTU9		Uncharacterized protein	B8JLG2	proca	Protein C (inactivator of coagulation factors Va and VIIIa), a	Q6P969	eef1a1a zgc:73138	Elongation factor 1-alpha	A4FVK4	rab8a	RAB8A, member RAS oncogene family (Rab8a protein)
A0A0G2KTX1			E7FE47	col5a2b	Collagen, type V, alpha 2b	Q4JIY5	eef1a1l1 ef1a	Elongation factor 1-alpha	A4IG09	ftr83 si:dkey-7b17.2	FinTRIM family, member 83 (Si:dkey-7b17.2 protein)
Q1LVZ9	aox6	Aldehyde oxidase 6	F1QJ71			Q7ZVM3	eef2b eef2l	Eukaryotic translation elongation factor 2, like	A4IG34	plin6 zgc:162150	Perilipin 6 (Zgc:162150 protein)
A0A0G2KUB6	wu:fj16a03	Wu:fj16a03	E7F2E3	meltf mfi2	Serotransferrin	Q6PC00	eef2l2 si:ch211-113n10.4	Si:ch211-113n10.4 protein (Fragment)	A4IGC8	aldh18a1	Delta-1-pyrroline-5-carboxylate synthase [Includes: Glutamate 5-kinase (GK) (EC 2.7.2.11) (Gamma-glutamyl kinase); Gamma-glutamyl phosphate reductase (GPR) (EC 1.2.1.41) (Glutamate-5-semialdehyde dehydrogenase) (Glutamyl-gamma-semialdehyde dehydrogenase)]
A0A0G2KUJ0	cct2	Chaperonin-containing TCP1, subunit 2 (beta)	F1QFL7	otomp	Otolith matrix protein 1	Q7ZV55	eif3i eif3s2	Eukaryotic translation initiation factor 3 subunit I (eIF3i) (Eukaryotic translation initiation factor 3 subunit 2) (eIF-3-beta) (eIF3 p36)	A4QNT9	stat5b stat5.2	Signal transducer and activator of transcription
A0A0G2KUL6	spint1a	Serine peptidase inhibitor, Kunitz type 1 a	F1QFP3	f7	Coagulation factor VII	Q802C9	eif4a1a	Eukaryotic translation initiation factor 4A, isoform 1A (Eukaryotic translation initiation factor 4A1A)	A4QP33	ppp2r5cb ppp2r5c si:dkey-241l7.9	Serine/threonine protein phosphatase 2A regulatory subunit
A0A0G2KXK5	rbm5	RNA-binding motif protein 5 (Rbm5 protein)	F1QUI0			Q6NX89	eif5a	Eukaryotic translation initiation factor 5A (eIF-5A)	A4QPA0	me3 im:7151680	Malic enzyme
A0A0G2KUN8			A2RUX5	col11a1a col11a1 zgc:158335	Collagen, type XI, alpha 1a (Zgc:158335 protein)	Q7ZUP4	eif5a2 zgc:77429	Eukaryotic translation initiation factor 5A (eIF-5A)	A4VAK4	hspb1 hsp1	Heat shock protein 1 (Heat shock protein, alpha-crystallin-related, 1)
A0A1D5NSM1	stard5	StAR-related lipid transfer (START) domain-containing 5 (Fragment)	D6MUD3	col11a1b COL11A1b	Collagen type XI alpha-1b (Collagen, type XI, alpha 1b)	Q7T251	fabp3	Heart-type fatty acid-binding protein (Fragment)	A4VCH0	sacm1la si:ch211-222e23.8	Phosphatidylinositide phosphatase SAC1-A (EC 3.1.3.-) (Suppressor of actin mutations 1-like protein A)
A0A0G2KW52		Uncharacterized protein	F1RAG3	nid1a	Nidogen 1a	B0BLX4	zgc:175088	Zgc:175088 (Zgc:175088 protein)	A5A4L9	supt16h	FACT complex large subunit (SPT16 homolog, facilitates chromatin-remodeling subunit) (Suppressor of Ty 16 homolog)
A0A0G2KWP7			F1Q5S2	proza	Protein Z, vitamin K-dependent plasma glycoprotein a	B8A5L6	fga	Fibrinogen alpha chain	A5D6S3	mut	Methylmalonyl CoA mutase (Mut protein)
A0A0G2KXD1			F1QZU6	prozb	Protein Z, vitamin K-dependent plasma glycoprotein b	A8E5P0	fgg	Fgg protein	A5PF48	myo1c si:ch211-69i14.4	Unconventional myosin-Ic (Myosin I beta) (MMI-beta) (MMIb)
A0A0G2KXI9	dnm2b	Dynamin 2b	F1R407			Q6ZM51	ficd si:ch211-191d15.5 zgc:110336	Protein adenylyltransferase FICD (EC 2.7.7.n1) (AMPylator FICD) (FIC domain-containing protein)	A5PF59	leg1.2	Liver-enriched gene 1, tandem duplicate 2
A0A0G2KXS7			E7F1S4	thbs2b	Thrombospondin 2b	Q7ZUE8	rpn1	Dolichyl-diphosphooligosaccharide--protein glycosyltransferase subunit 1	A5PF61	leg1a zgc:172246	Protein leg1a (Leg1-A) (Liver-enriched gene protein 1-A)
H9GXR0			E9QHD3			Q6IQ94	fkbp4	Peptidylprolyl isomerase (EC 5.2.1.8)	A5PL92	eif4ba eif4b	Eif4ba protein
A0A0G2KYP3		Uncharacterized protein	F1Q726			A7YE96	ttc30a flr	Tetratricopeptide repeat protein 30A (TPR repeat protein 30A) (Protein fleer)	A5PL98	sdhb	Succinate dehydrogenase [ubiquinone] iron-sulfur subunit, mitochondrial (EC 1.3.5.1) (Iron-sulfur subunit of complex II) (Ip)
A0A0G2KYR2	si: ch211-223l2.4	Uncharacterized protein	F1QG51	fmoda	Fibromodulin a	Q803S0	fah	Fumarylacetoacetase (EC 3.7.1.2) (Fumarylacetoacetate hydrolase)	A5PLC1	kdelc2 zgc:165521	KDEL (Lys-Asp-Glu-Leu)-containing 2 (Zgc:165521 protein)
A0A0G2KYZ5		Uncharacterized protein	B3DJG2	pcolceb LOC794872	Procollagen C-endopeptidase enhancer b (Similar to procollagen C-endopeptidase enhancer)	B0UYN4	zgc:162944	Zgc:162944	A5PLC6	bag1 si:dkey-216e9.4	BCL2-associated athanogene 1 (Si:dkey-216e9.4 protein)
A0A0G2KZ18	LOC100001114	Microtubule-associated protein	F1QUX0	pcolcea	Procollagen C-endopeptidase enhancer a	Q7ZVL9	gdi2	Rab GDP dissociation inhibitor	A5PLC8	ptmab zgc:165530	Prothymosin alpha-B
A0A0G2KZ26	smug1	Single-strand-selective monofunctional uracil-DNA glycosylase 1	A3KNP6	sfrp1b	Secreted frizzled-related protein 1b (Sfrp1b protein)	A0JMI5	gsna gsn	Gsna protein (Fragment)	A5PLJ7	oxsr1a	Oxidative stress-responsive kinase 1a (Oxsr1a protein)
A0A0G2KZ36	LOC103911241	Uncharacterized protein	Q7T2K9	sfrp1a sfrp1	Secreted frizzled-related protein 1 (Secreted frizzled-related protein 1a) (Sfrp1a)	A4IGC2	gsnb	Gsnb protein	A5PLK2	lhpp zgc:165670	Phospholysine phosphohistidine inorganic pyrophosphate phosphatase (EC 3.1.3.-) (EC 3.6.1.1)
A0A0G2KZ37			A9JRB3	htra1b zgc:172061	Serine protease HTRA1B (EC 3.4.21.-) (High-temperature requirement A serine peptidase 1B)	B0V1K4	zgc:136930	Zgc:136930	A5PMC3	pld7 si:dkeyp-110e4.6	Si:dkeyp-110e4.6
A0A0G2KZA4	pepd	Peptidase D	Q6GMI0	htra1a htra1 prss11 zgc:92029	Serine protease HTRA1A (EC 3.4.21.-) (High-temperature requirement A serine peptidase 1A) (Serine protease 11)	Q8QFU2	gpia pgi-1	Glucose-6-phosphate isomerase (EC 5.3.1.9)	A5PMF8	si:ch211-114l13.9	Si:ch211-114l13.9
A0A0G2KZE8	prpsap1	Phosphoribosyl pyrophosphate synthetase-associated protein 1	B5DC62	col12a1a col12a1	Collagen XII alpha-1 chain (Fragment)	Q6NZ29	glud1a	Glutamate dehydrogenase 1a	A5PMG4	ahcyl1 CH211-199O1.3-001	Adenosylhomocysteinase (EC 3.3.1.1)
F1QD15	ptgfrn	Uncharacterized protein	A5PMP6	c3b.1 c3b.2	Complement component c3b, tandem duplicate 1	Q6P3L9	glud1b	Glutamate dehydrogenase 1 (Glutamate dehydrogenase 1b)	A5PMI3	nsun2	NOP2/Sun RNA methyltransferase family, member 2
A0A0G2L033	oscp1b	Uncharacterized protein	A5WWD4	si:dkey-61l1.4	Si:dkey-61l1.4 (Fragment)	Q71E64	gria1b glur1b gria2a	AMPA receptor subunit GluR1B (Glutamate receptor, ionotropic, AMPA 1b)	A5PMJ7	stx12	Syntaxin 12
A0A0G2L6S5		Uncharacterized protein	B3DHC5	apoa4b.2 zgc:194131	Apolipoprotein A-IV b, tandem duplicate 2 (Zgc:194131)	B8JIS8	gstm.1 gstm	Glutathione S-transferase mu, tandem duplicate 1	A5PMN9	capn2b	Calpain 2, (m/II) large subunit b
A0A0G2L0J2	mthfs	5-formyltetrahydrofolate cyclo-ligase (EC 6.3.3.2)	E7F235			B8JIS5	gstm.3 gstm3	Glutathione S-transferase mu tandem duplicate 3	A5PMP1	capn1b si:dkeyp-101g1.3	Calpain 1, (mu/I) large subunit b
A0A0G2L0N2	lrrc1	Leucine-rich repeat-containing 1	E7FF99			Q9DDU5	gstp1	Glutathione S-transferase pi (Glutathione S-transferase pi 1) (Gstp1 protein) (Pi-class glutathione S-transferase)	A5PMP8	c3b.2	Complement component c3b, tandem duplicate 2
A0A0G2L0S9	eps15l1b	Uncharacterized protein	F1QXC6	tgfb5 tgfb2l	Transforming growth factor beta	Q5MJ86	gapdh-2 gapdh zgc:76908	Glyceraldehyde-3-phosphate dehydrogenase 2 (EC 1.2.1.12)	A5PMQ1	lta4h	Leukotriene A(4) hydrolase (LTA-4 hydrolase) (EC 3.3.2.6)
A0A0G2L0U4		Uncharacterized protein	F1R612	zgc:163025	Zgc:163025	Q7T3H5	gpd1c gpd1	Glycerol-3-phosphate dehydrogenase [NAD(+)] (EC 1.1.1.8)	A5PMS9	ap1b1	AP complex subunit beta
A0A0G2L1A2	l3hypdh	Trans-L-3-hydroxyproline dehydratase	F1R6B9			Q7T1E0	gpd1b gpd1h	Glycerol-3-phosphate dehydrogenase [NAD(+)] (EC 1.1.1.8)	A5PMV7	ppp2r1ba ppp2r1a	Protein phosphatase 2, regulatory subunit A, beta a
A0A0G2L1F5	sptbn1	Spectrin beta chain	Q1LUV0	si:ch211-262h13.5	Si:ch211-262h13.5	Q6P607	gnmt	Glycine N-methyltransferase (EC 2.1.1.20)	A5PMW9
A0A0G2L1H3	golim4a	Golgi integral membrane protein 4a	E7F3J6			Q6P696	glo1	Lactoylglutathione lyase (EC 4.4.1.5) (Glyoxalase I)	A5PMY0	st14a	Suppressor of tumorigenicity 14 protein homolog (EC 3.4.21.109) (Serine protease 14)
A0A0G2L1N0	si	Uncharacterized protein	A5WWJ4	matn1	Matrilin 1	A6QL59	hist1h2a6 zgc:165551	Histone H2A	A5PMY4	rpa3	Replication protein A3
A0A0G2L2I4	ccl36.1	C-C motif chemokine	F1QBB3			Q803H5	gnb1b gnb1l	Gnb1l protein (Guanine nucleotide binding protein (G protein), beta polypeptide 1, like) (Guanine nucleotide-binding protein (G protein), beta polypeptide 1b)	A5PMZ3	scinlb	Scinderin-like b
A0A0G2L2K5	scarb2b	Uncharacterized protein	F1Q924	col6a4a col6a6	Collagen, type VI, alpha 4a (Fragment)	Q6DGX8	psma1 zgc:92726	Proteasome subunit alpha type (EC 3.4.25.1)	A5PN03	edc4	Enhancer of mRNA-decapping protein 4
A0A0G2L2Q2	uqcr10	Ubiquinol-cytochrome c reductase, complex III subunit X	E7FB76	col21a1	Collagen, type XXI, alpha 1	Q6PI20	h3f3a zgc:56193 zgc:86731; h3f3b.1 zgc:110292; h3f3c zgc:64222; h3f3d zgc:56418	Histone H3.3	A5PN39	cryz	Crystallin, zeta (quinone reductase)
A0A0G2L2R7	mtr	Methionine synthase (EC 2.1.1.13) (5-methyltetrahydrofolate--homocysteine methyltransferase)	B0UXN0	qsox1 si:dkey-39n1.2	Sulfhydryl oxidase (EC 1.8.3.2)	Q803B0	hspd1	Heat shock 60 protein 1 (Heat shock 60kD protein 1 (Chaperonin)) (Hspd1 protein)	A5PN44	cds1 si:ch211-168m18.1	Phosphatidate cytidylyltransferase (EC 2.7.7.41) (Fragment)
A0A0G2L2S4	zgc:171572	Uncharacterized protein	F1Q7R2	chad	Chondroadherin	Q6PGX4	hsc70 zgc:63663	Heat shock cognate 70 (Zgc:63663)	A5PN55	me2 CH211-101J19.1-001	Malic enzyme
A0A0G2L2U8		Uncharacterized protein	B3DFV8	coch	Coagulation factor C homolog, cochlin (Limulus polyphemus)	Q5RJ15	si:ch211-250m6.4 DKEY-61P9.8-001	Novel protein similar to vertebrate heat shock 70kDa protein 12A (Hspa12a) (Si:ch211-250m6.4)	A5PN58	pxna pxn CH211-101J19.5-001	Paxillin (Fragment)
A0A0G2L2X4	ppfia1	Protein tyrosine phosphatase, receptor type, f polypeptide (PTPRF),-interacting protein (liprin), alpha 1	Q6T937	grem1a grem1	Gremlin	O42359	hsp70	Heat shock cognate 70 kDa protein (Fragment)	A5PN61
A0A0G2L325	rrp1	Ribosomal RNA-processing 1	E7F8X0	srpx2 si:ch73-137d5.1	Sushi-repeat-containing protein X-linked 2	Q90473	hspa8 hsc70	Heat shock cognate 71 kDa protein (Heat shock 70 kDa protein 8)	A5PN62	ddah2 si:dkey-46a12.1	Dimethylarginine dimethylaminohydrolase 2 (Si:dkey-46a12.1)
A0A0G2L365	LOC100329813	Uncharacterized protein	Q5RI43	kera	Keratocan	Q7SZD3	hspa5	Heat shock protein 5	A5WUM0	prkaa1 DKEY-226M8.8-001	Non-specific serine/threonine protein kinase (EC 2.7.11.1)
A0A0G2L3G6	LOC101885083	Uncharacterized protein	F1Q775	cilp	Cartilage intermediate layer protein, nucleotide pyrophosphohydrolase	O57521	hsp90ab1 hsp90b	Heat shock protein HSP 90-beta	A5WUN5	abr si:ch211-253h3.1	ABR, RhoGEF and GTPase-activating protein
A0A0G2L3P9		Uncharacterized protein	F1QK57	tecta	Tectorin alpha	Q7T3L3	hsp90b1 GP96 tra1	Chaperone protein GP96 (Heat shock protein 90, beta (Grp94), member 1)	A5WUQ7	apobb.2 si:dkeyp-88f5.1	Apolipoprotein Bb, tandem duplicate 2
A0A0G2L3S1	si:ch211-182d3.1	Si:ch211-182d3.1	Q1L8P0	crtap	Cartilage-associated protein	Q5RG12	hsp90aa1.2 hsp90a.2	Heat shock protein 90, alpha (cytosolic), class A member 1, tandem duplicate 2 (Heat shock protein 90-alpha 2)	A5WUT4	zgc:103438	Zgc:103438 (Fragment)
A0A0G2L3U3	nacc1a	Nucleus accumbens-associated 1, BEN and BTB (POZ) domain-containing a	B0S5K4			Q6ZM17	si:ch211-5k11.8 OTTDARP00000002008 si:xx-by187g17.1 bY187G17.1-001	Novel protein similar to zebrafish hemoglobin alpha-adult 1 (Hbaa1) (Si:ch211-5k11.8) (Si:xx-by187g17.1)	A5WUY4	smarca1 si:dkey-148b12.1	SWI/SNF-related, matrix-associated, actin-dependent regulator of chromatin, subfamily a, member 1
A0A0G2L4I2			F1QFH8	apom	Apolipoprotein M (Fragment)	Q7T1B0	hbbe2	Embryonic globin beta e2 (Hemoglobin beta embryonic-2)	A5WUY5	krt99 DKEY-90G20.1 DKEY-90G20.1-001	Keratin 99 (Novel keratin protein (Zgc:110712))
A0A0G2L559		Uncharacterized protein	Q5NJJ5	matn4	Matrilin-4	Q6PHG2	hpx	Hemopexin	A5WV02	pleca si:dkey-151c10.1	Plectin a
E7F3K6			F1RER1			Q6NYU8	hnrnpaba hnrnpab hnrpab	Heterogeneous nuclear ribonucleoprotein A/B (Heterogeneous nuclear ribonucleoprotein A/Ba)	A5WV16	acsl4b	Acyl-CoA synthetase long chain family member 4b
A0A0G2L5E3		Uncharacterized protein	Q1LYJ7	kng1	Kininogen 1	Q6PHJ4	hnrnpa0b hnrnpa0 hnrpa0	Hnrpa0 protein (Fragment)	A5WVI9	dnaja2b dnaja2l	DnaJ heat shock protein family (Hsp40) member A2b
A0A0G2L5F9	cfi	Uncharacterized protein	B3DFP9	apoa2 zgc:193613	Apolipoprotein A-II (Zgc:193613)	Q7ZU48	hnrnpa0l hnrpa0l	Heterogeneous nuclear ribonucleoprotein A0,-like (Hnrpa0l protein)	A5WVN8	si:dkey-238o13.4	Si:dkey-238o13.4
A0A0G2L5J6	LOC568664	Uncharacterized protein	F1R6R2	si:ch211-270n8.1	Si:ch211-270n8.1 (Fragment)	Q7SXN2	hnrnpdl hnrpdl	Heterogeneous nuclear ribonucleoprotein D-like	A5WVQ0	nat10 NAT10	RNA cytidine acetyltransferase (EC 2.3.1.-) (18S rRNA cytosine acetyltransferase)
A0A0G2L5W0	zgc:110283	Annexin	F1QI63			Q6NW53	hnrnph1l zgc:85960	Zgc:85960 protein	A5WVQ1	caprin1b	Cell cycle-associated protein 1b
A0A0G2L5X9	nansb	N-acetylneuraminic acid synthase b	F1QRB8	serpine1 PAI PAI-1 PAI1 PLANH1	Plasminogen activator inhibitor 1 (Serpin peptidase inhibitor, clade E (nexin, plasminogen activator inhibitor type 1), member 1)	Q7ZW09	hnrnpl hnrpl zgc:55429	Heterogeneous nuclear ribonucleoprotein L (Zgc:55429) (Zgc:55429 protein)	A5WVS7	ing5a LOC792168	Inhibitor of growth protein
A0A0G2L612			F1Q5B5	alpl alp	Alkaline phosphatase (EC 3.1.3.1)	P62805	HIST1H4A H4/A H4FA; HIST1H4B H4/I H4FI; HIST1H4C H4/G H4FG; HIST1H4D H4/B H4FB; HIST1H4E H4/J H4FJ; HIST1H4F H4/C H4FC; HIST1H4H H4/H H4FH; HIST1H4I H4/M H4FM; HIST1H4J H4/E H4FE; HIST1H4K H4/D H4FD; HIST1H4L H4/K H4FK; HIST2H4A H4/N H4F2 H4FN HIST2H4; HIST2H4B H4/O H4FO; HIST4H4	Histone H4	A5WVU0	tbl1xr1b tbl1xr1	Transducin (beta)-like 1 X-linked receptor 1b
A0A0G2L644	pdlim7	PDZ and LIM domain protein 7	E7EYJ8	clec3ba	C-type lectin domain family 3, member Ba	Q7SXU7	ddx39b bat1 CH211-152P11.1-001	DEAD (Asp-Glu-Ala-Asp) box polypeptide 39B (HLA-B associated transcript 1)	A5WVW9
B6IDE1			Q7ZVL5	serpine2	Serine (Or cysteine) proteinase inhibitor, clade E (Nexin, plasminogen activator inhibitor type 1), member 2 (Serpin peptidase inhibitor, clade E (nexin, plasminogen activator inhibitor type 1), member 2) (Serpine2 protein)	Q1LXJ1	krt17 si:dkeyp-113d7.7	Keratin 17 (Si:dkeyp-113d7.7)	A5WVX0	itpa si:ch73-18j6.1 si:dkey-19f21.1	Inosine triphosphate pyrophosphatase (ITPase) (Inosine triphosphatase) (EC 3.6.1.9) (Non-canonical purine NTP pyrophosphatase) (Non-standard purine NTP pyrophosphatase) (Nucleoside-triphosphate diphosphatase) (Nucleoside-triphosphate pyrophosphatase) (NTPase)
A0A0G2L6I6			A8E5G1	anxa2b	Annexin	A2BG19	actc1c DKEYP-69D2.1 DKEYP-69D2.1-001	Novel protein similar to vertebrate skeletal alpha-actin 1 (ACTA1, zgc:86725)	A5WVY7
A0A0G2L6T1	etfa ETFA	Electron transfer flavoprotein subunit alpha (Electron-transfer-flavoprotein, alpha polypeptide)	F1REP9			A3KP36	cavin1b ptrf ptrfb	Caveolae-associated protein 1b (Ptrf protein)	A5WWD9	noxa1	NADPH oxidase activator 1
A0A0G2L6W9	gng10	Guanine nucleotide-binding protein subunit gamma	Q5RI45	dcn	Decorin (Bone proteoglycan II)	Q6P040	ppa2 zgc:77715	Zgc:77715	A5WWE7
A0A0G2L792	LOC100333521	Uncharacterized protein	B8JKE9			Q5U3E4	sugt1 sgut1 zgc:103668	SGT1 homolog, MIS12 kinetochore complex assembly cochaperone (Zgc:103668) (Zgc:103668 protein)	A5WWG5	srsf3b	Serine and arginine-rich-splicing factor 3b
A0A0G2L833	lyar	Ly1 antibody reactive homolog (mouse)	F1RAP6	serpinf2b	Serpin peptidase inhibitor, clade F (alpha-2 antiplasmin, pigment epithelium-derived factor), member 2b	Q6XG62	icn	Protein S100 (S100 calcium-binding protein)	A5WWI5	ahsg2	Alpha-2-HS-glycoprotein 2
A0A140LFY0	nid1b	Nidogen 1b	Q6P0V8	anxa5b	Annexin	A3FKT8	icn2 Icn2	Protein S100 (S100 calcium-binding protein)	A5WWM0	vps4b	Vacuolar protein sorting 4b homolog B (S. cerevisiae)
A0A0G2L8H6	LOC100150619	Uncharacterized protein	F1Q9F4	spp1	Secreted phosphoprotein 1	B0CLY6	igdcc4 sc:d0658	cDNA, clone cssl:d0658	A6NA21	cavin1b ptrf ptrfb	Caveolae-associated protein 1b (Polymerase I and transcript release factor)
A0A0G2L8K5	gigyf1a im:7159406	GRB10-interacting GYF protein 1a	Q5SPR2	clu	Clusterin	Q5RG82	ivns1abpa si:dkeyp-11g8.1	Influenza virus NS1A-binding protein homolog A (NS1-BP homolog A) (NS1-binding protein homolog A)	A7E2H0	defbl1	Beta-defensin
A0A0G2L8Q1			F1Q6P3	col6a1	Collagen, type VI, alpha 1	Q5BLF7	itga6b zgc:113088	Zgc:113088	A7E2K1	tpm1 zgc:171719	Tropomyosin 1 (alpha) (Zgc:171719 protein)
A0A0G2L906			E7FCV8	col6a2	Collagen, type VI, alpha 2	Q1RLR3	krt93 zgc:136902	Keratin 93 (Zgc:136902)	A7E2K4	rplp2l	Ribosomal protein, large P2,-like (Rplp2l protein)
A0A0G2L969	ttc39b	Tetratricopeptide repeat domain 39B	B8JHU4	actn1	Actinin, alpha 1 (Actn1 isoform b)	B0UYB0	ift88	Intraflagellar transport 88 homolog	A7E2L8	lsm5 LSM5 zgc:171959	U6 snRNA-associated Sm-like protein LSm5
A0A0G2L974		Filamin B	F1REM3	bmp1a	Metalloendopeptidase (EC 3.4.24.-)	Q7ZUJ7	idh3a	Isocitrate dehydrogenase [NAD] subunit, mitochondrial	A7MBU9	cmbl zgc:171683	Carboxymethylenebutenolidase homolog (Pseudomonas) (Zgc:171683 protein)
A0A0G2L986	thbs1a	Thrombospondin 1a	F2Z4S3	tcn2 si:ch211-102c2.6	Transcobalamin II	Q3B7R1	kpnb1	Karyopherin (Importin) beta 1	A7MCF0	fip1l1b fip1l1 zgc:103421	FIP1-like 1b (S. cerevisiae) (Zgc:103421 protein)
A0A0G2L9C0		Uncharacterized protein	F1R9P5			Q1LXJ0			A7MCL7	cst14a.2 cst14a MGC174082	Cystatin 14a, tandem duplicate 2 (MGC174082 protein)
A0A0G2L9G1	arfgap1	ADP-ribosylation factor GTPase-activating protein 1	B0JZL7	enpp1 si:ch211-142e24.2	Ectonucleotide pyrophosphatase/phosphodiesterase 1 (Si:ch211-142e24.2 protein)	Q803Y5	krt15	Keratin 15 (Krt15 protein)	A7MCR1	uqcrfs1	Cytochrome b-c1 complex subunit Rieske, mitochondrial (EC 7.1.1.8)
A0A0G2L9K3	snx2	Sorting nexin 2	F1QYE2	tnc	Tenascin C	Q7ZTS4	krt18 dapk1	Keratin, type I cytoskeletal 18 (Cytokeratin-18) (CK-18) (Dorsal aorta proneprin kinesin-1) (DreK18) (Keratin-18) (K18)	A7YT47	hadhaa hadha	Hadha protein (Hydroxyacyl-CoA dehydrogenase trifunctional multienzyme complex subunit alpha a)
A0A0G2LAU9	gnaz	Uncharacterized protein	A8E7E4			Q9PV92	krt4	Type II basic cytokeratin	A7YT77	qdpra	Qdpra protein (Quinoid dihydropteridine reductase a)
F1QCJ6		Uncharacterized protein	F1R6G3	lum	Lumican (Fragment)	Q6P3K5	krt5	Krt5 protein	A7YY10	zgc:171772	Zgc:171772 (Zgc:171772 protein)
A0A0G2LB41			Q24JW2	lyz	Lysozyme	A8WGN0	krt8	Keratin 8	A8DZ56	si:rp71-1i20.2	Si:rp71-1i20.2
A0A0H2UJQ0	pimr94	Pim proto-oncogene, serine/threonine kinase,-related 94 (Fragment)	B0UYS1	b2m	Beta-2-microglobulin	Q05AP7	krt1-19d	Krt1-19d protein (Fragment)	A8DZ95	dpysl2b	Dihydropyrimidinase-like 2b
A0A0H2UKD2	celf2	CUGBP Elav-like family member 2	Q6NYT8	loxa lox	Lysyl oxidase (Lysyl oxidase a)	Q6PHE4	krt18b zgc:77517	Zgc:77517	A8DZD4	bnipl	BCL2-interacting protein-like
A0A0H2UKD8	myo1ca	Myosin Ic, paralog a	F1QLH9	nucb1	Nucleobindin 1	Q6NW56	khdrbs1a khdrbs1	KH domain containing, RNA binding, signal transduction associated 1 (KH domain-containing, RNA-binding, signal transduction-associated 1a)	A8DZE4	gpib	Glucose-6-phosphate isomerase (EC 5.3.1.9)
A0A0H2UKE1	tbc1d32	Protein broad-minded	Q1LXA7	aspn	Asporin	Q7ZW63	nuf2 cdca1 zgc:56708	Kinetochore protein Nuf2 (Cell division cycle-associated protein 1)	A8DZG2	srsf6b	Serine and arginine-rich-splicing factor 6b
A0A0H2UKE4	lyrm5a	LYR motif-containing protein 5A (Fragment)	F1Q593			Q803U5	ldhba ldhb si:dkey-13i19.5	L-lactate dehydrogenase B-A chain (LDH-B-A) (EC 1.1.1.27)	A8DZJ0	tbcb	Tubulin folding cofactor B
A0A0H2UKE9	cd99l2	CD99 antigen-like protein 2	Q29RF0	dpt DPT zgc:136613	Dermatopontin (Zgc:136613 protein)	Q90XD7	lmna	Nuclear lamin A	A8E4Z6	zgc:123103	Zgc:123103
A0A0H2UKF1			A2RRT1	mfge8b mfge8	Milk fat globule-EGF factor 8 protein (Milk fat globule-EGF factor 8 protein b)	Q9W6T5	lmnb2 lamin B2	Lamin B2	A8E526	rpl14	Ribosomal protein L14 (Rpl14 protein)
A0A0H2UKF2	aacs	Acetoacetyl-CoA synthetase	Q2PMI2	fstl1b	Follistatin-like 1b (Follistatin-like 2)	Q6NUU4	lamc1	Lamc1 protein	A8E5C1	serpina7 LOC564060	LOC564060 protein (Serpin peptidase inhibitor, clade A (alpha-1 antiproteinase, antitrypsin), member 7)
A0A0H2UKF9	calhm5.1 fam26e.1	Calcium homeostasis modulator protein 5	F1QIJ3	lamc2	Laminin, gamma 2	Q32PT4	lgals3b lgals3l	Galectin	A8E5F3	glod4	Glyoxalase domain-containing 4
A0A0H2UKG1	spag1a	Sperm-associated antigen 1A	E7F6D3			Q6TLH6	lgals9l3	Galectin	A8E5H4	golga7 zgc:86753	Golgin A7 (Zgc:86753)
A0A0H2UKI1	cul4a	Cullin 4A	F1QW52	habp2	Hyaluronan-binding protein 2	Q08BI0		Uncharacterized protein (Fragment)	A8E5I2	krt18b zgc:77517	Keratin 18b (Zgc:77517 protein)
A0A0H2UKU3	strn zgc:158357	Striatin, calmodulin-binding protein (Zgc:158357)	Q6NXA5	pon2 zgc:77556	Paraoxonase 2 (Zgc:77556)	Q7ZZT0	ldlra ldlr	Low density lipoprotein receptor (Low density lipoprotein receptor a)	A8E7C9	sec23ip	SEC23-interacting protein
A0A0H2UKK7	nup214	Nucleoporin 214	F1QHI8	pdgfrl	Platelet-derived growth factor receptor-like	A8BBA0	lum	Zgc:86661 (Fragment)	A8E7D4	cers5	Ceramide synthase 5
A0A0H2UKL4	lrp1aa	Low density lipoprotein receptor-related protein 1Aa	F1REW1			Q6P698	lcp1 pls2	Plastin-2 (L-plastin) (Lymphocyte cytosolic plastin 1)	A8E7G0	dhdhl	Dihydrodiol dehydrogenase (dimeric),-like
A0A0H2UKN4	utrn	Utrophin	F1R5K7	hspg2	Heparan sulfate proteoglycan 2	Q801E6	mdh1aa MDH1 mdh1a mdhA	Malate dehydrogenase (EC 1.1.1.37)	A8E7G6	prdx3	Peroxiredoxin 3
A0A0H2UKP2	col4a2	Collagen, type IV, alpha 2	F1R9Y1	col14a1a col14a1	Collagen, type XIV, alpha 1a	Q7T334	mdh2 zgc:64133	Malate dehydrogenase (EC 1.1.1.37)	A8E7G8	tm9sf3	Transmembrane 9 superfamily member
A0A0H2UKQ7			F1R5Z2	fndc1	Fibronectin type III domain-containing 1	Q68EK6	matn3a DKEY-23G12.4-001	Matn3a protein (Matrilin 3a) (Novel protein similar to vertebrate matrilin 3 (MATN3) (Zgc:101120))	A8E7I5	ttc36 si:rp71-52f21.2 zgc:103600	Tetratricopeptide repeat protein 36 (TPR repeat protein 36)
A0A140LFW9	vgll4b	Vestigial-like family member 4b (Fragment)	A7MCK2	hsd17b12b	Hsd17b12b protein (Hydroxysteroid (17-beta) dehydrogenase 12b)	Q7ZW04	mat1a	S-adenosylmethionine synthase (EC 2.5.1.6)	A8E7K4	pcyt1aa	Phosphate cytidylyltransferase 1, choline, alpha a
A0A0H2UKS3	akap8l	A kinase (PRKA) anchor protein 8-like (Fragment)	F1QTG2			Q7ZV22	mtap zgc:66012	S-methyl-5'-thioadenosine phosphorylase (EC 2.4.2.28) (5'-methylthioadenosine phosphorylase) (MTA phosphorylase) (MTAP) (MTAPase)	A8E7L1	anxa13l	Annexin
A0A0H2UKS5	zgc:174944	Zgc:174944	F1R074	agrn	Agrin	Q561S9	hist1h2a3 mid1ip1 zgc:110434 zgc:173652	Histone H2A	A8E7N8	psmb4	Proteasome subunit beta (EC 3.4.25.1)
A0A0H2UKT7	coro7	Coronin (Fragment)	F1Q9N5			Q05AL6	zgc:163069	ATP synthase subunit beta (EC 7.1.2.2) (Fragment)	A8E7R9	ftr43	FinTRIM family, member 43
A0A0H2UKW4	fam168a	Family with sequence similarity 168 member A	F1RCR9			Q7ZVK8	mapk3	Mitogen-activated protein kinase (EC 2.7.11.24)	A8E7S3	sdr16c5a	Short chain dehydrogenase/reductase family 16C, member 5a
A0A0H2UKW6	akap8l	A kinase (PRKA) anchor protein 8-like	B0UXR7	olfml2a	Olfactomedin-like 2A	Q6TNS5	MLC3SM zgc:153867	Myosin light chain alkali, smooth-muscle isoform (Zgc:153867) (Zgc:153867 protein)	A8KB74	ca5a ca5	Ca5 protein (Carbonic anhydrase Va)
F1Q8U6	epb41l3b	Erythrocyte membrane protein band 4.1-like 3b	A2CEN1	efemp2a	EGF-containing fibulin extracellular matrix protein 2a	Q561Q7	myh9a myh9l2	Myh9l2 protein (Fragment)	A8KB78	rps23 zgc:171710	Ribosomal protein S23 (Zgc:171710) (Zgc:171710 protein)
A0A0J9YIW7	zgc:112994	Zgc:112994 (Fragment)	E7EXE8	tnxba si:dkey-8k3.1 tnxb	Tenascin XBa	Q4U0S2	myh11a myh11	Smooth muscle myosin heavy chain	A8KBJ5	zgc:173552	Histone H3
A0A0J9YJ03	pcbp4	Poly(rC)-binding protein 4 (Fragment)	F1R2W1	dhrs13a.3 dhrs13	Dehydrogenase/reductase (SDR family) member 13a, duplicate 3	Q5XJ62	myl6 zgc:103624	Myosin, light chain 6, alkali, smooth muscle and non-muscle (Zgc:103624)	A8KBR8	gstm.2 zgc:173994	Glutathione S-transferase mu tandem duplicate 2 (Zgc:173994 protein)
Q5RG05	ppfibp1a si:dkey-207j16.2	PTPRF-interacting protein,-binding protein 1a (liprin beta 1)	F1Q5C3			O93409	mylpfa mlc2f mylz2	Mylz2 protein (Myosin light chain 2) (Myosin light chain, phosphorylatable, fast skeletal muscle a) (Myosin, light polypeptide 2, skeletal muscle)	A8KC02	cbr1l LOC792137	Carbonyl reductase 1-like (LOC792137 protein)
F1R4Z8	gsta.1 gstal	Glutathione S-transferase, alpha tandem duplicate 1	B7SDQ7	ccdc80	CL2 (Coiled-coil domain containing 80)	Q6PHJ8	myl12.1 myl9l	Myosin, light chain 12, genome duplicate 1 (Myosin, light polypeptide 9, like)	A8KC22	hnrnpl2 hnrnpl	Heterogeneous nuclear ribonucleoprotein L2 (Hnrnpl protein)
A0A0J9YJ98	smdt1b	Single-pass membrane protein with aspartate-rich tail 1b	E7FDK4	podn	Podocan	Q800G8	mxb	Interferon-induced GTP-binding protein MxB (IFN-inducible antiviral protein MxB) (Interferon-inducible MxB protein)	A8KC30	psmc1a	Proteasome (Prosome, macropain) 26S subunit, ATPase, 1a (Proteasome 26S subunit, ATPase 1a)
B7ZVC4	ppfibp1b si:dkey-103i16.1	PTPRF-interacting protein,-binding protein 1b (liprin beta 1) (Si:dkey-103i16.1 protein)	F1Q5N7	cilp2 si:ch211-212d10.4	Cartilage intermediate layer protein 2	Q8JIU7	naca	Nascent polypeptide-associated complex subunit alpha (NAC-alpha) (Alpha-NAC)	A8WFT4	scly zgc:171514	Selenocysteine lyase (Zgc:171514 protein)
A0A0J9YJJ8	trim25	Tripartite motif-containing 25 (Fragment)	F1Q701			B4F6Q5	pof1b si:dkeyp-8h9.2 wu:fc88b11	Wu:fc88b11 protein (Fragment)	A8WFU6	serpinh1a zgc:171630	Serpin peptidase inhibitor, clade H (heat shock protein 47), member 1a (Zgc:171630 protein)
A0A0J9YJL0	abcg2a	ATP-binding cassette, sub-family G (WHITE), member 2a (Fragment)	F1R0N0	lrrc17	Leucine-rich repeat-containing 17	Q9IAD3	nme2b.1 nme2	Nucleoside diphosphate kinase (EC 2.7.4.6)	A8WGB4	soul4 LOC558832	LOC558832 protein (Fragment)
A0A0J9YJL9	ampd2a	AMP deaminase (EC 3.5.4.6)	F1RA81			A1L1Z5	nccrp1 si:dkey-85K8.6 wu:fa93e02 wu:fb12f07 zgc:122987	F-box only protein 50 (NCC receptor protein 1) (NCCRP-1) (Non-specific cytotoxic cell receptor protein 1)	A8WGM1	vapal	VAMP (vesicle-associated membrane protein)-associated protein A,-like
A0A0J9YJN2	dcun1d5	DCN1-like protein (Defective in cullin neddylation protein 1-like protein) (Fragment)	E7F8L7			B0S781			A8WGP7	ugdh	UDP-glucose 6-dehydrogenase (EC 1.1.1.22)
A8DZI0			F1QPX0	ndnf	Neuron-derived neurotrophic factor	B8A6E4			A8WHU6	scel	Sciellin
F1R2H0	nup58 nupl1	Nucleoporin 58	C1IHU8	itln1 INTL1	Intelectin 1	A3QJX1	kcnk10a TREK-2A	Potassium channel protein TREK2A (Potassium channel, subfamily K, member 10a)	A8WI00	stam2	Signal transducing adaptor molecule (SH3 domain and ITAM motif) 2
A0A0M3HEN9			Q6NYR4	hspa8	Heat shock cognate 71 kDa protein (Heat shock protein 8)	B8JIP1			A8WIP2	mecp2	Methyl-CpG-binding protein 2 (MeCp-2 protein) (MeCp2)
F1QWL2	caska cask	Calcium/calmodulin-dependent serine protein kinase a (Fragment)	B0S5X0	epyc	Epiphycan	Q5RIG3	ncoa1	Nuclear receptor coactivator 1	A8WIP9	satb2	DNA-binding protein SATB (Special AT-rich sequence-binding protein)
E9QCD7	si:ch73-142c19.1	Si:ch73-142c19.1	Q5F0G5	myoc	Myocilin	Q9PTF3	nme3 NDPK-Z3 ndpkz3	Nucleoside diphosphate kinase (EC 2.7.4.6)	A8Y5U1	si:dkey-46a10.3 wu:fd42g01	UPF0600 protein C5orf51 homolog
A0A0N4STU5	cobll1b	Cordon-bleu WH2 repeat protein-like 1b	A0JML7	adpgk	ADP-dependent glucokinase	A5JEM4	ndel1a	Nuclear distribution protein nudE-like 1-A (NudE-like protein 1a)	A9C3P0	mlec si:dkey-117k10.5	Malectin
A0A0N4STY4	ftr50	FinTRIM family, member 50	Q1LUC6	tinagl1 si:dkey-158b13.1	Tubulointerstitial nephritis antigen-like 1	A0JMC7	ocrl zgc:152864	Zgc:152864	A9C3Q7	amt	Aminomethyltransferase (EC 2.1.2.10) (Glycine cleavage system T protein)
A0A0N4SU18	zgc:123103	Zgc:123103 (Fragment)	Q1L8M3	fgf23	Fibroblast growth factor 23	Q1RM11	crp4 zgc:136586	Pentaxin (Pentraxin)	A9C3T0	prkar2aa	Protein kinase, cAMP-dependent, regulatory, type II, alpha A
F1R6J5	mhc1zja	MHC class I antigen ZJA transcript variant 1 (Major histocompatibility complex class I ZJA)	F1QFX6	ltbp3	Latent transforming growth factor beta binding protein 3	Q6TNR5	ppiaa ppia PPIA-2	Peptidyl-prolyl cis-trans isomerase (PPIase) (EC 5.2.1.8)	A9C462	cox6a1	Cytochrome c oxidase subunit 6A, mitochondrial (Cytochrome c oxidase polypeptide VIa)
A0A0N4SU38	cntrl	Centriolin	Q15JE7	optc	Opticin	Q6PC53	ppiab ppial	Peptidyl-prolyl cis-trans isomerase (PPIase) (EC 5.2.1.8)	A9C4A2	si:ch73-237c6.1	Si:ch73-237c6.1
A0A0N4SU43	si:ch211-271b14.1	Si:ch211-271b14.1	Q5RIH8	serpina10a	Serpin peptidase inhibitor, clade A (alpha-1 antiproteinase, antitrypsin), member 10a	Q75U66	postnb PN postn	Periostin (Periostin, osteoblast specific factor) (Periostin, osteoblast-specific factor b)	A9JR96	wdr43 wdr43l	WD repeat domain 43
A5PMP6	c3b.1 c3b.2	Complement component c3b, tandem duplicate 1	E7F6W5			Q5CZP6	ppl im:7140067	Ppl protein (Fragment)	A9JRC7	ppp4cb zgc:172126	Serine/threonine-protein phosphatase 4 catalytic subunit B (PP4C-B) (EC 3.1.3.16)
A0A0N4SU68	smyhc2 smyhc3	Slow myosin heavy chain 3	Q6AZC0	zgc:92041	Zgc:92041 (Zgc:92041 protein)	Q5BJJ3	prdx1 zgc:110343	Zgc:110343 protein	A9JRE2	mri1 zgc:172216	Methylthioribose-1-phosphate isomerase (M1Pi) (MTR-1-P isomerase) (EC 5.3.1.23) (S-methyl-5-thioribose-1-phosphate isomerase) (Translation initiation factor eIF-2B subunit alpha/beta/delta-like protein)
F1QGH7			B0S6K5	tnn tnw DKEY-4I23.1-001	Tenascin N (Tenascin W)	Q6DGJ6	prdx2 prdx1	Peroxiredoxin 2	A9JRP1	rab42b zgc:112009	RAB42, member RAS oncogene family (Zgc:112009 protein)
A0A0N4SUC0	abcc3	ATP-binding cassette, sub-family C (CFTR/MRP), member 3	Q803H7	itm2ba itm2b	Integral membrane protein 2Ba (Itm2ba protein)	Q502C8	prdx5	Peroxiredoxin (EC 1.11.1.15)	A9JRP8	zgc:86896	Actin-related protein 2/3 complex subunit
Q561U0	capn2l	Calpain 2, (M/II) large subunit, like	F1RDU8	si:dkey-65b12.6	Si:dkey-65b12.6	Q7ZV29	pgk1	Phosphoglycerate kinase (EC 2.7.2.3)	A9JRU2	pdp1 zgc:174908	Pyruvate dehyrogenase phosphatase catalytic subunit 1 (Zgc:174908 protein)
A0A0R4I9A0	apmap	Adipocyte plasma membrane-associated protein	F1Q4X1	col6a3	Collagen, type VI, alpha 3	Q6DG81	pls3	Plastin 3 (T isoform) (Pls3 protein)	A9JRX1	and2 zgc:175106	Actinodin2 (Zgc:175106 protein)
A0A0R4I9A3	bud31	Protein BUD31 homolog	F1QKE8	col6a3	Collagen, type VI, alpha 3 (Fragment)	Q2YDQ0	zgc:123292	Tubulin beta chain	A9JSZ7	zgc:174259	Zgc:174259 (Zgc:174259 protein)
A0A0R4I9A4	babam1	BRISC and BRCA1-A complex member 1	E7F537	acana	Aggrecan a	Q503P9	pleca si:dkey-151c10.1	Si:dkey-151c10.1 protein (Fragment)	A9JT06	eif4e1c zgc:110154	Eukaryotic translation initiation factor 4E family member 1c (Zgc:110154 protein)
A0A0R4I9A6	myd88	Myeloid differentiation primary response protein MyD88	F1R511	acanb	Aggrecan b	B0S564			A9JT16	pfdn5	Pfdn5 protein (Prefoldin 5)
F1QT75	rbb4l	Retinoblastoma-binding protein 4,-like	Q5NJJ7	matn3b	Matrilin-3b	Q7T1D8	phb	Phb (Phb protein) (Prohibitin)	A9JTB1	npl	Npl protein
A0A0R4I9B2	pafah1b1b LIS1 PAFAH1B1	Lissencephaly-1 homolog	Q68EK6	matn3a DKEY-23G12.4-001	Matn3a protein (Matrilin 3a) (Novel protein similar to vertebrate matrilin 3 (MATN3) (Zgc:101120))	A8WGP1	psmd13	Proteasome (Prosome, macropain) 26S subunit, non-ATPase, 13	A9JTC4	memo1	Mediator of cell motility 1 (Protein MEMO1)
A0A0R4I9G6			F1R7K7			A8E565	psmc4	Proteasome (Prosome, macropain) 26S subunit, ATPase, 4	A9JTC8	gnai3	Gnai3 protein (Guanine nucleotide-binding protein (G protein), alpha-inhibiting activity polypeptide 3)
A0A0R4I9C1	yars	Tyrosine--tRNA ligase (EC 6.1.1.1) (Tyrosyl-tRNA synthetase)	Q5RH53	angptl1a	Angiopoietin-like 1a	Q7ZWE5	psmd6	Proteasome (Prosome, macropain) 26S subunit, non-ATPase, 6	B0BLX4	zgc:175088	Zgc:175088 (Zgc:175088 protein)
A0A0R4I9C2	cpxm1a	Carboxypeptidase X (M14 family), member 1a	E7FBD3	apoba	Apolipoprotein Ba	B3DG31	si:rp71-45k5.4	Proteasome subunit alpha type (EC 3.4.25.1)	B0BLY0	exoc5 zgc:175220	Exocyst complex component 5 (Zgc:175220) (Zgc:175220 protein)
A0A0R4I9C3	rbm42	RNA-binding protein 42	Q5TZ29	apobb.1 apobl	Apolipoprotein Bb, tandem duplicate 1	Q7ZV77	psma4	Proteasome subunit alpha type (EC 3.4.25.1)	B0R028	psmb5 psmb5-001	Proteasome subunit beta (EC 3.4.25.1)
A0A0R4IGG3			E7FBW8	hapln1b	Hyaluronan and proteoglycan link protein 1b	Q6P0I2	psma8 zgc:77139	Proteasome subunit alpha type (EC 3.4.25.1)	B0R068	atp1a1b	Sodium/potassium-transporting ATPase subunit alpha
A0A0R4I9C6	ufm1	Ubiquitin-fold modifier 1	Q1LXE1	hapln1a	Hyaluronan and proteoglycan link protein 1a	Q6DRF3	psmb1	Proteasome subunit beta (EC 3.4.25.1)	B0R0D7	coro1ca	Coronin-1C-A
A2CET0	sympk si:dkeyp-117b8.1	Symplekin	E7F9A0			Q6DHI9	psmb2	Proteasome subunit beta (EC 3.4.25.1)	B0R0K4	prf1.6	Perforin 1.6
A0A0R4I9E8	p3h1	Prolyl 3-hydroxylase 1	F1QLW6	ognb	Osteoglycin, paralog b	Q568F3	psmb4	Proteasome subunit beta (EC 3.4.25.1)	B0R0K9	si:ch211-103n10.5	Si:ch211-103n10.5
A0A0R4I9F2	lgals3a lgals3	Galectin	Q1LV51	ogna ogn	Osteoglycin, paralog a	Q9PTH5	psme1	Proteasome activator subunit 1	B0R0M9	rps6ka3a	Ribosomal protein S6 kinase (EC 2.7.11.1)
A0A0R4I9F5	ddost	Dolichyl-diphosphooligosaccharide--protein glycosyltransferase 48 kDa subunit (Oligosaccharyl transferase 48 kDa subunit)	B8A4T6	col9a1b	Collagen, type IX, alpha 1b	Q9PUC4	psme2	Proteasome activator subunit 2	B0R137	sult1st1	Sulfotransferase (EC 2.8.2.-)
A0A0R4I9G0	mkrn2	Probable E3 ubiquitin-protein ligase makorin-2	F1QTQ2	col9a1a	Collagen, type IX, alpha 1a	Q7ZUJ8	psmb3	Proteasome subunit beta (EC 3.4.25.1)	B0R171	copb2	Coatomer subunit beta'
A0A0R4I9G1	plekha1b	Pleckstrin homology domain-containing, family A (phosphoinositide-binding-specific) member 1b	Q9DDG2	mdkb mdk2	Midkine b (Midkine-related growth factor Mdk2)	Q6TGV6	psma5 PSMA5	Proteasome subunit alpha type (EC 3.4.25.1)	B0R1B8	neflb nefl	Neurofilament, light polypeptide b
A0A0R4I9G5	coq8a adck3	Atypical kinase COQ8A, mitochondrial	Q9W767	mdka mdk1 plei1	Midkine a (Midkine-related growth factor) (Midkine-related growth factor Mdk1) (Pleiotrophin 1)	Q803D7	pdia3 sb:cb825	Protein disulfide-isomerase (EC 5.3.4.1) (Fragment)	B0R1D0	psmc4 CH211-265P12.8 CH211-265P12.8-001	Novel protein (Zgc:63709) (Proteasome 26S subunit, ATPase 4)
F1QCS8	wdr91	WD repeat-containing protein 91	F1QR30			Q6NY31	prkab1b prkab1	Protein kinase, AMP-activated, beta 1 non-catalytic subunit, b	B0R1F0	mgst1.1 mgst1	Microsomal glutathione S-transferase 1.1 (Fragment)
A0A0R4I9I4	mnta	MAX network transcriptional repressor a	Q6GMI5	bgna bgn	Biglycan	A5PMV7	ppp2r1ba ppp2r1a	Protein phosphatase 2, regulatory subunit A, beta a	B0S564
A0A0R4I9L8	si:dkey-31n13.4	Si:dkey-31n13.4	E7FCF1			Q568N9	ppa1b ppa1	Ppa1 protein (Pyrophosphatase (Inorganic) 1)	B0S5C4	acsl3b	Acyl-CoA synthetase long chain family member 3b
A0A0R4I9N0	purab	Purine-rich element-binding protein Ab	B8JL29	hmgb2a hmgb2	High mobility group box 2a	Q7T368	pdhb	Pyruvate dehydrogenase (Lipoamide) beta (Pyruvate dehydrogenase E1 beta subunit)	B0S5C5	acaa2	Acetyl-CoA acyltransferase 2
A0A0R4ICP2			Q66IB6	hmgb2b hmgb2 hmgb2l	High mobility group box 2b (High-mobility group box 2) (Hmgb2 protein)	Q6NXD1	pkma pkm2a	Pyruvate kinase (EC 2.7.1.40)	B0S5D9	tm9sf2	Transmembrane 9 superfamily member
A0A0R4I9P0			B7ZDA6	lamb2 hm:zehs0001	Laminin, beta 2 (laminin S)	Q6DG54	pkmb pkm2b	Pyruvate kinase (EC 2.7.1.40)	B0S5H0	ccdc22	Coiled-coil domain-containing protein 22
A0A0R4IQQ6	baz1b	Tyrosine-protein kinase BAZ1B	F1QKX8	lamb2l	Laminin, beta 2-like (Fragment)	Q7ZUW5	rab5aa rab5a	RAB5A, member RAS oncogene family (RAB5A, member RAS oncogene family, a) (Rab5a protein)	B0S5H7	si:ch211-229n2.7	Si:ch211-229n2.7
A0A0R4IH73			B8JLZ3	anxa1b	Annexin	P79735	ran	GTP-binding nuclear protein Ran (GTPase Ran) (Ras-related nuclear protein)	B0S5J9	impa1	Inositol-1-monophosphatase (EC 3.1.3.25) (Fragment)
A0A0R4I9Q1	pcyox1	Prenylcysteine oxidase 1	Q804H0	anxa1c	Annexin	Q6DGV5	rab10 zgc:92757	RAB10, member RAS oncogene family (Zgc:92757)	B0S5L3
Q1LWS2	hcls1 si:dkey-9a20.6	Hematopoietic cell-specific Lyn substrate 1	Q804H2	anxa1a	Annexin	Q6DI36	rab15 zgc:86635	RAB15, member RAS oncogene family (Zgc:86635)	B0S5L8	mcm3ap	Minichromosome maintenance complex component 3-associated protein
Q6NWD2	abraxas2 abraxas2b fam175b zgc:85800	Zgc:85800	E7F5I3	postna	Periostin, osteoblast-specific factor a	Q7ZUV5	rab1ba zgc:56049	ZRAB1B, member RAS oncogene family a (Zgc:56049) (Zgc:56049 protein)	B0S5M1	snx4	Sorting nexin 4 (Fragment)
F1QVJ2	naa15b	N(alpha)-acetyltransferase 15, NatA auxiliary subunit b (Fragment)	Q75U66	postnb PN postn	Periostin (Periostin, osteoblast specific factor) (Periostin, osteoblast-specific factor b)	Q9I9N6	pycard asc asc1	Apoptosis-associated speck-like protein containing a CARD (PYD and CARD domain-containing protein)	B0S5R8
A0A0R4I9S7	synrg	Synergin, gamma	F1Q8A0	ctsk	Cathepsin K	A4QP58	rfx1a zgc:162914	Zgc:162914 protein	B0S5S6	pdia5	Protein disulfide isomerase family A, member 5
A0A0R4IPF5	setd1ba	Histone-lysine N-methyltransferase SETD1B-A	F1QCP8	cts12 ctskl	Cathepsin 12	A7YY93	rexo1 si:dkey-45m5.5	Rexo1 protein (Fragment)	B0S5S9	acbd6	Acyl-CoA-binding domain-containing protein 6
A0A0R4I9Y1	rnf213b	E3 ubiquitin-protein ligase rnf213-beta (EC 2.3.2.27) (EC 3.6.4.-) (Mysterin-B) (Mysterin-beta) (RING finger protein 213-B) (RING finger protein 213-beta) (RING-type E3 ubiquitin transferase rnf213-beta)	E7F829	aebp1 si:dkey-24n17.4	AE-binding protein 1	Q802W6	arhgdia	Arhgdia protein (Rho GDP dissociation inhibitor (GDI) alpha)	B0S602	fn1a fn1	Fibronectin 1a
Q05AN2			F1RAC0	si:ch1073-459j12.1	Si:ch1073-459j12.1	Q7SZQ6	arhgdig	Rho GDP dissociation inhibitor (GDI) gamma	B0S642	hibch	3-hydroxyisobutyryl-CoA hydrolase, mitochondrial (EC 3.1.2.4) (3-hydroxyisobutyryl-coenzyme A hydrolase)
F1Q944	mpx	Myeloid-specific peroxidase	F1QMK5			Q1L907	gstr gstR1 gstr1 tfa	Glutathione S-transferase rho (Gstr1 protein) (Rho-class glutathione S-transferase)	B0S653	fam49ba	Family with sequence similarity 49 member Ba (Fragment)
A0A0R4IA19	ddx24	DEAD (Asp-Glu-Ala-Asp) box helicase 24 (Fragment)	F1REL9	lamb1b	Laminin, beta 1b	Q568Q2	zgc:110171	Zgc:110171	B0S6B1	cwc22	Pre-mRNA-splicing factor CWC22 homolog
A0A0R4IA20	nupr1a si:ch211-160e1.5	Nuclear protein 1a	F1QAL9			Q8AYB9	rpn1	Dolichyl-diphosphooligosaccharide--protein glycosyltransferase subunit 1	B0S6B5	zgc:153654	Zgc:153654
A0A0R4IA23	hibadha	3-hydroxyisobutyrate dehydrogenase (HIBADH) (EC 1.1.1.31)	F1QR06	emid1	EMI domain-containing 1 (Fragment)	Q7ZV07	rpn2	Ribophorin II	B0S6B9	nrd1a	Nardilysin a (N-arginine dibasic convertase)
A0A0R4IA30	eef1da	Eukaryotic translation elongation factor 1 delta a (guanine nucleotide exchange protein)	E7FG81	col12a1b si:ch211-106k22.1	Collagen, type XII, alpha 1b	Q5BKW5	rpl12	Ribosomal protein L12 (Rpl12 protein)	B0S6F6	mob3a	MOB kinase activator 3A
A0A0R4IA33	nots	Nothepsin	F1QLT3	fgfbp2b	Fibroblast growth factor-binding protein 2b	Q6DHS3	rpl15	Ribosomal protein L15	B0S6H4	plp2	Proteolipid protein 2
A0A0R4IA54			F1R8L1	fgfbp2a fgfbp2	Fibroblast growth factor-binding protein 2a	Q6DRM3	rpl9 rfc1	60S ribosomal protein L9 (Replication factor C (activator 1) 1) (Ribosomal protein L9)	B0S6K3	cacybp DKEY-4I23.2-001	Calcyclin-binding protein
Q7T306						Q6PC90	rps12	40S ribosomal protein S12	B0S6K7	renbp	Renin-binding protein
A0A0R4IA64	eef1da	Eukaryotic translation elongation factor 1 delta a (guanine nucleotide exchange protein)				Q1LWH1	rps16 si:dkey-66d18.1	Ribosomal protein S16 (Rps16 protein)	B0S6M2	ipo11	Importin 11
A0A0R4IA72	ryr3	Ryanodine receptor 3				Q6NWC3	rps2	Ribosomal protein S2	B0S6P6	ddx3xa ddx3 ddx3a	DEAD-box helicase 3 X-linked a
A0A0R4IA75	asrgl1	Isoaspartyl peptidase/L-asparaginase				Q7ZVD9	rps3	Ribosomal protein S3 (Rps3 protein)	B0S6R1	nckap1 si:dkey-234n3.1 wu:fd05c01	Nck-associated protein 1 (NAP 1)
A0A0R4IQI9	ckap5	Cytoskeleton-associated protein 5				Q642H9	rps4x rps4 zgc:92076	40S ribosomal protein S4, X isoform	B0S6V8	upp2	Uridine phosphorylase (EC 2.4.2.3)
A0A0R4IAA2						P62084	rps7 zgc:73216	40S ribosomal protein S7	B0S6Z1	dhx9 si:ch211-194i4.1	DEAH (Asp-Glu-Ala-His) box helicase 9
A0A0R4IAB0						Q803F6	rpsa lamr1	40S ribosomal protein SA (37 kDa laminin receptor precursor) (37LRP) (37/67 kDa laminin receptor) (LRP/LR) (67 kDa laminin receptor) (67LR) (Laminin receptor 1) (LamR) (Laminin-binding protein precursor p40) (LBP/p40)	B0S754	snrnp200 si:ch211-251j10.5	Small nuclear ribonucleoprotein 200 (U5)
Q5SNY2	papola papolb	Poly(A) polymerase alpha				A7E2K4	rplp2l	Ribosomal protein, large P2,-like (Rplp2l protein)	B0S784	zgc:101744	Receptor expression-enhancing protein
F1QHB8	wbp4	WW domain-binding protein 4				Q6P5K3	rplp0	60S acidic ribosomal protein P0	B0S7X3	tmco1	Calcium load-activated calcium channel (CLAC channel) (Transmembrane and coiled-coil domain-containing protein 1)
A0A0R4IAG9	cfhl5	Complement factor H-like 5 (Fragment)				Q6P5K5	rplp1	Ribosomal protein, large, P1	B0S8G3	col18a1a col18a1	Collagen type XVIII alpha 1 chain a
F1QRR4	hdac4	Histone deacetylase (EC 3.5.1.98)				Q6J0N1	rnf114 znf313	Ring finger protein 114 (ZFP313 protein)	B0S8J3	map3k19 ysk4	Mitogen-activated protein kinase kinase kinase 19 (Fragment)
Q803B5	dnpep zgc:55944	Aspartyl aminopeptidase (Zgc:55944)				Q7ZVA4	s100a10b	Protein S100 (S100 calcium-binding protein)	B0S8K3	lrrc15	Leucine-rich repeat-containing 15
A0A0R4IAH3	eci2	Enoyl-CoA delta isomerase 2				Q803T5	ahcy AHCY	Adenosylhomocysteinase (EC 3.3.1.1)	B0UXG8
Q1LUF1	camsap2a camsap1l1	Calmodulin-regulated spectrin-associated protein family, member 2a				Q504J8	scinla gsnl1	Scinla protein (Fragment)	B0UXL2	idh1	Isocitrate dehydrogenase [NADP] (EC 1.1.1.42)
F1QA29	virma si:ch211-79l20.4	Vir-like m6A methyltransferase-associated (Fragment)				Q6NYM6	scinlb	Scinderin like b	B0UXN0	qsox1 si:dkey-39n1.2	Sulfhydryl oxidase (EC 1.8.3.2)
A0A0R4IAK0						B7ZV53	dvl1b dvl2l LOC560032	LOC560032 protein	B0UXN4	fnbp1l	Formin-binding protein 1-like
Q803R3	ptpn2b ptpn2l	Tyrosine-protein phosphatase non-receptor type (EC 3.1.3.48)				Q5SPJ1	serpina1l	Serine (or cysteine) proteinase inhibitor, clade A (alpha-1 antiproteinase, antitrypsin), member 1,-like	B0UXP9	impdh2 si:dkey-90l2.2	Inosine-5'-monophosphate dehydrogenase 2 (IMP dehydrogenase 2) (IMPD 2) (IMPDH 2) (EC 1.1.1.205)
Q1L952						Q6P2U6	serpinb1l4	Serpin peptidase inhibitor, clade B (Ovalbumin), member 1, like 4	B0UXS4	si:dkeyp-69e1.8	Si:dkeyp-69e1.8
A0A0R4IAL5	tpm2	Tropomyosin 2 (beta)				Q6NY48	serpinb5l	Serpin peptidase inhibitor, clade B (Ovalbumin), member 5, like	B0UYA3	cryl1	Crystallin, lambda 1
A0A0R4IAN2	ago4 AGO4 EIF2C4	Protein argonaute-4 (Argonaute4) (Eukaryotic translation initiation factor 2C 4) (eIF-2C 4) (eIF2C 4)				A3KPG5	crp2 crp3 si:ch211-234p6.12	Pentaxin (Pentraxin)	B0UYB4	si:dkey-91i10.3	Si:dkey-91i10.3
A0A0R4IEK3	dlg1l	Discs large homolog 1-like protein				Q66HY0	cavin2b sdprb zgc:92231	Zgc:92231	B0UYD6	qars	Glutaminyl-tRNA synthetase
Q08BF2	slc27a1b zgc:153860	Solute carrier family 27 member 1b (Zgc:153860) (Zgc:153860 protein)				Q6DRC0	sars	Serine--tRNA ligase, cytoplasmic (EC 6.1.1.11) (Seryl-tRNA synthetase) (SerRS)	B0UYH4	fmodb si:dkey-31j12.4	Fibromodulin b
E9QGM4	nup98	Nucleoporin 98				Q8JHI0	slc25a5 SLC25A5	Solute carrier family 25 alpha, member 5 (Solute carrier family 25 member 5) (Solute carrier family 25 member 5 protein) (Solute carrier family 25, member 5)	B0UYH7	glmna	Glomulin, FKBP-associated protein a
A0A0R4IAR3	rab42b	RAB42, member RAS oncogene family				Q7ZT42	snd1 sn4tdr	Staphylococcal nuclease domain-containing protein 1 (100 kDa coactivator) (4SNc-Tudor domain protein) (p100 co-activator)	B0UYJ6	comta	Catechol O-methyltransferase A (Fragment)
A0A0R4IAR5						B7ZD09	slka slkn	STE20-like kinase a	B0UYK4	kif5ba	Kinesin-like protein (Fragment)
A0A0R4IAS2	ppl	Periplakin				B0S6Y5	DKEY-281A24.3-001	Novel protein similar to human and mouse stereocilin (STRC) (Fragment)	B0UYL4	esyt3	Extended synaptotagmin-like protein 3
Q6PHG0	gopc	Golgi-associated PDZ and coiled-coil motif-containing				Q7ZVU8	sulf2a sulf2	Extracellular sulfatase (EC 3.1.6.-)	B0UYL5	dhrs12	Dehydrogenase/reductase (SDR family) member 12
A0A0R4IAT5	col10a1b	Collagen, type X, alpha 1b				Q7T2V2	sult1st3	Cytosolic sulfotransferase 3 (EC 2.8.2.-) (SULT1 ST3)	B0UYM8	lmo7a	LIM domain 7a
F1R6G6	stim1b	Stromal interaction molecule 1b				A4FUP0	sult2st3	Sulfotransferase (EC 2.8.2.-)	B0UYN4	zgc:162944	Zgc:162944
A0A0R4IAU3	rfc4	Replication factor C (activator 1) 4				Q08C30	sult5a1 zgc:153723	Sulfotransferase (EC 2.8.2.-)	B0UYR8	krt98	Keratin 98
A0A0R4IAU8	heatr1	HEAT repeat-containing protein 1				O73872	sod1 cuzn	Superoxide dismutase [Cu-Zn] (EC 1.15.1.1)	B0UYS0	krt15	Keratin 15
A0A0R4IAV4	junbb	JunB proto-oncogene, AP-1 transcription factor subunit b				Q6NUZ3	syncrip	Synaptotagmin-binding, cytoplasmic RNA-interacting protein	B0V0X1	pccb	Propionyl-CoA carboxylase subunit beta
F1QWA6	zfyve19	Zinc finger, FYVE domain-containing 19				Q6PBW6	cct2	Chaperonin containing TCP1, subunit 2 (Beta)	B0V0Y6	exoc3	Exocyst complex component 3
Q29R83	dazap1	DAZ-associated protein 1 (Dazap1 protein) (Fragment)				A7MBY2	alyref zgc:171753	Zgc:171753 protein	B0V1I0	snrpd3 p2rx4b	Small nuclear ribonucleoprotein Sm D3 (Sm-D3) (snRNP core protein D3)
A0A0R4IAX2	si:dkey-17o15.2	Si:dkey-17o15.2				B0S746			B0V1K1	aimp1	Aminoacyl tRNA synthetase complex-interacting multifunctional protein 1
A0A0R4IAX3						Q6P6Y0	taldo1	Transaldolase (EC 2.2.1.2)	B0V1K4	zgc:136930	Zgc:136930
A0JMH5	dnajb14 zgc:153638	DnaJ heat shock protein family (Hsp40) member B14 (Zgc:153638)				Q66IB1	eloca tceb1a zgc:101879	Elongin C paralog a (Zgc:101879) (Zgc:101879 protein)	B0V1K6	prpf4ba	Pre-mRNA-processing factor 4Ba
A5WVX9	zdhhc17	Palmitoyltransferase (EC 2.3.1.225)				Q29RF1	si:ch211-195d17.2	Si:ch211-195d17.2 (Si:ch211-195d17.2 protein)	B0V1L8	dpp9	Dipeptidyl-peptidase 9
A0A0R4IZC7						B8JL43	tfa	Serotransferrin	B0V1T0	gpx1a	Glutathione peroxidase (Fragment)
A0A0R4IB07						Q7T2Q9	tktb tkt	Transketolase (EC 2.2.1.1)	B0V234	fhl2b	Four and a half LIM domains 2b
A0A0R4IB13	xrcc5	X-ray repair cross-complementing protein 5 (EC 3.6.4.-)				B8JHR1			B0V3D8	si:ch73-18b11.1	Si:ch73-18b11.1 (Fragment)
F1QNU7						Q567X5	krtt1c19e si:dkeyp-113d7.4	Si:dkeyp-113d7.4 protein (Fragment)	B0V3F8	prkra si:ch73-57b20.1 zgc:162619	Interferon-inducible double-stranded RNA-dependent protein kinase activator A homolog
A5PN03	edc4	Enhancer of mRNA-decapping protein 4				Q90XG0	tpi1b	Triosephosphate isomerase B (TIM-B) (EC 5.3.1.1) (Methylglyoxal synthase B) (EC 4.2.3.3) (Triose-phosphate isomerase B)	B0V3H3	snrpa	Small nuclear ribonucleoprotein polypeptide A (Fragment)
A0A0R4IB30						Q803M1	tpm3	Tropomyosin 3	B0V3R7	serpind1	Serpin peptidase inhibitor, clade D (heparin cofactor), member 1
E7F9A5	atp11c	Phospholipid-transporting ATPase (EC 7.6.2.1)				Q7SXW1	tpm4b zgc:63734	Tropomyosin 4b (Zgc:63734)	B0V3S8	myef2	Myelin expression factor 2
A0A0R4IB44						B8A516	tuba1b	Tubulin alpha chain	B1H1M3	plpbp PROSC prosc	Pyridoxal phosphate homeostasis protein (PLP homeostasis protein) (Proline synthase co-transcribed bacterial homolog protein)
A0A0R4IWS7	si:ch211-166e11.5	Si:ch211-166e11.5				Q6P972	tuba2	Tubulin alpha chain	B1WB51	hypk zgc:171549	Huntingtin-interacting protein K (Zgc:171549 protein)
A0A0R4IB53	enah	ENAH, actin regulator				Q6GQM1	tuba7l	Tubulin alpha chain	B1WB98	stk26 mst4 zgc:175288	Serine/threonine protein kinase 26 (Zgc:175288 protein)
A0A0R4IL10	ddx46	Probable ATP-dependent RNA helicase DDX46				Q6TNP9	tuba8l TUBA2 DKEYP-53E12.1-001	Tubulin alpha chain	B2GTW6	cs	Citrate synthase
A0A0R4IDN1	lamb1a	Laminin, beta 1a				Q6P5N0	tuba8l2	Tubulin alpha chain	B3DFN3	lmnb2	Lamin B2
F1QNK8	hyi	Putative hydroxypyruvate isomerase (EC 5.3.1.22)				A9JST4	tuba8l4	Tuba8l4 protein (Tubulin, alpha 8-like 4)	B3DFP9	apoa2 zgc:193613	Apolipoprotein A-II (Zgc:193613)
A0A0R4IB85	slc15a1a	Solute carrier family 15 member 1a				Q6DC49	tuba8l3 tuba8l3a	Tubulin alpha chain	B3DFQ1	capns1b	Calpain, small subunit 1 b (Capns1b protein)
A0A0R4IB94						Q6IQJ2	zgc:55461	Tubulin beta chain	B3DFS9	myh11a myh11	Myosin, heavy chain 11a, smooth muscle (Myosin, heavy polypeptide 11, smooth muscle)
A0A0R4IBA4	si:ch73-97h19.2	Si:ch73-97h19.2				Q6NW90	tubb5 Tubb5	Tubulin beta chain	B3DFY4	zgc:193742	Zgc:193742
A0A0R4IW79	kyat3 ccbl2	Kynurenine--oxoglutarate transaminase 3				Q566S9	tubb6 zgc:112515	Zgc:112515 protein	B3DGI9	timm8b	translocase of inner mitochondrial membrane 8 homolog B (Yeast)
A0A0R4IBA8	pnp5b	Purine nucleoside phosphorylase (EC 2.4.2.1) (Inosine-guanosine phosphorylase)				Q6P0E4	cyt1	Type I cytokeratin, enveloping layer	B3DGV1	stat6	Signal transducer and activator of transcription
A0A0R4IUU0						Q9PUB6	cki CKI	Type I cytokeratin	B3DHC5	apoa4b.2 zgc:194131	Apolipoprotein A-IV b, tandem duplicate 2 (Zgc:194131)
A0A0R4IBB6						Q9PW37		Type I keratin (Fragment)	B3DIL4	pctp LOC566726	Similar to Phosphatidylcholine transfer protein (PC-TP) (StAR-related lipid transfer protein 2) (StARD2) (START domain-containing protein 2)
A0A0R4IBB8						Q6P102	ywhabl	Tyrosine 3-monooxygenase/tryptophan 5-monooxygenase activation protein, beta polypeptide-like	B3DIP9	itgb3b	Integrin beta
F1QJ44						Q5PRD0	ywhaba ywhab1 wu:fb80c08	14-3-3 protein beta/alpha-A	B3DIV6	dlat	Acetyltransferase component of pyruvate dehydrogenase complex (EC 2.3.1.12)
A0A0R4IBD6	dcp1a	Decapping mRNA 1A				Q7T356	ywhabb ywhab ywhab2 zgc:64092	14-3-3 protein beta/alpha-B	B3DIX5	lemd3	Lemd3 protein
A0A0R4IBD8	itchb	E3 ubiquitin-protein ligase (EC 2.3.2.26)				Q7ZW20	ywhae1	Tyrosine 3-monooxygenase/tryptophan 5-monooxygenase activation protein, epsilon polypeptide 1 (Ywhae1 protein)	B3DJ34	pip4k2aa LOC560360	Phosphatidylinositol-5-phosphate 4-kinase, type II, alpha a (Similar to type II phosphatidylinositolphosphate kinase-alpha)
A0A0R4IBG2	acp1	Acid phosphatase 1				Q6IQT1	ywhaz ywhai	Ywhai protein	B3DJ50	cyp2aa3 zgc:63546	Cytochrome P450, family 2, subfamily AA, polypeptide 3 (Zgc:63546 protein)
F1QD27	supt5h	Transcription elongation factor SPT5				Q7ZU41	ywhaz ywhai	Tyrosine 3-monooxygenase/tryptophan 5-monooxygenase activation protein, iota polypeptide	B3DJG2	pcolceb LOC794872	Procollagen C-endopeptidase enhancer b (Similar to procollagen C-endopeptidase enhancer)
A0A0R4IBH0						Q803M8	ywhaqb ywhaq1 ywhaz	Tryosine 3-monooxygenase/tryptophan 5-monooxygenase activation protein, zeta polypeptide (Tyrosine 3-monooxygenase/tryptophan 5-monooxygenase activation protein, theta polypeptide b)	B3DKC0	fkbp10b fkbp10	Peptidylprolyl isomerase (EC 5.2.1.8)
A0A0R4IBH6						Q6P9P3	uba1	Ubiquitin-like modifier activating enzyme 1	B3DKC5	lmna	Lamin A
Q1LYI5	si:ch211-106n13.3	Si:ch211-106n13.3				Q7ZU99	vcp cdc48 si:ch211-113n10.2	Transitional endoplasmic reticulum ATPase (TER ATPase) (EC 3.6.4.6) (Protein CDC48) (Valosin-containing protein) (VCP)	B3DKI8	scfd1 sly1	Sec1 family domain-containing 1 (Suppressor of ypt1)
A0A0R4IBI6	fkbp10a	Peptidylprolyl isomerase (EC 5.2.1.8)				A9JRA9	zgc:172053	Zgc:172053 (Zgc:172053 protein)	B3DKJ0	cct7	T-complex protein 1 subunit eta (TCP-1-eta) (CCT-eta)
A0A0R4IBJ2	bxdc2	Brix domain-containing 2				B0S6Z1	dhx9 si:ch211-194i4.1	DEAH (Asp-Glu-Ala-His) box helicase 9	B3DKP3	ogt.1 ogt	O-linked N-acetylglucosamine (GlcNAc) transferase (UDP-N-acetylglucosamine:polypeptide-N-acetylglucosaminyl transferase) (O-linked N-acetylglucosamine (GlcNAc) transferase, tandem duplicate 1)
F1R6L1						Q5RI91	pimr132 si:dkey-197d18.2	Pim proto-oncogene, serine/threonine kinase,-related 132 (Fragment)	B3DLH5	plek2	Pleckstrin 2 (Plek2 protein)
Q561T2	ppie	Peptidyl-prolyl cis-trans isomerase E (PPIase E) (EC 5.2.1.8)				Q1LWN1			B6IDE7	frem2b	Fras1-related extracellular matrix protein 2b (Frem2b)
A0A0R4IK18	ctsc	Cathepsin C				Q3T7B3	vtg2 vg2	Vitellogenin 2 (Fragment)	B7SEE0	irf3	Interferon regulatory factor 3
F1QEY7	atp6v0a1a	V-type proton ATPase subunit a				Q1LWN5			B7ZD39	ppa1b ppa1	Pyrophosphatase (inorganic) 1b
A0A0R4IBL4	dcun1d1	DCN1-like protein (Defective in cullin neddylation protein 1-like protein)				Q3T7B0	vtg5 vg5	Vitellogenin 5 (Fragment)	B7ZDA2	galm	Aldose 1-epimerase (EC 5.1.3.3) (Galactose mutarotase)
A1A5V6	triobpb triobp zgc:158267	Zgc:158267				Q90YN8	vtg1 vg1	Vitellogenin 1	B7ZDB5	bgnb	Biglycan
A0A0R4IBM8	ilf3b	Interleukin enhancer-binding factor 3b (Fragment)				A8E4Y8	vtg6	Vtg6 protein	B7ZDD1	si:ch211-200p22.4	Si:ch211-200p22.4
Q6NWJ8	ugp2b zgc:85662	UTP--glucose-1-phosphate uridylyltransferase (EC 2.7.7.9)				Q1MTC5			B7ZDE9	htt	Huntingtin
F1QXI2						Q8AWD0	vdac2	Vdac2 protein (Voltage-dependent anion channel 2)	B7ZUU8	ap3d1 si:ch211-129c21.6	Adaptor-related protein complex 3 subunit delta 1 (Si:ch211-129c21.6)
E7FFE0	nelfa whsc2	Negative elongation factor complex member A				Q6NY25	wdr1	WD repeat domain 1	B7ZV06	chmp2a bc2	Bc2 protein (Charged multivesicular body protein 2a)
A0A0R4IBP3	os9	Osteosarcoma-amplified 9, endoplasmic reticulum lectin				B8JLF3			B7ZV28	ptpn23b si:dkeyp-114f9.2	Protein tyrosine phosphatase, non-receptor type 23, b (Si:dkeyp-114f9.2 protein)
A0A0R4IBQ0						Q568A3	capns1a capns1 zgc:110603	Calpain, small subunit 1 a (Zgc:110603 protein)	B7ZVU6	desi1b pppde2b	Desumoylating isopeptidase 1b (PPPDE peptidase domain containing 2b)
Q5SPP2	snx9b snx9l	Sorting nexin				Q4V918	psma3 zgc:114044	Proteasome subunit alpha type (EC 3.4.25.1)	B8A443
A0A0R4IBR9	capn5a	Calpain 5a (Fragment)				A3KP76	zgc:175088	Zgc:175088 protein (Fragment)	B8A445	slc44a1a slc44a1	Solute carrier family 44 member 1a (Fragment)
A0A0R4IPW0	tom1	Target of myb1 membrane-trafficking protein (Fragment)				Q7ZVE7	zgc:56064	Serine/threonine-protein phosphatase (EC 3.1.3.16)	B8A4B0	glud1a	Glutamate dehydrogenase 1a
A0A0R4IBS8	snx7	Sorting nexin 7							B8A4C9	cst3	Cystatin
A0A0R4IBT0	sf1	Splicing factor 1							B8A4D7	rrbp1a	Ribosome-binding protein 1a
F1Q4T0	dock11	Dedicator of cytokinesis 11							B8A4G1	dhrs7	Dehydrogenase/reductase (SDR family) member 7
Q6PC01	faua fau	40S ribosomal protein S30							B8A4H6	pgam1b	Phosphoglycerate mutase (EC 5.4.2.11) (EC 5.4.2.4)
A0A0R4IBX0	proser1	Proline and serine-rich 1							B8A4N9	golga5	Golgin subfamily A member 5
A0A0R4IBX9	si:ch73-1a9.3	Si:ch73-1a9.3							B8A4Q2	pdxkb DKEY-263M10.2-001	Novel protein similar to vertebrate pyridoxal (Pyridoxine, vitamin B6) kinase (PDXK) (Pyridoxal (pyridoxine, vitamin B6) kinase b)
A0A0R4IP97	atg16l1	ATG16 autophagy-related 16-like 1 (S. cerevisiae)							B8A4S4	col17a1a si:ch211-281g13.3	Collagen, type XVII, alpha 1a
A0A0R4IBY3	eloa tceb3	Elongin A (Fragment)							B8A4U0	cd99	CD99 molecule
F1RC64									B8A4U1	cd99	CD99 molecule
A0A0R4IC11	kars	Lysine--tRNA ligase (EC 6.1.1.6) (Lysyl-tRNA synthetase)							B8A518	tuba1c tuba1l	Tubulin alpha chain
E7F2D7									B8A589	paip2b	Poly(A)-binding protein-interacting protein 2B
A0A0R4IC28	aaas	Achalasia, adrenocortical insufficiency, alacrimia							B8A5D3	nars	Asparaginyl-tRNA synthetase
F2Z4T4	akap12b	A kinase (PRKA) anchor protein 12b							B8A5D4	txnl1	Thioredoxin-like 1
A0A0R4IC35	ogal mgea5l	O-GlcNAcase-like							B8A5E8
A0A0R4IC36	adarb2	Adenosine deaminase, RNA-specific, B2 (non-functional)							B8A5I7	ssbp1	Single-stranded DNA-binding protein 1
F6PBQ1	dhrs13a.1	Dehydrogenase/reductase (SDR family) member 13a, tandem duplicate 1							B8A5K2	itga6b	Integrin, alpha 6b
A0A0R4IC53	cfhl2	Complement factor H-like 2							B8A5L1	ecpas si:dkey-245p14.7	Ecm29 proteasome adaptor and scaffold
A0A0R4IC69									B8A5V6	pdlim1	PDZ and LIM domain 1 (elfin)
A0A0R4II13		Uncharacterized protein							B8A638	si:dkey-9i23.15	Si:dkey-9i23.15
A0A0R4IC81	abcc1	ATP-binding cassette, sub-family C (CFTR/MRP), member 1							B8A688	si:ch211-198a12.6	Si:ch211-198a12.6
A0A0R4IMY8	chmp6b	Charged multivesicular body protein 6b (Fragment)							B8JHR9	kpnb3	Karyopherin (importin) beta 3
A0A0R4ICA3									B8JHS0	farp1	FERM, RhoGEF (ARHGEF) and pleckstrin domain protein 1 (chondrocyte-derived)
F1REM0	mbnl3	Muscleblind-like-splicing regulator 3							B8JHU4	actn1	Actinin, alpha 1 (Actn1 isoform b)
E7FBP8									B8JHZ0	scpp7	Secretory calcium-binding phosphoprotein 7
A0A0R4ICC6	mvda	Diphosphomevalonate decarboxylase (EC 4.1.1.33)							B8JI00	suclg1 SUCLG1	Succinate--CoA ligase [ADP/GDP-forming] subunit alpha, mitochondrial (EC 6.2.1.4) (EC 6.2.1.5) (Succinyl-CoA synthetase subunit alpha) (SCS-alpha)
A0A0R4IYU4	stoml2	Stomatin (EPB72)-like 2							B8JI08	ogdha	Oxoglutarate (alpha-ketoglutarate) dehydrogenase a (lipoamide)
A5PMP2									B8JI15	rpia	Ribose 5-phosphate isomerase A (ribose 5-phosphate epimerase)
A0A0R4ICD5	e2f4	E2F transcription factor 4							B8JI17	psap	Prosaposin
Q6P5J2	c8g	Complement component 8, gamma polypeptide							B8JIC4
A0A0R4ICH2	brcc3	BRCA1/BRCA2-containing complex, subunit 3							B8JIH4	chuk	Inhibitor of nuclear factor kappa-B kinase subunit alpha
A0A0R4ICI1	map4k4 si:zfos-433a6.1	Mitogen-activated protein kinase kinase kinase kinase 4							B8JIJ7	rdh14a	Retinol dehydrogenase 14a
A0A0R4ICJ3									B8JIS1	atp5pb atp5f1	ATP synthase peripheral stalk-membrane subunit b
A0A0R4IWI7	kif5aa	Kinesin family member 5A, a							B8JIS5	gstm.3 gstm3	Glutathione S-transferase mu tandem duplicate 3
A0A0R4ICL5	sec24a	SEC24 homolog A, COPII coat complex component							B8JIS8	gstm.1 gstm	Glutathione S-transferase mu, tandem duplicate 1
A0A0R4ICM0									B8JJ32	sfxn3	Sidoreflexin
A0A0R4ICP4	si:ch73-347e22.8	Si:ch73-347e22.8							B8JK19	sftpbb si:ch211-283h6.6	Surfactant protein Bb
A0A0R4ICP8	nfkb1	Nuclear factor of kappa light polypeptide gene enhancer in B-cells 1 (Fragment)							B8JK21	casp3a	Caspase 3, apoptosis-related cysteine peptidase a (Caspase 3a)
A6XCT1	ndrg4	NDRG family member 4 (Ndrg4)							B8JKC9	hk2 DKEYP-106C11.1-001	Hexokinase 2
F1QG24	fas	Fas cell surface death receptor							B8JKH9	pcnp	PEST proteolytic signal-containing nuclear protein
A0A286YA34	ppp3cca	Serine/threonine-protein phosphatase (EC 3.1.3.16)							B8JKJ4	washc2c fam21c	WASH complex subunit 2C (Fragment)
Q6PH44	bsg	Basigin (Bsg protein) (cDNA, clone cssl:d0229)							B8JKN6	ppiaa ppia	Peptidyl-prolyl cis-trans isomerase (PPIase) (EC 5.2.1.8)
A0A0R4IR31	zgc:103700	Zgc:103700							B8JKP3	tpmt.1	Thiopurine S-methyltransferase, tandem duplicate 1
A0A0R4ICS9	mia2	MIA SH3 domain ER export factor 2 (Fragment)							B8JKW4	c3a.1 si:dkey-76b14.4	Complement component c3a, duplicate 1
A0A0R4ICT0	ptk2aa	Protein tyrosine kinase 2aa							B8JKY9	snrpd1	Small nuclear ribonucleoprotein Sm D1 (snRNP core protein D1) (Fragment)
A0A0R4ICU6	lsr	Lipolysis-stimulated lipoprotein receptor							B8JL23	tspan14	Tetraspanin
A0A0R4ICU8									B8JL30	hmgb2a hmgb2	High mobility group box 2a
A0A0R4ICW1	svild si:dkeyp-94b4.1	Supervillin d							B8JL43	tfa	Serotransferrin
B7ZVT7									B8JL46	eif4g1a	Eukaryotic translation initiation factor 4 gamma, 1a
A0A0R4ICZ3	epc1a	Enhancer of polycomb homolog							B8JL82	ssr3	Signal sequence receptor, gamma
Q19VG7	antxr2a cmg2a si:ch211-116k3.1	Anthrax toxin receptor							B8JLE6	rasef si:ch73-275j21.1	Ras and EF-hand domain-containing protein
A0A0R4ID09	rps6ka3a	Ribosomal protein S6 kinase (EC 2.7.11.1)							B8JLJ3	ywhaz	Tyrosine 3-monooxygenase/tryptophan 5-monooxygenase activation protein, zeta polypeptide
A0A0R4ID22									B8JLJ8	hnrpkl	Heterogeneous nuclear ribonucleoprotein K,-like
A0A0R4ID31									B8JLK4
X1WBN3	tmem232	Transmembrane protein 232							B8JLK8	itgav	Integrin, alpha V
A0A0R4ID58	rnf40	E3 ubiquitin protein ligase (EC 2.3.2.27)							B8JLR1	pdcd6ip	Programmed cell death 6-interacting protein
A2BHA7	srsf7a	Serine and arginine-rich-splicing factor 7a (Fragment)							B8JLR6	si:ch211-251b21.1	Si:ch211-251b21.1
A0A0R4ID71	evplb	Envoplakin b							B8JLR8	rab35b rab35	RAB35, member RAS oncogene family b
A0A0R4ID81	rab11fip2	RAB11 family-interacting protein 2 (class I)							B8JLU1	patl1	Protein PAT1 homolog 1 (Fragment)
A0A0R4ID82	vps33a	Vacuolar protein sorting 33A							B8JLW8	gmps	Guanine monophosphate synthase
A0A0R4ID90									B8JLZ3	anxa1b	Annexin
A0A0R4ID94	rab3il1	RAB3A-interacting protein (rabin3)-like 1							B8JLZ4
A0A0R4ID97	tmprss4a	Transmembrane serine protease 4a							B8JM11	epcam	Epithelial cell adhesion molecule
A0A0R4IDB7	cdc42bpaa	Non-specific serine/threonine protein kinase (EC 2.7.11.1)							B8JM34	atp5pf atp5j	ATP synthase-coupling factor 6, mitochondrial (ATPase subunit F6)
A0A0R4IDC2	si:dkey-78p8.1	Si:dkey-78p8.1							B8JM93	igbp1	Immunoglobulin (CD79A)-binding protein 1
A0A0R4IDC5	sh3d21	SH3 domain-containing 21 (Fragment)							B8JMA7	ugt2a4	UDP-glucuronosyltransferase (EC 2.4.1.17)
A0A0R4IGQ0	letm1	Mitochondrial proton/calcium exchanger protein							B8JMC1	blvrb	Biliverdin reductase B
A0A0R4IDD4	mapta	Microtubule-associated protein							B8JMI5	prg4a	Proteoglycan 4a
A0A0R4IIF3									B8JMZ3	dpy30	Dpy-30 histone methyltransferase complex regulatory subunit
A0A0R4IDE6	nedd4a	E3 ubiquitin-protein ligase (EC 2.3.2.26)							C1IHU9	itln3 INTL3	Intelectin 3
Q6A3P5	ndrg1a ndrg1 ndrg1a-2	N-myc downstream regulated gene 1 protein, ndrg1 (N-myc downstream-regulated 1a) (N-myc downstream-regulated gene 1a-2)							D3TI80	aqp3b	Aquaporin-3b
B0V1I8	hnrnpa3	Heterogeneous nuclear ribonucleoprotein A3 (Fragment)							D6MUD3	col11a1b COL11A1b	Collagen type XI alpha-1b (Collagen, type XI, alpha 1b)
A0A0R4IDG4	sorbs1	Sorbin and SH3 domain-containing 1							E7EXC7
A0A0R4IDI0									E7EXF9
A0A0R4IDJ2	actr5	Actin-related protein 5							E7EXG2	dbnlb	Drebrin-like b
A0A0R4IDS4									E7EXH1
F1QIJ7									E7EXJ6	nup188	Nucleoporin 188
A0A0R4IDK6									E7EXK6
A0A0R4IDL2	lcat	Lecithin-cholesterol acyltransferase (Fragment)							E7EXL6	myofl	Myoferlin-like
F6PCP5	cblc	Cbl proto-oncogene C, E3 ubiquitin protein ligase							E7EXW8	glg1a	Golgi glycoprotein 1a
A0A0R4IDN8	spdl1 CCDC99 SPDL1	Protein Spindly (Coiled-coil domain-containing protein 99) (Spindle apparatus coiled-coil domain-containing protein 1)							E7EXX4
A0A0R4IHQ4	si:ch211-188p14.5	Si:ch211-188p14.5 (Fragment)							E7EXY4	ago2 AGO2 EIF2C2	Protein argonaute-2 (Argonaute2) (EC 3.1.26.n2) (Eukaryotic translation initiation factor 2C 2) (eIF-2C 2) (eIF2C 2) (Protein slicer)
Q5RFW3	nup43	Nucleoporin 43							E7EY13	chdh	Choline dehydrogenase (EC 1.1.99.1)
A0A0R4IDS3	poldip3	Polymerase (DNA-directed), delta-interacting protein 3							E7EY23	snrnp70	Small nuclear ribonucleoprotein 70 (U1)
A2BGH2	ppil2	Peptidylprolyl isomerase (cyclophilin)-like 2							E7EY75
A0A0R4IDW0	scarb1	Scavenger receptor class B, member 1							E7EYD4	cpt1cb	Carnitine palmitoyltransferase 1Cb
Q6NV37	gyg1a gyg1	Glycogenin 1 (Glycogenin 1a) (Gyg1 protein)							E7EYF3	uba7	Ubiquitin-like modifier-activating enzyme 7
A0A0R4IWN3									E7EYK1	rabl6b	RAB, member RAS oncogene family-like 6b
A0A0R4IDX7	tshz3b	Teashirt zinc finger homeobox 3b							E7EYQ0	serbp1b	SERPINE1 mRNA-binding protein 1b
E7F3X7	kdm3b	Lysine (K)-specific demethylase 3B							E7EYU4
F1R7F7									E7EYW2	epn2	Epsin 2
A0A0R4IE20	ahsa1b	AHA1, activator of heat shock protein ATPase homolog 1b							E7EYW5	cst14a.1	Cystatin 14a, tandem duplicate 1
A0A0R4IE40	mprip	Myosin phosphatase Rho-interacting protein							E7EZ02	lsm8 LSM8	U6 snRNA-associated Sm-like protein LSm8
Q7YP14									E7EZ16
A0A0R4IE44									E7EZ31	tulp4b	Tubby-like protein 4b
A0A0R4IE46									E7EZ94	gstt1a	Glutathione S-transferase theta 1a
B0S5M5	lss	Terpene cyclase/mutase family member (EC 5.4.99.-)							E7EZA7
G1K2I6									E7EZB3
A2CE77	rasa4 si:dkey-93f15.3	RAS p21 protein activator 4							E7EZD6	usp4	Ubiquitin-specific peptidase 4 (proto-oncogene)
Q6DBU7	suds3	SDS3 homolog, SIN3A corepressor complex component (Suppressor of defective silencing 3 homolog (SDS3, S. cerevisiae))							E7EZE2	stt3b	STT3B, subunit of the oligosaccharyltransferase complex (catalytic)
A0A0R4ILM6	exoc6b	Exocyst complex component							E7EZE6	lsm3 LSM3	U6 snRNA-associated Sm-like protein LSm3
A0A0R4IEF8	zc3h18	Zinc finger CCCH domain-containing protein 18							E7EZF4	lsp1	Lymphocyte-specific protein 1 (Fragment)
U6BNE9									E7EZF5
A0A0R4IEI5	nop53 gltscr2	Ribosome biogenesis protein NOP53							E7EZK3	si:ch211-203d1.3	Si:ch211-203d1.3
F1RBF8	kcnh1a kcnh1	Potassium voltage-gated channel subfamily H member 1a (Potassium voltage-gated channel, subfamily H (eag-related), member 1a)							E7EZL7
A0A0R4IEK4									E7EZP9	fhl3a fhl3	Four and a half LIM domains 3a
A9C3Q3	anapc7	Anaphase-promoting complex subunit 7							E7EZS4
A0A0R4IEM8	srsf1a	Serine/arginine-rich-splicing factor 1A							E7EZW6	srpra srpr	SRP receptor subunit alpha
A0A0R4IEN6	si:ch211-209n20.1	Si:ch211-209n20.1							E7F064	apc2	Adenomatosis polyposis coli 2 (Fragment)
A0A0R4IEN9	si:ch73-47f2.1	Si:ch73-47f2.1							E7F071	hnrnpul1l	Heterogeneous nuclear ribonucleoprotein U-like 1 like
A0A0R4IEP5	map7d1a	MAP7 domain-containing 1a							E7F084	kif13bb	Kinesin family member 13Bb
F1R4M6	sort1a	Sortilin							E7F091
B0UY93	tnika	TRAF2 and NCK-interacting kinase a							E7F0A1	pfn1	Profilin
Q6IQI2	lgals2a lgals1l2	Galectin							E7F0E2	gnpda2	Glucosamine-6-phosphate isomerase (EC 3.5.99.6) (Glucosamine-6-phosphate deaminase)
A0A0R4IER2	brcc3	BRCA1/BRCA2-containing complex, subunit 3							E7F0E8	xpo1a	Exportin 1 (CRM1 homolog, yeast) a
A0A0R4IER5	ptpn22	Protein tyrosine phosphatase, non-receptor type 22							E7F0G7	mark2b	Non-specific serine/threonine protein kinase (EC 2.7.11.1)
A0A0R4IER9	daam1a	Dishevelled-associated activator of morphogenesis 1a							E7F0H0
A0A0R4IES8	rca2.2	Regulator of complement activation group 2 gene 2							E7F0H8	hmgb3b	High mobility group box 3b
A2ATX6	nt5c2a	5'-nucleotidase, cytosolic IIa							E7F0L7
A0A0R4IEU0	erbin erbb2ip	Erbb2-interacting protein							E7F0Q4
A0A0R4IEV6	si:ch211-202f5.3	Si:ch211-202f5.3							E7F0X5	LOC100538089	Uncharacterized protein
A0A0R4IXJ1	elavl4	ELAV-like protein							E7F0X6	smc1a	Structural maintenance of chromosomes protein
A0A0R4IEX8	pfkla	ATP-dependent 6-phosphofructokinase (ATP-PFK) (Phosphofructokinase) (EC 2.7.1.11) (Phosphohexokinase)							E7F0Y9	si:ch211-91p5.3	Si:ch211-91p5.3
F1RAC4	pwp2h	PWP2, small subunit processome component							E7F114	sec31b	SEC31 homolog B, COPII coat complex component
Q1RLT7									E7F123	si:ch211-106j24.1	Aminopeptidase (EC 3.4.11.-)
F1QF86	ppp3ccb	Serine/threonine-protein phosphatase (EC 3.1.3.16)							E7F1G1
A0A0R4IF39	mcm7 MCM7	DNA replication licensing factor MCM7 (EC 3.6.4.12)							E7F1L9	eps8l1b si:ch73-70c5.1	Eps8-like 1b
Q5RHP5	acbd3	Acyl-Coenzyme A-binding domain-containing 3							E7F1M5	frk fynrk	Tyrosine-protein kinase (EC 2.7.10.2)
A0A0R4IZL2									E7F1Q8
A0A0R4IF62	zgc:171731	Zgc:171731							E7F1R1
A0A0R4IF65	mcm2	DNA helicase (EC 3.6.4.12)							E7F1R6
F1RA14									E7F1R9	arhgap27l	Rho GTPase-activating protein 27,-like
A0A0R4IF88	vipas39	Spermatogenesis-defective protein 39 homolog (Fragment)							E7F1S0	vps13c	Vacuolar protein sorting 13 homolog C (S. cerevisiae)
A0A0R4IYV7		Argininosuccinate synthase 1							E7F1T8
A0A0R4IFA2	nde1	NudE neurodevelopment protein 1							E7F1U6
A0A0R4IJY6	myh11b	Myosin, heavy chain 11b, smooth muscle							E7F221	frmd8	FERM domain-containing 8
A0A0R4IFC5	cybc1	Cytochrome b-245 chaperone 1 homolog							E7F225	zgc:163061	Zgc:163061
F1QZY9	rtn4ip1	Reticulon-4-interacting protein 1 homolog, mitochondrial							E7F237	gapvd1	GTPase-activating protein and VPS9 domains 1
A0A0R4IFF2									E7F282
A0A0R4IFI0	rptor	Regulatory-associated protein of MTOR, complex 1							E7F290	si:ch211-222l21.1	Si:ch211-222l21.1
A0A0R4IFI9									E7F292	mapk13	Mitogen-activated protein kinase (EC 2.7.11.24)
A0A0R4IFJ4	pcxa	Pyruvate carboxylase (EC 6.4.1.1)							E7F2B6	parga	Poly (ADP-ribose) glycohydrolase a
A0A0R4IFK0	capn2a	Calpain 2, (m/II) large subunit a							E7F2J2
A0A0R4IFK5	mrps30	Mitochondrial ribosomal protein S30							E7F2J3
A0A0R4IFK9	pmpca	Peptidase (mitochondrial-processing) alpha							E7F2M0
A0A0R4IFL5		Uncharacterized protein							E7F2M5	cd59	CD59 molecule (CD59 blood group)
A0A0R4IFM7									E7F2N7
A0A0R4IVS1	nrp1a	Neuropilin-1a							E7F2Q5
A0A0R4IFR6	mrpl15	39S ribosomal protein L15, mitochondrial							E7F2T3
A0A0R4IFS1	si:ch211-241b2.5	Si:ch211-241b2.5 (Fragment)							E7F2X0	clip1a	CAP-GLY domain-containing linker protein 1a
B0S578	aak1a	AP2-associated kinase 1a (Fragment)							E7F2Z3
A0A0R4IFT2	slit2	Slit homolog 2 (Drosophila)							E7F304
A0A0R4IFT8	usp47	Ubiquitin-specific peptidase 47							E7F330
A5WVJ8	apaf1	Apoptotic protease-activating factor 1 (APAF-1)							E7F333	lrrc8c	Leucine-rich repeat-containing 8 VRAC subunit C
Q5XJ22									E7F338
A0A0R4IFY5	si:ch211-119e14.1	Si:ch211-119e14.1							E7F354	ywhag2	3-monooxygenase/tryptophan 5-monooxygenase activation protein, gamma polypeptide 2
F1QYU7	mat2aa MAT2AA	S-adenosylmethionine synthase (EC 2.5.1.6)							E7F370	cdh26.1	Cadherin 26, tandem duplicate 1
B7ZDE9	htt	Huntingtin							E7F372	rasa1b	RAS p21 protein activator (GTPase-activating protein) 1b
Q566S5	pdrg1 zgc:112519	P53 and DNA-damage-regulated 1 (Zgc:112519)							E7F3A5	si:ch211-212k18.7	Si:ch211-212k18.7
F1R091	ifi35	Interferon-induced protein 35							E7F3G8	si:ch211-113j14.1	Si:ch211-113j14.1
B3DHC5	apoa4b.2 zgc:194131	Apolipoprotein A-IV b, tandem duplicate 2 (Zgc:194131)							E7F3I1
Q5U3T9	pitpnc1b zgc:101640	Phosphatidylinositol transfer protein cytoplasmic 1b (Zgc:101640)							E7F3I8	dhx15	DEAH (Asp-Glu-Ala-His) box helicase 15
A0A0R4IG45	dnm1a	Dynamin 1a							E7F3J2	hnrnpua	Heterogeneous nuclear ribonucleoprotein Ua
F1Q6Z9	ganab	Glucosidase, alpha; neutral AB							E7F3M9
Q1L940									E7F3Q4
A0A0R4IG59	bnip1b	BCL2-interacting protein 1b							E7F3X7	kdm3b	Lysine (K)-specific demethylase 3B
A5PMP1	capn1b si:dkeyp-101g1.3	Calpain 1, (mu/I) large subunit b							E7F3Z5	crtc3	CREB-regulated transcription coactivator 3
A0A0R4IG82									E7F408	si:ch73-334d15.1	UDP-glucuronosyltransferase (EC 2.4.1.17)
A0A0R4IG89	si:zfos-943e10.1	Si:zfos-943e10.1 (Fragment)							E7F422	mustn1a	Musculoskeletal, embryonic nuclear protein 1a
Q5RG20	asap2a	ArfGAP with SH3 domain, ankyrin repeat and PH domain 2a							E7F427	LOC100333227	Uncharacterized protein
A0A0R4IGA5									E7F464	gan	Uncharacterized protein
A0A0R4IGA6	uraha urah	5-hydroxyisourate hydrolase (HIU hydrolase) (HIUHase) (EC 3.5.2.17)							E7F471
F1QQM1	khdc4 kiaa0907	KH homology domain-containing protein 4							E7F4A5
A0A0R4IRN7	si:ch211-235e9.8	Si:ch211-235e9.8							E7F4G5	dqx1	DEAQ box RNA-dependent ATPase 1
A0A0R4IGB6	eef1da	Eukaryotic translation elongation factor 1 delta a (guanine nucleotide exchange protein) (Fragment)							E7F4I1	hbaa1	Hbaa1 protein
A0A0R4IGB8	ep400	E1A-binding protein p400							E7F4L2	map3k8	Mitogen-activated protein kinase kinase kinase 8
A0A0R4IGB9									E7F4L4	washc4 si:dkey-23p11.2	WASH complex subunit 4
A0A0R4IGC4									E7F4L5	prkcdb	Protein kinase C delta type (EC 2.7.11.13) (nPKC-delta)
Q503T8	zgc:110158	Zgc:110158							E7F4R0	afdna mllt4 mllt4a si:ch211-278j12.1	Afadin, adherens junction formation factor a
A0A0R4IGD3	sgip1a	SH3-domain GRB2-like (endophilin)-interacting protein 1a							E7F4R9	idh2	Isocitrate dehydrogenase 2 (NADP+), mitochondrial
A0A0R4IGD7	plcd1a	Phosphoinositide phospholipase C (EC 3.1.4.11)							E7F4T0	plecb	Plectin b
B8JHS8	slc8a3	Solute carrier family 8 member 3							E7F4T4	zc3h7bb zc3h7b	Zinc finger CCCH-type-containing 7Bb
Q7ZVA3	sh3gl1b	SH3-domain GRB2-like 1b (Sh3gl1b protein)							E7F4V0
I3ISJ6	neu3.5 si:dkey-11j5.6	Sialidase 3 (membrane sialidase), tandem duplicate 5							E7F539
A0A0R4ILY1	ctsa	Carboxypeptidase (EC 3.4.16.-)							E7F569	si:ch211-153b23.5	Si:ch211-153b23.5
A0A0R4IGH3	si:ch73-106k19.2	Si:ch73-106k19.2							E7F573
A0A0R4IGH7	rrp7a	Ribosomal RNA-processing 7 homolog A							E7F5A2
A0A0R4IGI1	gapdh	Glyceraldehyde-3-phosphate dehydrogenase (EC 1.2.1.12)							E7F5A4	si:dkey-261m9.12	Si:dkey-261m9.12
A0A0R4IGI4	pclob	Piccolo presynaptic cytomatrix protein b							E7F5H5
F1QCQ7	stom	Stomatin							E7F5I3	postna	Periostin, osteoblast-specific factor a
A0A0R4IGK8	tgm5l	Transglutaminase 5,-like							E7F5P8	slc36a1	Solute carrier family 36 member 1
A0A0R4IGL0									E7F5R7	myo1cb myo1c	Myosin Ic, paralog b
A0A0R4IGL6	hectd1	HECT domain-containing 1							E7F5S6	nol6	Nucleolar protein 6
A0A0R4IGM5	utp6	UTP6, small subunit (SSU) processome component, homolog (yeast)							E7F5U9
A0A0R4IGM8	mia3	MIA SH3 domain ER export factor 3							E7F5V5	and1	Actinodin1
A0A0R4IGN3	pdia3	Protein disulfide-isomerase (EC 5.3.4.1) (Fragment)							E7F630	rp1l1a	Retinitis pigmentosa 1-like 1a
A0A0R4IGN5									E7F646	plcd4b	Phosphoinositide phospholipase C (EC 3.1.4.11)
A0A0R4IGP6	pkma	Pyruvate kinase (EC 2.7.1.40)							E7F6H7	dync1i2a	Dynein, cytoplasmic 1, intermediate chain 2a
F1QFY1	cul5b	Cullin 5b							E7F6K2
A0A0R4IGQ7	fkbp3	Peptidylprolyl isomerase (EC 5.2.1.8)							E7F6M9	rilp	Rab-interacting lysosomal protein
A0A0R4IGS0	ptprfb	Protein tyrosine phosphatase, receptor type, f, b							E7F6S3
A0A0R4IGS2	si:ch73-55i23.1	Si:ch73-55i23.1							E7F6T7
Z4YHX5	prpf18	Pre-mRNA-splicing factor 18							E7F715	sec24b	SEC24 homolog B, COPII coat complex component
A0A0R4IGT8	magi3a	Membrane-associated guanylate kinase, WW and PDZ domain-containing 3a							E7F735
A0A0R4IGU0	cnn1b	Calponin							E7F791
A0A286YB58									E7F7A4
A0A0R4IGV9	palm2	Paralemmin 2							E7F7A5
Q1LXR3	rrbp1b rrbp1	Ribosome-binding protein 1b							E7F7C7
A0A0R4IGX3	itln3	Intelectin 3							E7F7D8
F1R1C9	ttc7b	Tetratricopeptide repeat domain 7B							E7F7F9		Uncharacterized protein
F1R1L5	itpr3	Inositol 1,4,5-trisphosphate receptor, type 3 (Fragment)							E7F7J1	fdx1	Ferredoxin 1
Q5RG54	ppat	Amidophosphoribosyltransferase (ATase) (EC 2.4.2.14) (Glutamine phosphoribosylpyrophosphate amidotransferase)							E7F7L6
A0A0R4ILK8									E7F7M1	si:dkey-164f24.2	Si:dkey-164f24.2
A0A0R4IH35	mccc1	Methylcrotonoyl-CoA carboxylase 1 (alpha)							E7F7N0
A0A0R4IH39	rab6a	RAB6A, member RAS oncogene family							E7F7Q5
A0A0R4IH45	med30	Mediator of RNA polymerase II transcription subunit 30							E7F7S1
A0A0R4IH71	dnaja2a dnaja2	DnaJ heat shock protein family (Hsp40) member A2a							E7F7T3
A0A0R4IH75									E7F7U1	pxnb	Paxillin b
A0A0R4IH79	lonp1 LONP1	Lon protease homolog, mitochondrial (EC 3.4.21.53)							E7F7U8
A0A0R4IH93	zgc:110045	Zgc:110045							E7F811	tom1l2	Target of myb1-like 2 membrane-trafficking protein
Q7ZTS0	bco1 bcmo1 bcmo1a	Beta-carotene 15,15'-monooxygenase 1 (Beta-carotene oxygenase 1)							E7F812	si:dkey-152b24.7	Si:dkey-152b24.7
A0A0R4IHA8	chrac1	Chromatin accessibility complex subunit 1							E7F8A7	entpd5a	Ectonucleoside triphosphate diphosphohydrolase 5a
A0A0R4IHC0									E7F8C0	ipo9	Importin 9
A0A0R4IHD6	foxred1	FAD-dependent oxidoreductase domain-containing 1							E7F8E0
A0A0R4IHE6	si:dkey-72l17.5	Si:dkey-72l17.5							E7F8G5	arhgap35a	Rho GTPase-activating protein 35a
A0A0R4IHF9	fgf2	Fibroblast growth factor (FGF)							E7F8M9	fam169ab	Family with sequence similarity 169 member Ab (Fragment)
A0A0R4IHH8									E7F8Q5	huwe1	HECT, UBA and WWE domain-containing 1
A0A0R4IHJ1	snrpf	Small nuclear ribonucleoprotein polypeptide F							E7F8T6	nampta	Nicotinamide phosphoribosyltransferase (NAmPRTase) (EC 2.4.2.12)
I3IT87	ap2m1b	AP-2 complex subunit mu-B							E7F8U9
A0A0R4ISD5									E7F8X0	srpx2 si:ch73-137d5.1	Sushi-repeat-containing protein X-linked 2
A0A0R4IHK7									E7F8Z8	si:dkey-152b24.8	Si:dkey-152b24.8 (Fragment)
Q6NYE6	cyb5r3	NADH-cytochrome b5 reductase (EC 1.6.2.2)							E7F947
Q6NV39	elmo1	Engulfment and Cell motility 1 (Ced-12 homolog, C. elegans)							E7F948		Transportin 2
A0A0R4IHQ6	zgc:64201	Zgc:64201							E7F983	akap12a	A kinase (PRKA) anchor protein 12a
Q5RGA7	bpnt1	Bisphosphate nucleotidase 1							E7F9A0
E7FE08	tjp1b si:dkey-33l14.1	Tight junction protein 1b							E7F9A2	fto	Fat mass and obesity-associated (Fragment)
A0A0R4IHT0	slc25a12	Solute carrier family 25 member 12							E7F9D9	si:ch73-308l14.2	Si:ch73-308l14.2
A0A0R4IHT2									E7F9F1	larsa	Leucyl-tRNA synthetase a
A0A0R4IHU9	glrx3	Glutaredoxin 3							E7F9G5
A0A0R4IHV1	pkmb	Pyruvate kinase (EC 2.7.1.40)							E7F9L3	slc27a1b	Solute carrier family 27 member 1b (Fragment)
A0A2C9F1U3	mib1	E3 ubiquitin-protein ligase mib1							E7F9L8	myo1d si:ch211-94l19.4	Unconventional myosin-Id (Myosin 1d) (Myosin1D)
Q1RLV7	ccdc93	Coiled-coil domain-containing 93							E7F9M6	pfkla	ATP-dependent 6-phosphofructokinase (ATP-PFK) (Phosphofructokinase) (EC 2.7.1.11) (Phosphohexokinase)
A0A0R4ILL8	klhdc4	Kelch domain-containing 4							E7F9M7	si:ch73-18b11.1	Si:ch73-18b11.1
A0A0R4IHX4									E7F9N7
A0A0R4IHX8	sat2b	Spermidine/spermine N1-acetyltransferase family member 2b							E7F9T0	mical1	[F-actin]-monooxygenase mical1 (EC 1.14.13.225) (Molecule interacting with CasL protein 1) (MICAL-1)
A0A0R4II06	si:dkey-151j17.4	Si:dkey-151j17.4							E7F9X9	rock1	Rho-associated protein kinase (EC 2.7.11.1)
A0A0R4II12	gne	Glucosamine (UDP-N-acetyl)-2-epimerase/N-acetylmannosamine kinase							E7F9Y7	tagln3b	Transgelin 3b
A0A0R4II16	psmf1	Proteasome inhibitor subunit 1							E7FA12	trappc8	Trafficking protein particle complex 8
Q1MTC8	mhc2dab DKEYP-2H4.1-001	Major histocompatibility complex class II DAB gene (Novel protein similar to vertebrate major histocompatibility complex class II DAB gene (Mhc2dab))							E7FA22	si:ch211-251p5.5	Si:ch211-251p5.5
Q5TZE9	ints13 asun	Integrator complex subunit 13							E7FA31
A0A0R4II71	si:ch73-236c18.8	Si:ch73-236c18.8							E7FAA1	si:ch211-157c3.4	Si:ch211-157c3.4
A0A0R4II76	acat1	Acetyl-CoA acetyltransferase, mitochondrial							E7FAD0	myhz1.1	Myosin, heavy polypeptide 1.1, skeletal muscle
A0A0R4II89	cat	Catalase (EC 1.11.1.6)							E7FAE7	si:ch211-105c13.3	Si:ch211-105c13.3
Q7T3L5	cdk9	Cyclin-dependent kinase 9 (Cyclin-dependent kinase 9 (CDC2-related kinase))							E7FAF8
Q1RLQ1	stmn1a stmn1	Stathmin							E7FAL0
F1QUA3	tln2a tln2	Talin 2a							E7FAN0	cc2d1a	Uncharacterized protein
A0A0R4IPQ8	cfh	Complement factor H							E7FAN5	f2	Coagulation factor II (thrombin)
A0A0R4IP15	neo1a	Neogenin 1a							E7FAP3
A0A0R4IIB5									E7FAQ8	hnrnpa1a	Heterogeneous nuclear ribonucleoprotein A1a
F1R9T0	aldh5a1	Succinate-semialdehyde dehydrogenase (EC 1.2.1.24) (Fragment)							E7FAR0
A0A0R4IIC4	dennd4c	DENN/MADD domain-containing 4C							E7FAS1
A0A0R4IIC5	fam83fb	Family with sequence similarity 83 member Fb							E7FAT1	dlg1	Disks large homolog 1
A0A0R4IID1									E7FAT4
A0A0R4IID7	tln2b	Talin 2b (Fragment)							E7FAU1	si:dkey-108k21.14	Si:dkey-108k21.14
A0A0R4IIF7									E7FAW6
A3KNV8	ubfd1 zgc:162578	Ubiquitin family domain-containing 1 (Zgc:162578 protein)							E7FAY2	rmdn2	Regulator of microtubule dynamics 2
A0A0R4IIK8									E7FAZ2	git1	G protein-coupled receptor kinase-interacting ArfGAP 1
A0A0R4IIH9	adkb	Adenosine kinase b							E7FAZ5	hp1bp3	Heterochromatin protein 1,-binding protein 3
A0A0R4IIJ1	wu:fd46c06	Wu:fd46c06							E7FB02
A0A0R4IIK5	ecm1b	Extracellular matrix protein 1b							E7FB15
A0A0R4IIN4	zgc:114173	Zgc:114173							E7FB18
A0A0R4IUJ4	cfhl3	Complement factor H-like 3							E7FB37	ptbp3 si:dkey-27p1.2	Polypyrimidine tract-binding protein 3
A0A0R4IIN8	nudt6	Nudix (nucleoside diphosphate-linked moiety X)-type motif 6							E7FB39	myo5ab	Myosin VAb
A0A0R4IIN9	lnpep	Leucyl/cystinyl aminopeptidase							E7FB42	fat2	FAT atypical cadherin 2
A0A0R4IIP1	dus3l	tRNA-dihydrouridine(47) synthase [NAD(P)(+)] (EC 1.3.1.-) (tRNA-dihydrouridine synthase 3)							E7FB58	fdxr	NADPH:adrenodoxin oxidoreductase, mitochondrial (EC 1.18.1.6)
T1SXK0	dnm2a	Dynamin 2a							E7FB76	col21a1	Collagen, type XXI, alpha 1
A0A0R4IIR5	mapk15	Mitogen-activated protein kinase (EC 2.7.11.24)							E7FBB9	tjp2a	Tight junction protein 2a (zona occludens 2)
F1Q8P0	mhc1zfa	MHC class I antigen ZFA transcript variant 1 (Major histocompatibility complex class I ZFA)							E7FBD3	apoba	Apolipoprotein Ba
A0A0R4IIV4									E7FBD5	iqgap1	IQ motif-containing GTPase-activating protein 1
A0A0R4IIV6	si:ch211-76m11.5	Si:ch211-76m11.5							E7FBM2
A0A0R4IIX0	si:zfos-588f8.1	Si:zfos-588f8.1							E7FBN8
A0A0R4IIZ7									E7FBR0	pkp1b pkp1	Plakophilin 1b
F1QA07	arhgef7b	Rho guanine nucleotide exchange factor (GEF) 7b							E7FBS6
F1QJL0	chia.6	Chitinase, acidic.6							E7FC17
A0A0R4IJ08									E7FC21	nt5c2a	5'-nucleotidase, cytosolic IIa
A0A0R4IJ12	clns1a	Chloride channel, nucleotide-sensitive, 1A							E7FC31
Q0E671	cmasa cmas cmas1	N-acylneuraminate cytidylyltransferase A (EC 2.7.7.43) (CMP-sialic acid synthetase 1)							E7FC32	tubb1 si:ch211-122i22.4	Tubulin beta chain
A0A0R4IJ15									E7FC33	stag1b si:ch211-197k23.5	Stromal antigen 1b
Q6P125	utp4 cirh1a	Cirrhosis, autosomal recessive 1A (Cirhin) (UTP4, small subunit processome component)							E7FC82	fam129ab si:dkeyp-92f1.1	Family with sequence similarity 129 member Ab
A0A0R4IY38	znf207b	Zinc finger protein 207, b							E7FCE3	grhl1	Grainyhead-like transcription factor 1
A0A0R4IJ22									E7FCE5	ppp1r37	Protein phosphatase 1 regulatory subunit 37
E7FGM4	tnrc6a	Trinucleotide repeat-containing 6a							E7FCI8
A0A0R4IJ30	opa1	Dynamin-like 120 kDa protein, mitochondrial							E7FCN5	itgb2	Integrin beta
A0A0R4IJ31	si:dkey-219e21.4	Si:dkey-219e21.4							E7FCN9	cspg4	Chondroitin sulfate proteoglycan 4
F1QHM2	si:ch211-156l18.7	Si:ch211-156l18.7							E7FCP6
A0A0R4IJ38									E7FCQ0	cnbpb cnbp	CCHC-type zinc finger, nucleic acid-binding protein b
F1R074	agrn	Agrin							E7FCU0	npm1a	Nucleophosmin 1a
A0A0R4IJ41	tax1bp1a	Tax1-binding protein 1 homolog A							E7FCV2	c5	Complement component 5
Q6P0U5	tcea3	Transcription elongation factor A (SII), 3							E7FCV5
A0A0R4IJ45									E7FCV6
Q6AZB2	oxct1a fj36f06 fj48g08 oxct1 wu:fj36f06 wu:fj48g08 zgc:92003	Succinyl-CoA:3-ketoacid-coenzyme A transferase (EC 2.8.3.5)							E7FCV8	col6a2	Collagen, type VI, alpha 2
A0A0R4IR43	ano1	Anoctamin							E7FCW1	wu:fk65c09	Wu:fk65c09
Q568N7									E7FCW2
A0A0R4IJ71	plecb	Plectin b							E7FCY3	ccdc136b	Coiled-coil domain-containing 136b
A0A0R4IJ75	ints1	Integrator complex subunit 1							E7FCZ2	apnl	Actinoporin-like protein
A0A0R4IJA4									E7FD66	aass	Aminoadipate-semialdehyde synthase
A0A0R4IJB1	si:dkey-74k8.3	Si:dkey-74k8.3							E7FD91	ddx6	DEAD (Asp-Glu-Ala-Asp) box helicase 6
F1R6A1	hmbsb	Hydroxymethylbilane synthase, b							E7FDA8
A0A0R4IJB4	zgc:153916	Zgc:153916							E7FDC3
A0A0R4IJC7	yme1l1b	YME1-like 1b							E7FDL3	si:ch211-136m16.8	Si:ch211-136m16.8
A0A0R4IJD3									E7FDL6	fhod1	Formin homology 2 domain-containing 1
A0A0R4IJE4	zgc:194469	Zgc:194469							E7FDL7	sntb2	Syntrophin, beta 2
A0A0R4IJF3									E7FDM6
A0A0R4IJF5	pam16	Mitochondrial import inner membrane translocase subunit tim16							E7FDP4	galk2	Galactokinase 2
A0A0R4IJG9	prkar1b	Protein kinase, cAMP-dependent, regulatory, type I, beta (Fragment)							E7FDU0	bckdhb	Branched chain keto acid dehydrogenase E1, beta polypeptide
A0A0R4IJJ3	si:dkey-16p6.1	Si:dkey-16p6.1							E7FDX0		Uncharacterized protein
A0A0R4IJL2	naga	Alpha-galactosidase (EC 3.2.1.-)							E7FDY1	ehbp1l1a	EH domain-binding protein 1-like 1a
A0A0R4IU05	ap1g1	AP-1 complex subunit gamma							E7FDY7	g6pd	Glucose-6-phosphate 1-dehydrogenase (EC 1.1.1.49)
Q6IQK3	vamp3	Vesicle-associated membrane protein 3 (Cellubrevin)							E7FDZ1	ftr80	FinTRIM family, member 80
A0A0R4IJN8									E7FE01	dis3	DIS3 exosome endoribonuclease and 3'-5' exoribonuclease
A0A0R4IJP7									E7FE06
A0A0R4IJQ7	zgc:162816	Zgc:162816							E7FE19	cnp	2',3'-cyclic nucleotide 3' phosphodiesterase
A0A0R4IJR6	cdh1	Cadherin 1, type 1, E-cadherin (epithelial)							E7FE29	myo18ab	Myosin XVIIIAb
E7F648	cep63	Centrosomal protein of 63 kDa							E7FE33	farp2	FERM, RhoGEF and pleckstrin domain protein 2
A0A0R4IJS1	col4a3bpb	Collagen, type IV, alpha 3 (Goodpasture antigen)-binding protein b							E7FE47	col5a2b	Collagen, type V, alpha 2b
A0A0R4IJS6	khdrbs3	Uncharacterized protein							E7FE90	fetub	Fetuin B
Q5RGI2	nup107	Nuclear pore complex protein							E7FED8	unm_sa911	Un-named sa911
Q6NX09									E7FEE9	si:dkey-178k16.1	Si:dkey-178k16.1
A0A0R4IJV2									E7FEH9	pea15	Proliferation and apoptosis adaptor protein 15
A0A0R4IJV5	ddx52	DEAD (Asp-Glu-Ala-Asp) box polypeptide 52							E7FEK9	golga4	Golgin A4
A0A0R4IJX3									E7FEN9
A0A0R4IJX6	cant1b	Calcium-activated nucleotidase 1b							E7FEQ1
A0A0R4IJY8									E7FES0
A0A0R4IK06	ankfy1	Ankyrin repeat and FYVE domain-containing 1							E7FEW7
A0A0R4IK14	sh3d21	SH3 domain-containing 21							E7FEZ9	atox1	Antioxidant 1 copper chaperone (Copper chaperone Atox1)
A0A0R4IK35	ephx5	Epoxide hydrolase 5							E7FF10	vwa1	von Willebrand factor A domain-containing 1
A0A0R4IWL5	capn8	Calpain 8							E7FF74
A0A0R4IK68	pank4	Pantothenate kinase 4							E7FFA5	ace	Angiotensin-converting enzyme (EC 3.4.-.-)
A0A0R4IK94									E7FFA8
A0A0R4IKC7	btr24	Bloodthirsty-related gene family, member 24							E7FFC4	aifm2	Apoptosis-inducing factor, mitochondrion-associated, 2
F8W5Q4	atf7ip	Activating transcription factor 7-interacting protein 1							E7FFD0		Uncharacterized protein
A0A0R4IKF0	apoa1b	Apolipoprotein A-Ib							E7FFK0	atp8b1 si:ch211-180b7.2	Phospholipid-transporting ATPase (EC 7.6.2.1)
B7SEE1	irf5	Interferon regulatory factor 5							E7FFM8	zgc:92481	Zgc:92481
A0A0R4IKF7	suox	Sulfite oxidase							E7FFT5	hmgn6 si:dkeyp-86f7.3	High mobility group nucleosome-binding domain 6
A0A0R4IKH3									E7FFU8
Q2YDQ8	phykpl zgc:123007	5-phosphohydroxy-L-lysine phospho-lyase (Zgc:123007)							E7FFY5	adamtsl4	Uncharacterized protein
A0A0R4IKI3	trim25	Tripartite motif-containing 25							E7FFY8	grik1a	Glutamate receptor, ionotropic, kainate 1a
A0A0R4IKJ1									E7FG48	tppp3	Tubulin polymerization-promoting protein family member 3
A0A0R4IVD0	arid1aa	AT-rich interactive domain 1Aa (SWI-like)							E7FG64
A0A0R4IKN3	anxa5b	Annexin							E7FG71	fbn2b	Fibrillin 2b (Fragment)
A0A0R4IKN8	ptcd3	Pentatricopeptide repeat domain-containing protein 3, mitochondrial							E7FG81	col12a1b si:ch211-106k22.1	Collagen, type XII, alpha 1b
A0A0R4IKS1	tgm1l2	Transglutaminase 1-like 2							E7FG92	tmtc3	Transmembrane and tetratricopeptide repeat-containing 3
A0A0R4IKT0	fah	Fumarylacetoacetase (EC 3.7.1.2) (Fumarylacetoacetate hydrolase)							E7FGA5	gsr	Glutathione reductase (EC 1.8.1.7)
A0A0R4IKT2									E7FGD2
A0A0R4IKU3									E7FGE3
A0A0R4IW74	fgfr1op	FGFR1 oncogene partner							E7FGE9
E7F9T3									E7FGH2
A0A0R4IKV1	ttll12	Tubulin tyrosine ligase-like family, member 12							E7FGK1	eml3	EMAP-like 3
A0A0R4IKV4									E7FGL4	abhd17ab si:rp71-61h23.3	Abhydrolase domain-containing 17Ab
A0A0R4IKW3	eif4a3	Eukaryotic initiation factor 4A-III							E7FGM1	si:dkey-27b3.2	Si:dkey-27b3.2
A0A0R4IKW4	zgc:63569	Zgc:63569							E7FGP2	cars	Cysteinyl-tRNA synthetase
A0A0R4IKX4	tsr1	TSR1, 20S rRNA accumulation, homolog (S. cerevisiae)							E7FGT2	h6pd si:dkey-148l2.3	Hexose-6-phosphate dehydrogenase (glucose 1-dehydrogenase)
Q503G3									E7FGY8
A0A0R4IL21									E7FGZ9	zc3h4	Zinc finger CCCH-type-containing 4
A0A0R4IL24	si:dkeyp-20g2.1	Si:dkeyp-20g2.1							E7FH34
A0A0R4IL29	calr3b	Calreticulin 3b							E7FH58	ntm	Neurotrimin
A0A0R4IL40	si:ch211-215p11.1	Si:ch211-215p11.1 (Fragment)							E7FH67
A0A0R4IL58	ctu1 ATPBD3 CTU1 NCS6	Cytoplasmic tRNA 2-thiolation protein 1 (EC 2.7.7.-) (ATP-binding domain-containing protein 3) (Cytoplasmic tRNA adenylyltransferase 1)							E9QB19
A0A0R4IL64									E9QB24	tmem67	Transmembrane protein 67
A0A0R4IL67									E9QB97	ca6	Carbonic anhydrase VI
A0A0R4IL71	ide CH211-129M12.3 CH211-129M12.3-001	Insulin-degrading enzyme (Novel protein similar to H.sapiens IDE, insulin-degrading enzyme (IDE, zgc:162603))							E9QBA4	ptpmt1	Protein tyrosine phosphatase, mitochondrial 1
A0A0R4ILA8	psmc3	Proteasome 26S subunit, ATPase 3							E9QBC9	cast	Calpastatin (Fragment)
F1QBQ8									E9QBD1	naxd carkd	ATP-dependent (S)-NAD(P)H-hydrate dehydratase (Fragment)
A0A0R4ILD9	eif2b1	Eukaryotic translation initiation factor 2B, subunit 1 alpha							E9QBD2	si:dkey-175g6.5	Si:dkey-175g6.5
A0A0R4ILE7	mcm6l	DNA helicase (EC 3.6.4.12)							E9QBD7	krt5	Keratin 5 (Fragment)
F1QHE9	ndufs7	NADH:ubiquinone oxidoreductase core subunit S7							E9QBF0	tpi1b	Triosephosphate isomerase (EC 5.3.1.1) (Fragment)
A0A0R4ILH1	kif16ba	Kinesin family member 16Ba (Fragment)							E9QBG3
A0A0R4ILH4	snx1b	Sorting nexin 1b							E9QBR7	casp6l1	Caspase 6, apoptosis-related cysteine peptidase,-like 1 (Fragment)
A0A0R4ILH7	sf3a3	Splicing factor 3a, subunit 3							E9QBU8	si:ch211-285f17.1	Si:ch211-285f17.1
F1Q5A9	ube4b	Ubiquitination factor E4B, UFD2 homolog (S. cerevisiae)							E9QBV1	cltcb	Clathrin heavy chain
F1QA25	poglut1 ktelc1 zgc:123318	Protein O-glucosyltransferase 1 (Zgc:123318)							E9QBZ2	ankrd28b	Ankyrin repeat domain 28b
A0A0R4ILJ1	map7d1b	MAP7 domain-containing 1b							E9QBZ4	fermt1 si:ch73-22c10.1	Fermitin family member 1
A0A0R4ILM0	si:ch211-194m7.8	Si:ch211-194m7.8							E9QBZ6	sdcbp2	Syndecan-binding protein (syntenin) 2 (Fragment)
A0A0R4ILM1	abhd10a	Abhydrolase domain-containing 10a							E9QC43	cbx5	Chromobox homolog 5 (HP1 alpha homolog, Drosophila) (Fragment)
A0A0R4ILM2									E9QC46	cast	Calpastatin
A0A0R4ILM7	dip2ba dip2bb	Disco-interacting protein 2 homolog B-A (Disco-interacting protein 2 homolog Bb)							E9QC86	rbb4l	Retinoblastoma-binding protein 4,-like
A0A0R4ILN1									E9QCD1	fga	Fibrinogen alpha chain
A0A0R4ILN3	ncdn	Neurochondrin							E9QCG0	commd6	COMM domain-containing 6
A0A0R4ILN6	fbln1	Fibulin-1							E9QCK7	pappa2 papp-a2	Papp-a2 (Pappalysin 2)
A0A0R4ILN7									E9QCP4	lamp1b lamp1	Lysosomal-associated membrane protein 1b
E7F8S2	kif5ab si:ch73-130n22.1	Kinesin-like protein (Fragment)							E9QCP7	esyt2a	Extended synaptotagmin-like protein 2a
A0A0R4ILS4	trpc6a trpc6	Transient receptor potential cation channel, subfamily C, member 6a (Trpc6 protein)							E9QCW6	prpf31	U4/U6 small nuclear ribonucleoprotein Prp31 (Fragment)
A0A0R4ILS8	hspbp1	HSPA (heat shock 70kDa)-binding protein, cytoplasmic cochaperone 1							E9QCZ3
F1RBW3									E9QCZ8	shc1 si:dkey-246i14.4	SHC (Src homology 2 domain-containing)-transforming protein 1
A0A0R4ILV8	col18a1b si:dkey-257h21.1	Collagen type XVIII alpha 1 chain b							E9QD31	hmga1a	High mobility group AT-hook 1a
A0A0R4ILW8	ggps1	Geranylgeranyl diphosphate synthase 1							E9QD36	stambpa	STAM-binding protein-like A
Q1LYC7	nova1	Neuro-oncological ventral antigen 1							E9QD37	ube2d1a	Ubiquitin-conjugating enzyme E2D 1a
A0A0R4IM03	si:ch73-18b11.1	Si:ch73-18b11.1							E9QD55	prpf38b	Pre-mRNA-splicing factor 38B
A0A0R4IPE3	tmx4	Thioredoxin-related transmembrane protein 4 (Fragment)							E9QDB5	med14	Mediator of RNA polymerase II transcription subunit 14 (Mediator complex subunit 14)
A1IH00	golga2 drgm130	Cis-Golgi matrix protein GM130 (Golgin A2)							E9QDE1	ftr61	FinTRIM family, member 61 (Fragment)
A0A0R4IM33	srrt	Serrate RNA effector molecule homolog							E9QDE9	rabgap1l	RAB GTPase-activating protein 1-like
F1R1U9	si:dkey-21e2.13	Si:dkey-21e2.13 (Fragment)							E9QDK6	snap23.1	Synaptosomal-associated protein (Fragment)
A0A0R4IRP5	sh3pxd2b	SH3 and PX domains 2B							E9QDR6	si:ch211-183d21.1	Si:ch211-183d21.1
A0A0R4IM99	tpm2	Tropomyosin 2 (beta)							E9QDS5	uba5	Ubiquitin-like modifier-activating enzyme 5
A0A0R4IMF2									E9QDT9
F1QAA4	eif4ba	Eukaryotic translation initiation factor 4Ba							E9QDU1	ccdc43	Coiled-coil domain-containing protein 43
A0A0R4IMF9	glyr1	Putative oxidoreductase GLYR1							E9QDU2	myo9b	Myosin IXb
A0A0R4IMG2	gnsb	N-acetylglucosamine-6-sulfatase (EC 3.1.6.14) (Glucosamine-6-sulfatase)							E9QDW5	rangap1b rangap1	Ran GTPase-activating protein 1b (Fragment)
A0A0R4IMG3	them6 si:ch73-52e5.1	Protein THEM6							E9QDX8	ctsba	Cathepsin Ba (Fragment)
F1QLX2	plcg1	Phosphoinositide phospholipase C (EC 3.1.4.11) (Fragment)							E9QDY3
A0A286YAD0	myo5b	Myosin VB							E9QDY4
A0A0R4IMI8	pkdc si:ch211-215k15.5	Protein kinase-like domain-containing							E9QE25	babam2 bre	BRISC and BRCA1-A complex member 2 (Fragment)
A0A0R4IML0	capgb	Capping protein (actin filament), gelsolin-like b							E9QE29	mapk9	Mitogen-activated protein kinase (EC 2.7.11.24)
A0A0R4IMM2	mrps7	28S ribosomal protein S7, mitochondrial							E9QE40	npsn npsnl	Metalloendopeptidase (EC 3.4.24.-) (Fragment)
A0A0R4IMM3	trappc13	Trafficking protein particle complex subunit 13							E9QE47	pafah1b3	Platelet-activating factor acetylhydrolase, isoform Ib, gamma subunit
A0A0R4IMM5	ppa1a	Pyrophosphatase (inorganic) 1a							E9QE89	luc7l	LUC7-like (S. cerevisiae)
A0A0R4IMM7	mre11a	Double-strand break repair protein							E9QEE4	hnrnpm	Heterogeneous nuclear ribonucleoprotein M
Q6P022	u2af2b	U2 snRNP auxiliary factor large subunit							E9QEE8	ndufb4	NADH:ubiquinone oxidoreductase subunit B4
A0A0R4IMP8	ppp4r1l	Protein phosphatase 4, regulatory subunit 1-like (Fragment)							E9QEK2	tpd52l2b	Tpd52-like 2b
A0A0R4IMR0									E9QEQ1	apoc2	Apolipoprotein C-II
A0A0R4IMR9	fam49a znf395	Family with sequence similarity 49 member A							E9QET4	tjp1a tjp1	Tight junction protein 1a
A0A0R4IMS1	xrn2	5'-3' exoribonuclease 2 (Fragment)							E9QEY4	lrrc57	Leucine-rich repeat-containing protein 57 (Fragment)
A0A0R4IMS3	rpl24	60S ribosomal protein L24							E9QF10	si:dkey-27p18.3	Si:dkey-27p18.3 (Fragment)
A0A0R4IMS9	polr2a	DNA-directed RNA polymerase subunit (EC 2.7.7.6)							E9QF17
A0A0R4IMU2	trappc2	Trafficking protein particle complex subunit 2							E9QF30	si:dkey-82j4.2	Si:dkey-82j4.2
A0A0R4IMW5									E9QF35	cast	Calpastatin (Fragment)
A0A0R4IMY4									E9QF76	arfgef2 si:dkey-192i18.4	ADP-ribosylation factor guanine nucleotide-exchange factor 2 (brefeldin A-inhibited)
A0A0R4IMY9	dtnba	Dystrobrevin							E9QF97	sec31a	Protein transport protein Sec31A
A0A0R4IMZ5									E9QFD8	vtg7	Vitellogenin 7
A0A0R4IMZ8	kpnb1	Karyopherin (importin) beta 1							E9QFE1	myh14	Myosin, heavy chain 14, non-muscle
A0A0R4IN07	col5a3b	Collagen, type V, alpha 3b							E9QFI0	elob tceb2	Elongin B
A0A0R4IN20	znf1169	Zinc finger protein 1169 (Fragment)							E9QFI5	dbi	Diazepam-binding inhibitor (GABA receptor modulator, acyl-CoA binding protein)
A0A0R4IN26	sept15	Septin 15							E9QFP7	emd	Emerin (Emery-Dreifuss muscular dystrophy)
A0A0R4IN38									E9QFS3	macf1a	Microtubule-actin crosslinking factor 1a
A0A0R4IN44	pdlim5a	PDZ and LIM domain 5a							E9QFU8	bcat2	Branched-chain-amino-acid aminotransferase (EC 2.6.1.42)
A0A0R4IN46	tgm1l1	Transglutaminase 1-like 1 (Fragment)							E9QFX0	apoc1 apoc1l	Apolipoprotein C-I
A0A0R4IN59	si:ch73-281k2.5	Si:ch73-281k2.5							E9QFY5	plcd1a	Phospholipase C, delta 1a (Fragment)
A0A0R4IN64									E9QG13	akr1a1b	Aldo-keto reductase family 1 member A1-B (Fragment)
A0A140LH76	gbe1b	Glucan (1,4-alpha-),-branching enzyme 1b							E9QG44
A0A0R4IN78	stk24b	Serine/threonine kinase 24b (STE20 homolog, yeast)							E9QG66	emc1 si:dkey-7c22.1	ER membrane protein complex subunit 1
Q1LVI0	gatad2ab gatad2a	GATA zinc finger domain-containing 2Ab							E9QGA3	micu1	Calcium uptake protein 1, mitochondrial
A0A0R4IN88	si:dkeyp-115e12.6	Si:dkeyp-115e12.6							E9QGB0
A0A0R4IN96									E9QGH3	cast	Calpastatin (Fragment)
F1QZR2	pak4	Non-specific serine/threonine protein kinase (EC 2.7.11.1)							E9QGI1
D3KYK7	gphna	Molybdopterin molybdenumtransferase (EC 2.10.1.1) [Includes: Molybdopterin adenylyltransferase (MPT adenylyltransferase) (EC 2.7.7.75) (Domain G); Molybdopterin molybdenumtransferase (MPT Mo-transferase) (EC 2.10.1.1) (Domain E)]							E9QGJ1	arhgef16	Rho guanine nucleotide exchange factor (GEF) 16
A0A0R4INA9	si:ch211-197h24.9	Si:ch211-197h24.9							E9QGK4	wdr37	WD repeat domain 37 (Fragment)
A0A0R4INB1	tgm1l4	Transglutaminase 1-like 4							E9QGT9
A0A0R4IND9									E9QH15	eftud2	Elongation factor Tu GTP-binding domain-containing 2
A0A0R4INE2	mbd2	Methyl-CpG-binding domain protein 2							E9QH81
A0A0R4INE3	p3h4	Prolyl 3-hydroxylase family member 4 (non-enzymatic)							E9QH88	apoc4	Apolipoprotein C-IV
F1QXJ4	stxbp3	Syntaxin-binding protein 3							E9QHI1	tnc	Tenascin C
E7FF48	ncor2	Nuclear receptor corepressor 2							E9QHJ8
A0A0R4INI3									E9QHK0	cast	Calpastatin (Fragment)
F1QZD3	uap1	UDP-N-acetylglucosamine pyrophosphorylase 1							E9QHN0
A0A0R4ITJ1	si:dkeyp-93a5.3	Si:dkeyp-93a5.3							E9QHN4
A0A0R4IU44	itih3b	Inter-alpha-trypsin inhibitor heavy chain 3b							E9QHR6	tmem11	Transmembrane protein 11, mitochondrial
A0A0R4INQ4	si:ch211-175l6.2	Si:ch211-175l6.2 (Fragment)							E9QHT1	zgc:100868	Zgc:100868
A0A0R4INQ5	erap2	Aminopeptidase (EC 3.4.11.-)							E9QHX7	adrm1 adrm1b	Adhesion-regulating molecule 1 (Fragment)
A0A0R4INQ9	agpat4	1-acylglycerol-3-phosphate O-acyltransferase 4 (lysophosphatidic acid acyltransferase, delta)							E9QHX8	ssr4	Signal sequence receptor, delta
A0A0R4INR1	aspm	Abnormal spindle microtubule assembly							E9QHY3	phf5a	PHD finger protein 5A
A0A0R4INR8									E9QI07
A0A0R4INS7	hexdc	Hexosaminidase (glycosyl hydrolase family 20, catalytic domain)-containing							E9QI45	grna	Granulin a
A0A0R4INT5									E9QI62	flna	Filamin A, alpha (actin-binding protein 280)
A0A0R4INU1	rbm12	RNA-binding motif protein 12							E9QIC1	cdc5l	CDC5 cell division cycle 5-like (S. pombe)
A0A0R4INX2									E9QIF0	mapre1b	Microtubule-associated protein, RP/EB family, member 1b (Fragment)
A0A0R4INX3									E9QIG8	ponzr1	Plac8 onzin-related protein 1
A0A0R4INY2	postnb	Periostin, osteoblast-specific factor b							E9QIH3	lrrc8aa lrrc8a	Leucine-rich repeat-containing 8 VRAC subunit Aa
Q8AYH1									E9QIH7
A0A0R4INZ8	dbt	Dihydrolipoamide acetyltransferase component of pyruvate dehydrogenase complex (EC 2.3.1.-) (Fragment)							E9QIK0	emd	Emerin (Emery-Dreifuss muscular dystrophy)
A0A0R4ISD4	nudt12	Nudix (nucleoside diphosphate-linked moiety X)-type motif 12							E9QIK2	mdka	Midkine a (Fragment)
A0A0R4IP07									E9QIQ3	nup62l	Nucleoporin 62-like
E7F9V7	plekha6	Pleckstrin homology domain-containing, family A member 6							E9QIR9	rpl10	60S ribosomal protein L10 (Fragment)
A0A0R4IP12	pds5b	PDS5 cohesin-associated factor B							E9QIS9	scrn3	Secernin-3 (Fragment)
E9QCB2	si:ch211-191j22.3	Si:ch211-191j22.3							E9QIX6
A0A0R4IP25	si:dkey-103e21.5	Si:dkey-103e21.5							E9QJ40	fam120c	Family with sequence similarity 120C
F1QLH0									E9QJ57	si:dkeyp-82a1.6	Si:dkeyp-82a1.6
Q803Y1	tk1 TK1	Thymidine kinase (EC 2.7.1.21)							E9QJ83	pum3	Pumilio homolog 3
A0A0R4IQ44	irak4	Interleukin-1 receptor-associated kinase 4							E9QJ92	mgst2	Microsomal glutathione S-transferase 2
A0A0R4IP53	taok1b	TAO kinase 1b							E9QJ96	ywhaba	14-3-3 protein beta/alpha-A (Fragment)
A0A0R4IP59	col14a1b	Collagen, type XIV, alpha 1b (Fragment)							E9QJG3	si:dkey-7f3.14	Si:dkey-7f3.14
A0A0R4IP79	itgb6	Integrin beta (Fragment)							E9QJI4	si:ch211-264f5.6	Si:ch211-264f5.6
B8JLL7	ttr	Transthyretin							F1Q4M0
B2GRL9	setdb1b	Setdb1b protein							F1Q4M1	jac7	Jacalin 7
A0A0R4IPA7	spef2	Sperm flagellar 2							F1Q4M2	rdh12l	Retinol dehydrogenase 12,-like
A0A0R4IPB3									F1Q4M7
A0A0R4IPB8	lrrc20	Leucine-rich repeat-containing 20							F1Q4N4	ndufs2	NADH:ubiquinone oxidoreductase core subunit S2
B3DIZ3									F1Q4N7	anp32b	Acidic (leucine-rich) nuclear phosphoprotein 32 family, member B
A0A0R4IPD4	dscaml1	Down syndrome cell adhesion molecule-like 1 (Fragment)							F1Q4Q1	zgc:112496	Zgc:112496
A0A0R4IPD5	cdk11b	Cyclin-dependent kinase 11B							F1Q4Q4	lmf2b	Lipase maturation factor
F1QS86	si:dkey-46g23.5	Si:dkey-46g23.5							F1Q4Q8	sardh	Sarcosine dehydrogenase
E9QC46	cast	Calpastatin							F1Q4R1	dock6 si:dkey-114l24.1	Dedicator of cytokinesis 6
A0A0R4IPF8	ss18	Synovial sarcoma translocation, chromosome 18 (H. sapiens)							F1Q4X4
G1K2M1	phactr4a	Phosphatase and actin regulator							F1Q4X5	c4	Complement component 4
A0A0R4IPH2	tubb2b tubb4b	Tubulin beta chain							F1Q4X8	evpla	Envoplakin a
A0A0R4IPK7	vps4b	Vacuolar protein sorting 4b homolog B (S. cerevisiae)							F1Q4Y0	arhgef1b	Rho guanine nucleotide exchange factor (GEF) 1b
F1Q931	larp1b	La ribonucleoprotein domain family, member 1B							F1Q510	enosf1	Enolase superfamily member 1
A0A0R4IPL8	cfhl4	Complement factor H-like 4							F1Q520
A0A0R4IPM5	sp6	Sp6 transcription factor							F1Q555	gpd2	Glycerol-3-phosphate dehydrogenase 2 (mitochondrial)
A0A0R4IPN3	mlst8	Target of rapamycin complex subunit lst8							F1Q5B5	alpl alp	Alkaline phosphatase (EC 3.1.3.1)
A0A0R4IPN9	fnbp1b	Formin-binding protein 1b							F1Q5D5	hars	Histidyl-tRNA synthetase
A0A0R4IPQ0	sh3glb2b	SH3-domain GRB2-like endophilin B2b							F1Q5D8	vtnb	Vitronectin b
F1R3Q3	sept6	Septin 6							F1Q5Z2	ap1s1	AP complex subunit sigma
A0A0R4IPR8	git1	G protein-coupled receptor kinase-interacting ArfGAP 1							F1Q649	tns1b tns1	Tensin 1b
A0A0R4IPS0	phb2b	Prohibitin 2b							F1Q670
Q1L881									F1Q688	cavin2a sdpra	Caveolae-associated protein 2a
A0A0R4IPS7									F1Q6A4	comtd1	Catechol-O-methyltransferase domain-containing 1 (Fragment)
A0A0R4IV87	lsr	Lipolysis-stimulated lipoprotein receptor							F1Q6D6
A0A0R4IPU5	actr3b	Actin-related protein 3B							F1Q6E4	jpt2 hn1l	Jupiter microtubule-associated homolog 2
A0A0R4IPV1	alad	Delta-aminolevulinic acid dehydratase (EC 4.2.1.24)							F1Q6E8	nap1l4b	Nucleosome assembly protein 1-like 4b (Fragment)
A0A0R4ISX6									F1Q6F9	sltm	SAFB-like, transcription modulator
A0A0R4IQ11	scinla	Scinderin-like a							F1Q6K1	usp24	Ubiquitin-specific peptidase 24
X1WB94	si:ch1073-110a20.7	Si:ch1073-110a20.7							F1Q6P3	col6a1	Collagen, type VI, alpha 1
A0A0R4IQ23									F1Q6Q6	myo6a	Myosin VIa
A0A0R4IQ24									F1Q6S1	npepl1	Aminopeptidase-like 1
A0A0R4IQ31									F1Q6S4	abhd16a	Abhydrolase domain-containing 16A
A2BFN7	hmbsa	Hydroxymethylbilane synthase a (Fragment)							F1Q6U3
A0A0R4IQ78									F1Q6U4	hbae3 OTTDARP00000001847 bY119C3.4-001 dZ118J2.11-001	Hbae3 protein (Hemoglobin alpha embryonic-3) (Novel alpha-globin) (Novel alpha-type globin)
A0A0R4IQ83	si:ch211-156b7.4	Si:ch211-156b7.4							F1Q6U5
A0A0R4IQ84									F1Q6V2
A0A0R4IQ88	dglucy c17h14orf159	D-glutamate cyclase							F1Q6W6
A0A0R4IQA6	pdxdc1	Pyridoxal-dependent decarboxylase domain-containing protein 1							F1Q6Y7
A0A0R4IQD1									F1Q6Z1	faf2	Fas-associated factor family member 2
A0A0R4IQD3									F1Q6Z3	mpc1	Mitochondrial pyruvate carrier
A0A0R4IQD4	si:dkey-21e2.7	Si:dkey-21e2.7							F1Q6Z5	cnbpa zff9	CCHC-type zinc finger, nucleic acid-binding protein a
A0A0R4IQE3									F1Q6Z7	zgc:56064	Serine/threonine-protein phosphatase (EC 3.1.3.16)
F1QNL8	zgc:153921	Zgc:153921							F1Q740	vars	Valyl-tRNA synthetase
A0A0R4IQG1	hmgcs1	3-hydroxy-3-methylglutaryl coenzyme A synthase (HMG-CoA synthase) (EC 2.3.3.10)							F1Q749	dkc1	Dyskeratosis congenita 1, dyskerin
A0A0R4IQG8									F1Q759	tat	Tyrosine aminotransferase
Q7ZYX4									F1Q774	eif3jb EIF3J EIF3S1	Eukaryotic translation initiation factor 3 subunit J (eIF3j) (Eukaryotic translation initiation factor 3 subunit 1) (eIF-3-alpha) (eIF3 p35)
A0A0R4IQI6	si:ch211-11n16.2	Si:ch211-11n16.2							F1Q795	zmp:0000000735	Zmp:0000000735
F1R417	rock2b	Rho-associated protein kinase (EC 2.7.11.1)							F1Q798
Q1LUU8	znf384l DKEY-264N13.6-001	Novel protein similar to vertebrate zinc finger protein 384 (ZNF384) (Zinc finger protein 384-like) (Znf384l protein)							F1Q7A2	fhl1b fhl	Four and a half LIM domains 1b
F1QM13	stxbp1a	Syntaxin-binding protein 1a							F1Q7D8	si:ch211-127b6.2	Si:ch211-127b6.2
A0A0R4IQN0	si:ch211-162e15.3	Si:ch211-162e15.3							F1Q7F3	pora POR	NADPH--cytochrome P450 reductase (CPR) (P450R) (EC 1.6.2.4)
A0A0R4IQN2									F1Q7F8	rbm4.2	RNA-binding motif protein 4.2
F1RE85	naca	Nascent polypeptide-associated complex subunit alpha							F1Q7F9	sypl2a	Synaptophysin-like 2a
A7MCK9									F1Q7G9	prss16	Serine protease 16
A7MC00									F1Q7K7	casp3b	Caspase 3, apoptosis-related cysteine peptidase b
A0A0R4IQR2	tpst1	Protein-tyrosine sulfotransferase (EC 2.8.2.20)							F1Q7L0	vtg4	Vitellogenin 4 (Fragment)
A0A0R4IQR3									F1Q7N1	si:ch1073-291c23.1 ch1073-291c23.1	Si:ch1073-291c23.1 (Fragment)
F1QW01	mocs3 MOCS3 UBA4	Adenylyltransferase and sulfurtransferase MOCS3 (Molybdenum cofactor synthesis protein 3) [Includes: Molybdopterin-synthase adenylyltransferase (EC 2.7.7.80) (Adenylyltransferase MOCS3) (Sulfur carrier protein MOCS2A adenylyltransferase); Molybdopterin-synthase sulfurtransferase (EC 2.8.1.11) (Sulfur carrier protein MOCS2A sulfurtransferase) (Sulfurtransferase MOCS3)]							F1Q7N2	capn5a	Calpain 5a
Q6ZM60	atp2a2b	Calcium-transporting ATPase (EC 7.2.2.10)							F1Q7P8
A0A140LGV3									F1Q7R9	entpd1	Ectonucleoside triphosphate diphosphohydrolase 1
F1QC13	pacsin2	Protein kinase C and casein kinase substrate in neurons 2							F1Q7S8	ago3a AGO3 EIF2C3	Protein argonaute-3 (Argonaute3) (Eukaryotic translation initiation factor 2C 3) (eIF-2C 3) (eIF2C 3)
A0A0R4IQV2									F1Q7V0	becn1	Beclin-1 (Fragment)
A0A0R4IUB2	ankhd1	Ankyrin repeat and KH domain-containing 1							F1Q814
A0A0R4IQV5									F1Q820	farsb	Phenylalanyl-tRNA synthetase subunit beta
E7FC28									F1Q828	map1sa	Microtubule-associated protein 1Sa (Fragment)
A0A0R4IQZ2	zdhhc13	Palmitoyltransferase (EC 2.3.1.225)							F1Q854
A0A0R4IQZ3									F1Q861	zgc:153921	Zgc:153921
F1QCV2	hdac10	Polyamine deacetylase HDAC10 (EC 3.5.1.48) (EC 3.5.1.62) (Histone deacetylase 10)							F1Q863
A0A0R4IR17	arid1ab	AT-rich interactive domain 1Ab (SWI-like) (Fragment)							F1Q869
A0A0R4IR18	trip4	Thyroid hormone receptor interactor 4							F1Q883	pgd	6-phosphogluconate dehydrogenase, decarboxylating (EC 1.1.1.44)
A0A0R4IR19	nsmce1	Non-structural maintenance of chromosomes element 1 homolog (Fragment)							F1Q884	gnmt	Glycine N-methyltransferase (EC 2.1.1.20)
A0A0R4IR38	col4a3bpb	Collagen, type IV, alpha 3 (Goodpasture antigen)-binding protein b (Fragment)							F1Q890	plg	Plasminogen (EC 3.4.21.7)
F1R8J7	rai14	Retinoic acid-induced 14							F1Q8A5	hnrnpd	Heterogeneous nuclear ribonucleoprotein D
A0A0R4IR47									F1Q8B0	agr1	Ag1 (Anterior gradient 1)
A0A0R4IR49	si:ch211-165e15.1	Si:ch211-165e15.1							F1Q8D2	nsfl1c	NSFL1 (p97) cofactor (p47)
A0A0R4IR54	prp	Persistent plexus							F1Q8F0
A0A0R4IR56	lrch3	Leucine-rich repeats and calponin homology (CH) domain-containing 3							F1Q8J4	acadvl	Acyl-CoA dehydrogenase very long chain
A0A0R4IR57	itgb1b	Integrin beta							F1Q8J9	pkp3a pkp3	Plakophilin 3a
A0A0R4IR75	stt3a	STT3A, subunit of the oligosaccharyltransferase complex (catalytic)							F1Q8L0	mrpl46	Mitochondrial ribosomal protein L46
J9JI09	trioa si:dkey-158b13.2	Trio Rho guanine nucleotide exchange factor a							F1Q8M3	arfip1	ADP-ribosylation factor-interacting protein 1 (arfaptin 1)
A0A0R4IR82	pggt1b	Protein geranylgeranyltransferase type I, beta subunit (Fragment)							F1Q8N0	dhrs4 dhrs2	Dehydrogenase/reductase (SDR family) member 4
F1R617	myo1b myo1bl2	Myosin IB							F1Q8P7	eif2s2	Eukaryotic translation initiation factor 2, subunit 2 beta
A0A0R4IR98									F1Q8Q6	tkfc dak	Triokinase/FMN cyclase
A0A0R4IRA1									F1Q8R6
Q6NYZ0	dnajb11	DnaJ heat shock protein family (Hsp40) member B11 (Dnajb11 protein)							F1Q8S5	col4a1	Collagen, type IV, alpha 1 (Fragment)
A0A0R4IRA8	si:dkey-33b17.3	Si:dkey-33b17.3							F1Q8S6	lpcat2	Lysophosphatidylcholine acyltransferase 2
A0A0R4IRB5	gtf2b	General transcription factor IIB							F1Q8T3
Q5RGV0	impdh1b IMPDH	Inosine-5'-monophosphate dehydrogenase (IMP dehydrogenase) (IMPD) (IMPDH) (EC 1.1.1.205)							F1Q8T7
E7FBY9	tax1bp1b	Tax1-binding protein 1 homolog B							F1Q8W8	calr	Calreticulin
F1QYF0	tbl3	Transducin (beta)-like 3							F1Q8X5	fermt2	Fermitin family homolog 2 (Kindlin-2)
A0A0R4IRJ2	ppa2	Pyrophosphatase (inorganic) 2							F1Q8Y8
A0A0R4IRJ8	clic1	Chloride intracellular channel protein							F1Q8Z1	dock7	Dedicator of cytokinesis 7
Q4KMD2	exosc3 zgc:112345	Exosome component 3 (Zgc:112345)							F1Q924	col6a4a col6a6	Collagen, type VI, alpha 4a (Fragment)
F1QLZ8	slc27a4	Solute carrier family 27 member 4							F1Q953	nup155	Nucleoporin 155
A0A0R4IRM1	kif5ba	Kinesin-like protein							F1Q957
A0A0R4IRM6	fabp1b.2	Fatty acid-binding protein 1b, liver, tandem duplicate 2							F1Q986	hpdb	4-hydroxyphenylpyruvate dioxygenase
Q5XJS4									F1Q997	ap1m3	Adaptor-related protein complex 1 subunit mu 3
E7F290	si:ch211-222l21.1	Si:ch211-222l21.1							F1Q9A4	cox7a2a cox7a2	Cytochrome c oxidase subunit 7A2a
A0A0R4IRQ4	strn4	Striatin, calmodulin-binding protein 4							F1Q9C7	ufl1	E3 UFM1-protein ligase 1
A0A0R4IRR5	si:ch211-1i11.3	Si:ch211-1i11.3							F1Q9D1	alyref	Aly/REF export factor
A0A0R4IRS1	ap1m1	Adaptor-related protein complex 1 subunit mu 1							F1Q9D2	cpne3	Copine III
A0A0R4IRS4	pnkp	Polynucleotide kinase 3'-phosphatase							F1Q9F4	spp1	Secreted phosphoprotein 1
A0A0R4IVT5									F1Q9H9	mtor	Serine/threonine-protein kinase TOR (EC 2.7.11.1)
A0A0R4IRT6	mrps16	Mitochondrial ribosomal protein S16							F1Q9I7	snx1a snx1	Sorting nexin 1a
A0A0R4IRW0	hcn1	Hyperpolarization-activated cyclic nucleotide-gated potassium channel 1							F1Q9K1	smarcc1a	SWI/SNF-related, matrix-associated, actin-dependent regulator of chromatin, subfamily c, member 1a
E9QHT1	zgc:100868	Zgc:100868							F1Q9K4
F1QR96	coro2a	Coronin							F1Q9N0	apom	Apolipoprotein M (Fragment)
A0A0R4IRY8									F1Q9Q7	qkib si:ch73-47d4.1	Protein quaking-B (Fragment)
F1R680	smpd4	Sphingomyelin phosphodiesterase 4							F1Q9R1	anxa11b	Annexin
Q9PTF3	nme3 NDPK-Z3 ndpkz3	Nucleoside diphosphate kinase (EC 2.7.4.6)							F1Q9S3	zgc:66479	Zgc:66479
A0A0R4IS14	wu:fj29h11	Wu:fj29h11							F1Q9T9	rpl23a	Ribosomal protein L23a (Fragment)
A0A0R4IS22	zgc:66475	Zgc:66475							F1Q9U6	adssl	Adenylosuccinate synthetase (AMPSase) (AdSS) (EC 6.3.4.4) (IMP--aspartate ligase)
A0A0R4IS53	gapvd1	GTPase-activating protein and VPS9 domains 1							F1Q9Z1	si:ch211-202f3.3 im:7154842	Si:ch211-202f3.3 (Fragment)
A2BFY7	purba si:dkey-202n14.1	Purine-rich element-binding protein Ba (Si:dkey-202n14.1)							F1QA07	arhgef7b	Rho guanine nucleotide exchange factor (GEF) 7b
A0A0R4IS93									F1QA18	hesx1	HESX homeobox 1
A0A0R4ISA3	hsp90aa1.2	Heat shock protein 90, alpha (cytosolic), class A member 1, tandem duplicate 2							F1QA55	vrk1	Serine/threonine-protein kinase VRK1
A0A0R4ISC3	map1sa	Microtubule-associated protein 1Sa							F1QA97	dctn2	Dynactin subunit 2
A0A0R4ISD0	si:dkeyp-90h9.1	Si:dkeyp-90h9.1 (Fragment)							F1QAA3	zgc:153659	Zgc:153659
A0A0R4ISD2									F1QAA7	acss2	Acyl-CoA synthetase short chain family member 2
F1Q8G5	si:rp71-36a1.3	Si:rp71-36a1.3 (Fragment)							F1QAB2
A0A0R4ISE8	im:6912630	Im:6912630							F1QAF7	parp2	Poly [ADP-ribose] polymerase (PARP) (EC 2.4.2.-)
A0A0R4IWF2									F1QAF8	lrrc47	Leucine-rich repeat-containing 47 (Fragment)
B3DKP3	ogt.1 ogt	O-linked N-acetylglucosamine (GlcNAc) transferase (UDP-N-acetylglucosamine:polypeptide-N-acetylglucosaminyl transferase) (O-linked N-acetylglucosamine (GlcNAc) transferase, tandem duplicate 1)							F1QAH5	crybg1a	Crystallin beta-gamma domain-containing 1a
A0A0R4ITC8	spartb spg20b	Spartin b							F1QAH9
A0A0R4ISH5									F1QAJ7	slc25a3b	Solute carrier family 25 member 3b
Q1JPU9	abi2b zgc:136560	Abl-interactor 2b (Zgc:136560)							F1QAK4	si:dkey-174i8.1	Si:dkey-174i8.1
A0A0R4ISI6	galns	Galactosamine (N-acetyl)-6-sulfatase							F1QAK5	nt5c2b	5'-nucleotidase, cytosolic IIb
A0A0R4ISJ3	xrn2	5'-3' exoribonuclease (EC 3.1.13.-)							F1QAM5	slc29a1a	Solute carrier family 29 member 1a
A0A286Y813	map2k6	Dual-specificity mitogen-activated protein kinase kinase 6							F1QAM8	vim	Vimentin
E7F8N8	palm2	Paralemmin 2							F1QAP2	aprt	Adenine phosphoribosyltransferase
A0A0R4ISP9	si:ch1073-67j19.2	Si:ch1073-67j19.2							F1QAU9	wu:fi04e12	Wu:fi04e12
A0A0R4ISQ0									F1QAX8
A0A0R4IST0	zgc:66313	Alpha-amylase (EC 3.2.1.1)							F1QB08	baiap2a	BAI1-associated protein 2a
A0A0R4IST5									F1QB21	decr1	2,4-dienoyl CoA reductase 1, mitochondrial
Q6DEH7	nek7 CH211-51F18.3-001	NIMA (Never in mitosis gene a)-related kinase 7 (NIMA-related kinase 7) (Novel protein similar to vertebrate NIMA (Never in mitosis gene a)-related kinase 7 (NEK7))							F1QB35	strbp	Spermatid perinuclear RNA-binding protein
E7FAY9	phldb1b	Pleckstrin homology-like domain, family B, member 1b							F1QB47	eif5b	Eukaryotic translation initiation factor 5B
Q6P948	pdha1a pdha1	Pyruvate dehydrogenase E1 component subunit alpha (EC 1.2.4.1)							F1QB50	tmpob	Thymopoietin b
A0A0R4IT10	add1	Adducin 1 (alpha) (Fragment)							F1QB53	kpna1	Karyopherin alpha 1 (importin alpha 5) (Fragment)
F1QVR2									F1QB54	pabpc1a	Polyadenylate-binding protein (PABP)
A0A0R4IT32	sult2st2	Sulfotransferase (EC 2.8.2.-)							F1QB82	sts	Steroid sulfatase (microsomal), isozyme S
A0A0R4IT69	dctn4	Dynactin 4							F1QB90	tp53rk	TP53-regulating kinase
A0A0R4IWB7									F1QBB1	caspbl si:ch211-15j1.6	Caspase b,-like
A0A0R4ITA8	pfkpa	ATP-dependent 6-phosphofructokinase (ATP-PFK) (Phosphofructokinase) (EC 2.7.1.11) (Phosphohexokinase)							F1QBB3
A0A0R4ITB0	hip1rb	Huntingtin-interacting protein 1-related b (Fragment)							F1QBC0	plxnb2a	Plexin b2a
A0A0R4ITB1									F1QBE9	ccl25b	Chemokine (C-C motif) ligand 25b
Q5XJQ5	exosc9	Exosome complex component RRP45 (Exosome component 9)							F1QBH0	olfml3a	Olfactomedin-like protein 3A
A0A0R4ITD6									F1QBM2	pdcd4a	Programmed cell death 4a
A0A0R4ITF1									F1QBQ6	zgc:56585	Zgc:56585
A0A0R4ITF3									F1QBS1	si:dkey-156n14.5	Si:dkey-156n14.5
F8W5V6	zgc:173915	Zgc:173915 (Fragment)							F1QBS7	sult2st1	Sulfotransferase (EC 2.8.2.-)
A0A0R4ITH7	pargl	Poly (ADP-ribose) glycohydrolase,-like							F1QBU3
A0A0R4ITI3									F1QBW7	eno3 ENO1	Enolase 1, (Alpha) (Enolase 3, (beta, muscle))
A0A0R4ITI5	hnrnpr	Heterogeneous nuclear ribonucleoprotein R							F1QBW8	zgc:194398	Zgc:194398
Q5I2A9	itga5	Integrin alpha5 (Integrin, alpha 5 (fibronectin receptor, alpha polypeptide))							F1QBZ6	gsto2	Glutathione S-transferase omega 2
A0A0R4ITK3									F1QC03	zyx	Zyxin
A0A0R4ITK8									F1QC05	ephx1	Epoxide hydrolase (EC 3.3.2.9)
A0A0R4ITL7	cib1	Calcium and integrin-binding 1 (calmyrin)							F1QC06	itga2.2 si:dkey-27b3.9	Integrin, alpha 2 (CD49B, alpha 2 subunit of VLA-2 receptor), tandem duplicate 2
A0A0R4ITL8	fundc2	Fun14 domain-containing 2							F1QC13	pacsin2	Protein kinase C and casein kinase substrate in neurons 2
A0A0R4ITN2	gc	Gc, vitamin D-binding protein							F1QC34	rpn2	Ribophorin II
A0A0R4ITP0									F1QC84	f13a1a.1	Coagulation factor XIII, A1 polypeptide a, tandem duplicate 1
A0A0R4ITP2	atxn3	Ataxin 3							F1QCD4	got2b	Aspartate aminotransferase (EC 2.6.1.1)
Q561S5	znhit1 zgc:112524	Zgc:112524 (Zinc finger, HIT-type-containing 1)							F1QCE3	prdx5	Peroxiredoxin (EC 1.11.1.15)
A0A0R4ITT6									F1QCE9	ndufab1b ndufab1	Acyl carrier protein
A0A0R4ITT8									F1QCG5
A0A0R4ITV7	si:dkey-183i3.5	Si:dkey-183i3.5							F1QCK5	abi3b	ABI family, member 3b
A0A0R4ITX1	agap1	ArfGAP with GTPase domain, ankyrin repeat and PH domain 1							F1QCQ7	stom	Stomatin
A0A0R4ITX9	cygb1	Cytoglobin-1							F1QCR7	nefma	Neurofilament, medium polypeptide a
A0A0R4ITY1	ciz1a	Cdkn1a-interacting zinc finger protein 1a							F1QCT6	plaa	Phospholipase A2-activating protein
A0A0R4ITZ7	exosc7	Exosome component 7							F1QCU3
F1QDE7	pds5a	Sister chromatid cohesion protein PDS5 homolog A							F1QCU8
B8A4T4	nfixa	Nuclear factor I/Xa							F1QCV2	hdac10	Polyamine deacetylase HDAC10 (EC 3.5.1.48) (EC 3.5.1.62) (Histone deacetylase 10)
A0A0R4IU19	si:ch211-93f2.1	Si:ch211-93f2.1 (Fragment)							F1QCV3
A0A0R4IU21	si:ch211-204c21.1	Si:ch211-204c21.1							F1QCW3	si:ch211-107o10.3	Si:ch211-107o10.3
A0A0R4IU34	emsy	BRCA2-interacting transcriptional repressor EMSY							F1QD04	ptpn1	Protein tyrosine phosphatase, non-receptor type 1
A0A0R4IU41	lrrc45	Leucine-rich repeat-containing 45							F1QD15	ptgfrn	Uncharacterized protein
A9JT13	thoc6	THO complex 6 homolog (Drosophila) (THO complex subunit 6 homolog)							F1QD17
A0A0R4IU56	dph5	Diphthamide biosynthesis 5							F1QD61	mtrex skiv2l2	Mtr4 exosome RNA helicase
Q803E3	ewsr1b	EWS RNA-binding protein 1b (Ewing sarcoma breakpoint region 1b)							F1QD77
A0A0R4IUA6	dock1	Dedicator of cytokinesis 1							F1QDA2	napsa	Zgc:63831
A0A0R4IUB5	srsf11	Serine and arginine-rich-splicing factor 11							F1QDB6	ppa2	Pyrophosphatase (inorganic) 2
A0A0R4IUB6	epn1	Epsin 1							F1QDD9	gfpt1	Glutamine--fructose-6-phosphate transaminase 1 (Glutamine-fructose-6-phosphate transaminase 1)
A0A0R4IUB7	metap2b METAP2	Methionine aminopeptidase 2 (MAP 2) (MetAP 2) (EC 3.4.11.18) (Initiation factor 2-associated 67 kDa glycoprotein) (Peptidase M) (p67) (p67eIF2)							F1QDJ9	srp72	Signal recognition particle subunit SRP72
A0A0R4IUE2	ndufv3	NADH:ubiquinone oxidoreductase subunit V3							F1QDL1	col1a1b	Collagen, type I, alpha 1b
A0A0R4IUF4	prkd2	Protein kinase D2 (Fragment)							F1QDM6	hspe1	Heat shock 10 protein 1
A0A0R4IUG5									F1QDQ1	copa	Coatomer subunit alpha
B8A4B0									F1QDQ5	manf	Mesencephalic astrocyte-derived neurotrophic factor
A0A0R4IUH0	ccz1	Vacuolar fusion protein CCZ1 homolog							F1QDZ4	tyr	Tyrosinase
A0A0R4IUH9									F1QE09	spag7	Sperm-associated antigen 7 homolog
A0A0R4IUJ5	nagk	N-acetylglucosamine kinase							F1QE13	exoc8	Exocyst complex component 8
A0A0R4IUL0	si:ch73-199g24.2	Peptidylprolyl isomerase (EC 5.2.1.8)							F1QE25	naa15a	N(alpha)-acetyltransferase 15, NatA auxiliary subunit a
Q4V9P8	camk2g1 camk2ga	Calcium/calmodulin-dependent protein kinase (CaM kinase) II gamma 1							F1QE31	psme4b	Proteasome activator complex subunit 4B
A0A0R4IUN0									F1QE37	sirt2	NAD-dependent protein deacetylase (EC 3.5.1.-)
A0A0R4IUQ5	csnk1g1	Casein kinase I isoform gamma-1							F1QE62	hibadhb	3-hydroxyisobutyrate dehydrogenase (HIBADH) (EC 1.1.1.31)
A9JRG9									F1QE65	cyfip1	Cytoplasmic FMR1-interacting protein
A0A0R4IUQ9	ilf3b	Interleukin enhancer-binding factor 3b							F1QE70
A0A286YA50									F1QE89	aldh5a1	Aldehyde dehydrogenase 5 family, member A1 (succinate-semialdehyde dehydrogenase)
E9QB27	nap1l4b	Nucleosome assembly protein 1-like 4b (Fragment)							F1QEB3	actr3	Actin-related protein 3
A2BHM9	bmp2k	BMP2-inducible kinase							F1QEB4	ssrp1a	FACT complex subunit SSRP1
A0A0R4IUS4	flnca	Filamin C, gamma a (actin-binding protein 280)							F1QEC9	tyrp1a	Tyrosinase-related protein 1a
A0A0R4IUT0	btr20	Bloodthirsty-related gene family, member 20							F1QEJ3	ephb1	EPH receptor B1
A0A0R4IUT1	si:dkey-71l4.3	Si:dkey-71l4.3							F1QEJ5	uqcrq	Ubiquinol-cytochrome c reductase, complex III subunit VII
B0V2G3									F1QEJ6	rab3gap2	RAB3 GTPase-activating protein subunit 2 (non-catalytic)
A0A0R4IUT5									F1QEK8
A0A0R4IUT6									F1QEL8
A0A0R4IUU4	si:ch1073-205c8.3	Si:ch1073-205c8.3							F1QEN3
A0A0R4IUV0	top1mt	DNA topoisomerase I mitochondrial							F1QEQ3	dap1b	Death-associated protein 1b
A0A0R4IUV1									F1QEQ6
A0A0R4IUW3	si:dkey-171c9.3	Si:dkey-171c9.3							F1QET7	fscn1a fscn1	Fascin
A0A0R4IUZ0	lztfl1	Leucine zipper transcription factor-like 1							F1QEV3	hsd3b7	Hydroxy-delta-5-steroid dehydrogenase, 3 beta- and steroid delta-isomerase
Q503Z0	tpd52l1 zgc:110003	Tpd52-like 1 (Zgc:110003) (Zgc:110003 protein)							F1QEW2	si:dkey-183i3.5	Si:dkey-183i3.5
A0A0R4IV07	zgc:153293	Zgc:153293							F1QEW3	kpna4	Importin subunit alpha
F1R6C8									F1QEW4	flot1a	Flotillin 1a
A0A0R4IV43	rbfox1	RNA binding protein fox-1 homolog							F1QEY8	phgdh	D-3-phosphoglycerate dehydrogenase (EC 1.1.1.95)
E7FD66									F1QF00	pgm1	Phosphoglucomutase 1
A0A0R4IV55	si:dkeyp-80d11.14	Si:dkeyp-80d11.14							F1QF15	actr2a	Actin-related protein 2
F1QBH7	nfic	Nuclear factor 1							F1QF68	ppwd1	Peptidylprolyl isomerase domain and WD repeat-containing 1
A0A0R4IVA0	s100w	S100 calcium-binding protein W							F1QF82
A0A0R4IVA6	plcb3	1-phosphatidylinositol 4,5-bisphosphate phosphodiesterase (EC 3.1.4.11)							F1QF86	ppp3ccb	Serine/threonine-protein phosphatase (EC 3.1.3.16)
A0A0R4IVC0	hnrnpl2	Heterogeneous nuclear ribonucleoprotein L2							F1QF98	rbm19	RNA-binding motif protein 19
A0A0R4IVC8	cox5ab	Cytochrome c oxidase subunit 5Ab							F1QFA6	cnot1	CCR4-NOT transcription complex subunit 1
A0A0R4IVD5	erlec1	Endoplasmic reticulum lectin 1							F1QFC0	hspa9	Heat shock protein 9
A0A0R4IVE2	usp10	Ubiquitin-specific peptidase 10							F1QFG2	papss2a	3'-phosphoadenosine 5'-phosphosulfate synthase 2a
A0A0R4IVF2	si:ch211-1a19.3	Si:ch211-1a19.3							F1QFI2	cux1b	Cut-like homeobox 1b (Fragment)
A0A0R4IVF6	ndufc2	NADH dehydrogenase [ubiquinone] 1 subunit C2							F1QFJ8	hnrnph1l	Heterogeneous nuclear ribonucleoprotein H1,-like
A0A0R4IVH3	cfap20	Cilia- and flagella-associated protein 20							F1QFK9	cstf1	Cleavage stimulation factor, 3' pre-RNA, subunit 1
F1QHW0	cyp20a1	Cytochrome P450, family 20, subfamily A, polypeptide 1							F1QFM1
A0A0R4IVM0	coq4 COQ4	Ubiquinone biosynthesis protein COQ4 homolog, mitochondrial (Coenzyme Q biosynthesis protein 4 homolog)							F1QFN3	larsb	Leucyl-tRNA synthetase b
Q6P0B2	lsm14ab zgc:77202	C19orf13-like protein (LSM14A mRNA-processing body assembly factor b) (Zgc:77202)							F1QFP1	copz1	Coatomer protein complex, subunit zeta 1
A0A0R4IVS5	man2a1	Alpha-mannosidase (EC 3.2.1.-)							F1QFQ6	dlst	Dihydrolipoamide S-succinyltransferase
D7PS91	frem2a	Fras1-like extracellular matrix protein 2a (Fras1-related extracellular matrix protein 2a)							F1QFQ7	acadsb	Acyl-CoA dehydrogenase short/branched chain
A0A0R4IVU1	mafk	V-maf avian musculoaponeurotic fibrosarcoma oncogene homolog K							F1QFS5
A0A0R4IVU8	im:7150988	Im:7150988							F1QFV2	hnrnpa1b hnrnpa1	Heterogeneous nuclear ribonucleoprotein A1b
A0A0R4IVV5	fdft1	Farnesyl-diphosphate farnesyltransferase 1							F1QFV6	rpl28	Ribosomal protein L28
A0A0R4IVV9	si:dkey-238k10.3	Si:dkey-238k10.3							F1QFW3
A0A0R4IVW4	zgc:101723	Zgc:101723							F1QG05
A0A0R4IVW9	si:ch73-158p21.3	Si:ch73-158p21.3							F1QG30	smpd5 smpdm zgc:153995	Sphingomyelin phosphodiesterase 5 (EC 3.1.4.12) (Mitochondrial neutral sphingomyelinase) (mtnSMase)
F1QTT2									F1QG52	zgc:113307	Zgc:113307
A0A0R4IVY2	igf2bp2b	Insulin-like growth factor 2 mRNA-binding protein 2b							F1QG80	rpl22	Ribosomal protein L22
E7F9X9									F1QGE7	si:ch211-196h16.4	Si:ch211-196h16.4 (Fragment)
A0A0R4IVY7									F1QGF2	zgc:162193	Zgc:162193
A0A0R4IVZ0	nup153	Nucleoporin 153							F1QGG3	nsfb	N-ethylmaleimide-sensitive factor b
A0A0R4IVZ2									F1QGH7	ctnnb1	Catenin beta-1 (Beta-catenin)
A0A0R4IW14									F1QGH8	sh3glb1a	SH3-domain GRB2-like endophilin B1a
A0A0R4IW20									F1QGH9	psmd11b	26S proteasome non-ATPase regulatory subunit 11B (26S proteasome regulatory subunit RPN6-B)
F1RDR3	fcho2	F-BAR domain only protein 2							F1QGJ3	zgc:77486	Perilipin
A0A0R4IW28	sdad1	Protein SDA1 (Fragment)							F1QGP1	aldh16a1	Aldehyde dehydrogenase 16 family, member A1
E7F8C7	baiap2l1a	BAI1-associated protein 2-like 1a							F1QGQ0	vbp1	Prefoldin subunit 3
A0A0R4IW43	cog3	Component of oligomeric golgi complex 3							F1QGS9	gusb	Beta-glucuronidase (EC 3.2.1.31)
A0A0R4IW47	col5a3a	Collagen, type V, alpha 3a							F1QGW6	eif2s3	Eukaryotic translation initiation factor 2 subunit 3 (Eukaryotic translation initiation factor 2 subunit gamma) (eIF-2-gamma)
A0A0R4IW64									F1QGY3	wbp2nl wbp2	WBP2 N-terminal-like (WW domain binding protein 2)
A0A0R4IW75	mtmr12	Myotubularin-related protein 12							F1QH12	acaca	Acetyl-CoA carboxylase alpha
F1QZ04									F1QH31	zgc:153284	Zgc:153284
Q7SY38	ndrg3a	N-myc downstream regulated family member 3a (Ndrg family member 3a)							F1QH34
Q7ZVR3	ppp1cab zgc:76940	Serine/threonine-protein phosphatase (EC 3.1.3.16)							F1QH65
A0A0R4IW96	aip	Peptidylprolyl isomerase (EC 5.2.1.8)							F1QH80
A0A0R4IWA5	elp5	Elongator complex protein 5							F1QH84
A0A0R4IWE1	fahd2a	Fumarylacetoacetate hydrolase domain-containing 2A							F1QH99	acp1	Acid phosphatase 1
A0A0R4IWJ5									F1QHC4	lmnb1	Lamin B1
A0A0R4IWL6	pum1	Pumilio RNA-binding family member 1							F1QHC8	tnmd	Tenomodulin
A0A0R4IWM3	gak	Cyclin G-associated kinase							F1QHE5	psmd14	Proteasome 26S subunit, non-ATPase 14
A0A0R4IWM4	zc3h7a	Zinc finger CCCH-type-containing 7A							F1QHE9	ndufs7	NADH:ubiquinone oxidoreductase core subunit S7
A0A0R4IWN8	si:ch73-281n10.2	Si:ch73-281n10.2							F1QHG2	zgc:101810	Zgc:101810
A0A0R4IWP2	ivns1abpb	Influenza virus NS1A-binding protein homolog B							F1QHG3	zgc:173729	Zgc:173729
A0A0R4IWQ4	coq10b	Coenzyme Q-binding protein COQ10 homolog B, mitochondrial							F1QHJ3	gna13b	Guanine nucleotide-binding protein (G protein), alpha 13b
A0A0R4IWQ8	hmg20b	High mobility group 20B							F1QHJ4	dap	Death-associated protein
A0A0R4IWR0	zgc:112433	Zgc:112433							F1QHJ6
A0A0R4IWR3	dnajc21	DnaJ homolog subfamily C member 21							F1QHK0	pgm3	Phosphoacetylglucosamine mutase (PAGM) (EC 5.4.2.3) (Acetylglucosamine phosphomutase) (N-acetylglucosamine-phosphate mutase)
G1K2S6	narfl	Cytosolic Fe-S cluster assembly factor narfl							F1QHQ4	wdr11	WD repeat-containing protein 11
E9QIM2	sod3b	Superoxide dismutase [Cu-Zn] (EC 1.15.1.1)							F1QHR0	apoa4b.1	Apolipoprotein A-IV b, tandem duplicate 1
A0A0R4IZA4									F1QHT0	pou2f2a	POU domain protein
A0A0R4IWU5	fcer1gl	Fc receptor, IgE, high affinity I, gamma polypeptide-like							F1QHT9	ddx19	DEAD/H (Asp-Glu-Ala-Asp/His) box polypeptide 19 (DBP5 homolog, yeast)
F1RDC5	xpo7	Exportin 7							F1QHW0	cyp20a1	Cytochrome P450, family 20, subfamily A, polypeptide 1
A0A0R4IWU8	si:dkey-73n8.3	Si:dkey-73n8.3							F1QHY3	birc6	Baculoviral IAP repeat-containing 6
F1R6D2	gpt2	Glutamic pyruvate transaminase (alanine aminotransferase) 2							F1QHZ1	rad23aa	RAD23 homolog A, nucleotide excision repair protein a
Q7T2E9	tmed5	Transmembrane emp24 protein transport domain containing 5 (Transmembrane p24-trafficking protein 5)							F1QI59	ppp1cb	Serine/threonine-protein phosphatase (EC 3.1.3.16)
A0A0R4IXH8	thrap3b	Thyroid hormone receptor-associated protein 3b (Fragment)							F1QI68	nt5c1bb	5'-nucleotidase, cytosolic IB b
Q05AJ1	larp4b zgc:153918	La ribonucleoprotein domain family, member 4B (Zgc:153918)							F1QI70
A0A0R4IWY5	sept9a	Septin 9a							F1QI74	eef1a1b eef1a1l2 zgc:110335	Elongation factor 1-alpha
A0A0R4IWZ6	si:dkey-14o6.1	Si:dkey-14o6.1 (Fragment)							F1QI82
A0A0R4IX15	tmem119a	Transmembrane protein 119a							F1QI99	srp68	Signal recognition particle subunit SRP68 (SRP68)
A2CES1	zzef1	Zinc finger, ZZ-type with EF hand domain 1							F1QIC0	cbsb	Cystathionine beta-synthase (EC 4.2.1.22)
A0A0R4IX41	meaf6	Chromatin modification-related protein MEAF6							F1QIC4	phactr4a	Phosphatase and actin regulator 4A
F1QF19	hectd3	HECT domain-containing 3							F1QIF5
A0A0R4IX64	si:ch73-132f6.5	Si:ch73-132f6.5							F1QII6	zgc:171509	Zgc:171509
A0A0R4IX73	rasgrf2b	Ras protein-specific guanine nucleotide-releasing factor 2b							F1QII8	eif3k EIF3K EIF3S12	Eukaryotic translation initiation factor 3 subunit K (eIF3k) (Eukaryotic translation initiation factor 3 subunit 12) (eIF-3 p25)
F1QXK3	acox3	Acyl-coenzyme A oxidase							F1QIJ3	lamc2	Laminin, gamma 2
A0A0R4IX92									F1QIJ6	eps15 si:ch73-22b20.2	Epidermal growth factor receptor pathway substrate 15
B8JID6	dock5	Dedicator of cytokinesis 5							F1QIL6	acad9	Acyl-CoA dehydrogenase family, member 9
A0A0R4IXB6									F1QIQ2	bag6	BCL2-associated athanogene 6
A0A0R4IXC2	sept9b	Septin 9b							F1QIU5	mcamb	Melanoma cell adhesion molecule b
F1QHR3	uck1	Uridine-cytidine kinase (EC 2.7.1.48)							F1QJ11
A0A0R4IXC8	tubb6	Tubulin beta chain							F1QJ18	nup205	Nucleoporin 205
A0A0R4IXD0									F1QJ44	zgc:56304	Zgc:56304 (Zgc:56304 protein)
B8JIA7	eif4eb	Eukaryotic translation initiation factor 4eb							F1QJ75	cyb5r1	NADH-cytochrome b5 reductase (EC 1.6.2.2)
A0A0R4IXD8	dync1i2b	Dynein, cytoplasmic 1, intermediate chain 2b							F1QJ77	rabggta	Rab geranylgeranyltransferase subunit alpha
A0A0R4IXD9	tbcd	Tubulin folding cofactor D							F1QJ99
A0A0R4IXF0	fadd	Fas (tnfrsf6)-associated via death domain							F1QJA6
A0A0R4IXF1	gnl2	Nucleolar GTP-binding protein 2							F1QJB4
A0A0R4IXF5	zgc:92161	Zgc:92161							F1QJB5	bin2b	Bridging integrator 2b
Q4VBK1	atg4a zgc:111958	Cysteine protease (EC 3.4.22.-)							F1QJC1	dhrs9	Dehydrogenase/reductase (SDR family) member 9
A0A0R4IXK0									F1QJD1	apoa4b.2	Apolipoprotein A-IV b, tandem duplicate 2
A0A0R4IXL0	polr2b	DNA-directed RNA polymerase subunit beta (EC 2.7.7.6)							F1QJE0	uqcrc2a	Ubiquinol-cytochrome c reductase core protein 2a
A0A0R4IXL2	pank4	Pantothenate kinase 4 (Fragment)							F1QJE5	ppm1g	Protein phosphatase, Mg2+/Mn2+-dependent, 1G
A0A0R4IXL8									F1QJI7
Q6DHQ0									F1QJK0	myo1eb	Myosin IE, b
A0A0R4IXN5	si:ch211-69b7.6	Si:ch211-69b7.6							F1QJK2	sept8a	Septin-8-A
F1QB11	ildr2	Immunoglobulin-like domain-containing receptor 2 (Fragment)							F1QJK4	myh9b	Myosin, heavy chain 9b, non-muscle (Fragment)
B3DIV2									F1QJM2
A0A0R4IXT6	cog1	Component of oligomeric golgi complex 1							F1QJN5
F1QR34									F1QJR6	tm9sf5	Transmembrane 9 superfamily member
A0A0R4IXW8									F1QJU0	wu:fc21g02	Wu:fc21g02
A0A0R4IXX6	cfhl1	Complement factor H-like 1							F1QJV7	ddt	D-dopachrome tautomerase
A0A0R4IXY0	gcdhb	Glutaryl-CoA dehydrogenase b							F1QJX7	gnas	GNAS complex locus
A0A0R4IXZ5									F1QJY4	trim35-28	Tripartite motif-containing 35-28
A0A0R4IXZ9									F1QJZ3	agmat	Agmatine ureohydrolase (agmatinase)
A0A0R4IY00	mrpl3	Mitochondrial ribosomal protein L3							F1QJZ6	tmod2	Tropomodulin 2
A0A0R4IY03									F1QK40
A0A0R4IY13	si:ch1073-416d2.3	Si:ch1073-416d2.3							F1QK53
A0A0R4IY34	nudcd3	NudC domain-containing 3							F1QK60	krt4	Keratin 4
A0A0R4IY42									F1QK92	uqcc1 uqcc	Ubiquinol-cytochrome c reductase complex assembly factor 1
A0A0R4IY96	ints5	Integrator complex subunit 5							F1QK93	psmd1	26S proteasome non-ATPase regulatory subunit 1
G1K2I2									F1QKC0	smu1a smu1	SMU1, DNA replication regulator and spliceosomal factor a
B0R118	pacsin3	Protein kinase C and casein kinase substrate in neurons 3							F1QKE8	col6a3	Collagen, type VI, alpha 3 (Fragment)
E7FD56	naa25 si:ch73-149o12.1	N(alpha)-acetyltransferase 25, NatB auxiliary subunit							F1QKF2	atp2b4	Calcium-transporting ATPase (EC 7.2.2.10)
A0A0R4IYC4									F1QKF9
A0A0R4IYD0	rps27l	40S ribosomal protein S27							F1QKH2	dmgdh	Dimethylglycine dehydrogenase
A0A0R4IYD1	soul3	Heme-binding protein soul3							F1QKH3	zgc:171967	Zgc:171967 (Zgc:171967 protein)
A0A0R4IYE2									F1QKK8	si:ch1073-459j12.1	Si:ch1073-459j12.1
F1R814	slitrk4	SLIT and NTRK-like family, member 4							F1QKL1	thbs3a	Thrombospondin-3a
A0A0R4IYH3	dnajb1a	DnaJ heat shock protein family (Hsp40) member B1a							F1QKN4
F1Q8Z1	dock7	Dedicator of cytokinesis 7							F1QKQ2	col7a1l	Collagen type VII alpha 1-like (Fragment)
A0A0R4IYH7									F1QKS0	myo5b	Myosin VB
F1QDW0	lnpk lnpb	Lunapark, ER junction formation factor							F1QKS4	canx	Calnexin
A0A0R4IYJ8									F1QKV7	si:ch211-242b18.1	Si:ch211-242b18.1
A0A0R4IYJ9									F1QKW3	lama5	Laminin, alpha 5
F1Q7E3									F1QKX8	lamb2l	Laminin, beta 2-like (Fragment)
Q7T1D7	fmo5	Dimethylaniline monooxygenase [N-oxide-forming] (EC 1.14.13.8)							F1QL05	pcmtl	Protein-L-isoaspartate O-methyltransferase (EC 2.1.1.77)
A0A0R4IYM7									F1QL34	nudt9	Nudix (nucleoside diphosphate-linked moiety X)-type motif 9
A0A0R4IYQ3									F1QL40
F1R9P3	ttc38	Tetratricopeptide repeat protein 38 (Fragment)							F1QL66	capn12 si:ch211-160d20.1	Calpain 12
A0A0R4IYR2	nsdhl	NAD(P)-dependent steroid dehydrogenase-like							F1QL87
A0A0R4IYR7	mrps2	Mitochondrial ribosomal protein S2							F1QLC5	sf3b2 zgc:136773	Splicing factor 3b, subunit 2 (Zgc:136773 protein)
A0A0R4IYS1									F1QLH9	nucb1	Nucleobindin 1
A0A0R4IYT0	igf2bp3	Insulin-like growth factor 2 mRNA-binding protein 3							F1QLQ9
A0A0R4IYT8	si:ch211-71n6.4	Carboxylic ester hydrolase (EC 3.1.1.-)							F1QLS1
A0A0R4IYX1	adka	Adenosine kinase a							F1QLS7	ppcs	Phosphopantothenoylcysteine synthetase
A0A286Y976									F1QLT9	rars	Arginyl-tRNA synthetase
B0S739	si:dkey-4e7.3	Si:dkey-4e7.3							F1QLV0
A0A0R4IYZ8	baiap2b	BAI1-associated protein 2b							F1QLW3	pir	Pirin
A0A0R4IZ33	tollip	Toll-interacting protein							F1QLW6	ognb	Osteoglycin, paralog b
A0A0R4IZ89	si:ch211-212k18.4	Si:ch211-212k18.4							F1QM39	uacab	Uveal autoantigen with coiled-coil domains and ankyrin repeats b
F1R5K7	hspg2	Heparan sulfate proteoglycan 2							F1QM41	tbc1d17	TBC1 domain family, member 17
A3KNL3	pcyt1ba pcyt1b	Pcyt1b protein (Phosphate cytidylyltransferase 1, choline, beta a)							F1QM42	aco1	Aconitase 1, soluble
A0A0R4IZE3	hnrnph1	Heterogeneous nuclear ribonucleoprotein H1							F1QM43	hddc3	Guanosine-3',5'-bis(diphosphate) 3'-pyrophosphohydrolase MESH1
A0A0R4IZE4	vaspa	Vasodilator-stimulated phosphoprotein a							F1QM86	cbx1a	Chromobox homolog 1a (HP1 beta homolog Drosophila)
F1QI95	slc9a7	Sodium/hydrogen exchanger							F1QM90	gc	Gc, vitamin D-binding protein
A0A0R4IZG6	ptbp2a	Polypyrimidine tract-binding protein 2a							F1QM98	znf281b	Zinc finger protein 281b
A0A0R4IZJ5	zfpl1	Zinc finger protein-like 1							F1QMC3	sept7b	Septin 7b
A0A0R4IZK0	racgap1	Rac GTPase-activating protein 1							F1QMC6	got1	Glutamic-oxaloacetic transaminase 1, soluble (Fragment)
Q7T2P8									F1QMF9	nedd8 nedd8l	Neural precursor cell-expressed, developmentally down-regulated 8
Q3B752	dtymk zgc:123174	Deoxythymidylate kinase (thymidylate kinase) (Zgc:123174)							F1QMG9	si:dkey-21e2.8	Si:dkey-21e2.8 (Fragment)
A0A0R4IZR5	stag2b	Stromal antigen 2b							F1QML8	akap8l	A kinase (PRKA) anchor protein 8-like (Fragment)
A0A0R4IZT1									F1QMM7	atr	ATR serine/threonine kinase
A0A0R4IZT6	ppp1cc	Serine/threonine-protein phosphatase (EC 3.1.3.16)							F1QMY2	lbr	Lamin B receptor
F1QNG7	npc1	Niemann-Pick disease, type C1							F1QN02
A0A286YAN2									F1QN09	trim108	Tripartite motif-containing 108
A0A0R4J8E6	prpf8	Pre-mRNA-processing factor 8							F1QN42	si:dkey-240h12.4	Si:dkey-240h12.4
A0A140LFQ9	fhl1a	Four and a half LIM domains 1a							F1QN72	gsto1	Glutathione S-transferase omega 1
A0A140LFR4									F1QN76	rpl18	Ribosomal protein L18 (Fragment)
A0A140LFS6	si:dkey-187j14.8	Si:dkey-187j14.8							F1QN85
F1Q669	dusp19b	Dual-specificity phosphatase 19b							F1QNB3	ank3a	Ankyrin 3a
A0A140LFW6	si:ch1073-365p7.2	Si:ch1073-365p7.2							F1QNF2	cbx3a	Chromobox homolog 3a (HP1 gamma homolog, Drosophila)
A0A140LFW7									F1QNI2	crlf3	Cytokine receptor-like factor 3
A0A140LH63	si:ch73-368j24.12	Si:ch73-368j24.12							F1QNJ3	tes	Testis-derived transcript (3 LIM domains)
A0A140LFZ6	rbms2a	RNA-binding motif, single stranded-interacting protein 2a (Fragment)							F1QNJ5
A0A140LG01	myg1	Melanocyte proliferating gene 1							F1QNK8	hyi	Putative hydroxypyruvate isomerase (EC 5.3.1.22)
A0A140LG11	si:dkey-56m19.5	Si:dkey-56m19.5							F1QNQ9
A0A140LG21	snrpe	Small nuclear ribonucleoprotein E (snRNP-E) (Sm protein E)							F1QNR8	ireb2	Iron-responsive element-binding protein 2
A0A140LG23	si:dkey-23a13.21	Histone H3							F1QNS0
A0A140LG29	si:dkey-172h23.2	Si:dkey-172h23.2							F1QNV4	nup133	Nucleoporin 133
A0A140LG40									F1QNX9	smfn	Small fragment nuclease
A0A140LG55									F1QNY5	cpne1	Copine I
A0A140LG82									F1QP28	krt96	Keratin 96 (Fragment)
A0A140LG86	fgl1	Fibrinogen-like 1							F1QP35	si:dkey-222h21.3	Si:dkey-222h21.3 (Fragment)
A0A140LG97									F1QP64	sf1	Splicing factor 1
A0A140LGB0									F1QP68
A0A140LGC3	si:ch211-276i12.11	Si:ch211-276i12.11							F1QP73
E9QD20	rnaseh2c	Ribonuclease H2, subunit C							F1QP79	noc2l	NOC2-like nucleolar-associated transcriptional repressor
A0A140LGH0	tnmd	Tenomodulin (Fragment)							F1QP99	zgc:77086	Protein disulfide-isomerase (EC 5.3.4.1)
A0A140LGJ2									F1QPC1	cyp3c1	Cytochrome P450, family 3, subfamily c, polypeptide 1
A0A140LGL3	utrn	Utrophin							F1QPE4	sra1	Steroid receptor RNA activator 1
A0A140LGL5	fndc3a	Fibronectin type III domain-containing 3A							F1QPF0	erbin erbb2ip	Erbb2-interacting protein
A0A140LGM4	macrod2	Mono-ADP ribosylhydrolase 2							F1QPF7	cth	Cystathionase (cystathionine gamma-lyase)
A0A140LGM6									F1QPJ6	zgc:152830	Zgc:152830
A0A140LGN9	eif4g3a	Eukaryotic translation initiation factor 4 gamma, 3a							F1QPL7	pcca	Propionyl-CoA carboxylase subunit alpha (Fragment)
A0A140LGQ4	mmgt1	Membrane magnesium transporter 1							F1QPP5	pcid2	PCI domain-containing protein 2
A0A140LGS3	jac1 si:dkeyp-32g11.7	Jacalin 1							F1QPQ4	diaph2	Diaphanous-related formin 2
A0A140LH94									F1QPT3	gmds	GDP-mannose 4,6-dehydratase
A0A140LGU1	hp1bp3	Heterochromatin protein 1,-binding protein 3							F1QPU3	adhfe1	Alcohol dehydrogenase, iron-containing, 1 (Fragment)
A0A140LGU7									F1QPV5
A0A140LGV0									F1QPW1
A0A140LGY3	si:cabz01100188.1	Si:cabz01100188.1 (Fragment)							F1QPX6	zgc:152830	Zgc:152830 (Fragment)
A0A140LGZ1	si:ch1073-153i20.4	Si:ch1073-153i20.4							F1QQ04	serpinh1b hsp47	Serpin peptidase inhibitor, clade H (heat shock protein 47), member 1b
A0A140LH07	strc si:cabz01059983.1	Stereocilin							F1QQ16
A0A140LH10	si:ch73-234b20.5	Si:ch73-234b20.5							F1QQ30	serpinh2	Serine (or cysteine) peptidase inhibitor, clade H, member 2
A0A140LH34	si:ch1073-159d7.7	Si:ch1073-159d7.7							F1QQ88
A0A140LH15	si:dkey-88n24.11	Si:dkey-88n24.11							F1QQD3	cab39l1	Calcium-binding protein 39,-like 1
A0A140LH60	si:dkeyp-32g11.8	Si:dkeyp-32g11.8							F1QQE3
A0A140LH79	map7d3	MAP7 domain-containing 3							F1QQE6
A0A140LH86	yif1a	Protein YIF1A (Fragment)							F1QQG8	tnikb	TRAF2 and NCK-interacting kinase b
A0A140LH96	si:ch211-113d11.5	Si:ch211-113d11.5							F1QQI6	tomm70a	Translocase of outer mitochondrial membrane 70 homolog A (S. cerevisiae)
F1R9H7	si:ch211-194p6.10	Si:ch211-194p6.10							F1QQL4	si:ch211-125o16.4	Si:ch211-125o16.4
E9QIK2	mdka	Midkine a (Fragment)							F1QQP0
A0A1D5NS50	hmgb3a	High mobility group box 3a							F1QQP6	brd3a	Bromodomain-containing 3a
A0A1D5NS90	rbm33a	RNA-binding motif protein 33a							F1QQQ3	vtg3	Vitellogenin 3, phosvitinless
A0A1D5NSA5	tpma	Tropomyosin alpha-1 chain (Fragment)							F1QQQ5	gsnb	Gelsolin b
A0A1D5NSE4	sall1a	Spalt-like transcription factor 1a							F1QQT3	lims1	LIM domain-containing protein
A0A1D5NSL0	casc4	Cancer susceptibility candidate 4							F1QQU8	bccip	Protein BCCIP homolog
A0A1D5NSL5	si:ch211-15b10.6	Si:ch211-15b10.6							F1QQV6	aqr	Aquarius intron-binding spliceosomal factor
A0A1D5NSW2	cabz01076234.2	Cabz01076234.2 (Fragment)							F1QQY9
E7FGK1	eml3	EMAP-like 3							F1QQZ1	sf3b1	Splicing factor 3b, subunit 1
A0A1D5NSX9	tpma	Tropomyosin alpha-1 chain (Fragment)							F1QR06	emid1	EMI domain-containing 1 (Fragment)
A0A1D5NSZ9	si:dkey-6n21.12	Si:dkey-6n21.12							F1QR17	aldh7a1	Aldehyde dehydrogenase 7 family, member A1
A0A1D5NT00	mark2b	Non-specific serine/threonine protein kinase (EC 2.7.11.1)							F1QR23
A0A1D5NT07	acp2	Acid phosphatase 2, lysosomal (Fragment)							F1QR34
F1RA88	adam10a	ADAM metallopeptidase domain 10a							F1QR67
E7F1J8									F1QRA8	paplnb	Papilin b, proteoglycan-like sulfated glycoprotein
A0A1L1QZL8	znf280d	Zinc finger protein 280D							F1QRD9
A0A1L1QZ87									F1QRG5	si:dkey-250d21.1	Si:dkey-250d21.1
A0A1L1QZC5									F1QRL9
A0A1L1QZM7	scrib	Protein scribble homolog							F1QRM9	npepps	Aminopeptidase (EC 3.4.11.-)
A0A1L1QZG0	cct2	Chaperonin-containing TCP1, subunit 2 (beta) (Fragment)							F1QRQ2
A0A1L1QZI9	col4a5	Collagen, type IV, alpha 5 (Alport syndrome)							F1QRR2	dct	Dopachrome tautomerase
A0A1L1QZK7									F1QRT0
A0A1L1QZN5									F1QRT6	dnajc8 zgc:136281	DnaJ (Hsp40) homolog, subfamily C, member 8 (Zgc:136281)
A0A1L1QZT0	ikbip	Zgc:113921							F1QRU6
A0A1L1QZU7	col4a6	Collagen, type IV, alpha 6							F1QRW4	pitpnb	Phosphatidylinositol transfer protein, beta
A0A1N8PGD4	zgc:92818	Zgc:92818							F1QRX2	sumo3b	Small ubiquitin-related modifier (SUMO)
A0A1N8RFI4	puf60b	Poly(U)-binding-splicing factor PUF60-B							F1QS14	klc1a	Kinesin light chain 1a
A0A286Y7W7									F1QS28	hnrnpa0a	Heterogeneous nuclear ribonucleoprotein A0a
F1QU54	me1	Malic enzyme (Fragment)							F1QS38
E9QHW2	ccny si:dkey-18n12.2	Cyclin Y							F1QS51	eea1	Early endosome antigen 1
A0A286Y802	arsb	Uncharacterized protein							F1QS59
A0A286Y815	mark2a	Non-specific serine/threonine protein kinase (EC 2.7.11.1)							F1QS69
A0A286Y825									F1QS72	zgc:163079	Zgc:163079
A0A286Y843									F1QS95
A0A286Y849									F1QSB8	ddx42	DEAD (Asp-Glu-Ala-Asp) box helicase 42
A0A286Y855	phex	Phosphate-regulating endopeptidase homolog, X-linked							F1QSC5	col1a1a	Collagen, type I, alpha 1a
F1QX56									F1QSF0
F1QM39	uacab	Uveal autoantigen with coiled-coil domains and ankyrin repeats b							F1QSF6
E9QC91	prrc2a	Proline-rich coiled-coil 2A							F1QSJ5
F1QKH9	rdh1	Retinol dehydrogenase 1							F1QSK1	parp3	Poly [ADP-ribose] polymerase (PARP) (EC 2.4.2.-)
A0A286Y8C3									F1QSP8	prdx4	Peroxiredoxin 4
A0A286Y8C8	p4ha2	Procollagen-proline, 2-oxoglutarate 4-dioxygenase (proline 4-hydroxylase), alpha polypeptide 2							F1QSQ0	dsc2l	Desmocollin 2-like
E9QCA9	cul2	Cullin 2							F1QSR3	tnn tnw	Tenascin N
Q6P1S3	xpnpep1	X-prolyl aminopeptidase (Aminopeptidase P) 1, Soluble							F1QSU3
A0A286Y8F4									F1QSU4	pdlim5b	PDZ and LIM domain 5b
A0A286Y8F7									F1QSV8	elmo3	Engulfment and cell motility 3
A2CEF5	clic5b clic5 DKEY-23G12.1 DKEY-23G12.1-002	Chloride intracellular channel protein							F1QSX8	lpp	LIM domain-containing preferred translocation partner in lipoma
A0A286Y8H4	ctss2.2 ctssb.2	Cathepsin S, ortholog 2, tandem duplicate 2							F1QSY7	iars	Isoleucyl-tRNA synthetase
E7FBE2									F1QSZ2	plrg1	Pleiotropic regulator 1
Q5RIE1	eif2b4	Eukaryotic translation initiation factor 2B, subunit 4 delta							F1QT02
A0A286Y8J7	cenpf	Centromere protein F							F1QT16
A0A286Y8P7	gmppaa	Mannose-1-phosphate guanyltransferase alpha-A							F1QT26	acy3.2	N-acyl-aromatic-L-amino acid amidohydrolase (carboxylate-forming) B
A0A286Y8Q9									F1QT57
A0A286Y8R2	atp6v0a2b	V-type proton ATPase subunit a							F1QT60	viml	Vimentin-like
F1R9G2	qtrt2 QTRT2 qtrtd1	Queuine tRNA-ribosyltransferase accessory subunit 2 (Queuine tRNA-ribosyltransferase domain-containing protein 1)							F1QT63	sarnp	SAP domain-containing ribonucleoprotein
B0S6M2	ipo11	Importin 11							F1QT65	homer2	Homer scaffold protein 2
A0A286Y8U7									F1QT82	prph	Peripherin
F1R801									F1QT86	col5a2a	Collagen, type V, alpha 2a (Fragment)
A0A286Y8V9	lrba	LPS-responsive vesicle-trafficking, beach and anchor-containing							F1QT89	rtn4a	Reticulon
F1RBG9	zgc:123305	Zgc:123305							F1QTB5	rpn1	Dolichyl-diphosphooligosaccharide--protein glycosyltransferase subunit 1
A0A286YBD8	tp53i3	Uncharacterized protein							F1QTI1	clic2	Chloride intracellular channel protein
A0A286Y912	ppm1aa	Protein phosphatase, Mg2+/Mn2+-dependent, 1Aa							F1QTL9	hnrnpa0b	Heterogeneous nuclear ribonucleoprotein A0b
F1Q6C8	dcaf13	DDB1- and CUL4-associated factor 13							F1QTP9	si:ch73-55i23.1	Si:ch73-55i23.1
A0A286Y936									F1QTQ4
F1QV52	cybb	Cytochrome b-245, beta polypeptide (chronic granulomatous disease)							F1QTS3	coro7	Coronin
F1Q8V7									F1QTT0	man2b1	Alpha-mannosidase (EC 3.2.1.-)
A0A286Y950									F1QTT3	jupa jup	Junction plakoglobin a
A0A286Y951	nefla	Neurofilament, light polypeptide a							F1QTU8
A0A286Y958									F1QU38
B3DGV1	stat6	Signal transducer and activator of transcription							F1QU45	bco2a	Beta-carotene oxygenase 2a
F1QF18									F1QU55	bhmt	Betaine--homocysteine S-methyltransferase 1
A0A286Y981									F1QUA0	si:ch211-232i5.1	Si:ch211-232i5.1 (Fragment)
A0A286Y994	zgc:162698	Zgc:162698							F1QUA3	tln2a tln2	Talin 2a
A0A286Y9A1									F1QUD0	ptmaa	Prothymosin alpha-A
A0A286Y9B4									F1QUE3	uqcrc1	Ubiquinol-cytochrome c reductase core protein 1
A0A286YA08									F1QUE7
Q8AW60	ivd OTTDARP00000001747 dZ181P14.1-001	Isovaleryl Coenzyme A dehydrogenase (Isovaleryl-CoA dehydrogenase) (Novel protein similar to human isovaleryl Coenzyme A dehydrogenase (IVD))							F1QUG4
E9QJ40	fam120c	Family with sequence similarity 120C							F1QUG5	eif3c EIF3C EIF3S8	Eukaryotic translation initiation factor 3 subunit C (eIF3c) (Eukaryotic translation initiation factor 3 subunit 8)
F1QXQ3	sfmbt2	Scm-like with four mbt domains 2 (Fragment)							F1QUM3	gsna	Gelsolin a
A0A286Y9H2	myo1cb	Myosin Ic, paralog b							F1QUP1	rpz	Protein rapunzel
A0A286Y9L3									F1QUQ0	iars2	Isoleucyl-tRNA synthetase 2, mitochondrial
Q90ZZ7									F1QUQ7	psmc3	Proteasome 26S subunit, ATPase 3
A0A286Y9N8									F1QUR3
E9QEL0	spag9a	Sperm-associated antigen 9a (Fragment)							F1QUS4	itgb3a	Integrin beta
F1R3L1	tcf3a tcf3	Transcription factor 3a							F1QUV7	gars	Glycyl-tRNA synthetase
F1QPU0	snx24	Sorting nexin 24							F1QUW4	hyou1	Hypoxia up-regulated protein 1
A0A286Y9Z9	si:ch211-200p22.4	Si:ch211-200p22.4							F1QUZ1
A0A286YA11	eps15l1a	Epidermal growth factor receptor pathway substrate 15-like 1a							F1QV12	cul1b	Cullin 1b
Q6ZM71	arrdc1a arrdc1	Arrestin domain-containing 1a							F1QV13	gga1	Golgi-associated, gamma adaptin ear-containing, ARF-binding protein 1
A5WWD7	dpp7	Dipeptidyl-peptidase 7							F1QV15	vtg6 si:rp71-23d18.1	Vitellogenin 6 (Fragment)
F1R0W9	dctn1a	Dynactin 1a							F1QV56	zgc:92313	Zgc:92313
F1R2K4	atp6ap2	ATPase H+-transporting accessory protein 2 (Fragment)							F1QV99
A0A286YBI4									F1QVB1	ptgr1	Prostaglandin reductase 1
A0A286YA51									F1QVC6	srsf9	Serine and arginine-rich-splicing factor 9
B5DE36	bcar1 zgc:175192	BCAR1, Cas family scaffold protein (Zgc:175192 protein)							F1QVC9
F1QX94	eif4g3b eif4g3	Eukaryotic translation initiation factor 4 gamma, 3b							F1QVD2	u2af2a	U2 snRNP auxiliary factor large subunit
B0S621	bfsp2	Beaded filament structural protein 2, phakinin							F1QVG0	ano10b	Anoctamin
E9QFU5	myo6b	Myosin VIb							F1QVH8	hephl1a	Hephaestin-like 1a
A0A286YAA3									F1QVJ7
A0A286YAB4	asph	Aspartate beta-hydroxylase							F1QVP9
E7F3W3	nub1	Negative regulator of ubiquitin-like proteins 1							F1QVR2	nhej1	Non-homologous end-joining factor 1
E7F2Q8									F1QVT4	fam169aa	Family with sequence similarity 169 member Aa
E7FCE3	grhl1	Grainyhead-like transcription factor 1							F1QVT7	zgc:158403	Zgc:158403
A0A286YAF3	LOC100534815	Uncharacterized protein							F1QVV4	cpsf2	Cleavage and polyadenylation specificity factor subunit 2 (Cleavage and polyadenylation specificity factor 100 kDa subunit)
Q5TZ29	apobb.1 apobl	Apolipoprotein Bb, tandem duplicate 1							F1QVW1	mars	Methionyl-tRNA synthetase
E9QJI4									F1QW17	camk2g2	Calcium/calmodulin-dependent protein kinase (CaM kinase) II gamma 2
A0A286YAG3	cpt1cb	Carnitine palmitoyltransferase 1Cb							F1QW18	itpr2	Inositol 1,4,5-trisphosphate receptor, type 2 (Fragment)
A0A286YAG4	dync1i2a	Dynein, cytoplasmic 1, intermediate chain 2a							F1QWB4	hnrnpk	Heterogeneous nuclear ribonucleoprotein K
F1QU19	marco	Macrophage receptor with collagenous structure							F1QWD0	fuca2	Alpha-L-fucosidase (EC 3.2.1.51)
A8E7L4	abi1b	Abl-interactor 1b							F1QWF1	si:dkey-40c11.2	Si:dkey-40c11.2
A0A286YAK8	arhgap17a	Rho GTPase-activating protein 17a							F1QWJ6
Q7T3L3	hsp90b1 GP96 tra1	Chaperone protein GP96 (Heat shock protein 90, beta (Grp94), member 1)							F1QWK0
F1Q6D7	brap	BRCA1-associated protein							F1QWM3	ube2ka	Ubiquitin-conjugating enzyme E2Ka (UBC1 homolog, yeast)
A0A286YAR2	rpl5b	Ribosomal protein L5b							F1QWP0	cstf2	Cleavage stimulation factor, 3' pre-RNA, subunit 2
A0A286YAS2									F1QWS5	si:ch211-166a6.5	Si:ch211-166a6.5 (Fragment)
A0A286YAV0									F1QWX4	spra	Sepiapterin reductase a
A0A286YAV3	cep162	Centrosomal protein of 162 kDa							F1QX13	c3a.3 c3c	Complement component c3a, duplicate 3
A0A286YAV6	ppp1r9ala	Protein phosphatase 1 regulatory subunit 9A-like A							F1QX19	zmpste24	CAAX prenyl protease (EC 3.4.24.84)
A0A286YAX2									F1QX56
F1R966	cltca	Clathrin heavy chain							F1QX93	eci1	Enoyl-CoA delta isomerase 1 (Fragment)
F1QE20	mef2d	Myocyte enhancer factor 2d							F1QXB0	sptbn2	Spectrin beta chain
X1WD65									F1QXB1
Q5RH29	itih2	Inter-alpha-trypsin inhibitor heavy chain 2							F1QXC3	arl9	ADP-ribosylation factor-like 9
X1WGJ5	lypc si:ch73-156o22.2	Ly6 domain-containing, pigment cell (Lypc)							F1QXD5	col10a1a	Collagen, type X, alpha 1a
A0A286YB85	pkp3b	Plakophilin 3b							F1QXF0
F1QZB9	magi1b	Membrane-associated guanylate kinase, WW and PDZ domain-containing 1b							F1QXH2	afap1l1b	Actin filament-associated protein 1-like 1b
E7FCA5									F1QXK1	si:ch211-207d6.2	Si:ch211-207d6.2
B8A4D5	mgme1 MGME1	Mitochondrial genome maintenance exonuclease 1 (EC 3.1.-.-)							F1QXM0	higd2a zgc:112385	HIG1 hypoxia-inducible domain family, member 2A (Zgc:112385)
Q08CJ6	grk4 zgc:153020	G protein-coupled receptor kinase (EC 2.7.11.-)							F1QXP5	mthfd1b	Methylenetetrahydrofolate dehydrogenase (NADP+-dependent) 1b
A0A286YBE6	kif21a	Kinesin family member 21A							F1QXP8	khsrp	KH-type-splicing regulatory protein
A0A286YBG3	mpp1	Membrane protein, palmitoylated 1							F1QXP9	dmd	Dystrophin (Fragment)
A0A286YBG9	adpgk	ADP-dependent glucokinase							F1QXV8	pgk1	Phosphoglycerate kinase (EC 2.7.2.3)
E7F250	mrc2	Mannose receptor, C type 2							F1QXX8	gnav1	Guanine nucleotide-binding protein (G protein) alpha v1 (Fragment)
A0A286YBK3	galnt7	Polypeptide N-acetylgalactosaminyltransferase (EC 2.4.1.-) (Protein-UDP acetylgalactosaminyltransferase)							F1QXY8
E7EXW8	glg1a	Golgi glycoprotein 1a							F1QXZ7	tjp3	Tight junction protein 3 (Fragment)
A0A286YBS1									F1QY00	nmt1a	Glycylpeptide N-tetradecanoyltransferase (EC 2.3.1.97)
A0A286YBT4	clic6	Chloride intracellular channel 6							F1QY25	zgc:162509	Zgc:162509
F1QSU2	cluha cluh	Clustered mitochondria protein homolog							F1QY27	h1fx	H1 histone family, member X
A0JME6	isoc2 zgc:109735	Isochorismatase domain-containing protein 2							F1QY29	prelp	Proline/arginine-rich end leucine-rich repeat protein
A0JMK3	zgc:153913	Zgc:153913							F1QY34	lrp1ab lrp1	Low density lipoprotein receptor-related protein 1Ab
A0JMK5	mtmr2 si:dkey-110k5.3	Myotubularin-related protein 2 (Phosphatidylinositol-3,5-bisphosphate 3-phosphatase) (EC 3.1.3.95) (Phosphatidylinositol-3-phosphate phosphatase) (EC 3.1.3.64)							F1QY43	psmd1	Proteasome 26S subunit, non-ATPase 1 (Fragment)
A0JML6	tuft1a zgc:153955	Tuftelin 1a (Zgc:153955) (Zgc:153955 protein)							F1QY65	prpf6 c20orf14	C20orf14 homolog (H. sapiens) (PRP6 pre-mRNA-processing factor 6 homolog (S. cerevisiae))
A0JMM3	neu3.3	Neu3.3 (Neu3.3 protein) (Sialidase 3 (membrane sialidase), tandem duplicate 3) (Sialidase 3.3)							F1QYF0	tbl3	Transducin (beta)-like 3
A0JMM8	irg1l zgc:154020	Immunoresponsive gene 1,-like (Zgc:154020)							F1QYF4	ap1g2 zC14A17.4-001	AP-1 complex subunit gamma
A0JMN4	csk	Tyrosine-protein kinase (EC 2.7.10.2)							F1QYG1	eif2a	Eukaryotic translation initiation factor 2A (eIF-2A)
A0JMN8	osbpl9	Oxysterol-binding protein							F1QYJ6	sult6b1	Sulfotransferase 6B1 (EC 2.8.2.-) (Thyroxine sulfotransferase) (EC 2.8.2.n2)
A0JMP4	atp2a1l	Calcium-transporting ATPase (EC 7.2.2.10)							F1QYK9	myl9a	Myosin, light chain 9a, regulatory
G1K2T0									F1QYM0	trim16	Tripartite motif-containing 16 (Fragment)
A0JMQ6	cyp4v8 cyp4v2	Cyp4v2 protein (Cytochrome P450, family 4, subfamily V, polypeptide 2) (Cytochrome P450, family 4, subfamily V, polypeptide 8)							F1QYM2	ly75	Lymphocyte antigen 75 (Fragment)
A0MTA1	apex1 apex1a apex1b si:ch211-214j24.12 zgc:66204	DNA-(apurinic or apyrimidinic site) lyase (EC 3.1.-.-) (EC 4.2.99.18) (APEX nuclease) (APEN) (Apurinic-apyrimidinic endonuclease 1) (AP endonuclease 1) (zAP1)							F1QYM4	eif4h	Eukaryotic translation initiation factor 4h
A0PJR5	echdc3 zgc:158321	Enoyl-CoA hydratase domain-containing protein 3, mitochondrial							F1QYN1	col4a6	Collagen, type IV, alpha 6
A0PJT0	rilpl1 zgc:158490	RILP-like protein 1 (Rab-interacting lysosomal-like protein 1)							F1QYR1
F1QFA6	cnot1	CCR4-NOT transcription complex subunit 1							F1QYS7	acss1	Acetyl-coenzyme A synthetase (EC 6.2.1.1)
A1A5H8	yes1 yes	Tyrosine-protein kinase yes (EC 2.7.10.2) (p61-Yes)							F1QYT2	sqor sqrdl	Sulfide quinone oxidoreductase
A1A5T2	pisd PISD zgc:158135	Phosphatidylserine decarboxylase proenzyme, mitochondrial (EC 4.1.1.65) [Cleaved into: Phosphatidylserine decarboxylase beta chain; Phosphatidylserine decarboxylase alpha chain]							F1QYT3	apbb1ip	Amyloid beta A4 precursor protein-binding family B member 1-interacting protein
A1A5X4	add1	adducin 1 (Alpha)							F1QYU0	lama4	Laminin, alpha 4
A1A5X7	taf15 zgc:158363	TAF15 RNA polymerase II, TATA box-binding protein (TBP)-associated factor (Zgc:158363)							F1QYU7	mat2aa MAT2AA	S-adenosylmethionine synthase (EC 2.5.1.6)
A1A5Y1	mgst3b zgc:158387	Microsomal glutathione S-transferase 3b (Zgc:158387)							F1QYW8	nap1l4a	Nucleosome assembly protein 1-like 4a
A1A5Y7	hmgn7 zgc:158409	High mobility group nucleosomal-binding domain 7 (Zgc:158409)							F1QYX8	hadhab	Hydroxyacyl-CoA dehydrogenase trifunctional multienzyme complex subunit alpha b
A1A5Z3	tsfm zgc:158429	Elongation factor Ts, mitochondrial (EF-Ts) (EF-TsMt)							F1QZ09	aclya	ATP-citrate synthase (EC 2.3.3.8) (ATP-citrate (pro-S-)-lyase) (Citrate cleavage enzyme)
A1A605	ybx1	Y-box-binding protein 1							F1QZ15	tprkb	EKC/KEOPS complex subunit TPRKB (PRPK-binding protein) (TP53RK-binding protein)
A1L1G1	esrp1 rbm35a zgc:154050	Epithelial splicing regulatory protein 1 (RNA-binding motif protein 35A) (RNA-binding protein 35A)							F1QZ45
A1L1M4	ppp4r2b wu:fc23g05	Serine/threonine-protein phosphatase 4 regulatory subunit 2-B							F1QZ50	ahnak	AHNAK nucleoprotein
A1L1T1	fam129ba fam129b zgc:158319	Family with sequence similarity 129 member Ba (Zgc:158319)							F1QZ60	xrcc6	X-ray repair-complementing defective repair in Chinese hamster cells 6
A1L1U3	g3bp2 zgc:158370	GTPase-activating protein (SH3 domain)-binding protein 2 (Zgc:158370)							F1QZ78	gmppab	Mannose-1-phosphate guanyltransferase alpha-B
A1L1V1	fnta zgc:158397	Farnesyltransferase, CAAX box, alpha (Zgc:158397)							F1QZA4	idh3g	Isocitrate dehydrogenase [NAD] subunit, mitochondrial
A1L1V4	loxl2b si:dkeyp-32b1.1 zgc:158414	Lysyl oxidase homolog 2B (EC 1.4.3.13) (Lysyl oxidase-like protein 2B)							F1QZA5	psmd6	Proteasome 26S subunit, non-ATPase 6
A1L200	eif4e2 eIF4E2A zgc:110542	Eukaryotic translation initiation factor 4E class II 2A (Eukaryotic translation initiation factor 4E family member 2) (Zgc:110542 protein)							F1QZB0	crip2	Cysteine-rich protein 2
A1L223	cbx5	Cbx5 protein (Chromobox homolog 5 (HP1 alpha homolog, Drosophila))							F1QZD3	uap1	UDP-N-acetylglucosamine pyrophosphorylase 1
A1L243	mesd mesdc2 zgc:158636	LRP chaperone MESD (LDLR chaperone MESD) (Mesoderm development candidate 2) (Mesoderm development protein)							F1QZG1	myof	Myoferlin
F1R4P9	ranbp9	Ran-binding protein 9							F1QZL6	gpia	Glucose-6-phosphate isomerase (EC 5.3.1.9)
A1L293	ptpmt1	Protein tyrosine phosphatase, mitochondrial 1							F1QZM5
A1L2B7	sirt3	NAD-dependent protein deacetylase (EC 3.5.1.-)							F1QZN1
A1XF92	crtac1a CRTAC-2 crtac1	Cartilage acidic protein 1a (Cartilage acidic protein 2)							F1QZQ0	ttn.2 ttna	Titin, tandem duplicate 2 (Fragment)
A1XQX2	nrxn1b	Neurexin-1b (Neurexin Ib-alpha) (Neurexin-1b-alpha)							F1QZU1	tnks1bp1	Tankyrase 1-binding protein 1
A2AR65	rca2.1	Regulator of complement activation group 2 gene 1							F1QZU5	ptpn11a ptpn11	Tyrosine-protein phosphatase non-receptor type (EC 3.1.3.48)
A2AR68	gdi1	Rab GDP dissociation inhibitor							F1QZW7	ilf3a	Interleukin enhancer-binding factor 3a
A2ARG7	atp5meb atp5ib	ATP synthase membrane subunit eb							F1QZX5
A2ARH1	rchy1	Ring finger and CHY zinc finger domain-containing 1							F1QZX6
A2AV34	coq9	Coenzyme Q9 homolog (S. cerevisiae)							F1QZY1
A2AV36	prmt7 ch211-51l3.2	Protein arginine N-methyltransferase 7 (EC 2.1.1.321) (Histone-arginine N-methyltransferase PRMT7) ([Myelin basic protein]-arginine N-methyltransferase PRMT7)							F1QZY2
A2AW97	si:ch211-239f4.6	Si:ch211-239f4.6							F1QZY3
A2AWA1	ddx39aa	DEAD (Asp-Glu-Ala-Asp) box polypeptide 39Aa							F1QZZ8
A2AWE1									F1R001
A2BDW5	rhoaa	Rho-related GTP-binding protein RhoA-A							F1R021
A2BE49	ppm1f	Protein phosphatase, Mg2+/Mn2+-dependent, 1F							F1R046
A2BEG2	trmt2a	tRNA methyltransferase 2 homolog A							F1R074	agrn	Agrin
A2BEG3	dgcr8	DGCR8 microprocessor complex subunit							F1R0C0	pgls	6-phosphogluconolactonase (6PGL) (EC 3.1.1.31)
A2BEN1	atp6v1aa atp6v1al	ATPase H+-transporting V1 subunit Aa							F1R0C1	sorbs3	Sorbin and SH3 domain-containing 3
A2BEP0	mrps31	Mitochondrial ribosomal protein S31							F1R0C4	rmdn1	Regulator of microtubule dynamics 1
A2BEV1	mtif3	Mitochondrial translational initiation factor 3							F1R0D5
A2BEV5	wasf3a	WAS protein family, member 3a							F1R0G9
A2BF91	zgc:101858	Zgc:101858							F1R0N0	lrrc17	Leucine-rich repeat-containing 17
A2BFD8	thy1	Thy-1 cell surface antigen							F1R0S8	ist1	Increased sodium tolerance 1 homolog (yeast)
A2BFG9	ubash3ba	Ubiquitin-associated and SH3 domain-containing Ba							F1R0W9	dctn1a	Dynactin 1a
A2BFT4	ftr82	FinTRIM family, member 82							F1R0X4	zgc:162634	Zgc:162634
A2BG36	vamp5	Vesicle-associated membrane protein 5							F1R0Z8	pfdn4 si:dkey-222e15.2	Prefoldin subunit 4
A2BG39	ncaph	Condensin complex subunit 2							F1R114
A2BGB4	pafah1b2 si:ch211-139a5.3	Platelet-activating factor acetylhydrolase 1b, catalytic subunit 2 (Si:ch211-139a5.3)							F1R117
A2BGD2	hoxc13a	Homeobox protein Hox-C13a							F1R148
A2BGD4	rarga	Retinoic acid receptor gamma-A (Fragment)							F1R156
A2BGG2	zfr	Zinc finger RNA-binding protein							F1R182	aimp2	Aminoacyl tRNA synthetase complex-interacting multifunctional protein 2
A2BGL0	papolg	Poly(A) polymerase gamma							F1R183	eif4bb	Eukaryotic translation initiation factor 4Bb
A2BGN0	mmab si:dkey-189p24.5	Metabolism of cobalamin-associated B							F1R184	txndc5	Thioredoxin domain-containing 5
A2BGP8	fam151b	Family with sequence similarity 151 member B							F1R187	abi1a	Abl-interactor 1a
A2BGQ1	dhfr	Dihydrofolate reductase							F1R1C0	acsf2	Acyl-CoA synthetase family member 2, mitochondrial
A2BGQ5	AK6 CINAP zgc:86811	Adenylate kinase isoenzyme 6 (AK6) (EC 2.7.4.3) (Coilin-interacting nuclear ATPase protein) (Dual activity adenylate kinase/ATPase) (AK/ATPase)							F1R1D1	ptpn23a	Protein tyrosine phosphatase, non-receptor type 23, a
F1QFR6	erap1b	Aminopeptidase (EC 3.4.11.-)							F1R1E9	ube2v1	Ubiquitin-conjugating enzyme E2 variant 1
A2BGR3	ercc6l si:ch211-278b8.3	DNA excision repair protein ERCC-6-like (EC 3.6.4.12) (ATP-dependent helicase ERCC6-like)							F1R1G6
A2BGR9	aldh2.1	Aldehyde dehydrogenase 2 family member, tandem duplicate 1							F1R1I6	acss3	Acyl-CoA synthetase short chain family member 3 (Fragment)
Q6DHN7									F1R1J3	zgc:86599	Zgc:86599 (Fragment)
A2BGU5	lrpap1	Low density lipoprotein receptor-related protein-associated protein 1							F1R1L9	sun1	Sad1 and UNC84 domain-containing 1
A2BGU9	serhl ch211-214c7.1 zgc:55804	Serine hydrolase-like protein (EC 3.1.-.-)							F1R1N9	cd2ap cd2apl	CD2-associated protein
E9QDQ2	camk2b1	Calcium/calmodulin-dependent protein kinase (CaM kinase) II beta 1							F1R1P3
A2BGW6	utp11l	U3 small nucleolar RNA-associated protein 11 (U3 snoRNA-associated protein 11)							F1R1P6	nansa	N-acetylneuraminic acid synthase a
A2BHA3	ckma	Creatine kinase, muscle a							F1R1P9	thbs4b	Thrombospondin-4-B
A2BHB8	isg15 si:rp71-1c23.2	ISG15 ubiquitin-like modifier							F1R1R7	f13a1b	Coagulation factor XIII, A1 polypeptide b
A2BHD8	hexb hexa DKEY-35I22.2-001	Beta-hexosaminidase (EC 3.2.1.52)							F1R1U9	si:dkey-21e2.13	Si:dkey-21e2.13 (Fragment)
A2BHN0	anxa3a	Annexin							F1R1W1	strn3	Striatin, calmodulin-binding protein 3
A2BI17	rhobtb4 rhobtb2a	Rho-related BTB domain-containing 4							F1R1W4	b2ml	Beta-2-microglobulin (Fragment)
A2BIC5	rbm47	RNA-binding motif protein 47							F1R1W8	aatf	Apoptosis-antagonizing transcription factor
A2BIC6	lap3	Leucine aminopeptidase 3							F1R222	dctn4	Dynactin 4
F1R847									F1R243	fam49bb	Family with sequence similarity 49 member Bb
A2BIE9	qdprb1	Quinoid dihydropteridine reductase b1							F1R246	dars	Aspartyl-tRNA synthetase
A2BIH6	lrrc8da	Leucine-rich repeat-containing 8 VRAC subunit Da							F1R253	clasp1a	Cytoplasmic linker-associated protein 1a
A2BIJ3	bsdc1 si:ch211-51n3.2 zgc:100785	BSD domain-containing protein 1							F1R263	ilvbl	Acetolactate synthase-like protein (Fragment)
A2BIK1	si:dkey-224e22.2	Beta-galactosidase (EC 3.2.1.23)							F1R264	ephx2	Epoxide hydrolase 2, cytoplasmic
A2BIM7	tars	Threonyl-tRNA synthetase							F1R293	adsl	Adenylosuccinate lyase (ASL) (EC 4.3.2.2) (Adenylosuccinase)
A2BIN5	mccc2	Methylcrotonoyl-CoA carboxylase 2 (beta)							F1R2A3	pfkpa si:ch73-73n3.1	Phosphofructokinase, platelet a (Fragment)
A2BIN8	nos2a	Nitric oxide synthase (EC 1.14.13.39)							F1R2A5
A2BIQ8	zcchc8	Zinc finger, CCHC domain-containing 8							F1R2J2	arhgap1	Rho GTPase-activating protein 1
A2BIR0	sec14l8 si:ch211-89f7.1	SEC14-like lipid-binding 8							F1R2Q8	si:dkey-34l15.1	Si:dkey-34l15.1
A2BIR3	ube2l3b ube2l3l	Ubiquitin-conjugating enzyme E2L 3b							F1R2S5	vtg5	Vitellogenin 5 (Fragment)
A2BIR7	sdf2l1	Stromal cell-derived factor 2-like 1							F1R2T3	vtg7	Vitellogenin 7
A2CE51	eef2l2	Eukaryotic translation elongation factor 2,-like 2							F1R2V0	aoc2	Amine oxidase (EC 1.4.3.-) (Fragment)
A2CE73	khdrbs1a	KH domain-containing, RNA-binding, signal transduction-associated 1a							F1R2V7	atp5f1b atp5b zgc:111961	ATP synthase subunit beta (EC 7.1.2.2)
A2CE76	upk3b upk3l	Uroplakin 3b							F1R2W1	dhrs13a.3 dhrs13	Dehydrogenase/reductase (SDR family) member 13a, duplicate 3
F1QAC1	iqgap2	IQ motif-containing GTPase-activating protein 2							F1R300	snrpa1	Small nuclear ribonucleoprotein polypeptide A'
A2CEA9	bri3bp	Bri3-binding protein							F1R314	zgc:110425	Zgc:110425
A2CEB2									F1R319	slc25a11	Solute carrier family 25 member 11
A2CEF7	mark3b DKEY-23G12.2-001	Non-specific serine/threonine protein kinase (EC 2.7.11.1)							F1R331
A2CEI3	rabep1	Rabaptin, RAB GTPase-binding effector protein 1							F1R334
A2CEI4	nup88	Nucleoporin 88							F1R346	pon3.2	Paraoxonase 3, tandem duplicate 2
A2CEM4	atl3	Atlastin 3							F1R378	nenf	Neudesin neurotrophic factor
A2CEN0	fibpa	Fibroblast growth factor (acidic) intracellular-binding protein a							F1R3A2
A2CEN1	efemp2a	EGF-containing fibulin extracellular matrix protein 2a							F1R3D3	gapdhs	Glyceraldehyde-3-phosphate dehydrogenase (EC 1.2.1.12)
A2CET2	napaa	N-ethylmaleimide-sensitive factor attachment protein, alpha a							F1R3F6		Uncharacterized protein
A2CET4	ppfibp2b	PTPRF-interacting protein,-binding protein 2b (liprin beta 2) (Fragment)							F1R3F7	c1qbp	Complement component 1, q subcomponent-binding protein
A2CEW3	fn1b	Fibronectin 1b							F1R3G7
A2CEW4	atic	5-aminoimidazole-4-carboxamide ribonucleotide formyltransferase/IMP cyclohydrolase							F1R3G8	srm	Spermidine synthase
A2CEW6	stk16	Serine/threonine kinase 16							F1R3H1	rpz4	Rapunzel 4
A2CEX4	ascc2	Activating signal cointegrator 1 complex subunit 2							F1R3I6	setb	SET nuclear proto-oncogene b
A2CEY7	si:dkey-251i10.2	Si:dkey-251i10.2							F1R3I9	si:dkey-65b12.6	Si:dkey-65b12.6 (Fragment)
A2CEY8	si:dkey-251i10.3	Si:dkey-251i10.3							F1R3J9	prmt1	Protein arginine methyltransferase 1
A2CF03	las1l	LAS1-like, ribosome biogenesis factor							F1R3K9	si:ch211-173p18.3	Si:ch211-173p18.3
A2CF31	atxn2 si:dkey-165i4.1	Ataxin 2							F1R3L6	rad54l2	RAD54-like 2
A2CF32	glipr2	GLI pathogenesis-related 2							F1R3P0
A2CF42	lrsam1	Leucine-rich repeat and sterile alpha motif-containing 1							F1R3Q3	sept6	Septin 6
A2CF48	crata	Carnitine O-acetyltransferase a							F1R3T3	ddx1	DEAD (Asp-Glu-Ala-Asp) box helicase 1
A2CF49	ptpa ppp2r4	Serine/threonine-protein phosphatase 2A activator (EC 5.2.1.8) (Phosphotyrosyl phosphatase activator)							F1R3T4	galk1	Galactokinase 1
A2CG10	ap3m2	Adaptor-related protein complex 3 subunit mu 2							F1R3X2	mcts1	Malignant T-cell-amplified sequence
A2CG95	acadm	Acyl-CoA dehydrogenase medium chain							F1R417	rock2b	Rho-associated protein kinase (EC 2.7.11.1)
A2RUX1	arhgef1a arhgef1	Rho guanine nucleotide exchange factor (GEF) 1 (Rho guanine nucleotide exchange factor (GEF) 1a)							F1R431
A2RUY5	ubap2b zgc:158399	Ubiquitin-associated protein 2b (Zgc:158399 protein)							F1R434	myg1 zgc:136866	Zgc:136866
A2RV01	dph6 atpbd4 zgc:110758	Diphthine--ammonia ligase (EC 6.3.1.14) (ATP-binding domain-containing protein 4) (Diphthamide synthase) (Diphthamide synthetase) (Protein DPH6 homolog)							F1R444	prkcaa prkca	Protein kinase C (EC 2.7.11.13)
A2RV40	rnf126 zgc:158807	Ring finger protein 126 (Zgc:158807 protein)							F1R446	sptan1 spna2	Spectrin alpha, non-erythrocytic 1
A2THY5	mtx1a	Metaxin 1a							F1R454	ca2	Carbonic anhydrase II
A2VCZ7	wwp2 zgc:154036	E3 ubiquitin-protein ligase (EC 2.3.2.26)							F1R473	actl6a	Actin-like 6A
E7F8C0	ipo9	Importin 9							F1R475
A2VD29	zgc:158463	Zgc:158463 (Zgc:158463 protein)							F1R4A7	guk1a zgc:86776	Guanylate kinase 1a (Zgc:86776)
A3FKT8	icn2 Icn2	Protein S100 (S100 calcium-binding protein)							F1R4B4
A3KGT9	agpat9l si:ch211-155m12.4	Glycerol-3-phosphate acyltransferase 3-like (EC 2.3.1.15) (1-acyl-sn-glycerol-3-phosphate O-acyltransferase 9-like) (1-AGP acyltransferase 9-like) (1-AGPAT 9-like) (EC 2.3.1.51) (Lysophosphatidic acid acyltransferase theta-like) (LPAAT-theta-like)							F1R4B6	ggps1	Geranylgeranyl diphosphate synthase 1
A3KGZ5	vps37b si:dkey-21k4.4	Vacuolar protein sorting 37 homolog B (S. cerevisiae)							F1R4B7	usp14	Ubiquitin-specific peptidase 14 (tRNA-guanine transglycosylase)
A3KGZ6	ppp3cca ppp3cc	Serine/threonine-protein phosphatase (EC 3.1.3.16) (Fragment)							F1R4B9	ifih1	Interferon-induced with helicase C domain 1
A3KMS7	snw1	Snw1 protein							F1R4C3
A3KMS9	prkacaa zgc:158799	Protein kinase, cAMP-dependent, catalytic, alpha, genome duplicate a (Zgc:158799 protein)							F1R4C8	ndufs3	NADH:ubiquinone oxidoreductase core subunit S3
A3KMT0	zgc:158803	Zgc:158803 (Zgc:158803 protein)							F1R4E4	LOC100005175 LOC100005266 LOC108191752	Uncharacterized protein
A3KNH4	plod3	Plod3 protein (Procollagen-lysine, 2-oxoglutarate 5-dioxygenase 3)							F1R4G2	blmh	Bleomycin hydrolase
F1QBT1	nfya	Nuclear transcription factor Y, alpha (Fragment)							F1R4G5
F1Q8S7	ccndbp1	Cyclin-D1-binding protein 1 homolog							F1R4I3
F1QM04	med11 MED11	Mediator of RNA polymerase II transcription subunit 11 (Mediator complex subunit 11) (Fragment)							F1R4I7	sri	Sorcin
A3KNK9	zgc:162171	Zgc:162171 (Zgc:162171 protein)							F1R4K1	zgc:153426	Tubulin beta chain
A3KNL2	f11r.2 f11rl si:ch211-89p1.1	F11 receptor, tandem duplicate 2 (Si:ch211-89p1.1 protein)							F1R4L5	pof1b si:dkeyp-8h9.2	POF1B, actin-binding protein
A3KNL5	atp5if1a atpia atpif1 pnt Zgc:162207	ATPase inhibitor A, mitochondrial (ATP synthase F1 subunit epsilon A) (Inhibitor of F(1)F(o)-ATPase A) (IF(1) A) (IF1 A) (Protein pinotage)							F1R4M2	rab3il1	RAB3A-interacting protein (rabin3)-like 1
A3KNM1	asmt2 zgc:162232	Acetylserotonin O-methyltransferase 2 (Zgc:162232 protein)							F1R4S7	ak3 AK3	GTP:AMP phosphotransferase AK3, mitochondrial (EC 2.7.4.10) (Adenylate kinase 3) (AK 3)
A3KNM2	tpd52 si:ch211-203l9.2 si:ch211-203l9.3	Si:ch211-203l9.2 (Tumor protein D52)							F1R4U0	slc25a1b	Slc25a1 solute carrier family 25 member 1b
A3KNP4	bud23 wbscr22 zgc:162306	BUD23, rRNA methyltransferase and ribosome maturation factor (Zgc:162306 protein)							F1R4V9
A3KNP6	sfrp1b	Secreted frizzled-related protein 1b (Sfrp1b protein)							F1R4Z8	gsta.1 gstal	Glutathione S-transferase, alpha tandem duplicate 1
A3KNQ1	hmg20a zgc:162335	High mobility group 20A (Zgc:162335 protein)							F1R540	rtn1b	Reticulon
A3KNS2	cnpy3 tnrc5	Protein canopy homolog 3 (Trinucleotide repeat-containing gene 5 protein)							F1R588
A3KNX4	chchd1 zgc:162640	Coiled-coil-helix-coiled-coil-helix domain-containing 1 (Zgc:162640 protein)							F1R5A5	krt5	Keratin 5
A3KP47	zgc:162941	Lysozyme g (EC 3.2.1.17)							F1R5C2	acot9.1	Acyl-CoA thioesterase 9, tandem duplicate 1
F1QSS0	riox1	Ribosomal oxygenase 1							F1R5D8	si:ch211-76m11.5	Si:ch211-76m11.5
I3IRW0	oxnad1	Oxidoreductase NAD-binding domain-containing protein 1							F1R5E6	calub	Calumenin-B
A3KPG5									F1R5G2	nxn	Nucleoredoxin
A3KPH5	crp7	Pentaxin (Pentraxin)							F1R5K7	hspg2	Heparan sulfate proteoglycan 2
A3KPH8	crp2	Pentaxin (Pentraxin)							F1R5P8	si:dkey-73n8.3	Si:dkey-73n8.3 (Fragment)
A3KPI6	si:ch211-288g17.3	Si:ch211-288g17.3							F1R5R0	cthl	Cystathionase (cystathionine gamma-lyase),-like
A3KPL8	cfdp1 si:dkey-6e12.6	Craniofacial development protein 1 (Bucentaur)							F1R5X0	pygb	Alpha-1,4 glucan phosphorylase (EC 2.4.1.1)
A3KPM6	grm3 CH211-233H19.1-001	Glutamate receptor, metabotropic 3 (Metabotropic glutamate receptor 3) (Novel protein similar to vertebrate glutamate receptor, metabotropic 3 (GRM3))							F1R611	ndufab1a	Acyl carrier protein
A3KPN4	ptx3a	Pentraxin 3, long a							F1R617	myo1b myo1bl2	Myosin IB
A3KPP9	exoc1	Exocyst complex component 1							F1R653	hdac1	Histone deacetylase (EC 3.5.1.98)
A3KPQ6	abhd17b	Abhydrolase domain-containing 17B (Fragment)							F1R664	zbtb7a	Zinc finger and BTB domain-containing 7a (Fragment)
A3KPR1	wdr36	WD repeat domain 36							F1R665	cavin2b sdprb	Caveolae-associated protein 2b
A3KPR3	histh1l	Histone H1-like							F1R676	pofut1	Protein O-fucosyltransferase 1
A3KPR4	hist1h4l zgc:165555	Histone H4							F1R683	gmppb	Mannose-1-phosphate guanyltransferase beta
A3KPT4	clasp2	CLIP-associating protein 2							F1R6B8	ptgdsb.2	Prostaglandin D2 synthase b, tandem duplicate 2
A3KPX2	abcf1	ATP-binding cassette, sub-family F (GCN20), member 1							F1R6C8	ctnnd1	Catenin (cadherin-associated protein), delta 1
A3KPX4	ppp1r10	Protein phosphatase 1, regulatory subunit 10							F1R6E5	rad23b	RAD23 homolog B, nucleotide excision repair protein
A3KPZ2	cratb DKEY-63J1.1-001	Carnitine O-acetyltransferase b (Novel protein similar to vertebrate carnitine acetyltransferase (CRAT))							F1R6F6	grk5l	G protein-coupled receptor kinase (EC 2.7.11.-)
A3KPZ9	si:ch211-152p11.4 CH211-152P11.4-001	Novel protein similar to vertebrate regulator of G-protein signalling family (Si:ch211-152p11.4)							F1R6G3	lum	Lumican (Fragment)
A3KQ03	mgat1b CH211-152P11.3-001	Mannosyl (alpha-1,3-)-glycoprotein beta-1,2-N-acetylglucosaminyltransferase b (Novel protein similar to vertebrate mannosyl (Alpha-1,3-)-glycoprotein beta-1,2-N-acetylglucosaminyltransferase (MGAT1))							F1R6H1
A3KQ59	usp39	Ubiquitin-specific peptidase 39							F1R6K0
A3KQA9	rnf141	RING finger protein 141 (Fragment)							F1R6L4	cirbpb	Cold-inducible RNA-binding protein b (Fragment)
A3KQB2	eif4g2b	Eukaryotic translation initiation factor 4, gamma 2b							F1R6L8	arhgap17b	Rho GTPase-activating protein 17b
A3KQE0	si:dkey-29p10.4	Si:dkey-29p10.4							F1R6R1	acin1a	Apoptotic chromatin condensation inducer 1a (Fragment)
A3KQE3	zgc:56106	Zgc:56106							F1R6R2	si:ch211-270n8.1	Si:ch211-270n8.1 (Fragment)
A3KQF0	uprt	Uracil phosphoribosyltransferase homolog							F1R6T0	mta2	Metastasis-associated 1 family, member 2
A3KQI1	gtpbp1l	GTP-binding protein 1,-like							F1R6U5	snw1	Snw1 protein
A3KQK2	asns	Asparagine synthetase							F1R6V4
A3KQK3	bloc1s4 cno	Biogenesis of lysosomal organelles complex-1, subunit 4, cappuccino							F1R6W0
A3KQK6	sdhaf3	Succinate dehydrogenase assembly factor 3, mitochondrial							F1R6Y8
A3KQR0	acadl	Acyl-CoA dehydrogenase long chain							F1R729	fgf9 si:dkey-281i8.3	Fibroblast growth factor (FGF) (Fragment)
A3KQS0	mrpl9	Mitochondrial ribosomal protein L9							F1R731
A3KQV2	brox si:ch211-14a11.3 zgc:101706	BRO1 domain-containing protein BROX (BRO1 domain- and CAAX motif-containing protein)							F1R737
A3KQW7	ngly1	Peptide-N(4)-(N-acetyl-beta-glucosaminyl)asparagine amidase							F1R750	ipo4 si:ch211-196f5.1	Importin 4 (Fragment)
A3KQW9	adnp2b	ADNP homeobox 2b							F1R776	dcps	Decapping enzyme, scavenger
A3KQX1	cndp2	Carnosine dipeptidase 2							F1R7A2	fam129bb	Family with sequence similarity 129 member Bb
A3QJU3	coq8b adck4	Atypical kinase COQ8B, mitochondrial (EC 2.7.-.-) (AarF domain-containing protein kinase 4) (Coenzyme Q protein 8B)							F1R7F6	uggt1	UDP-glucose glycoprotein glucosyltransferase 1
A3QJW5	ctps1a	CTP synthase (EC 6.3.4.2) (UTP--ammonia ligase)							F1R7K1
A3QJY9	pex11a si:dkeyp-84g1.1	Peroxisomal biogenesis factor 11 alpha (Si:dkeyp-84g1.1 protein) (Fragment)							F1R7L3	bysl	Bystin-like (Fragment)
A3QK16	erlin2 si:dkey-204l11.2	Erlin-2 (Endoplasmic reticulum lipid raft-associated protein 2)							F1R7M1	arhgap17a	Rho GTPase-activating protein 17a
A3QK39	bcl7a	B-cell CLL/lymphoma 7 protein family member A							F1R7N2	tgm2b	Tgm2b protein (Transglutaminase 2b)
A3QK40	ncor1	Nuclear receptor corepressor 1							F1R7S1	cope	Coatomer subunit epsilon
A3RK74	foxo1a foxo1 foxO1a.1	Forkhead box protein O1-A							F1R7W0	col17a1b	Collagen, type XVII, alpha 1b
A4FUL3	rbx1	Rbx1 protein (Ring-box 1, E3 ubiquitin protein ligase)							F1R7W8	sec23b	Protein transport protein SEC23
A4FUL9	zgc:136564	Queuosine salvage protein							F1R7X5	suclg2 SUCLG2	Succinate--CoA ligase [GDP-forming] subunit beta, mitochondrial (EC 6.2.1.4) (GTP-specific succinyl-CoA synthetase subunit beta) (G-SCS) (GTPSCS) (Succinyl-CoA synthetase beta-G chain) (SCS-betaG)
A4FUN5	isy1 rab43	ISY1-splicing factor homolog (Rab43 protein)							F1R821
A4FUP0	sult2st3	Sulfotransferase (EC 2.8.2.-)							F1R826	gstt1b	Glutathione S-transferase theta 1b
A4FVI7	lsm7	LSM7 homolog, U6 small nuclear RNA and mRNA degradation-associated (LSM7 homolog, U6 small nuclear RNA associated (S. cerevisiae))							F1R833	nrap	Nebulin-related-anchoring protein
A4FVK4	rab8a	RAB8A, member RAS oncogene family (Rab8a protein)							F1R859	tonsl	Tonsoku-like protein
F8W3V1	tab3	TGF-beta-activated kinase 1 (MAP3K7)-binding protein 3 (Fragment)							F1R861	samhd1 si:dkeyp-44b8.8	Deoxynucleoside triphosphate triphosphohydrolase SAMHD1
A4IG09	ftr83 si:dkey-7b17.2	FinTRIM family, member 83 (Si:dkey-7b17.2 protein)							F1R886	cfb	Complement factor B
E9QGA3	micu1	Calcium uptake protein 1, mitochondrial							F1R898
A4IG34	plin6 zgc:162150	Perilipin 6 (Zgc:162150 protein)							F1R8A9
A4IG42	tcaf zgc:162193	TRPM8 channel-associated factor homolog							F1R8B4	gcn1 gcn1l1	GCN1 eIF2 alpha kinase activator homolog
A4IG47	dnajc10	DnaJ (Hsp40) homolog, subfamily C, member 10 (Dnajc10 protein)							F1R8C0
Z4YIK9	wash1	WAS protein family homolog 1							F1R8D7
A4IG65	klc2 MGC162288	MGC162288 protein							F1R8E7
A4IGC3	rilpl2 si:ch211-275j6.7 zgc:162589	RILP-like protein 2 (Rab-interacting lysosomal-like protein 2)							F1R8F2	si:ch211-74m13.3	Si:ch211-74m13.3
A4IGC8	aldh18a1	Delta-1-pyrroline-5-carboxylate synthase [Includes: Glutamate 5-kinase (GK) (EC 2.7.2.11) (Gamma-glutamyl kinase); Gamma-glutamyl phosphate reductase (GPR) (EC 1.2.1.41) (Glutamate-5-semialdehyde dehydrogenase) (Glutamyl-gamma-semialdehyde dehydrogenase)]							F1R8J6	ppt1	Palmitoyl-protein thioesterase 1 (ceroid-lipofuscinosis, neuronal 1, infantile)
A4IGF3	atp23 xrcc6bp1 zgc:162885	Mitochondrial inner membrane protease ATP23 homolog (EC 3.4.24.-)							F1R8L3	rpz5	Rapunzel 5
A4QN63	cnot2 zgc:162316	CCR4-NOT transcription complex, subunit 2 (Zgc:162316 protein)							F1R8M8	rsl1d1 si:dkey-16i5.10	Ribosomal L1 domain-containing 1
A4QN68	commd9 si:ch211-154e15.3 si:ch211-15d5.2	COMM domain-containing 9 (Si:ch211-154e15.3 protein)							F1R8N2	sb:cb37	Sb:cb37 (Fragment)
E7F225	zgc:163061	Zgc:163061							F1R8Q3	lrrc59	Leucine-rich repeat-containing protein 59
A4QNT9	stat5b stat5.2	Signal transducer and activator of transcription							F1R8R0	si:zfos-1897c11.1	Si:zfos-1897c11.1
A4QNU3	cldn11b cldn11	Claudin							F1R8S0	drap1	DR1-associated protein 1 (negative cofactor 2 alpha)
A4QNU7	sgpl1	Sgpl1 protein (Sphingosine-1-phosphate lyase 1)							F1R8S3	plcd1b	Phosphoinositide phospholipase C (EC 3.1.4.11)
A4QNV6	zgc:162184	Zgc:162184 (Zgc:162184 protein)							F1R8T2
A4QNX6	ctdspl2b ctdspl2 zgc:162265	CTD small phosphatase-like protein 2-B (CTDSP-like 2-B) (EC 3.1.3.-)							F1R8U0	krt94	Keratin 94
A4QNZ7	p33monox zgc:123105	Putative monooxygenase p33MONOX (EC 1.-.-.-)							F1R8W9
A4QP33	ppp2r5cb ppp2r5c si:dkey-241l7.9	Serine/threonine protein phosphatase 2A regulatory subunit							F1R8Z4	bsg	Basigin (Fragment)
A4QPA0	me3 im:7151680	Malic enzyme							F1R916	zgc:66473	Zgc:66473
A4U7F9	plod2	Procollagen lysine 2-oxoglutarate 5-dioxygenase 2b isoform (EC 1.14.11.4) (Procollagen-lysine, 2-oxoglutarate 5-dioxygenase 2)							F1R930	cnot10	CCR4-NOT transcription complex subunit 10
A4UU31	map2k4b MKK4B	MAP kinase kinase 4B (Mitogen-activated protein kinase kinase 4B)							F1R946	dtnbp1a	Dysbindin-A (Fragment)
A4VCH0	sacm1la si:ch211-222e23.8	Phosphatidylinositide phosphatase SAC1-A (EC 3.1.3.-) (Suppressor of actin mutations 1-like protein A)							F1R955
A4VCH4	vps35l zgc:163107	VPS35 endosomal protein sorting factor-like							F1R966	cltca	Clathrin heavy chain
A5A4L9	supt16h	FACT complex large subunit (SPT16 homolog, facilitates chromatin-remodeling subunit) (Suppressor of Ty 16 homolog)							F1R981	ube2d2 ube2d2l zgc:55886	Ubiquitin-conjugating enzyme E2D 2 (UBC4/5 homolog, yeast) (Zgc:55886) (Zgc:55886 protein)
A5D6S3	mut	Methylmalonyl CoA mutase (Mut protein)							F1R984	ubr4	Ubiquitin protein ligase E3 component n-recognin 4 (Fragment)
A5D6S6	polr2l zgc:112305	Polymerase (RNA) II (DNA directed) polypeptide L (Zgc:112305 protein)							F1R9A9	serpinb1l1	Serpin peptidase inhibitor, clade B (ovalbumin), member 1,-like 1
A5D6U5	txlna zgc:162882	Taxilin alpha (Zgc:162882 protein)							F1R9B8	si:ch211-241e1.3	Si:ch211-241e1.3 (Fragment)
A5D8S8	hexim zgc:162976	Protein HEXIM							F1R9C6	phb2b	Prohibitin 2b
A5HAK1	rnasel2	RNase 2 (Ribonuclease-like 2)							F1R9D2	pmela	Premelanosome protein a
A5PEY8	pak6b pak6 si:ch211-158b22.3	Non-specific serine/threonine protein kinase (EC 2.7.11.1)							F1R9I5	zgc:193505	Zgc:193505 (Fragment)
A5PF35	pphln1	Periphilin 1							F1R9P3	ttc38	Tetratricopeptide repeat protein 38 (Fragment)
A5PF59	leg1.2	Liver-enriched gene 1, tandem duplicate 2							F1R9P5
A5PF61	leg1a zgc:172246	Protein leg1a (Leg1-A) (Liver-enriched gene protein 1-A)							F1R9W9
A5PL98	sdhb	Succinate dehydrogenase [ubiquinone] iron-sulfur subunit, mitochondrial (EC 1.3.5.1) (Iron-sulfur subunit of complex II) (Ip)							F1R9X9
A5PLC1	kdelc2 zgc:165521	KDEL (Lys-Asp-Glu-Leu)-containing 2 (Zgc:165521 protein)							F1R9Y1	col14a1a col14a1	Collagen, type XIV, alpha 1a
A5PLC6	bag1 si:dkey-216e9.4	BCL2-associated athanogene 1 (Si:dkey-216e9.4 protein)							F1R9Y5	pck2	Phosphoenolpyruvate carboxykinase 2 (mitochondrial)
A5PLC7	rab8b	RAB8B, member RAS oncogene family (Rab8b protein)							F1R9Y8	hdlbpa hdlbp	High density lipoprotein-binding protein a
A5PLJ7	oxsr1a	Oxidative stress-responsive kinase 1a (Oxsr1a protein)							F1R9Y9	etfb	Electron transfer flavoprotein subunit beta
A5PLK2	lhpp zgc:165670	Phospholysine phosphohistidine inorganic pyrophosphate phosphatase (EC 3.1.3.-) (EC 3.6.1.1)							F1RA00
A5PM88	pls1	Plastin 1 (I isoform)							F1RA09	ppp1r10	Protein phosphatase 1, regulatory subunit 10
A5PM92	ppil4	Peptidyl-prolyl cis-trans isomerase (PPIase) (EC 5.2.1.8)							F1RA14
A5PMC1	syvn1	E3 ubiquitin-protein ligase synoviolin							F1RA51	itgb4	Integrin beta
A5PMC3	pld7 si:dkeyp-110e4.6	Si:dkeyp-110e4.6							F1RA88	adam10a	ADAM metallopeptidase domain 10a
A5PMC4	lman2	Lectin, mannose-binding 2							F1RA91	asl	Argininosuccinate lyase
A5PMF6	colgalt1 glt25d1 si:ch211-114l13.7 zgc:110667	Procollagen galactosyltransferase 1 (EC 2.4.1.50) (Collagen beta(1-O)galactosyltransferase 1) (Glycosyltransferase 25 family member 1) (Hydroxylysine galactosyltransferase 1)							F1RAA2	mapk14b	Mitogen-activated protein kinase (EC 2.7.11.24)
A5PMG2	si:ch211-199o1.2	Si:ch211-199o1.2							F1RAE9	stxbp2	Syntaxin-binding protein 2
A5PMG4	ahcyl1 CH211-199O1.3-001	Adenosylhomocysteinase (EC 3.3.1.1)							F1RAF9
A5PMG8	sort1b	Sortilin							F1RAG3	nid1a	Nidogen 1a
A5PMI3	nsun2	NOP2/Sun RNA methyltransferase family, member 2							F1RAJ8	ykt6	Synaptobrevin homolog YKT6
A5PMJ7	stx12	Syntaxin 12							F1RAM4	zgc:110339	Zgc:110339
A5PMM5	snx18a DKEY-53M7.1-001	Sorting nexin							F1RAM9	tmed7	Transmembrane p24-trafficking protein 7
A5PMP0	capn2b	Calpain 2, (m/II) large subunit b							F1RAN8	rap1gds1	Uncharacterized protein
A5PMP4	wdr83	WD repeat domain-containing protein 83							F1RAP6	serpinf2b	Serpin peptidase inhibitor, clade F (alpha-2 antiplasmin, pigment epithelium-derived factor), member 2b
A5PMP8	c3b.2	Complement component c3b, tandem duplicate 2							F1RAQ5	necap2	NECAP endocytosis-associated 2
A5PMQ1	lta4h	Leukotriene A(4) hydrolase (LTA-4 hydrolase) (EC 3.3.2.6)							F1RAU7
A5PMS9	ap1b1	AP complex subunit beta							F1RAV5	rps6ka1	Ribosomal protein S6 kinase (EC 2.7.11.1)
A5PMV7	ppp2r1ba ppp2r1a	Protein phosphatase 2, regulatory subunit A, beta a							F1RAV6	acin1a	Apoptotic chromatin condensation inducer 1a
A5PMY0	st14a	Suppressor of tumorigenicity 14 protein homolog (EC 3.4.21.109) (Serine protease 14)							F1RB09
A5PMY4	rpa3	Replication protein A3							F1RB12
A5PMZ3	scinlb	Scinderin-like b							F1RB32	arfgap2	ADP-ribosylation factor GTPase-activating protein 2
A5PN22	wdr44	WD repeat domain 44							F1RB70	chid1	Chitinase domain-containing protein 1
A5PN39	cryz	Crystallin, zeta (quinone reductase)							F1RB89	dync1li2	Dynein, cytoplasmic 1, light intermediate chain 2
A5PN55	me2 CH211-101J19.1-001	Malic enzyme							F1RB94	u2af1	U2 small nuclear RNA auxiliary factor 1
A5PN62	ddah2 si:dkey-46a12.1	Dimethylarginine dimethylaminohydrolase 2 (Si:dkey-46a12.1)							F1RBA4
A5WUL9	ifitm1 si:dkey-226m8.7 DKEY-226M8.7-001	IFITM1 (Interferon-induced transmembrane protein 1) (Novel interferon-induced transmembrane protein)							F1RBD2
A5WUM0	prkaa1 DKEY-226M8.8-001	Non-specific serine/threonine protein kinase (EC 2.7.11.1)							F1RBD7	plcd1a	Phosphoinositide phospholipase C (EC 3.1.4.11)
A5WUM7	dhrs11a	Dehydrogenase/reductase (SDR family) member 11a							F1RBE9
G1K2R4									F1RBF9	gorasp2	Golgi reassembly-stacking protein 2
A5WUQ0	optn	Optineurin							F1RBG8
A5WUQ7	apobb.2 si:dkeyp-88f5.1	Apolipoprotein Bb, tandem duplicate 2							F1RBJ7
A5WUR0	cdc40	Cell division cycle 40 homolog (S. cerevisiae)							F1RBN0	si:dkey-178e17.3	Si:dkey-178e17.3 (Fragment)
A5WUR6	kdm5ba	Lysine (K)-specific demethylase 5Ba							F1RBN6	ethe1	Ethylmalonic encephalopathy 1
A5WUS2	sulf2a sulf2	Extracellular sulfatase (EC 3.1.6.-)							F1RBR0	eif2b5	Eukaryotic translation initiation factor 2B, subunit 5 epsilon
A5WUT7	riok2	RIO kinase 2 (yeast)							F1RBR6	pter	Phosphotriesterase-related protein
A5WUY5	krt99 DKEY-90G20.1 DKEY-90G20.1-001	Keratin 99 (Novel keratin protein (Zgc:110712))							F1RBS6	nme2b.1	Nucleoside diphosphate kinase (EC 2.7.4.6)
A5WUZ2	btr26	Bloodthirsty-related gene family, member 26							F1RBT2	chd4b	Chromodomain helicase DNA-binding protein 4b
A5WUZ4	fhl3b	Four and a half LIM domains 3b							F1RBU6	aifm1 pdcd8	Apoptosis-inducing factor, mitochondrion-associated 1
A5WV15	acsl4b cwc15	Acyl-CoA synthetase long chain family member 4b (Protein CWC15 homolog)							F1RBW3	prkcsh	Protein kinase C substrate 80K-H
A5WV16	acsl4b	Acyl-CoA synthetase long chain family member 4b							F1RBZ6	eps8l1a eps8l1	Eps8-like 1a
A5WV64									F1RC05
A5WV65	sec22ba	Vesicle-trafficking protein SEC22b-A							F1RC92	cfap45	Cilia and flagella-associated protein 45 (Fragment)
A5WVI1	irgf1	Immunity-related GTPase family, f1							F1RCA1	uba1	Ubiquitin-like modifier-activating enzyme 1
A5WVI9	dnaja2b dnaja2l	DnaJ heat shock protein family (Hsp40) member A2b							F1RCB2	ddx3xb ddx3b pl10	DEAD-box helicase 3 X-linked b
A5WVL6	ctsla ctsl1a	Cathepsin La							F1RCF3	slc35c2	Solute carrier family 35 member C2
A5WVN8	si:dkey-238o13.4	Si:dkey-238o13.4							F1RCG2	ptges3b	Prostaglandin E synthase 3b (cytosolic)
A5WVQ0	nat10 NAT10	RNA cytidine acetyltransferase (EC 2.3.1.-) (18S rRNA cytosine acetyltransferase)							F1RCG7	fkbp4	Peptidylprolyl isomerase (EC 5.2.1.8)
A5WVQ1	caprin1b	Cell cycle-associated protein 1b							F1RCI9
A5WVR3	tsnaxip1	Translin-associated factor X-interacting protein 1							F1RCJ4	capn9	Calpain 9
A5WVS2									F1RCK3	si:dkey-85k7.10	Si:dkey-85k7.10 (Fragment)
A5WVS7	ing5a LOC792168	Inhibitor of growth protein							F1RCK9	sept9a	Septin 9a
A5WVU0	tbl1xr1b tbl1xr1	Transducin (beta)-like 1 X-linked receptor 1b							F1RCM3	psmb6	Proteasome subunit beta (EC 3.4.25.1)
A5WVU9	triqk si:ch211-160k22.1	Triple QxxK/R motif-containing protein (Triple repetitive-sequence of QXXK/R protein homolog)							F1RCM5	si:dkey-56e3.2	Si:dkey-56e3.2 (Fragment)
A5WVX0	itpa si:ch73-18j6.1 si:dkey-19f21.1	Inosine triphosphate pyrophosphatase (ITPase) (Inosine triphosphatase) (EC 3.6.1.9) (Non-canonical purine NTP pyrophosphatase) (Non-standard purine NTP pyrophosphatase) (Nucleoside-triphosphate diphosphatase) (Nucleoside-triphosphate pyrophosphatase) (NTPase)							F1RCP0	pi4kaa	Phosphatidylinositol 4-kinase, catalytic, alpha a
G1K2I9	mettl13	Methyltransferase-like 13							F1RCP2	osbpl7	Oxysterol-binding protein
A5WVX8	metap2a METAP2 metap2l	Methionine aminopeptidase 2 (MAP 2) (MetAP 2) (EC 3.4.11.18) (Initiation factor 2-associated 67 kDa glycoprotein) (Peptidase M) (p67) (p67eIF2)							F1RCR6	trip12 si:ch211-272f3.4	E3 ubiquitin-protein ligase TRIP12 (EC 2.3.2.26) (HECT-type E3 ubiquitin transferase TRIP12) (Thyroid receptor-interacting protein 12) (TR-interacting protein 12) (TRIP-12)
F6P9F0	s100u	S100 calcium-binding protein U (Fragment)							F1RCT7	kif16bb si:dkey-38k3.2	Kinesin family member 16Bb
A5WWB4	map2k1	Mitogen-activated protein kinase kinase 1							F1RCY6	upf1	UPF1, RNA helicase and ATPase
A5WWB6	zwilch si:ch211-242m18.4 si:ch73-94f11.1	Protein zwilch homolog							F1RD40	mycbp2	E3 ubiquitin-protein ligase MYCBP2 (EC 2.3.2.-) (Myc-binding protein 2) (Protein Esrom)
A5WWD2	elac1	ElaC ribonuclease Z 1							F1RD50	zgc:112962	Zgc:112962
X1WFA1									F1RD77	npm1b	Nucleophosmin 1b (Fragment)
A5WWD9	noxa1	NADPH oxidase activator 1							F1RDA6	ndufs1 ino80db	INO80 complex subunit D-B (NADH:ubiquinone oxidoreductase core subunit S1)
A5WWG5	srsf3b	Serine and arginine-rich-splicing factor 3b							F1RDC3
A5WWI2	cmpk CMPK CMPK1	UMP-CMP kinase (EC 2.7.4.14) (Deoxycytidylate kinase) (CK) (dCMP kinase) (Nucleoside-diphosphate kinase) (EC 2.7.4.6) (Uridine monophosphate/cytidine monophosphate kinase) (UMP/CMP kinase) (UMP/CMPK)							F1RDC5	xpo7	Exportin 7
A5WWI5	ahsg2	Alpha-2-HS-glycoprotein 2							F1RDE7	si:ch73-190m4.1	Si:ch73-190m4.1
A5WWM0	vps4b	Vacuolar protein sorting 4b homolog B (S. cerevisiae)							F1RDF4
A5YC70	mbnl2 mbnl2B	Muscleblind-like protein 2 isoform B (Muscleblind-like-splicing regulator 2)							F1RDF6	map2k4a	Mitogen-activated protein kinase kinase 4a
A6NA21	cavin1b ptrf ptrfb	Caveolae-associated protein 1b (Polymerase I and transcript release factor)							F1RDG4	si:dkey-222f2.1	Si:dkey-222f2.1
A7E2K1	tpm1 zgc:171719	Tropomyosin 1 (alpha) (Zgc:171719 protein)							F1RDI7	entpd2a.1	Ectonucleoside triphosphate diphosphohydrolase 2a, tandem duplicate 1
A7E2K4	rplp2l	Ribosomal protein, large P2,-like (Rplp2l protein)							F1RDN8	quo	Quattro
A7E2L8	lsm5 LSM5 zgc:171959	U6 snRNA-associated Sm-like protein LSm5							F1RDP7	lxn	Latexin
E9QGR8	emc10	ER membrane protein complex subunit 10							F1RDQ8
A7E2P9	dnajc19	DnaJ (Hsp40) homolog, subfamily C, member 19 (Mitochondrial import inner membrane translocase subunit TIM14)							F1RDQ9	ctsz	Cathepsin Z
A7E2Q2	ambp ambpl	Alpha-1-microglobulin/bikunin precursor (Ambpl protein)							F1RDR2	mrps27	Mitochondrial ribosomal protein S27
A7MBU9	cmbl zgc:171683	Carboxymethylenebutenolidase homolog (Pseudomonas) (Zgc:171683 protein)							F1RDT4	atp6v1e1a	ATPase H+-transporting V1 subunit E1a
A7MBY4	zgc:194989 zgc:114046 zgc:171759	Histone H2B							F1RDU2	glsb	Glutaminase b
B8A4V8	tma16	Translation machinery-associated protein 16							F1RDU8	si:dkey-65b12.6	Si:dkey-65b12.6
A7MCF0	fip1l1b fip1l1 zgc:103421	FIP1-like 1b (S. cerevisiae) (Zgc:103421 protein)							F1RDV2	ndufa10	NADH dehydrogenase [ubiquinone] 1 alpha subcomplex subunit 10, mitochondrial
A7MCI0	eif5a	Eukaryotic translation initiation factor 5A (eIF-5A)							F1RDW4
A7MCL7	cst14a.2 cst14a MGC174082	Cystatin 14a, tandem duplicate 2 (MGC174082 protein)							F1RDX0	polr2d	Polr2d protein (Polymerase (RNA) II (DNA directed) polypeptide D) (RNA polymerase II subunit D)
A7MCQ3	gtf2f2a gtf2f2 MGC174761	General transcription factor IIF subunit 2 (EC 3.6.4.12) (Transcription initiation factor IIF subunit beta)							F1RDX1	auh	AU RNA-binding protein/enoyl-CoA hydratase
A7MCR1	uqcrfs1	Cytochrome b-c1 complex subunit Rieske, mitochondrial (EC 7.1.1.8)							F1RDY4
A7MCR5	rfc3	replication factor C (Activator 1) 3							F1RDZ1	rab11al	RAB11a, member RAS oncogene family,-like
A7MD59	hmox2a si:dkey-44g23.7	Heme oxygenase (EC 1.14.14.18)							F1RE41	abi3a	ABI family, member 3a
A7YT47	hadhaa hadha	Hadha protein (Hydroxyacyl-CoA dehydrogenase trifunctional multienzyme complex subunit alpha a)							F1RE45
A7YT77	qdpra	Qdpra protein (Quinoid dihydropteridine reductase a)							F1RE51	si:dkey-85k15.6	Si:dkey-85k15.6 (Fragment)
H2ZRH9	nmt2	Glycylpeptide N-tetradecanoyltransferase (EC 2.3.1.97)							F1RE68
A7YY10	zgc:171772	Zgc:171772 (Zgc:171772 protein)							F1RE72	zgc:153317	Zgc:153317
A7YY99	atp5mea atp5ia zgc:171560	ATP synthase membrane subunit ea (Zgc:171560 protein)							F1RE77	vrk3	VRK serine/threonine kinase 3
E9QGV8	pabpn1	Poly(A)-binding protein, nuclear 1							F1RE78
A7YYI2	dtnbp1a	Dysbindin-A (Dystrobrevin binding protein 1a)							F1REA4
A8BAQ7	pcyt2	Phosphate cytidylyltransferase 2, ethanolamine							F1REC3
A8BBJ2	rtn4rl2a	Reticulon 4 receptor-like 2 a (Rtn4rl2a) (Fragment)							F1REE8	trip11	Thyroid hormone receptor interactor 11
A8DZ56	si:rp71-1i20.2	Si:rp71-1i20.2							F1REF6
A8DZ59	rnls	Renalase, FAD-dependent amine oxidase							F1REH0	vcla vcl	Vcl protein
A8DZ70	mtdha	Metadherin a							F1REH8	anxa13	Annexin
A8DZ85	robo3	Roundabout homolog 3 (Roundabout, axon guidance receptor, homolog 3 (Drosophila))							F1REJ8
A8DZ95	dpysl2b	Dihydropyrimidinase-like 2b							F1REL9	lamb1b	Laminin, beta 1b
A8DZA0	rbm25b	RNA-binding motif protein 25b							F1REN0	cul5a	Cullin 5a
A8DZD4	bnipl	BCL2-interacting protein-like							F2Z4R7	aldh2.2	Aldehyde dehydrogenase 2 family member, tandem duplicate 2
A8DZE4	gpib	Glucose-6-phosphate isomerase (EC 5.3.1.9)							F2Z4T4	akap12b	A kinase (PRKA) anchor protein 12b
A8DZG2	srsf6b	Serine and arginine-rich-splicing factor 6b							F2Z4U3	wls	Wnt ligand secretion mediator
A8DZG7	ripk1l	Receptor (TNFRSF)-interacting serine-threonine kinase 1,-like							F5H8N4	lrpprc	Leucine-rich pentatricopeptide repeat-containing
A8DZH1	fxyd1 DKEY-33I11.5-001	FXYD domain-containing ion transport regulator							F6NGD6	zgc:101540	Zgc:101540
A8DZH9	zgc:110366	Zgc:110366							F6NJS4	atl2	Atlastin GTPase 2
A8DZJ0	tbcb	Tubulin folding cofactor B							F6NK37
A8E526	rpl14	Ribosomal protein L14 (Rpl14 protein)							F6NKS7
A8E5F3	glod4	Glyoxalase domain-containing 4							F6NLI6	ppib	Peptidyl-prolyl cis-trans isomerase (PPIase) (EC 5.2.1.8)
A8E5H4	golga7 zgc:86753	Golgin A7 (Zgc:86753)							F6NMD4	si:ch211-288g17.4	Si:ch211-288g17.4
A8E5K6	cnot8	CCR4-NOT transcription complex, subunit 8							F6NP87	ndufa9a	NADH:ubiquinone oxidoreductase subunit A9a
A8E5K9	timm23a timm23	Mitochondrial import inner membrane translocase subunit TIM23							F6NPA4	col5a1	Procollagen, type V, alpha 1 (Fragment)
A8E5P7	zgc:174917	Zgc:174917 (Zgc:174917 protein)							F6NQ93	puf60a	Poly-U-binding-splicing factor a (Fragment)
A8E7C9	sec23ip	SEC23-interacting protein							F6NRG0	col6a3	Collagen, type VI, alpha 3 (Fragment)
L7MTQ8	cox14	Cytochrome c oxidase assembly factor COX14 (Fragment)							F6NTZ9	a2ml	Alpha-2-macroglobulin-like (Fragment)
A8E7E7	itsn1	Intersectin 1 (SH3 domain protein)							F6NXD5	marcksb	Myristoylated alanine-rich protein kinase C substrate b
A8E7F4	mhc1zba mhc1zha zgc:64115	MHC class I antigen ZBA transcript variant 1 (Major histocompatibility complex class I ZBA) (Zgc:64115 protein)							F6NXE7	cpsf1	Cleavage and polyadenylation-specific factor 1
A8E7G0	dhdhl	Dihydrodiol dehydrogenase (dimeric),-like							F6NZP4	esyt1b	Extended synaptotagmin-like protein 1b
A8E7G4	fam45a fam45 si:ch211-117n7.2	Protein FAM45A (Protein FAM45)							F6P2R4	gcat	Glycine C-acetyltransferase
A8E7G5	sfxn4	Sideroflexin-4							F6P3G4	psmd11a	26S proteasome non-ATPase regulatory subunit 11A (26S proteasome regulatory subunit RPN6-A)
A8E7G6	prdx3	Peroxiredoxin 3							F6P480	lad1	Ladinin
A8E7G8	tm9sf3	Transmembrane 9 superfamily member							F6P873	atp5mf atp5j2	ATP synthase membrane subunit f
A8E7I5	ttc36 si:rp71-52f21.2 zgc:103600	Tetratricopeptide repeat protein 36 (TPR repeat protein 36)							F6P921
A8E7I8	ccdc18	Coiled-coil domain-containing 18							F6P928	pipox	Pipecolic acid oxidase (Fragment)
A8E7K4									F6P9F0	s100u	S100 calcium-binding protein U (Fragment)
A8E7L1	anxa13l	Annexin							F6PAM1	gna11a	Guanine nucleotide-binding protein (G protein), alpha 11a (Gq class)
A8E7L6	nudcd1	NudC domain-containing protein 1							F6PBQ1	dhrs13a.1	Dehydrogenase/reductase (SDR family) member 13a, tandem duplicate 1
A8E7M5	cand2 si:dkey-72g22.1	Cullin-associated and neddylation-dissociated 2 (putative) (Si:dkey-72g22.1)							F6PCD2	si:ch211-197g15.6	Si:ch211-197g15.6
A8E7N0	junba	JunB proto-oncogene, AP-1 transcription factor subunit a							F6PD25	zfr2	Zinc finger RNA-binding protein 2 (Fragment)
A8E7N5	vps45	Vacuolar protein sorting 45 homolog (S. cerevisiae)							F6PEJ8	sc:d0202	Sc:d0202
A8E7N6	zgc:153441	Zgc:153441							F8W2C4
A8E7N8	psmb4	Proteasome subunit beta (EC 3.4.25.1)							F8W2E1	srrm1	Serine/arginine repetitive matrix 1
E7F605									F8W2G5
A8E7S3	sdr16c5a	Short chain dehydrogenase/reductase family 16C, member 5a							F8W2L5
A8E7S8	morf4l1	Mortality factor 4-like 1							F8W2L8	cd74a	CD74 molecule, major histocompatibility complex, class II invariant chain a
A8HAJ8	c8b	Complement component 8, beta polypeptide							F8W2M8	tpp1	Tripeptidyl-peptidase 1 (TPP-1) (EC 3.4.14.9) (Tripeptidyl aminopeptidase) (Tripeptidyl-peptidase I) (TPP-I)
A8KB34	aspa zgc:171507	Aspartoacylase (EC 3.5.1.15) (Aminoacylase-2) (ACY-2)							F8W2N5
A8KB74	ca5a ca5	Ca5 protein (Carbonic anhydrase Va)							F8W2P1	arl8a si:ch1073-204j4.2	ADP-ribosylation factor-like 8A
A8KB78	rps23 zgc:171710	Ribosomal protein S23 (Zgc:171710) (Zgc:171710 protein)							F8W2T2	rpa2	Replication protein A2
F1QBJ3	coa3a	Cytochrome c oxidase assembly factor 3 homolog, mitochondrial							F8W2V6	idh3b	Isocitrate dehydrogenase [NAD] subunit, mitochondrial
A8KBJ5	zgc:173552	Histone H3							F8W2W2
F1QEY2	mettl2a	Methyltransferase-like protein (EC 2.1.1.-)							F8W2Y9
A8KBR8	gstm.2 zgc:173994	Glutathione S-transferase mu tandem duplicate 2 (Zgc:173994 protein)							F8W305	csrp1b	Cysteine and glycine-rich protein 1b
A8KBU6	zgc:158846	Zgc:158846							F8W315	palld si:dkey-90m5.1	Palladin, cytoskeletal-associated protein
A8KBV5	znf1001 zgc:174234	Zgc:174234 protein (Zinc finger protein 1001)							F8W3B6	clic4	Chloride intracellular channel protein
A8KBX3	fn3krp MGC174333	Fructosamine 3 kinase-related protein (MGC174333 protein)							F8W3F8
A8KC02	cbr1l LOC792137	Carbonyl reductase 1-like (LOC792137 protein)							F8W3K1	eif3ja	Eukaryotic translation initiation factor 3 subunit J-A (Fragment)
A8KC22	hnrnpl2 hnrnpl	Heterogeneous nuclear ribonucleoprotein L2 (Hnrnpl protein)							F8W3K6	exosc2	Exosome component 2
F1R2A5									F8W3L6	myh9a	Myosin, heavy chain 9a, non-muscle (Fragment)
A8KC30	psmc1a	Proteasome (Prosome, macropain) 26S subunit, ATPase, 1a (Proteasome 26S subunit, ATPase 1a)							F8W3Q9	elnb	Elastin b
A8WFT4	scly zgc:171514	Selenocysteine lyase (Zgc:171514 protein)							F8W412	serpinb14 serpinb1l4	Serpin peptidase inhibitor, clade B (ovalbumin), member 14
F1R712	hykk.2	Hydroxylysine kinase, tandem duplicate 2							F8W442	gnao1a	Guanine nucleotide-binding protein (G protein), alpha-activating activity polypeptide O, a
A8WFU6	serpinh1a zgc:171630	Serpin peptidase inhibitor, clade H (heat shock protein 47), member 1a (Zgc:171630 protein)							F8W462
A8WG70	dnajc18	DnaJ (Hsp40) homolog, subfamily C, member 18 (Dnajc18 protein)							F8W475	serpinb1l4	Serpin peptidase inhibitor, clade B (ovalbumin), member 1,-like 4
A8WG92	acp6 zgc:172268	Acid phosphatase 6, lysophosphatidic (Zgc:172268 protein)							F8W4A0	myo5ab	Myosin VAb (Fragment)
A8WGC6	atp5f1b atp5b zgc:111961	ATP synthase subunit beta (EC 7.1.2.2)							F8W4C1	mbpb si:dkey-241k19.2	Myelin basic protein b
A8WGM1	vapal	VAMP (vesicle-associated membrane protein)-associated protein A,-like							F8W4C4	usp5	Ubiquitin carboxyl-terminal hydrolase (EC 3.4.19.12)
A8WGN2	cpn1	Carboxypeptidase N, polypeptide 1							F8W4C7	emilin1b	Elastin microfibril interfacer 1b
A8WGN9	lipf	Lipase							F8W4D6
A8WGP7	ugdh	UDP-glucose 6-dehydrogenase (EC 1.1.1.22)							F8W4E3	hnrnpaba hnrnpab hnrpab	Heterogeneous nuclear ribonucleoprotein A/B (Heterogeneous nuclear ribonucleoprotein A/Ba)
A8WGS0	cyb5a	Cyb5a protein (Cytochrome b5 type A (microsomal))							F8W4F3
E9QIC6	adrm1 adrm1b	Adhesion-regulating molecule 1 (Fragment)							F8W4H6	syne1b	Spectrin repeat-containing, nuclear envelope 1b
F1RCZ2	il6st	Interleukin 6 signal transducer							F8W4M7	aco2	Aconitate hydratase, mitochondrial (Aconitase) (EC 4.2.1.-) (Fragment)
A8WHN4	praf2	PRA1 family protein							F8W4Q1	dspa	Desmoplakin a
A8WHP1	paox1 si:dkey-7o6.3	Amine oxidase (EC 1.4.3.-)							F8W4V7	arpp19b	cAMP-regulated phosphoprotein 19b
A8WHP2	zgc:171480	Zgc:171480							F8W4W0
A8WHP4	gclm	Glutamate-cysteine ligase, modifier subunit							F8W4Z6	porb POR	NADPH--cytochrome P450 reductase (CPR) (P450R) (EC 1.6.2.4)
A8WHQ0	pcbp3	Poly(rC)-binding protein 3							F8W501	zgc:101569	Zgc:101569 (Fragment)
A8WHU6									F8W539	wu:fj11g02	Wu:fj11g02
A8WHV7	mrps36	Mitochondrial ribosomal protein S36							F8W542	mgp	Matrix Gla protein (Fragment)
A8WI00	stam2	Signal transducing adaptor molecule (SH3 domain and ITAM motif) 2							F8W569
A8WIN7	plod1a	Procollagen-lysine, 2-oxoglutarate 5-dioxygenase 1a							F8W573	gna14	Guanine nucleotide-binding protein (G protein), alpha 14
A8WIP2	mecp2	Methyl-CpG-binding protein 2 (MeCp-2 protein) (MeCp2)							F8W5C6	snx6	Sorting nexin
A8Y5U0	fbxo4 si:dkey-46a10.2	F-box protein 4 (Fragment)							F8W5H1	mtm1	Myotubularin 1
A8Y5U1	si:dkey-46a10.3 wu:fd42g01	UPF0600 protein C5orf51 homolog							F8W5I5
A9C3N2	rassf2a rassf2	Ras association (RalGDS/AF-6) domain family member 2a							F8W5K0	si:ch1073-441p17.1	Si:ch1073-441p17.1
A9C3P0	mlec si:dkey-117k10.5	Malectin							F8W5K2	bnip2	BCL2-interacting protein 2 (Fragment)
A9C3Q0	colgalt2 glt25d2 DKEY-150D12.5-001	Collagen beta(1-O)galactosyltransferase 2 (Novel protein similar to vertebrate glycosyltransferase 25 domain containing 1 (GLT25D1))							F8W5L5	ptpn6	Protein tyrosine phosphatase, non-receptor type 6 (Fragment)
A9C3Q5	atp2a2a	Calcium-transporting ATPase (EC 7.2.2.10)							F8W5T8
A9C3Q7	amt	Aminomethyltransferase (EC 2.1.2.10) (Glycine cleavage system T protein)							F8W5V3	ppp1r1c	Protein phosphatase 1, regulatory (inhibitor) subunit 1C
A9C3R9	rpe65b rpepb si:ch211-198n5.5	All-trans-retinyl ester 13-cis isomerohydrolase (13cIMH) (EC 3.1.1.90) (Meso-zeaxanthin isomerase) (EC 5.3.3.-) (Retinal pigment epithelium-specific 65 kDa protein homolog B) (RPE56b)							F8W5W6
A9C3S0	si:ch211-198n5.11	Si:ch211-198n5.11							F8W5X1	pabpn1	Poly(A)-binding protein, nuclear 1 (Fragment)
A9C3T0	prkar2aa	Protein kinase, cAMP-dependent, regulatory, type II, alpha A							F8W601	commd9	COMM domain-containing 9
A9C3W5	si:dkey-159f12.2	Si:dkey-159f12.2 (Fragment)							G1K2E7	cdh2	Cadherin-2
A9C462	cox6a1	Cytochrome c oxidase subunit 6A, mitochondrial (Cytochrome c oxidase polypeptide VIa)							G1K2P5	esrp2	Epithelial-splicing regulatory protein 2
A9JR96	wdr43 wdr43l	WD repeat domain 43							G1K2R9	fam83hb si:ch211-199g17.1	Family with sequence similarity 83 member Hb
A9JRA9	zgc:172053	Zgc:172053 (Zgc:172053 protein)							G8JL25	hdgfl2 hdgfrp2	Hepatoma-derived growth factor-related protein 2
A9JRB3	htra1b zgc:172061	Serine protease HTRA1B (EC 3.4.21.-) (High-temperature requirement A serine peptidase 1B)							H0WE38	mb	Myoglobin
A9JRB9	phospho2 zgc:172082	Phosphatase, orphan 2 (Zgc:172082 protein)							H0WES8	atp5md si:dkeyp-80c12.10	ATP synthase membrane subunit DAPIT
A9JRC7	ppp4cb zgc:172126	Serine/threonine-protein phosphatase 4 catalytic subunit B (PP4C-B) (EC 3.1.3.16)							H0WEW3
A9JRE2	mri1 zgc:172216	Methylthioribose-1-phosphate isomerase (M1Pi) (MTR-1-P isomerase) (EC 5.3.1.23) (S-methyl-5-thioribose-1-phosphate isomerase) (Translation initiation factor eIF-2B subunit alpha/beta/delta-like protein)							H0WF22	si:dkey-222f8.3	Si:dkey-222f8.3 (Fragment)
A9JRP8	zgc:86896	Actin-related protein 2/3 complex subunit							H0WF44	b2m	Beta-2-microglobulin
A9JRS9	ap3m1	Adaptor-related protein complex 3 subunit mu 1 (Adaptor-related protein complex 3, mu 1 subunit)							H0WF62
A9JRU2	pdp1 zgc:174908	Pyruvate dehyrogenase phosphatase catalytic subunit 1 (Zgc:174908 protein)							H0WF87
Q6DGB7	rac3a rac3	Rac family small GTPase 3a (Ras-related C3 botulinum toxin substrate 3 (Rho family, small GTP binding protein Rac3))							H7BWW7	col4a3bpa	Collagen, type IV, alpha 3 (Goodpasture antigen)-binding protein a
A9JRZ0	smurf2	E3 ubiquitin-protein ligase SMURF2 (EC 2.3.2.26) (HECT-type E3 ubiquitin transferase SMURF2) (SMAD ubiquitination regulatory factor 2) (SMAD-specific E3 ubiquitin-protein ligase 2)							H9GX53
A9JSW0	fkbp2 zgc:101826	Peptidylprolyl isomerase (EC 5.2.1.8)							H9GX78	actn4	Actinin, alpha 4
A9JT06	eif4e1c zgc:110154	Eukaryotic translation initiation factor 4E family member 1c (Zgc:110154 protein)							H9GX84
A9JTA8	rangap1b rangap1	Ran GTPase-activating protein 1b (Rangap1 protein)							H9GXB0
A9JTB1	npl	Npl protein							H9GXB1
A9JTC4	memo1	Mediator of cell motility 1 (Protein MEMO1)							H9GXE6
A9JTC8	gnai3	Gnai3 protein (Guanine nucleotide-binding protein (G protein), alpha-inhibiting activity polypeptide 3)							H9GXE9
A9JTF1	qkia qk	Protein quaking-A (Quaking)							H9GXG6
A9JTF3	qki2 zgc:65890	QKI, KH domain-containing, RNA-binding 2 (Zgc:65890 protein)							H9GXG9
A9JTF6	znf576.2 zgc:175096	Zgc:175096 protein							H9GXI2
F1QMZ6	ncalda	Neurocalcin-delta A							H9GXL1	zmp:0000001114	Zmp:0000001114
A9UH06	mbnl1 mbnl1d	Muscleblind-like protein 1D (Muscleblind-like-splicing regulator 1)							H9GXL4
A9ULS4	rab6a	RAB6A, member RAS oncogene family (Rab6a protein)							H9GXR0
A9ZPF1	cxcl19	Chemokine (C-X-C motif) ligand 19 (Chemokine CXCL-C13d)							H9GXV0
B0BLX4	zgc:175088	Zgc:175088 (Zgc:175088 protein)							H9GXW2
B0BLY0	exoc5 zgc:175220	Exocyst complex component 5 (Zgc:175220) (Zgc:175220 protein)							H9GXY8
B0CLW6	pvrl2l si:dkey-225e11.1	Poliovirus receptor-related 2-like (Si:dkey-225e11.1)							H9GXZ3
F1QIN7	mgrn1b	Mahogunin, ring finger 1b							H9GY06
B0JZL7	enpp1 si:ch211-142e24.2	Ectonucleotide pyrophosphatase/phosphodiesterase 1 (Si:ch211-142e24.2 protein)							H9GY11
B0JZL9	ube2z LOC100000648	LOC100000648 protein (Ubiquitin-conjugating enzyme E2 Z)							H9GY30
B0JZM6	ugt5g1 zgc:175099	UDP-glucuronosyltransferase (EC 2.4.1.17)							H9GY37
B0JZP5	dnase2	Deoxyribonuclease II, lysosomal (Dnase2 protein)							H9GY81
B0R023	nedd8l nedd8 zC14A17.5-001	NEDD8 (Neural precursor cell-expressed, developmentally down-regulated 8,-like) (Novel ubiquitin-like protein)							H9GYA7
B0R024									H9GYB1
B0R026	prmt5 zC14A17.2-001	Protein arginine N-methyltransferase 5 (EC 2.1.1.-)							H9GYB8
B0R028	psmb5 psmb5-001	Proteasome subunit beta (EC 3.4.25.1)							H9GYC1
B0R061	smarcad1a smarcad1 si:ch211-247l22.2 zgc:113183	SWI/SNF-related matrix-associated actin-dependent regulator of chromatin subfamily A containing DEAD/H box 1A (EC 3.6.4.12)							H9GYG0
B0R068	atp1a1b	Sodium/potassium-transporting ATPase subunit alpha							H9GYG2
B0R069	rcan1a	Regulator of calcineurin 1a							H9GYI8
B0R0B1	cbwd	COBW domain-containing							H9GYJ2
B0R0B4	si:dkey-91m11.5	Si:dkey-91m11.5							H9GYJ9
B0R0D7	coro1ca	Coronin-1C-A							H9GYP7
B0R0I1	mmp14b	Matrix metallopeptidase 14b (membrane-inserted)							H9GYQ0
B0R0K6	prf1.5 si:ch211-103n10.4	Perforin 1.5							H9GYW8
B0R0K9	si:ch211-103n10.5	Si:ch211-103n10.5							H9GYZ5
B0R0N8	si:ch211-133n4.9	Si:ch211-133n4.9							H9GZA6
B0R0Q2	igf1rb	Tyrosine-protein kinase receptor (EC 2.7.10.1)							H9GZC8
G1K2V6									H9GZF3
B0R0V1	pold2	Polymerase (DNA directed), delta 2, regulatory subunit							H9GZI4
B0R0V3	gpkow t54l	G-patch domain and KOW motifs-containing protein							I3IRW7	abat	4-aminobutyrate aminotransferase
Q6PC35	atp6v1h	V-type proton ATPase subunit H							I3IRX8	rcn3	Reticulocalbin 3, EF-hand calcium-binding domain
B0R0Z3	nup35	Nucleoporin NUP35 (Fragment)							I3IS20	uqcrb	Cytochrome b-c1 complex subunit 7
B0R136	sult1st9 sult1st8	Sulfotransferase (EC 2.8.2.-) (Fragment)							I3ISA3	myh10	Myosin, heavy chain 10, non-muscle
B0R137	sult1st1	Sulfotransferase (EC 2.8.2.-)							I3ISA6	eppk1	Epiplakin 1
B0R159	bckdk	Branched chain ketoacid dehydrogenase kinase							I3ISH4	lypla2	Lysophospholipase 2
B0R171	copb2	Coatomer subunit beta'							I3ISJ2	uqcrh	Cytochrome b-c1 complex subunit 6
B0R194	polb	DNA polymerase (EC 2.7.7.7)							I3ISP1	pcnt si:ch211-245b3.1	Pericentrin
B0R197	vdac3	Voltage-dependent anion channel 3							I3ISQ1	tpm3	Tropomyosin 3
B0R199	ikbkb	Inhibitor of kappa light polypeptide gene enhancer in B-cells, kinase beta							I3ISS5	usp7	Ubiquitin-specific peptidase 7 (herpes virus-associated)
B0R1B8	neflb nefl	Neurofilament, light polypeptide b							I3ISV3	nob1	NIN1 (RPN12)-binding protein 1 homolog
B0R1C4	fap si:dkey-81j5.3	Fibroblast activation protein, alpha							I3IT78	si:ch211-76l23.4	Si:ch211-76l23.4
B0R1D0	psmc4 CH211-265P12.8 CH211-265P12.8-001	Novel protein (Zgc:63709) (Proteasome 26S subunit, ATPase 4)							I3IT87	ap2m1b	AP-2 complex subunit mu-B
B0R1E9	mgst1.2	Microsomal glutathione S-transferase 1.2							I3ITA0	tra2a	Transformer 2 alpha homolog (Fragment)
E9QGJ1	arhgef16	Rho guanine nucleotide exchange factor (GEF) 16							I3ITJ0	rpl35a	Ribosomal protein L35a
B0S4Z5	dohh DOHH	Deoxyhypusine hydroxylase (DOHH) (EC 1.14.99.29) (Deoxyhypusine dioxygenase) (Deoxyhypusine monooxygenase)							I3ITK2	actr10	Actin-related protein 10 (Fragment)
B0S510	pptc7a pptc7	PTC7 protein phosphatase homolog a							I3ITK3	si:dkey-19e4.5	Si:dkey-19e4.5
F6NVQ2									I3ITN9	aldh1l1	10-formyltetrahydrofolate dehydrogenase (EC 1.5.1.6)
B0S522	rbm45	RNA-binding motif protein 45							I3ITP3	mbpa	Myelin basic protein a
B0S533	lig1	DNA ligase (EC 6.5.1.1)							K7DY51	srsf7a	Serine and arginine-rich-splicing factor 7a
B0S577	tp73	Cellular tumor antigen p53							K7DY54
Q6P020	mapre1a mapre1l	Mapre1l protein (Microtubule-associated protein, RP/EB family, member 1a)							K7DY88
B0S5A4	si:ch211-150o23.2	Si:ch211-150o23.2							K7DY89
B0S5A9	golga1	Golgin A1							K7DY99	ttc27	Tetratricopeptide repeat domain 27
B0S5B9	sypa	Synaptophysin a							K7DYN8	si:ch211-140m22.7	Si:ch211-140m22.7 (Fragment)
B0S5C4									M9MMF7	ighv1-4	Immunoglobulin heavy variable 1-4 (Fragment)
B0S5C5	acaa2	Acetyl-CoA acyltransferase 2							O42248	gnb2l1 rack1	Guanine nucleotide-binding protein subunit beta-2-like 1 (Receptor of activated protein kinase C) (RACK)
B0S5C8	gle1 gle1l	Nucleoporin GLE1							O42363	apoa1 apoa zgc:103718	Apolipoprotein A-I (Apo-AI) (ApoA-I) (Apolipoprotein A1) [Cleaved into: Proapolipoprotein A-I (ProapoA-I)]
B0S5D9	tm9sf2	Transmembrane 9 superfamily member							O42364	apoeb apoe	Apolipoprotein Eb (Apo-Eb)
B0S5H0	ccdc22	Coiled-coil domain-containing protein 22							O42376	mapk12 sapk3	Mitogen-activated protein kinase 12 (MAP kinase 12) (MAPK 12) (EC 2.7.11.24) (Stress-activated protein kinase 3)
B0S5H7	si:ch211-229n2.7	Si:ch211-229n2.7							O57330	psmb8a LMP7 psmb8 CH211-51F10.3-001 psmb8-001	Proteasome subunit beta (EC 3.4.25.1)
B0S5I6	ndc1 tmem48	Nucleoporin NDC1							O73872	sod1 cuzn	Superoxide dismutase [Cu-Zn] (EC 1.15.1.1)
B0S5J0	yipf1	Protein YIPF (Fragment)							P59015	vps18	Vacuolar protein sorting-associated protein 18 homolog
B0S5L8	mcm3ap	Minichromosome maintenance complex component 3-associated protein							P61485	rpl36a	60S ribosomal protein L36a
B0S5M0	snx4	Sorting nexin 4							P62084	rps7 zgc:73216	40S ribosomal protein S7
B0S5M3	osbpl11 si:dkey-101k6.4	Oxysterol-binding protein (Fragment)							P62247	rps8	40S ribosomal protein S8
B0S5N7	blvra	Biliverdin reductase A							P79735	ran	GTP-binding nuclear protein Ran (GTPase Ran) (Ras-related nuclear protein)
B0S5P6	vsig8b si:ch211-145m1.1	V-set and immunoglobulin domain-containing 8b							P83571	ruvbl2	RuvB-like 2 (EC 3.6.4.12) (Reptin) (zReptin)
B0S5P9	fndc3ba	Fibronectin type III domain-containing 3Ba							Q08BA1	atp5fa1 atp5a1	ATP synthase subunit alpha
B0S5Q3	sdhc	Succinate dehydrogenase complex, subunit C, integral membrane protein							Q08BB5	ctdspl2a zgc:154017	CTD small phosphatase-like protein 2-A (CTDSP-like 2-A) (EC 3.1.3.-)
B0S5Q5	atp1a2a	Sodium/potassium-transporting ATPase subunit alpha							Q08BC5	hsd17b7 zgc:153977	Hydroxysteroid (17-beta) dehydrogenase 7 (Zgc:153977)
B0S5S6	pdia5	Protein disulfide isomerase family A, member 5							Q08BE3	slmapa zgc:153887	Sarcolemma-associated protein a (Zgc:153887)
B0S5S9	acbd6	Acyl-CoA-binding domain-containing protein 6							Q08BI9	mcu zgc:153607	Calcium uniporter protein, mitochondrial
B0S5U2	trim33	E3 ubiquitin-protein ligase TRIM33							Q08BR1	dr1 zgc:152914	Down-regulator of transcription 1 (Zgc:152914)
[truncated: 10,502 more rows]
